# Supplementary material for: Whole Genome Sequence of an Edible Mushroom Oudemansiella raphanipes (Changgengu)
Source: J Fungi (Basel). 2023 Feb 16;9(2):266. doi: 10.3390/jof9020266 (PMC9961838; doi:10.3390/jof9020266)
Supplement: Supplementary file 1 [file jof-09-00266-s001.zip]

Archive with 4 entries (4 files):
- Supplemental Materials-Figure S1.pdf
- Table S1.xlsx
- Table S2.xlsx
- Table S3.xlsx
