# Supplementary material for: Whole Genome Sequence of an Edible Mushroom Oudemansiella raphanipes (Changgengu)
Source: J Fungi (Basel). 2023 Feb 16;9(2):266. doi: 10.3390/jof9020266 (PMC9961838; doi:10.3390/jof9020266)
Supplement: Supplementary file 1 [file jof-09-00266-s001.zip › Table S1.xlsx]

## Sheet: Sheet2
Table S1. Genome annotation of O. raphanipes CGG-A-s1 by EggNOGmapper, SwissProt, and Pfam databases
protein_id	eggNOG_OGs	best_OG_name	swissprot_annotation	pfam description of target	signalp	tmhmm	seceted_proteins
MDBOrad1_00001						1
MDBOrad1_00002
MDBOrad1_00003						1
MDBOrad1_00004	2EJ3D@1|root,2SPCJ@2759|Eukaryota,3AM39@33154|Opisthokonta,3PDYE@4751|Fungi,3V5D3@5204|Basidiomycota,22C1X@155619|Agaricomycetes,3W7CD@5338|Agaricales	3PDYE@4751|Fungi
MDBOrad1_00005
MDBOrad1_00006
MDBOrad1_00007	COG0514@1|root,KOG0351@2759|Eukaryota,39XWQ@33154|Opisthokonta,3P10I@4751|Fungi,3V40M@5204|Basidiomycota,22B6H@155619|Agaricomycetes,3W9ZN@5338|Agaricales	3P10I@4751|Fungi	RecName: Full=ATP-dependent DNA helicase tlh1; AltName: Full=Sub-telomeric helicase RecQ homolog 1 [Schizosaccharomyces pombe 972h-]	Type III restriction enzyme, res subunit
MDBOrad1_00008
MDBOrad1_00009						3
MDBOrad1_00010						1
MDBOrad1_00011
MDBOrad1_00012	COG0514@1|root,KOG0351@2759|Eukaryota,39XWQ@33154|Opisthokonta,3P10I@4751|Fungi,3V40M@5204|Basidiomycota,225EC@155619|Agaricomycetes,3W8RN@5338|Agaricales	3P10I@4751|Fungi		DEAD/DEAH box helicase
MDBOrad1_00013						4
MDBOrad1_00014	KOG4339@1|root,KOG4339@2759|Eukaryota,39S5X@33154|Opisthokonta,3NVE2@4751|Fungi,3V0YF@5204|Basidiomycota,227EV@155619|Agaricomycetes,3W4R1@5338|Agaricales	3NVE2@4751|Fungi
MDBOrad1_00015	2EP6B@1|root,2SSEW@2759|Eukaryota,3AXS0@33154|Opisthokonta,3PIX4@4751|Fungi,3V85G@5204|Basidiomycota,22BZ1@155619|Agaricomycetes,3H79A@355688|Agaricomycetes incertae sedis	3PIX4@4751|Fungi
MDBOrad1_00016	2ENRD@1|root,2SS3Q@2759|Eukaryota,3ANUB@33154|Opisthokonta,3PEY4@4751|Fungi,3V6D6@5204|Basidiomycota,22CBJ@155619|Agaricomycetes,3H7GR@355688|Agaricomycetes incertae sedis	3PEY4@4751|Fungi		BTB/POZ domain
MDBOrad1_00017
MDBOrad1_00018
MDBOrad1_00019					SP(Sec/SPI)	1
MDBOrad1_00020
MDBOrad1_00021	KOG1325@1|root,KOG1325@2759|Eukaryota,38GBY@33154|Opisthokonta,3NUWK@4751|Fungi,3UYSM@5204|Basidiomycota,2287P@155619|Agaricomycetes,3H0F5@355688|Agaricomycetes incertae sedis	3NUWK@4751|Fungi	RecName: Full=Lysophospholipase 1; AltName: Full=Phospholipase B 1; Flags: Precursor [Aspergillus fumigatus A1163]_x0001_P0C957.1 RecName: Full=Lysophospholipase 1; AltName: Full=Phospholipase B 1; Flags: Precursor [Aspergillus fumigatus Af293]	Lysophospholipase catalytic domain	SP(Sec/SPI)		yes
MDBOrad1_00022	COG0515@1|root,COG2199@1|root,COG3899@1|root,COG5002@1|root,COG0515@2|Bacteria,COG3706@2|Bacteria,COG3899@2|Bacteria,COG5002@2|Bacteria,2IBPU@201174|Actinobacteria,4DAU6@85008|Micromonosporales	2IBPU@201174|Actinobacteria	RecName: Full=Serine/threonine-protein kinase pakH [Dictyostelium discoideum]	Phosphotransferase enzyme family
MDBOrad1_00023
MDBOrad1_00024
MDBOrad1_00025				MYND finger
MDBOrad1_00026	2EWG9@1|root,2SYA8@2759|Eukaryota,3AS3P@33154|Opisthokonta,3PIFF@4751|Fungi,3V6ZJ@5204|Basidiomycota,22DNB@155619|Agaricomycetes,3H7UC@355688|Agaricomycetes incertae sedis	seed_ortholog@40492.XP_007303399.1|-		F-box-like
MDBOrad1_00027
MDBOrad1_00028	KOG1406@1|root,KOG1406@2759|Eukaryota,38CKQ@33154|Opisthokonta,3NVYV@4751|Fungi,3UZ5Y@5204|Basidiomycota,2287F@155619|Agaricomycetes,3W36G@5338|Agaricales	3NVYV@4751|Fungi	RecName: Full=Sterol carrier protein 2; Short=SCP-2; AltName: Full=Acetyl-CoA C-myristoyltransferase; AltName: Full=Non-specific lipid-transfer protein; Short=NSL-TP; AltName: Full=Propanoyl-CoA C-acyltransferase; AltName: Full=SCP-2/3-oxoacyl-CoA thiolase; AltName: Full=SCP-2/thiolase; AltName: Full=SCP-chi; AltName: Full=Sterol carrier protein X; Short=SCP-X; AltName: Full=Straight-chain acyl-C…	Thiolase, N-terminal domain
MDBOrad1_00029				HMG (high mobility group) box
MDBOrad1_00030
MDBOrad1_00031				F-box-like
MDBOrad1_00032	2CMJD@1|root,2QQIE@2759|Eukaryota,392QS@33154|Opisthokonta,3NV1N@4751|Fungi,3V0T8@5204|Basidiomycota,228IR@155619|Agaricomycetes,3H31U@355688|Agaricomycetes incertae sedis	3NV1N@4751|Fungi		Protein of unknown function (DUF4246)
MDBOrad1_00033	2EWG9@1|root,2SYA8@2759|Eukaryota,3AS3P@33154|Opisthokonta,3PIFF@4751|Fungi,3V6ZJ@5204|Basidiomycota,22CVF@155619|Agaricomycetes,3W9CY@5338|Agaricales	3PIFF@4751|Fungi
MDBOrad1_00034	KOG1721@1|root,KOG1721@2759|Eukaryota,39KVP@33154|Opisthokonta,3Q59A@4751|Fungi,3V7CH@5204|Basidiomycota,22CQG@155619|Agaricomycetes,3W9DE@5338|Agaricales	3Q59A@4751|Fungi		Zinc finger, C2H2 type
MDBOrad1_00035	COG4724@1|root,KOG2331@2759|Eukaryota,3AJ99@33154|Opisthokonta,3PB0M@4751|Fungi,3V4AW@5204|Basidiomycota,22E61@155619|Agaricomycetes	3PB0M@4751|Fungi	RecName: Full=Cytosolic endo-beta-N-acetylglucosaminidase 1; Short=ENGase 1; AltName: Full=Endo-beta-N-acetyglucosaminidase 85A; Short=AtENGase85A [Arabidopsis thaliana]	Glycosyl hydrolase family 85
MDBOrad1_00036	KOG0406@1|root,KOG0406@2759|Eukaryota,3A0J7@33154|Opisthokonta,3P2DJ@4751|Fungi,3V1SE@5204|Basidiomycota,228GS@155619|Agaricomycetes,3H0CN@355688|Agaricomycetes incertae sedis	3P2DJ@4751|Fungi	RecName: Full=Glutathione S-transferase U26; Short=AtGSTU26; AltName: Full=GST class-tau member 26 [Arabidopsis thaliana]	Glutathione S-transferase, N-terminal domain
MDBOrad1_00037
MDBOrad1_00038	2D4N5@1|root,2SVPC@2759|Eukaryota,3ARJS@33154|Opisthokonta,3PFTK@4751|Fungi,3V69T@5204|Basidiomycota,22AZ2@155619|Agaricomycetes,3W8JZ@5338|Agaricales	3PFTK@4751|Fungi		Integrase core domain
MDBOrad1_00039	29V7Q@1|root,2RXKA@2759|Eukaryota,39TIT@33154|Opisthokonta,3NXZU@4751|Fungi,3V0JS@5204|Basidiomycota,227S6@155619|Agaricomycetes,3W7XP@5338|Agaricales	3NXZU@4751|Fungi		Ferritin-like domain	SP(Sec/SPI)		yes
MDBOrad1_00040	2CFA3@1|root,2R3FR@2759|Eukaryota,3AYCR@33154|Opisthokonta,3PJHF@4751|Fungi,3V8V0@5204|Basidiomycota,22DI7@155619|Agaricomycetes,3W8JQ@5338|Agaricales	3PJHF@4751|Fungi
MDBOrad1_00041	2EXPH@1|root,2SZB0@2759|Eukaryota,3ASUI@33154|Opisthokonta,3PI3S@4751|Fungi,3V778@5204|Basidiomycota,22B8I@155619|Agaricomycetes,3W9HC@5338|Agaricales	3PI3S@4751|Fungi
MDBOrad1_00042	COG4934@1|root,2QR6D@2759|Eukaryota,38GAV@33154|Opisthokonta,3PAC1@4751|Fungi,3V49K@5204|Basidiomycota,22BKP@155619|Agaricomycetes,3W8PG@5338|Agaricales	3PAC1@4751|Fungi	RecName: Full=Tripeptidyl-peptidase sed2; AltName: Full=Sedolisin-B; Flags: Precursor [Aspergillus fumigatus Af293]	Pro-kumamolisin, activation domain	SP(Sec/SPI)		yes
MDBOrad1_00043	COG0642@1|root,KOG0519@2759|Eukaryota,38E1E@33154|Opisthokonta,3NXNC@4751|Fungi,3UYDH@5204|Basidiomycota,2277K@155619|Agaricomycetes,3H1RK@355688|Agaricomycetes incertae sedis	3NXNC@4751|Fungi	RecName: Full=Hybrid signal transduction histidine kinase J [Dictyostelium discoideum]	HAMP domain
MDBOrad1_00044
MDBOrad1_00045
MDBOrad1_00046
MDBOrad1_00047	COG5411@1|root,KOG0565@2759|Eukaryota,38DP3@33154|Opisthokonta,3NUKE@4751|Fungi,3UZPT@5204|Basidiomycota,228F8@155619|Agaricomycetes,3H41S@355688|Agaricomycetes incertae sedis	3NUKE@4751|Fungi	RecName: Full=Probable inositol polyphosphate 5-phosphatase C9G1.10c [Schizosaccharomyces pombe 972h-]
MDBOrad1_00048	COG3914@1|root,KOG4626@2759|Eukaryota,39VDV@33154|Opisthokonta,3NY6D@4751|Fungi,3V4EY@5204|Basidiomycota	3NY6D@4751|Fungi		CHAT domain
MDBOrad1_00049	2D47F@1|root,2SU6E@2759|Eukaryota,3APWI@33154|Opisthokonta,3PFSS@4751|Fungi,3V6G5@5204|Basidiomycota,22B5C@155619|Agaricomycetes,3W898@5338|Agaricales	3PFSS@4751|Fungi		Family of unknown function (DUF6699)
MDBOrad1_00050			RecName: Full=Probable serine/threonine-protein kinase mkcD; AltName: Full=MAP kinase cascade D [Dictyostelium discoideum]	Protein kinase domain
MDBOrad1_00051
MDBOrad1_00052	KOG0406@1|root,KOG0406@2759|Eukaryota,3A0J7@33154|Opisthokonta,3P2DJ@4751|Fungi,3V1SE@5204|Basidiomycota,228GS@155619|Agaricomycetes,3H0CN@355688|Agaricomycetes incertae sedis	3P2DJ@4751|Fungi	RecName: Full=Glutathione S-transferase U26; Short=AtGSTU26; AltName: Full=GST class-tau member 26 [Arabidopsis thaliana]	Glutathione S-transferase, N-terminal domain
MDBOrad1_00053	COG1028@1|root,KOG1208@2759|Eukaryota,3A6YV@33154|Opisthokonta,3P5BR@4751|Fungi,3V1K5@5204|Basidiomycota,22FD4@155619|Agaricomycetes,3W6XK@5338|Agaricales	3P5BR@4751|Fungi	RecName: Full=Short-chain dehydrogenase/reductase ATR10; AltName: Full=Core atranone cluster (CAC) protein 10 [Stachybotrys chlorohalonata IBT 40285]	short chain dehydrogenase
MDBOrad1_00054	2D37M@1|root,2SQHN@2759|Eukaryota,3AP3Q@33154|Opisthokonta,3PEVV@4751|Fungi,3V629@5204|Basidiomycota,22AZS@155619|Agaricomycetes	3PEVV@4751|Fungi		F-box-like
MDBOrad1_00055	294U3@1|root,2RBRP@2759|Eukaryota,3AY6W@33154|Opisthokonta,3PJC2@4751|Fungi,3V8NP@5204|Basidiomycota,22DBG@155619|Agaricomycetes,3W99X@5338|Agaricales	3PJC2@4751|Fungi
MDBOrad1_00056	2EHVF@1|root,2SNES@2759|Eukaryota,3AKHP@33154|Opisthokonta,3PDFA@4751|Fungi,3V58M@5204|Basidiomycota,229DA@155619|Agaricomycetes,3H56H@355688|Agaricomycetes incertae sedis	3PDFA@4751|Fungi
MDBOrad1_00057	2D1A0@1|root,2SHAR@2759|Eukaryota,3AIQT@33154|Opisthokonta,3PADR@4751|Fungi,3V3AE@5204|Basidiomycota,22651@155619|Agaricomycetes,3W7DP@5338|Agaricales	3PADR@4751|Fungi		Alpha/beta hydrolase family
MDBOrad1_00058	COG4724@1|root,KOG2331@2759|Eukaryota,3AJ99@33154|Opisthokonta,3PB0M@4751|Fungi,3V4AW@5204|Basidiomycota,22E61@155619|Agaricomycetes	3PB0M@4751|Fungi	RecName: Full=Cytosolic endo-beta-N-acetylglucosaminidase 1; Short=ENGase 1; AltName: Full=Endo-beta-N-acetyglucosaminidase 85A; Short=AtENGase85A [Arabidopsis thaliana]	Glycosyl hydrolase family 85
MDBOrad1_00059	KOG1721@1|root,KOG1721@2759|Eukaryota,39KVP@33154|Opisthokonta,3Q59A@4751|Fungi,3V7CH@5204|Basidiomycota,22CQG@155619|Agaricomycetes,3W9DE@5338|Agaricales	3Q59A@4751|Fungi		Zinc finger, C2H2 type
MDBOrad1_00060	2CV4F@1|root,2RR9P@2759|Eukaryota,38I7U@33154|Opisthokonta,3PK56@4751|Fungi,3V9Q9@5204|Basidiomycota,22CJS@155619|Agaricomycetes	3PK56@4751|Fungi				4
MDBOrad1_00061	2CMJD@1|root,2QQIE@2759|Eukaryota,392QS@33154|Opisthokonta,3NV1N@4751|Fungi,3V0T8@5204|Basidiomycota,228IR@155619|Agaricomycetes,3H31U@355688|Agaricomycetes incertae sedis	3NV1N@4751|Fungi		Protein of unknown function (DUF4246)
MDBOrad1_00062	2CP6U@1|root,2R0NS@2759|Eukaryota,3AYEW@33154|Opisthokonta,3PJJH@4751|Fungi,3V9QF@5204|Basidiomycota,22CU7@155619|Agaricomycetes,3W9C8@5338|Agaricales	3PJJH@4751|Fungi		F-box-like
MDBOrad1_00063	COG4088@1|root,KOG3062@2759|Eukaryota,38HII@33154|Opisthokonta,3NVJV@4751|Fungi,3V0RA@5204|Basidiomycota,2253K@155619|Agaricomycetes,3H1EJ@355688|Agaricomycetes incertae sedis	3NVJV@4751|Fungi	RecName: Full=Protein kti12 [Schizosaccharomyces pombe 972h-]	Chromatin associated protein KTI12
MDBOrad1_00064	2ERHT@1|root,2SUAM@2759|Eukaryota	2SUAM@2759|Eukaryota
MDBOrad1_00065	2CWQF@1|root,2RUZS@2759|Eukaryota,3AYE1@33154|Opisthokonta,3PJIQ@4751|Fungi,3V8WJ@5204|Basidiomycota,22AEF@155619|Agaricomycetes,3H76U@355688|Agaricomycetes incertae sedis	3PJIQ@4751|Fungi
MDBOrad1_00066	KOG1824@1|root,KOG1824@2759|Eukaryota,39JJQ@33154|Opisthokonta,3NVVP@4751|Fungi,3UYG3@5204|Basidiomycota,2266U@155619|Agaricomycetes,3W4UX@5338|Agaricales	3NVVP@4751|Fungi
MDBOrad1_00067	2C61T@1|root,2SJ8A@2759|Eukaryota,3AIH2@33154|Opisthokonta,3PAMD@4751|Fungi,3V38J@5204|Basidiomycota,228SK@155619|Agaricomycetes,3W4I4@5338|Agaricales	3PAMD@4751|Fungi		Family of unknown function (DUF6534)		7
MDBOrad1_00068	2CZBE@1|root,2S9HR@2759|Eukaryota,3A8YG@33154|Opisthokonta,3P7H9@4751|Fungi,3V34V@5204|Basidiomycota,22DS3@155619|Agaricomycetes,3W8G7@5338|Agaricales	3P7H9@4751|Fungi
MDBOrad1_00069
MDBOrad1_00070
MDBOrad1_00071	2BZDD@1|root,2SW3M@2759|Eukaryota,3AT1P@33154|Opisthokonta,3PJVT@4751|Fungi,3V9AM@5204|Basidiomycota,22AV7@155619|Agaricomycetes	3PJVT@4751|Fungi
MDBOrad1_00072	2CWQF@1|root,2RUZS@2759|Eukaryota,3AYE1@33154|Opisthokonta,3PJIQ@4751|Fungi,3V8WJ@5204|Basidiomycota,22AEF@155619|Agaricomycetes,3H76U@355688|Agaricomycetes incertae sedis	3PJIQ@4751|Fungi
MDBOrad1_00073	KOG1721@1|root,KOG1721@2759|Eukaryota,39KVP@33154|Opisthokonta,3Q59A@4751|Fungi,3V7CH@5204|Basidiomycota,22CQG@155619|Agaricomycetes,3W9DE@5338|Agaricales	3Q59A@4751|Fungi
MDBOrad1_00074	COG2147@1|root,KOG1696@2759|Eukaryota,38E34@33154|Opisthokonta,3NUT0@4751|Fungi,3UY07@5204|Basidiomycota,224XQ@155619|Agaricomycetes	3NUT0@4751|Fungi	RecName: Full=60S ribosomal protein L19-3 [Arabidopsis thaliana]	Ribosomal protein L19e
MDBOrad1_00075
MDBOrad1_00076
MDBOrad1_00077	KOG0605@1|root,KOG0605@2759|Eukaryota,38ETW@33154|Opisthokonta,3NVV5@4751|Fungi,3V06E@5204|Basidiomycota,224W4@155619|Agaricomycetes,3H1XE@355688|Agaricomycetes incertae sedis	3NVV5@4751|Fungi	RecName: Full=Serine/threonine-protein kinase sid2 [Schizosaccharomyces pombe 972h-]	Protein kinase domain
MDBOrad1_00078	2EKSX@1|root,2SQKR@2759|Eukaryota,3ANN2@33154|Opisthokonta,3PGWT@4751|Fungi,3V63M@5204|Basidiomycota,22AEN@155619|Agaricomycetes	3PGWT@4751|Fungi
MDBOrad1_00079	COG0642@1|root,KOG0519@2759|Eukaryota,38E1E@33154|Opisthokonta,3NXNC@4751|Fungi,3UYDH@5204|Basidiomycota,2277K@155619|Agaricomycetes	3NXNC@4751|Fungi	RecName: Full=Hybrid signal transduction histidine kinase J [Dictyostelium discoideum]	HAMP domain
MDBOrad1_00080	2EXNX@1|root,2SZAG@2759|Eukaryota,3AUXS@33154|Opisthokonta,3PHVD@4751|Fungi,3V737@5204|Basidiomycota,226UE@155619|Agaricomycetes,3H53K@355688|Agaricomycetes incertae sedis	3PHVD@4751|Fungi
MDBOrad1_00081	295EQ@1|root,2RCCR@2759|Eukaryota,3AYKJ@33154|Opisthokonta,3PJQU@4751|Fungi,3V93U@5204|Basidiomycota,22DSD@155619|Agaricomycetes,3W8HB@5338|Agaricales	3PJQU@4751|Fungi
MDBOrad1_00082	KOG1121@1|root,KOG1121@2759|Eukaryota,39KU3@33154|Opisthokonta,3Q57D@4751|Fungi,3VCJY@5204|Basidiomycota,22C69@155619|Agaricomycetes,3W95N@5338|Agaricales	3Q57D@4751|Fungi
MDBOrad1_00083	KOG1121@1|root,KOG1121@2759|Eukaryota,39KU3@33154|Opisthokonta,3Q57D@4751|Fungi,3VCJY@5204|Basidiomycota,22C69@155619|Agaricomycetes,3W95N@5338|Agaricales	3Q57D@4751|Fungi		hAT family C-terminal dimerisation region
MDBOrad1_00084	2EXNX@1|root,2SZAG@2759|Eukaryota,3AUXS@33154|Opisthokonta,3PHVD@4751|Fungi,3V737@5204|Basidiomycota,226UE@155619|Agaricomycetes,3H53K@355688|Agaricomycetes incertae sedis	3PHVD@4751|Fungi
MDBOrad1_00085
MDBOrad1_00086	2B2JW@1|root,2S0CW@2759|Eukaryota,3A2J5@33154|Opisthokonta,3P3P5@4751|Fungi,3V0X7@5204|Basidiomycota,22AHJ@155619|Agaricomycetes,3H78U@355688|Agaricomycetes incertae sedis	3P3P5@4751|Fungi
MDBOrad1_00087	2EBRF@1|root,2SHSB@2759|Eukaryota,3AII7@33154|Opisthokonta,3PB8V@4751|Fungi,3V43R@5204|Basidiomycota,224P1@155619|Agaricomycetes,3H1Q0@355688|Agaricomycetes incertae sedis	3PB8V@4751|Fungi
MDBOrad1_00088
MDBOrad1_00089	2B2JW@1|root,2S0CW@2759|Eukaryota,3A2J5@33154|Opisthokonta,3P3P5@4751|Fungi,3V0X7@5204|Basidiomycota,2YFA5@29000|Pucciniomycotina	3P3P5@4751|Fungi
MDBOrad1_00090	2EBRF@1|root,2SHSB@2759|Eukaryota,3AII7@33154|Opisthokonta,3PB8V@4751|Fungi,3V43R@5204|Basidiomycota,224P1@155619|Agaricomycetes,3H1Q0@355688|Agaricomycetes incertae sedis	3PB8V@4751|Fungi
MDBOrad1_00091
MDBOrad1_00092	2B2JW@1|root,2S0CW@2759|Eukaryota,3A2J5@33154|Opisthokonta,3P3P5@4751|Fungi,3V0X7@5204|Basidiomycota,2YFA5@29000|Pucciniomycotina	3P3P5@4751|Fungi
MDBOrad1_00093
MDBOrad1_00094	2B2JW@1|root,2S0CW@2759|Eukaryota,3A2J5@33154|Opisthokonta,3P3P5@4751|Fungi,3V0X7@5204|Basidiomycota,2YFA5@29000|Pucciniomycotina	3P3P5@4751|Fungi
MDBOrad1_00095	2EBRF@1|root,2SHSB@2759|Eukaryota,3AII7@33154|Opisthokonta,3PB8V@4751|Fungi,3V43R@5204|Basidiomycota,224P1@155619|Agaricomycetes,3H1Q0@355688|Agaricomycetes incertae sedis	3PB8V@4751|Fungi
MDBOrad1_00096				Caulimovirus viroplasmin
MDBOrad1_00097
MDBOrad1_00098
MDBOrad1_00099
MDBOrad1_00100	2EEI7@1|root,2SJXV@2759|Eukaryota,3AEQF@33154|Opisthokonta,3PB6V@4751|Fungi,3V3A3@5204|Basidiomycota,227Q7@155619|Agaricomycetes,3W8P1@5338|Agaricales	3W8P1@5338|Agaricales		Kyakuja-Dileera-Zisupton transposase
MDBOrad1_00101
MDBOrad1_00102	2B2JW@1|root,2S0CW@2759|Eukaryota,3A2J5@33154|Opisthokonta,3P3P5@4751|Fungi,3V0X7@5204|Basidiomycota,22AHJ@155619|Agaricomycetes,3H78U@355688|Agaricomycetes incertae sedis	3P3P5@4751|Fungi
MDBOrad1_00103	2D2NZ@1|root,2SNFT@2759|Eukaryota,3ACR0@33154|Opisthokonta,3P964@4751|Fungi,3V57B@5204|Basidiomycota,2291D@155619|Agaricomycetes,3H53C@355688|Agaricomycetes incertae sedis	3P964@4751|Fungi
MDBOrad1_00104	28K1W@1|root,2QSGD@2759|Eukaryota,39WBJ@33154|Opisthokonta,3PDGU@4751|Fungi,3V5AF@5204|Basidiomycota,2299S@155619|Agaricomycetes,3W50Q@5338|Agaricales	3PDGU@4751|Fungi
MDBOrad1_00105	2D2UM@1|root,2SP2I@2759|Eukaryota,3AMKC@33154|Opisthokonta,3PE7S@4751|Fungi,3V5NF@5204|Basidiomycota,22AQC@155619|Agaricomycetes,3W8H0@5338|Agaricales	3PE7S@4751|Fungi
MDBOrad1_00106
MDBOrad1_00107
MDBOrad1_00108
MDBOrad1_00109	2D3GZ@1|root,2SRIE@2759|Eukaryota,3ANI0@33154|Opisthokonta,3PEEV@4751|Fungi,3V5N1@5204|Basidiomycota,225HF@155619|Agaricomycetes,3H13F@355688|Agaricomycetes incertae sedis	3PEEV@4751|Fungi
MDBOrad1_00110	COG2801@1|root,KOG0017@2759|Eukaryota,3AKRK@33154|Opisthokonta,3PE9Z@4751|Fungi,3VCKX@5204|Basidiomycota,22D2F@155619|Agaricomycetes,3H292@355688|Agaricomycetes incertae sedis	3VCKX@5204|Basidiomycota		RNase H-like domain found in reverse transcriptase
MDBOrad1_00111	COG2801@1|root,KOG0017@2759|Eukaryota,3AKRK@33154|Opisthokonta,3PE9Z@4751|Fungi,3VCKX@5204|Basidiomycota,22D2F@155619|Agaricomycetes,3H292@355688|Agaricomycetes incertae sedis	3VCKX@5204|Basidiomycota
MDBOrad1_00112
MDBOrad1_00113
MDBOrad1_00114
MDBOrad1_00115
MDBOrad1_00116
MDBOrad1_00117	COG0514@1|root,KOG0353@2759|Eukaryota,39PXH@33154|Opisthokonta,3PBSV@4751|Fungi,3V3RU@5204|Basidiomycota,22FN0@155619|Agaricomycetes	3PBSV@4751|Fungi		DEAD/DEAH box helicase
MDBOrad1_00118	2EDKN@1|root,2SJ72@2759|Eukaryota,3AGPT@33154|Opisthokonta,3PC7N@4751|Fungi,3V3SE@5204|Basidiomycota,226V1@155619|Agaricomycetes,3W8AF@5338|Agaricales	3PC7N@4751|Fungi		Family of unknown function (DUF6589)
MDBOrad1_00119	2EDKN@1|root,2SJ72@2759|Eukaryota,3AGPT@33154|Opisthokonta,3PC7N@4751|Fungi,3V3SE@5204|Basidiomycota,226V1@155619|Agaricomycetes,3H3HT@355688|Agaricomycetes incertae sedis	3PC7N@4751|Fungi		Family of unknown function (DUF6589)
MDBOrad1_00120	2EDKN@1|root,2SJ72@2759|Eukaryota,3AGPT@33154|Opisthokonta,3PC7N@4751|Fungi,3V3SE@5204|Basidiomycota,226V1@155619|Agaricomycetes,3W8AF@5338|Agaricales	3PC7N@4751|Fungi
MDBOrad1_00121	COG0696@1|root,KOG1914@2759|Eukaryota,38B6X@33154|Opisthokonta,3NV0B@4751|Fungi,3UZYX@5204|Basidiomycota,228CR@155619|Agaricomycetes,3W47A@5338|Agaricales	3NV0B@4751|Fungi	RecName: Full=mRNA 3'-end-processing protein RNA14 [Ustilago maydis 521]	Suppressor of forked protein (Suf)
MDBOrad1_00122	2E1TR@1|root,2S93V@2759|Eukaryota,3A8P7@33154|Opisthokonta,3P7JY@4751|Fungi,3V2E2@5204|Basidiomycota,228YE@155619|Agaricomycetes,3W6UQ@5338|Agaricales	3P7JY@4751|Fungi		F-box-like
MDBOrad1_00123	COG5147@1|root,KOG0048@2759|Eukaryota,38EUR@33154|Opisthokonta,3Q392@4751|Fungi,3VC6P@5204|Basidiomycota,22C4N@155619|Agaricomycetes,3W3QU@5338|Agaricales	3Q392@4751|Fungi	RecName: Full=Myb-like transcriptional regulator basR [Aspergillus nidulans FGSC A4]	Myb-like DNA-binding domain
MDBOrad1_00124
MDBOrad1_00125	295CN@1|root,2RCAK@2759|Eukaryota,3AYIQ@33154|Opisthokonta,3PJP1@4751|Fungi,3V91H@5204|Basidiomycota,22DP3@155619|Agaricomycetes,3W6W4@5338|Agaricales	3PJP1@4751|Fungi		F-box-like
MDBOrad1_00126	COG1204@1|root,KOG0951@2759|Eukaryota,3ARV9@33154|Opisthokonta,3NVEF@4751|Fungi,3UYR4@5204|Basidiomycota,225RD@155619|Agaricomycetes,3W64X@5338|Agaricales	3NVEF@4751|Fungi	RecName: Full=U5 small nuclear ribonucleoprotein 200 kDa helicase; AltName: Full=Activating signal cointegrator 1 complex subunit 3-like 1; AltName: Full=BRR2 homolog; AltName: Full=U5 snRNP-specific 200 kDa protein; Short=U5-200KD [Homo sapiens]
MDBOrad1_00127	COG1204@1|root,KOG0951@2759|Eukaryota,3ARV9@33154|Opisthokonta,3NVEF@4751|Fungi,3UYR4@5204|Basidiomycota,225RD@155619|Agaricomycetes,3W64X@5338|Agaricales	3NVEF@4751|Fungi	RecName: Full=Putative U5 small nuclear ribonucleoprotein 200 kDa helicase; AltName: Full=Protein lethal (3) 72Ab [Drosophila melanogaster]	Sec63 Brl domain		6
MDBOrad1_00128	2CV4F@1|root,2RR9P@2759|Eukaryota,38I7U@33154|Opisthokonta,3PK56@4751|Fungi,3V9Q9@5204|Basidiomycota,22CJS@155619|Agaricomycetes	3PK56@4751|Fungi				5
MDBOrad1_00129	COG2801@1|root,KOG0017@2759|Eukaryota,38F42@33154|Opisthokonta,3NVKU@4751|Fungi,3QP1S@4890|Ascomycota,20F71@147545|Eurotiomycetes,3S4J9@5042|Eurotiales	3NVKU@4751|Fungi	RecName: Full=Retrovirus-related Pol polyprotein from transposon 412; Includes: RecName: Full=Protease; Includes: RecName: Full=Reverse transcriptase; Includes: RecName: Full=Endonuclease [Drosophila melanogaster]	Reverse transcriptase (RNA-dependent DNA polymerase)		2
MDBOrad1_00130
MDBOrad1_00131	KOG3098@1|root,KOG3098@2759|Eukaryota,38F3W@33154|Opisthokonta,3NVA1@4751|Fungi,3V04D@5204|Basidiomycota,226Q3@155619|Agaricomycetes,3H0JH@355688|Agaricomycetes incertae sedis	3NVA1@4751|Fungi	RecName: Full=UNC93-like protein C922.05c [Schizosaccharomyces pombe 972h-]	Ion channel regulatory protein UNC-93		11
MDBOrad1_00132
MDBOrad1_00133
MDBOrad1_00134	2D1MD@1|root,2SIJR@2759|Eukaryota,3AGCX@33154|Opisthokonta,3PCRD@4751|Fungi,3V3M3@5204|Basidiomycota,227FJ@155619|Agaricomycetes,3W8W2@5338|Agaricales	3PCRD@4751|Fungi	RecName: Full=Peptidyl-Lys metalloendopeptidase; Short=MEP; AltName: Full=AmMEP; Flags: Precursor [Armillaria mellea]	Lysine-specific metallo-endopeptidase	SP(Sec/SPI)		yes
MDBOrad1_00135	COG0277@1|root,2QQWK@2759|Eukaryota,38BWH@33154|Opisthokonta,3NYDN@4751|Fungi,3V7DR@5204|Basidiomycota,229IK@155619|Agaricomycetes,3H6X6@355688|Agaricomycetes incertae sedis	3NYDN@4751|Fungi	RecName: Full=Uncharacterized FAD-linked oxidoreductase ARB_02478; Flags: Precursor [Trichophyton benhamiae CBS 112371]	FAD binding domain	SP(Sec/SPI)		yes
MDBOrad1_00136	COG5366@1|root,2QVHA@2759|Eukaryota,39S2T@33154|Opisthokonta,3NYMB@4751|Fungi,3UZWN@5204|Basidiomycota,2278M@155619|Agaricomycetes,3W65W@5338|Agaricales	3NYMB@4751|Fungi	RecName: Full=Post-transcriptional regulator MKT1; AltName: Full=Inactive endonuclease MKT1 [Cryptococcus neoformans var. grubii H99]	Temperature dependent protein affecting M2 dsRNA replication
MDBOrad1_00137	COG5052@1|root,KOG1725@2759|Eukaryota,39TRY@33154|Opisthokonta,3P44Z@4751|Fungi,3V1A0@5204|Basidiomycota,226H4@155619|Agaricomycetes,3W6S7@5338|Agaricales	3P44Z@4751|Fungi	RecName: Full=Protein YOP1 [Cryptococcus neoformans var. neoformans JEC21]_x0001_P0CN17.1 RecName: Full=Protein YOP1 [Cryptococcus neoformans var. neoformans B-3501A]	TB2/DP1, HVA22 family		3
MDBOrad1_00138	2E74D@1|root,2SDRX@2759|Eukaryota,3ACN1@33154|Opisthokonta,3P920@4751|Fungi,3V2XQ@5204|Basidiomycota,22B0A@155619|Agaricomycetes,3W8CZ@5338|Agaricales	3P920@4751|Fungi		Oligosaccharyltransferase subunit 5		2
MDBOrad1_00139
MDBOrad1_00140	COG0412@1|root,KOG3043@2759|Eukaryota,38HXU@33154|Opisthokonta,3NUGF@4751|Fungi,3V2DF@5204|Basidiomycota,227PS@155619|Agaricomycetes	3NUGF@4751|Fungi		Dienelactone hydrolase family	SP(Sec/SPI)		yes
MDBOrad1_00141	COG0308@1|root,KOG1047@2759|Eukaryota,38DQ5@33154|Opisthokonta,3NV5N@4751|Fungi,3UZY1@5204|Basidiomycota,226G3@155619|Agaricomycetes	3NV5N@4751|Fungi	RecName: Full=Leucine aminopeptidase 2; AltName: Full=Epoxide hydrolase; AltName: Full=Leukotriene A-4 hydrolase homolog; Short=LTA-4 hydrolase [Yarrowia lipolytica CLIB122]	Peptidase family M1 domain
MDBOrad1_00142	2CWQF@1|root,2RUZS@2759|Eukaryota,3AYE1@33154|Opisthokonta,3PJIQ@4751|Fungi,3V8WJ@5204|Basidiomycota,22AEF@155619|Agaricomycetes,3W9S2@5338|Agaricales	3PJIQ@4751|Fungi
MDBOrad1_00143
MDBOrad1_00144
MDBOrad1_00145	2EFAJ@1|root,2SKI5@2759|Eukaryota,3AITN@33154|Opisthokonta,3PCH3@4751|Fungi,3V3MG@5204|Basidiomycota,226ZH@155619|Agaricomycetes,3H3I0@355688|Agaricomycetes incertae sedis	3PCH3@4751|Fungi
MDBOrad1_00146	2EFAJ@1|root,2SKI5@2759|Eukaryota,3AITN@33154|Opisthokonta,3PCH3@4751|Fungi,3V3MG@5204|Basidiomycota,226ZH@155619|Agaricomycetes,3W8SW@5338|Agaricales	3PCH3@4751|Fungi
MDBOrad1_00147	COG0636@1|root,KOG0232@2759|Eukaryota,3A1YV@33154|Opisthokonta,3P3B0@4751|Fungi,3V0N3@5204|Basidiomycota,2295C@155619|Agaricomycetes,3W6SS@5338|Agaricales	3P3B0@4751|Fungi	RecName: Full=V-type proton ATPase subunit c'; Short=V-ATPase subunit c'; AltName: Full=Proteolipid protein VMA11; AltName: Full=V-type proton ATPase 16 kDa proteolipid subunit 2; Short=V-ATPase 16 kDa proteolipid subunit 2; AltName: Full=Vacuolar proton pump 16 kDa proteolipid subunit 2; AltName: Full=Vacuolar proton pump c' subunit [Eremothecium gossypii ATCC 10895]	ATP synthase subunit C		4
MDBOrad1_00148	COG0097@1|root,KOG3254@2759|Eukaryota,39WCS@33154|Opisthokonta,3NUY2@4751|Fungi,3V12U@5204|Basidiomycota,227CD@155619|Agaricomycetes,3W6VV@5338|Agaricales	3NUY2@4751|Fungi	RecName: Full=50S ribosomal protein L6 [Cupriavidus necator H16]	Ribosomal protein L6
MDBOrad1_00149
MDBOrad1_00150
MDBOrad1_00151	2EGH7@1|root,2SMF9@2759|Eukaryota,3AG1U@33154|Opisthokonta,3PA2U@4751|Fungi,3V45F@5204|Basidiomycota,225BM@155619|Agaricomycetes,3H0S9@355688|Agaricomycetes incertae sedis	3PA2U@4751|Fungi		F-box-like
MDBOrad1_00152	2D8Q2@1|root,2TB2I@2759|Eukaryota,3965I@33154|Opisthokonta,3Q16N@4751|Fungi	seed_ortholog@40492.XP_007306417.1|-		Protein kinase domain
MDBOrad1_00153	2CYZ2@1|root,2S7CA@2759|Eukaryota,39Z0I@33154|Opisthokonta,3P6XA@4751|Fungi,3V1RD@5204|Basidiomycota,22AJ4@155619|Agaricomycetes,3W9VH@5338|Agaricales	3P6XA@4751|Fungi	RecName: Full=Copper-dependent transcription factor 1 [Cryptococcus neoformans var. grubii H99]	Copper fist DNA binding domain
MDBOrad1_00154	2CP8U@1|root,2R0WE@2759|Eukaryota,3AY2R@33154|Opisthokonta,3PJ7Y@4751|Fungi,3V8I1@5204|Basidiomycota,22D6B@155619|Agaricomycetes,3W9F6@5338|Agaricales	3PJ7Y@4751|Fungi	RecName: Full=CUF1-dependent copper transporter 1; Short=Copper transporter 1 [Cryptococcus neoformans var. grubii H99]	Ctr copper transporter family		2
MDBOrad1_00155
MDBOrad1_00156
MDBOrad1_00157	2CYZ2@1|root,2S7CA@2759|Eukaryota,39Z0I@33154|Opisthokonta,3P6XA@4751|Fungi,3V1RD@5204|Basidiomycota,22AJ4@155619|Agaricomycetes,3W9VH@5338|Agaricales	3P6XA@4751|Fungi	RecName: Full=Copper-dependent transcription factor 1 [Cryptococcus neoformans var. grubii H99]	Copper fist DNA binding domain
MDBOrad1_00158
MDBOrad1_00159	2CYZ2@1|root,2S7CA@2759|Eukaryota,39Z0I@33154|Opisthokonta,3P6XA@4751|Fungi,3V1RD@5204|Basidiomycota,22AJ4@155619|Agaricomycetes,3W9VH@5338|Agaricales	3P6XA@4751|Fungi	RecName: Full=Copper-dependent transcription factor 1 [Cryptococcus neoformans var. grubii H99]	Copper fist DNA binding domain
MDBOrad1_00160	2CP8U@1|root,2R0WE@2759|Eukaryota,3AY2R@33154|Opisthokonta,3PJ7Y@4751|Fungi,3V8I1@5204|Basidiomycota,22D6B@155619|Agaricomycetes,3W9F6@5338|Agaricales	3PJ7Y@4751|Fungi	RecName: Full=CUF1-dependent copper transporter 1; Short=Copper transporter 1 [Cryptococcus neoformans var. grubii H99]	Ctr copper transporter family		2
MDBOrad1_00161	KOG0039@1|root,KOG0039@2759|Eukaryota,38H8W@33154|Opisthokonta,3NW8E@4751|Fungi,3V41S@5204|Basidiomycota,22BE3@155619|Agaricomycetes	3NW8E@4751|Fungi	RecName: Full=Ferric/cupric reductase transmembrane component 7; AltName: Full=Ferric-chelate reductase 7 [Saccharomyces cerevisiae S288C]	FAD-binding domain		6
MDBOrad1_00162	28IND@1|root,2QQZC@2759|Eukaryota,39VSX@33154|Opisthokonta,3NVZE@4751|Fungi,3V3SZ@5204|Basidiomycota,2252K@155619|Agaricomycetes,3W5HV@5338|Agaricales	3NVZE@4751|Fungi	RecName: Full=TPR and ankyrin repeat-containing protein 1; AltName: Full=Lupus brain antigen 1 [Mus musculus]	UvrD-like helicase C-terminal domain
MDBOrad1_00163				F-box-like
MDBOrad1_00164
MDBOrad1_00165			RecName: Full=Kinase suppressor of Ras B [Caenorhabditis elegans]	Protein kinase domain
MDBOrad1_00166	2D42J@1|root,2STM7@2759|Eukaryota,3AQXF@33154|Opisthokonta,3PGAZ@4751|Fungi,3V699@5204|Basidiomycota,22CGZ@155619|Agaricomycetes	3PGAZ@4751|Fungi		F-box-like
MDBOrad1_00167	COG5078@1|root,KOG0427@2759|Eukaryota,38BW8@33154|Opisthokonta,3P2QX@4751|Fungi,3V0NN@5204|Basidiomycota,2295U@155619|Agaricomycetes,3W6Z8@5338|Agaricales	3P2QX@4751|Fungi	RecName: Full=Ubiquitin-conjugating enzyme E2 W; AltName: Full=E2 ubiquitin-conjugating enzyme W; AltName: Full=N-terminal E2 ubiquitin-conjugating enzyme; AltName: Full=Ubiquitin carrier protein W; AltName: Full=Ubiquitin-protein ligase W [Xenopus tropicalis]	Ubiquitin-conjugating enzyme
MDBOrad1_00168	COG0667@1|root,KOG1575@2759|Eukaryota,38H5S@33154|Opisthokonta,3NVMZ@4751|Fungi,3V3TU@5204|Basidiomycota,227ZF@155619|Agaricomycetes,3H0FY@355688|Agaricomycetes incertae sedis	3NVMZ@4751|Fungi	RecName: Full=Aldo-keto reductase MYCFIDRAFT_87468; AltName: Full=PKS8-1 gene cluster protein MYCFIDRAFT_87468 [Pseudocercospora fijiensis CIRAD86]	Aldo/keto reductase family
MDBOrad1_00169	COG2124@1|root,KOG0157@2759|Eukaryota,38CHP@33154|Opisthokonta,3PCWA@4751|Fungi,3V4DM@5204|Basidiomycota,228T0@155619|Agaricomycetes	3PCWA@4751|Fungi	RecName: Full=Cytochrome P450 monooxygenase 81 [Postia placenta Mad-698-R]	Cytochrome P450	SP(Sec/SPI)	1
MDBOrad1_00170	2D55Z@1|root,2SXGV@2759|Eukaryota,3AXJ8@33154|Opisthokonta,3PI4W@4751|Fungi,3V68R@5204|Basidiomycota,22B63@155619|Agaricomycetes,3W959@5338|Agaricales	3PI4W@4751|Fungi
MDBOrad1_00171	2CMRA@1|root,2QRJE@2759|Eukaryota,38CYS@33154|Opisthokonta,3NY99@4751|Fungi,3V38U@5204|Basidiomycota,229NV@155619|Agaricomycetes,3W5Y1@5338|Agaricales	3NY99@4751|Fungi	RecName: Full=Uncharacterized protein YOR389W; Flags: Precursor [Saccharomyces cerevisiae S288C]		SP(Sec/SPI)		yes
MDBOrad1_00172	2D42J@1|root,2STM7@2759|Eukaryota,3AQXF@33154|Opisthokonta,3PGAZ@4751|Fungi,3V699@5204|Basidiomycota,22CGZ@155619|Agaricomycetes	3PGAZ@4751|Fungi		F-box-like
MDBOrad1_00173	2CI44@1|root,2QQCT@2759|Eukaryota,3ABU8@33154|Opisthokonta,3P8PB@4751|Fungi,3V2UT@5204|Basidiomycota	2QQCT@2759|Eukaryota		Family of unknown function (DUF6535)		4
MDBOrad1_00174	COG5599@1|root,KOG0789@2759|Eukaryota,3AGYB@33154|Opisthokonta,3NW1A@4751|Fungi,3VCCZ@5204|Basidiomycota,224SN@155619|Agaricomycetes,3W5ZM@5338|Agaricales	3NW1A@4751|Fungi	RecName: Full=Tyrosine-protein phosphatase non-receptor type 6; AltName: Full=70Z-SHP; AltName: Full=Hematopoietic cell protein-tyrosine phosphatase; AltName: Full=PTPTY-42; AltName: Full=Protein-tyrosine phosphatase 1C; Short=PTP-1C; AltName: Full=SH-PTP1; Short=SHP-1 [Mus musculus]	Protein-tyrosine phosphatase
MDBOrad1_00175
MDBOrad1_00176
MDBOrad1_00177	2D55Z@1|root,2SXGV@2759|Eukaryota,3AXJ8@33154|Opisthokonta,3PI4W@4751|Fungi,3V68R@5204|Basidiomycota,22B63@155619|Agaricomycetes,3W959@5338|Agaricales	3PI4W@4751|Fungi
MDBOrad1_00178	COG0531@1|root,KOG1287@2759|Eukaryota,38BBK@33154|Opisthokonta,3NVPN@4751|Fungi,3UYE1@5204|Basidiomycota,2250I@155619|Agaricomycetes,3W8SN@5338|Agaricales	3NVPN@4751|Fungi	RecName: Full=High-affinity methionine permease [Saccharomyces cerevisiae S288C]	Amino acid permease		10
MDBOrad1_00179	2B3GC@1|root,2S0EY@2759|Eukaryota,3A5N3@33154|Opisthokonta,3P2AB@4751|Fungi,3V2DA@5204|Basidiomycota,22BNF@155619|Agaricomycetes,3W7N3@5338|Agaricales	3P2AB@4751|Fungi		Beta-lactamase	SP(Sec/SPI)		yes
MDBOrad1_00180				Family of unknown function (DUF6699)
MDBOrad1_00181	COG0477@1|root,KOG2533@2759|Eukaryota,39S9F@33154|Opisthokonta,3NUGM@4751|Fungi,3QJMV@4890|Ascomycota,20GIY@147545|Eurotiomycetes,3SAIZ@5042|Eurotiales	3NUGM@4751|Fungi	RecName: Full=MFS transporter PfmaC; AltName: Full=Conidial pigment biosynthesis cluster protein B [Pestalotiopsis fici W106-1]	Major Facilitator Superfamily		10
MDBOrad1_00182	2D19Q@1|root,2SH9U@2759|Eukaryota,39VRH@33154|Opisthokonta,3P11P@4751|Fungi,3V3HD@5204|Basidiomycota,227IR@155619|Agaricomycetes	3P11P@4751|Fungi	RecName: Full=Putative Rieske 2Fe-2S iron-sulfur protein YhfW [Bacillus subtilis subsp. subtilis str. 168]	FAD dependent oxidoreductase
MDBOrad1_00183	2EI8I@1|root,2SNQJ@2759|Eukaryota,3AKC3@33154|Opisthokonta,3PDB6@4751|Fungi,3V59I@5204|Basidiomycota,22BWU@155619|Agaricomycetes,3W8TB@5338|Agaricales	3PDB6@4751|Fungi		Family of unknown function (DUF6535)		5
MDBOrad1_00184	2CI44@1|root,2QQCT@2759|Eukaryota,3ABU8@33154|Opisthokonta,3P8PB@4751|Fungi,3V2UT@5204|Basidiomycota	2QQCT@2759|Eukaryota		Family of unknown function (DUF6535)		4
MDBOrad1_00185	2D42J@1|root,2STM7@2759|Eukaryota,3AQXF@33154|Opisthokonta,3PGAZ@4751|Fungi,3V699@5204|Basidiomycota,22CGZ@155619|Agaricomycetes	3PGAZ@4751|Fungi		F-box-like
MDBOrad1_00186	298F9@1|root,2RFFW@2759|Eukaryota,39Y86@33154|Opisthokonta,3NZZZ@4751|Fungi,3QT1P@4890|Ascomycota,214VD@147550|Sordariomycetes,3TKH3@5125|Hypocreales,1FT27@110618|Nectriaceae	3NZZZ@4751|Fungi
MDBOrad1_00187
MDBOrad1_00188
MDBOrad1_00189	2D42J@1|root,2STM7@2759|Eukaryota,3AQXF@33154|Opisthokonta,3PGAZ@4751|Fungi,3V699@5204|Basidiomycota,22CGZ@155619|Agaricomycetes	3PGAZ@4751|Fungi		F-box-like
MDBOrad1_00190	KOG2326@1|root,KOG2326@2759|Eukaryota,38H1Y@33154|Opisthokonta,3NWV8@4751|Fungi,3V0ZD@5204|Basidiomycota,226QT@155619|Agaricomycetes	3NWV8@4751|Fungi	RecName: Full=ATP-dependent DNA helicase II subunit 2; AltName: Full=ATP-dependent DNA helicase II subunit Ku80 [Yarrowia lipolytica CLIB122]	Ku70/Ku80 beta-barrel domain
MDBOrad1_00191
MDBOrad1_00192	COG0667@1|root,KOG1575@2759|Eukaryota,38B5K@33154|Opisthokonta,3NWH7@4751|Fungi,3UYSQ@5204|Basidiomycota,228AA@155619|Agaricomycetes,3W3RI@5338|Agaricales	3NWH7@4751|Fungi	RecName: Full=Aryl-alcohol dehydrogenase [NADP(+)]; Short=AAD [Phanerodontia chrysosporium]	Aldo/keto reductase family
MDBOrad1_00193
MDBOrad1_00194	COG0553@1|root,KOG0386@2759|Eukaryota,38FDR@33154|Opisthokonta,3NX7W@4751|Fungi,3UYM1@5204|Basidiomycota,227YU@155619|Agaricomycetes,3W4HT@5338|Agaricales	3NX7W@4751|Fungi	RecName: Full=Chromatin structure-remodeling complex subunit snf21; AltName: Full=ATP-dependent helicase snf21; AltName: Full=RSC complex subunit snf21 [Schizosaccharomyces pombe 972h-]	SNF2-related domain
MDBOrad1_00195	COG0596@1|root,KOG4178@2759|Eukaryota,3AJJR@33154|Opisthokonta,3PD6X@4751|Fungi,3VBWH@5204|Basidiomycota,22EZP@155619|Agaricomycetes,3H8Q8@355688|Agaricomycetes incertae sedis	3PD6X@4751|Fungi		alpha/beta hydrolase fold
MDBOrad1_00196
MDBOrad1_00197	2D55Z@1|root,2SXGV@2759|Eukaryota,3AXJ8@33154|Opisthokonta,3PI4W@4751|Fungi,3V68R@5204|Basidiomycota,22B63@155619|Agaricomycetes,3W959@5338|Agaricales	3PI4W@4751|Fungi
MDBOrad1_00198
MDBOrad1_00199	2D55Z@1|root,2SXGV@2759|Eukaryota,3AXJ8@33154|Opisthokonta,3PI4W@4751|Fungi,3V68R@5204|Basidiomycota,22B63@155619|Agaricomycetes,3W959@5338|Agaricales	3PI4W@4751|Fungi
MDBOrad1_00200
MDBOrad1_00201	2CSJD@1|root,2RC5V@2759|Eukaryota,3AYF1@33154|Opisthokonta,3PJJM@4751|Fungi,3V8XM@5204|Basidiomycota,22DKE@155619|Agaricomycetes,3W9DC@5338|Agaricales	3PJJM@4751|Fungi		F-box-like
MDBOrad1_00202	2D55Z@1|root,2SXGV@2759|Eukaryota,3AXJ8@33154|Opisthokonta,3PI4W@4751|Fungi,3V68R@5204|Basidiomycota,22B63@155619|Agaricomycetes,3W959@5338|Agaricales	3PI4W@4751|Fungi
MDBOrad1_00203	2D55Z@1|root,2SXGV@2759|Eukaryota,3AXJ8@33154|Opisthokonta,3PI4W@4751|Fungi,3V68R@5204|Basidiomycota,22B63@155619|Agaricomycetes,3W959@5338|Agaricales	3PI4W@4751|Fungi
MDBOrad1_00204	2F11A@1|root,2T23V@2759|Eukaryota,3ATC7@33154|Opisthokonta,3PH91@4751|Fungi,3V79M@5204|Basidiomycota,22DSP@155619|Agaricomycetes,3W8I2@5338|Agaricales	3PH91@4751|Fungi
MDBOrad1_00205
MDBOrad1_00206
MDBOrad1_00207	2CVNZ@1|root,2RSEK@2759|Eukaryota,39KVG@33154|Opisthokonta,3Q593@4751|Fungi,3V7CA@5204|Basidiomycota,22AJI@155619|Agaricomycetes,3H7AA@355688|Agaricomycetes incertae sedis	3Q593@4751|Fungi		Reverse transcriptase (RNA-dependent DNA polymerase)
MDBOrad1_00208	2E6Z7@1|root,2SDME@2759|Eukaryota,3AQX1@33154|Opisthokonta,3PJP6@4751|Fungi,3V91U@5204|Basidiomycota,22750@155619|Agaricomycetes,3H1TF@355688|Agaricomycetes incertae sedis	3PJP6@4751|Fungi
MDBOrad1_00209	2D42J@1|root,2STM7@2759|Eukaryota,3AQXF@33154|Opisthokonta,3PGAZ@4751|Fungi,3V699@5204|Basidiomycota,22CGZ@155619|Agaricomycetes	3PGAZ@4751|Fungi		F-box-like
MDBOrad1_00210	2D55Z@1|root,2SXGV@2759|Eukaryota,3AXJ8@33154|Opisthokonta,3PI4W@4751|Fungi,3V68R@5204|Basidiomycota,22B63@155619|Agaricomycetes,3W959@5338|Agaricales	3PI4W@4751|Fungi
MDBOrad1_00211	28UI5@1|root,2R18Z@2759|Eukaryota,3AYTW@33154|Opisthokonta,3PJXF@4751|Fungi,3V9CF@5204|Basidiomycota,22B71@155619|Agaricomycetes,3H7NX@355688|Agaricomycetes incertae sedis	3PJXF@4751|Fungi
MDBOrad1_00212	2CI44@1|root,2QQCT@2759|Eukaryota,3ABU8@33154|Opisthokonta,3P8PB@4751|Fungi,3V2UT@5204|Basidiomycota	2QQCT@2759|Eukaryota		Family of unknown function (DUF6535)		4
MDBOrad1_00213	2EI8I@1|root,2SNQJ@2759|Eukaryota,3AKC3@33154|Opisthokonta,3PDB6@4751|Fungi,3V59I@5204|Basidiomycota,22BWU@155619|Agaricomycetes,3W8TB@5338|Agaricales	3PDB6@4751|Fungi		Family of unknown function (DUF6535)		5
MDBOrad1_00214	2EI8I@1|root,2SNQJ@2759|Eukaryota,3AKC3@33154|Opisthokonta,3PDB6@4751|Fungi,3V59I@5204|Basidiomycota,22BWU@155619|Agaricomycetes,3W8TB@5338|Agaricales	3PDB6@4751|Fungi		Family of unknown function (DUF6535)		5
MDBOrad1_00215				OTT_1508-like deaminase
MDBOrad1_00216	COG0003@1|root,KOG2825@2759|Eukaryota,38BC4@33154|Opisthokonta,3NX42@4751|Fungi,3UYN7@5204|Basidiomycota,227Q5@155619|Agaricomycetes,3W4PF@5338|Agaricales	3NX42@4751|Fungi	RecName: Full=ATPase GET3; AltName: Full=Arsenical pump-driving ATPase; AltName: Full=Arsenite-stimulated ATPase; AltName: Full=Golgi to ER traffic protein 3; AltName: Full=Guided entry of tail-anchored proteins 3 [Coprinopsis cinerea okayama7#130]	Anion-transporting ATPase
MDBOrad1_00217
MDBOrad1_00218				OTT_1508-like deaminase
MDBOrad1_00219	COG0003@1|root,KOG2825@2759|Eukaryota,38BC4@33154|Opisthokonta,3NX42@4751|Fungi,3UYN7@5204|Basidiomycota,227Q5@155619|Agaricomycetes,3W4PF@5338|Agaricales	3NX42@4751|Fungi	RecName: Full=ATPase GET3; AltName: Full=Arsenical pump-driving ATPase; AltName: Full=Arsenite-stimulated ATPase; AltName: Full=Golgi to ER traffic protein 3; AltName: Full=Guided entry of tail-anchored proteins 3 [Coprinopsis cinerea okayama7#130]	Anion-transporting ATPase
MDBOrad1_00220	COG2801@1|root,KOG0017@2759|Eukaryota,38F42@33154|Opisthokonta,3NVKU@4751|Fungi,3UXZ9@5204|Basidiomycota,2286X@155619|Agaricomycetes,3H7YX@355688|Agaricomycetes incertae sedis	3NVKU@4751|Fungi	RecName: Full=Retrovirus-related Pol polyprotein from transposon 17.6; Includes: RecName: Full=Protease; Includes: RecName: Full=Reverse transcriptase; Includes: RecName: Full=Endonuclease [Drosophila melanogaster]	RNase H-like domain found in reverse transcriptase
MDBOrad1_00221	KOG0615@1|root,KOG0615@2759|Eukaryota,39S4T@33154|Opisthokonta,3P05V@4751|Fungi,3QTR4@4890|Ascomycota,2188G@147550|Sordariomycetes,3TQJA@5125|Hypocreales,3U3J7@5129|Hypocreaceae	3P05V@4751|Fungi		AAA ATPase domain
MDBOrad1_00222
MDBOrad1_00223	2A4I1@1|root,2RY7K@2759|Eukaryota,3A134@33154|Opisthokonta,3P2NI@4751|Fungi,3V0MB@5204|Basidiomycota,22989@155619|Agaricomycetes	3P2NI@4751|Fungi		Family of unknown function (DUF6534)		6
MDBOrad1_00224	COG0474@1|root,KOG0206@2759|Eukaryota,38BZ2@33154|Opisthokonta,3NWQ9@4751|Fungi,3UZTI@5204|Basidiomycota,228E0@155619|Agaricomycetes,3W691@5338|Agaricales	3NWQ9@4751|Fungi	RecName: Full=Putative phospholipid-transporting ATPase C24B11.12c [Schizosaccharomyces pombe 972h-]	Phospholipid-translocating P-type ATPase C-terminal		10
MDBOrad1_00225
MDBOrad1_00226	2CV4F@1|root,2RR9P@2759|Eukaryota,38I7U@33154|Opisthokonta,3PK56@4751|Fungi,3V9Q9@5204|Basidiomycota,22CJS@155619|Agaricomycetes	3PK56@4751|Fungi				6
MDBOrad1_00227	2EJXB@1|root,2SPZ7@2759|Eukaryota,3A3PB@33154|Opisthokonta,3P3WX@4751|Fungi,3QVW3@4890|Ascomycota,20G49@147545|Eurotiomycetes,3MWQN@451870|Chaetothyriomycetidae	3P3WX@4751|Fungi
MDBOrad1_00228	2CV4F@1|root,2RR9P@2759|Eukaryota,38I7U@33154|Opisthokonta,3PK56@4751|Fungi,3V9Q9@5204|Basidiomycota,22CJS@155619|Agaricomycetes	3PK56@4751|Fungi				7
MDBOrad1_00229					SP(Sec/SPI)	4
MDBOrad1_00230	2EPP4@1|root,2SSUG@2759|Eukaryota,38Q83@33154|Opisthokonta,3PFSB@4751|Fungi,3V6H5@5204|Basidiomycota,22DBR@155619|Agaricomycetes,3W79K@5338|Agaricales	3PFSB@4751|Fungi
MDBOrad1_00231	COG5046@1|root,KOG3104@2759|Eukaryota,38HBA@33154|Opisthokonta,3Q18F@4751|Fungi,3V743@5204|Basidiomycota,22E6J@155619|Agaricomycetes	3Q18F@4751|Fungi		Family of unknown function (DUF6533)		6
MDBOrad1_00232	2EB4C@1|root,2SH9F@2759|Eukaryota,3AHG7@33154|Opisthokonta,3PCTA@4751|Fungi,3V4AB@5204|Basidiomycota,22C8I@155619|Agaricomycetes,3W8YZ@5338|Agaricales	3PCTA@4751|Fungi				7
MDBOrad1_00233
MDBOrad1_00234	COG0457@1|root,KOG1124@2759|Eukaryota,38CAZ@33154|Opisthokonta,3NVJD@4751|Fungi,3UZBE@5204|Basidiomycota,226V0@155619|Agaricomycetes,3W68J@5338|Agaricales	3NVJD@4751|Fungi	RecName: Full=General transcriptional corepressor trfA [Dictyostelium discoideum]	Tetratricopeptide repeat
MDBOrad1_00235	COG5085@1|root,KOG4503@2759|Eukaryota,39VFP@33154|Opisthokonta,3P574@4751|Fungi,3V1UX@5204|Basidiomycota,22620@155619|Agaricomycetes,3W31G@5338|Agaricales	3P574@4751|Fungi		Di-sulfide bridge nucleocytoplasmic transport domain		2
MDBOrad1_00236	COG0740@1|root,KOG0840@2759|Eukaryota,38PE0@33154|Opisthokonta,3P040@4751|Fungi,3V0DG@5204|Basidiomycota,225EB@155619|Agaricomycetes,3W5XT@5338|Agaricales	3P040@4751|Fungi	RecName: Full=ATP-dependent Clp protease proteolytic subunit 2, mitochondrial; AltName: Full=ATP-dependent Clp protease proteolytic subunit 1, mitochondrial; AltName: Full=Endopeptidase ClpP2; AltName: Full=nClpP7; Flags: Precursor [Arabidopsis thaliana]	Clp protease
MDBOrad1_00237	2C7TB@1|root,2SZ7W@2759|Eukaryota,3AM46@33154|Opisthokonta,3PHT4@4751|Fungi,3V6ND@5204|Basidiomycota,229R6@155619|Agaricomycetes,3H5B5@355688|Agaricomycetes incertae sedis	3PHT4@4751|Fungi			SP(Sec/SPI)	1
MDBOrad1_00238	2CV4F@1|root,2RR9P@2759|Eukaryota,38I7U@33154|Opisthokonta,3PK56@4751|Fungi,3V9Q9@5204|Basidiomycota,22CJS@155619|Agaricomycetes	3PK56@4751|Fungi				6
MDBOrad1_00239	2CV4F@1|root,2RR9P@2759|Eukaryota,38I7U@33154|Opisthokonta,3PK56@4751|Fungi,3V9Q9@5204|Basidiomycota,22CJS@155619|Agaricomycetes	3PK56@4751|Fungi				6
MDBOrad1_00240	2CV4F@1|root,2RR9P@2759|Eukaryota,38I7U@33154|Opisthokonta,3PK56@4751|Fungi,3V9Q9@5204|Basidiomycota,22CJS@155619|Agaricomycetes	3PK56@4751|Fungi				7
MDBOrad1_00241	KOG4069@1|root,KOG4069@2759|Eukaryota,3A0NT@33154|Opisthokonta,3P7TX@4751|Fungi,3V1J0@5204|Basidiomycota,228YF@155619|Agaricomycetes,3W6V1@5338|Agaricales	3P7TX@4751|Fungi		Golgin subfamily A member 7/ERF4 family
MDBOrad1_00242	KOG4155@1|root,KOG4155@2759|Eukaryota,38CB9@33154|Opisthokonta,3NWRU@4751|Fungi,3V19P@5204|Basidiomycota,225VQ@155619|Agaricomycetes,3W6CD@5338|Agaricales	3NWRU@4751|Fungi	RecName: Full=AP-1-like transcription factor yap1; AltName: Full=BZIP domain-containing transcription factor yap1 [Cryptococcus neoformans var. grubii H99]	WD domain, G-beta repeat
MDBOrad1_00243	2CV4F@1|root,2RR9P@2759|Eukaryota,38I7U@33154|Opisthokonta,3PK56@4751|Fungi,3V9Q9@5204|Basidiomycota,22CJS@155619|Agaricomycetes	3PK56@4751|Fungi				7
MDBOrad1_00244	KOG3607@1|root,KOG3607@2759|Eukaryota,38B6W@33154|Opisthokonta,3NTZ6@4751|Fungi,3UZHA@5204|Basidiomycota,226Y3@155619|Agaricomycetes,3W3JR@5338|Agaricales	3NTZ6@4751|Fungi	RecName: Full=Disintegrin and metalloproteinase domain-containing protein B; Short=ADAM B; Flags: Precursor [Aspergillus fumigatus Af293]	Metallo-peptidase family M12	SP(Sec/SPI)	8
MDBOrad1_00245	2CN61@1|root,2QU23@2759|Eukaryota,391XD@33154|Opisthokonta,3NWY2@4751|Fungi,3VBS2@5204|Basidiomycota,22E38@155619|Agaricomycetes,3W9UN@5338|Agaricales	3NWY2@4751|Fungi	RecName: Full=Pathogenicity cluster 5 protein d; Flags: Precursor [Colletotrichum graminicola M1.001]		SP(Sec/SPI)		yes
MDBOrad1_00246	2C8EX@1|root,2SP7B@2759|Eukaryota,3APBM@33154|Opisthokonta,3PE70@4751|Fungi,3V5HP@5204|Basidiomycota,229TY@155619|Agaricomycetes,3W7QY@5338|Agaricales	3PE70@4751|Fungi
MDBOrad1_00247	COG0082@1|root,KOG4492@2759|Eukaryota,38EIY@33154|Opisthokonta,3NUJB@4751|Fungi,3UZFH@5204|Basidiomycota,225U5@155619|Agaricomycetes	3NUJB@4751|Fungi	RecName: Full=Chorismate synthase; AltName: Full=5-enolpyruvylshikimate-3-phosphate phospholyase [Schizosaccharomyces pombe 972h-]	Chorismate synthase
MDBOrad1_00248	COG0391@1|root,2QUXN@2759|Eukaryota,38GWW@33154|Opisthokonta,3NXK8@4751|Fungi,3UYE8@5204|Basidiomycota,225ZE@155619|Agaricomycetes,3W629@5338|Agaricales	3NXK8@4751|Fungi	RecName: Full=Uncharacterized protein YNL011C [Saccharomyces cerevisiae S288C]	2-phospho-L-lactate transferase CofD
MDBOrad1_00249	2ESC0@1|root,2SUYB@2759|Eukaryota,3AT5J@33154|Opisthokonta,3PFJA@4751|Fungi,3V6BD@5204|Basidiomycota,22AK2@155619|Agaricomycetes,3H5R5@355688|Agaricomycetes incertae sedis	3PFJA@4751|Fungi
MDBOrad1_00250	2E13X@1|root,2S8GC@2759|Eukaryota,3AA6V@33154|Opisthokonta,3P83A@4751|Fungi,3V2NV@5204|Basidiomycota,229C8@155619|Agaricomycetes,3W8HH@5338|Agaricales	3P83A@4751|Fungi				4
MDBOrad1_00251	2EIVQ@1|root,2SP6Y@2759|Eukaryota,3AM7J@33154|Opisthokonta,3PE3X@4751|Fungi,3V5ES@5204|Basidiomycota,228XW@155619|Agaricomycetes,3W9QZ@5338|Agaricales	3PE3X@4751|Fungi			SP(Sec/SPI)	1
MDBOrad1_00252	COG0488@1|root,KOG0062@2759|Eukaryota,38FBM@33154|Opisthokonta,3NWE1@4751|Fungi,3UZ84@5204|Basidiomycota,225NF@155619|Agaricomycetes,3W5ZE@5338|Agaricales	3NWE1@4751|Fungi	RecName: Full=Uncharacterized ABC transporter ATP-binding protein C29A3.09c [Schizosaccharomyces pombe 972h-]	ABC transporter
MDBOrad1_00253	2C7TB@1|root,2SZ7W@2759|Eukaryota,3AM46@33154|Opisthokonta,3PHT4@4751|Fungi,3V6ND@5204|Basidiomycota,229R6@155619|Agaricomycetes,3H5B5@355688|Agaricomycetes incertae sedis	3PHT4@4751|Fungi			SP(Sec/SPI)	1
MDBOrad1_00254	COG1335@1|root,KOG4003@2759|Eukaryota,39V1V@33154|Opisthokonta,3NYNG@4751|Fungi,3QSWQ@4890|Ascomycota	3NYNG@4751|Fungi	RecName: Full=Nicotinamidase; AltName: Full=Nicotinamide deamidase; Short=NAMase [Saccharomyces cerevisiae S288C]	Isochorismatase family
MDBOrad1_00255	2ENV9@1|root,2SS6Y@2759|Eukaryota,3AP1Q@33154|Opisthokonta,3PF3T@4751|Fungi,3V5UU@5204|Basidiomycota,22AZ0@155619|Agaricomycetes,3W89I@5338|Agaricales	3PF3T@4751|Fungi				1
MDBOrad1_00256						1
MDBOrad1_00257	2D4IR@1|root,2SVAU@2759|Eukaryota,3AQU5@33154|Opisthokonta,3PFMV@4751|Fungi,3V67U@5204|Basidiomycota,22AQS@155619|Agaricomycetes,3W9PH@5338|Agaricales	3PFMV@4751|Fungi		Domain of unknown function (DUF6697)
MDBOrad1_00258
MDBOrad1_00259						1
MDBOrad1_00260						2
MDBOrad1_00261	COG0667@1|root,KOG1575@2759|Eukaryota,38B5K@33154|Opisthokonta,3NWH7@4751|Fungi,3UYSQ@5204|Basidiomycota,228AA@155619|Agaricomycetes	3NWH7@4751|Fungi	RecName: Full=Aryl-alcohol dehydrogenase [NADP(+)]; Short=AAD [Phanerodontia chrysosporium]	Aldo/keto reductase family
MDBOrad1_00262	2C7TB@1|root,2SZ7W@2759|Eukaryota,3AM46@33154|Opisthokonta,3PHT4@4751|Fungi,3V6ND@5204|Basidiomycota,229R6@155619|Agaricomycetes,3H5B5@355688|Agaricomycetes incertae sedis	3PHT4@4751|Fungi		Eukaryotic aspartyl protease	SP(Sec/SPI)	1
MDBOrad1_00263	2CYZP@1|root,2S7G9@2759|Eukaryota,3AAYA@33154|Opisthokonta,3P6ZU@4751|Fungi,3V2RT@5204|Basidiomycota,22998@155619|Agaricomycetes,3W739@5338|Agaricales	3P6ZU@4751|Fungi
MDBOrad1_00264	29J6P@1|root,2RSES@2759|Eukaryota,3AYGB@33154|Opisthokonta,3PJKV@4751|Fungi,3V8Z1@5204|Basidiomycota,22DMB@155619|Agaricomycetes,3W7I9@5338|Agaricales	3PJKV@4751|Fungi
MDBOrad1_00265	COG0187@1|root,KOG0355@2759|Eukaryota,38CPA@33154|Opisthokonta,3NWYX@4751|Fungi,3UZQE@5204|Basidiomycota,224M9@155619|Agaricomycetes,3W4QW@5338|Agaricales	3NWYX@4751|Fungi	RecName: Full=DNA topoisomerase 2; AltName: Full=DNA topoisomerase II [Penicillium chrysogenum]	DNA gyrase/topoisomerase IV, subunit A
MDBOrad1_00266	2D4IR@1|root,2SVAU@2759|Eukaryota,3AQU5@33154|Opisthokonta,3PFMV@4751|Fungi,3V67U@5204|Basidiomycota,22AQS@155619|Agaricomycetes,3W9PH@5338|Agaricales	3PFMV@4751|Fungi		Domain of unknown function (DUF6697)
MDBOrad1_00267						1
MDBOrad1_00268	2ENV9@1|root,2SS6Y@2759|Eukaryota,3AP1Q@33154|Opisthokonta,3PF3T@4751|Fungi,3V5UU@5204|Basidiomycota,22AZ0@155619|Agaricomycetes,3W89I@5338|Agaricales	3PF3T@4751|Fungi
MDBOrad1_00269						1
MDBOrad1_00270	COG2072@1|root,KOG1399@2759|Eukaryota,38F1Q@33154|Opisthokonta,3NWM1@4751|Fungi,3V3US@5204|Basidiomycota,22BUP@155619|Agaricomycetes,3W8N4@5338|Agaricales	3NWM1@4751|Fungi	RecName: Full=Flavin-containing monooxygenase FMO GS-OX3; AltName: Full=Flavin-monooxygenase glucosinolate S-oxygenase 3 [Arabidopsis thaliana]	Flavin-binding monooxygenase-like
MDBOrad1_00271
MDBOrad1_00272
MDBOrad1_00273	COG0187@1|root,KOG0355@2759|Eukaryota,38CPA@33154|Opisthokonta,3NWYX@4751|Fungi,3UZQE@5204|Basidiomycota,224M9@155619|Agaricomycetes,3H2XC@355688|Agaricomycetes incertae sedis	3NWYX@4751|Fungi
MDBOrad1_00274	COG0187@1|root,KOG0355@2759|Eukaryota,38CPA@33154|Opisthokonta,3NWYX@4751|Fungi	3NWYX@4751|Fungi	RecName: Full=DNA topoisomerase 2; AltName: Full=DNA topoisomerase II [Schizosaccharomyces pombe 972h-]
MDBOrad1_00275	COG2072@1|root,KOG1399@2759|Eukaryota,38F1Q@33154|Opisthokonta,3NWM1@4751|Fungi,3V3US@5204|Basidiomycota,22BUP@155619|Agaricomycetes,3W8N4@5338|Agaricales	3NWM1@4751|Fungi	RecName: Full=Flavin-containing monooxygenase FMO GS-OX3; AltName: Full=Flavin-monooxygenase glucosinolate S-oxygenase 3 [Arabidopsis thaliana]	Flavin-binding monooxygenase-like
MDBOrad1_00276						1
MDBOrad1_00277	COG2072@1|root,KOG1399@2759|Eukaryota,38F1Q@33154|Opisthokonta,3NWM1@4751|Fungi,3V3US@5204|Basidiomycota,22BUP@155619|Agaricomycetes,3W8N4@5338|Agaricales	3NWM1@4751|Fungi	RecName: Full=Dimethylaniline monooxygenase [N-oxide-forming] 2; AltName: Full=Dimethylaniline oxidase 2; AltName: Full=Pulmonary flavin-containing monooxygenase 2; Short=FMO 2 [Mus musculus]	Flavin-binding monooxygenase-like
MDBOrad1_00278	COG2072@1|root,KOG1399@2759|Eukaryota,38F1Q@33154|Opisthokonta,3NWM1@4751|Fungi,3V3US@5204|Basidiomycota,22BUP@155619|Agaricomycetes,3W8N4@5338|Agaricales	3NWM1@4751|Fungi
MDBOrad1_00279						1
MDBOrad1_00280
MDBOrad1_00281	2CE05@1|root,2SZRQ@2759|Eukaryota,3ATQ6@33154|Opisthokonta,3PGVA@4751|Fungi,3V72W@5204|Basidiomycota,22CJD@155619|Agaricomycetes	seed_ortholog@40492.XP_007304467.1|-
MDBOrad1_00282	2CPCB@1|root,2R1A8@2759|Eukaryota,3AYUP@33154|Opisthokonta,3PJYA@4751|Fungi,3V9DB@5204|Basidiomycota,22BBS@155619|Agaricomycetes,3H6I5@355688|Agaricomycetes incertae sedis	3PJYA@4751|Fungi				4
MDBOrad1_00283	2EEI7@1|root,2SJXV@2759|Eukaryota,3AEQF@33154|Opisthokonta,3PB6V@4751|Fungi,3V3A3@5204|Basidiomycota,227Q7@155619|Agaricomycetes,3W93P@5338|Agaricales	3PB6V@4751|Fungi			SP(Sec/SPI)		yes
MDBOrad1_00284	KOG0007@1|root,KOG0007@2759|Eukaryota,38BQF@33154|Opisthokonta,3NV6A@4751|Fungi,3UZ9H@5204|Basidiomycota,224VS@155619|Agaricomycetes	3NV6A@4751|Fungi		Surp module		2
MDBOrad1_00285	2EHBS@1|root,2SN1A@2759|Eukaryota,3AK3J@33154|Opisthokonta,3PDBZ@4751|Fungi,3V580@5204|Basidiomycota,2295Q@155619|Agaricomycetes	3PDBZ@4751|Fungi
MDBOrad1_00286	COG2801@1|root,KOG0017@2759|Eukaryota,38F42@33154|Opisthokonta,3NVKU@4751|Fungi,3QP1S@4890|Ascomycota,20F71@147545|Eurotiomycetes,3S4J9@5042|Eurotiales	3NVKU@4751|Fungi	RecName: Full=Retrovirus-related Pol polyprotein from transposon opus; Includes: RecName: Full=Protease; Includes: RecName: Full=Reverse transcriptase; Includes: RecName: Full=Endonuclease [Drosophila melanogaster]	Reverse transcriptase (RNA-dependent DNA polymerase)
MDBOrad1_00287
MDBOrad1_00288
MDBOrad1_00289
MDBOrad1_00290
MDBOrad1_00291				Tetratricopeptide repeat
MDBOrad1_00292
MDBOrad1_00293	COG2072@1|root,KOG1399@2759|Eukaryota,38F1Q@33154|Opisthokonta,3NWM1@4751|Fungi,3V3US@5204|Basidiomycota,22BUP@155619|Agaricomycetes,3W8N4@5338|Agaricales	3NWM1@4751|Fungi
MDBOrad1_00294						1
MDBOrad1_00295						1
MDBOrad1_00296	COG2072@1|root,KOG1399@2759|Eukaryota,38F1Q@33154|Opisthokonta,3NWM1@4751|Fungi,3V3US@5204|Basidiomycota,22BUP@155619|Agaricomycetes,3W8N4@5338|Agaricales	3NWM1@4751|Fungi		Flavin-binding monooxygenase-like
MDBOrad1_00297						1
MDBOrad1_00298
MDBOrad1_00299	2CE05@1|root,2SZRQ@2759|Eukaryota,3ATQ6@33154|Opisthokonta,3PGVA@4751|Fungi,3V72W@5204|Basidiomycota,22CJD@155619|Agaricomycetes	seed_ortholog@40492.XP_007304467.1|-
MDBOrad1_00300	2CPCB@1|root,2R1A8@2759|Eukaryota,3AYUP@33154|Opisthokonta,3PJYA@4751|Fungi,3V9DB@5204|Basidiomycota,22BBS@155619|Agaricomycetes,3H6I5@355688|Agaricomycetes incertae sedis	3PJYA@4751|Fungi				4
MDBOrad1_00301
MDBOrad1_00302	293S4@1|root,2RAP2@2759|Eukaryota,3AX37@33154|Opisthokonta,3Q2VY@4751|Fungi,3V6BT@5204|Basidiomycota,22DGH@155619|Agaricomycetes,3W8IJ@5338|Agaricales	3Q2VY@4751|Fungi
MDBOrad1_00303
MDBOrad1_00304	2D4IR@1|root,2SVAU@2759|Eukaryota,3AQU5@33154|Opisthokonta,3PFMV@4751|Fungi,3V67U@5204|Basidiomycota,22AQS@155619|Agaricomycetes,3W9PH@5338|Agaricales	3PFMV@4751|Fungi		Domain of unknown function (DUF6697)
MDBOrad1_00305
MDBOrad1_00306	2D4IR@1|root,2SVAU@2759|Eukaryota,3AQU5@33154|Opisthokonta,3PFMV@4751|Fungi,3V67U@5204|Basidiomycota,22AQS@155619|Agaricomycetes,3W9PH@5338|Agaricales	3PFMV@4751|Fungi		Domain of unknown function (DUF6697)
MDBOrad1_00307	2D8Q2@1|root,2TB2I@2759|Eukaryota,3965I@33154|Opisthokonta,3Q16N@4751|Fungi	seed_ortholog@40492.XP_007311901.1|-		Protein kinase domain
MDBOrad1_00308	COG0465@1|root,KOG0743@2759|Eukaryota,39U06@33154|Opisthokonta,3NX6C@4751|Fungi,3V41A@5204|Basidiomycota,226NM@155619|Agaricomycetes,3W5B7@5338|Agaricales	3NX6C@4751|Fungi	RecName: Full=Probable mitochondrial chaperone BCS1-B; AltName: Full=BCS1-like protein 2 [Dictyostelium discoideum]	BCS1 N terminal
MDBOrad1_00309
MDBOrad1_00310
MDBOrad1_00311
MDBOrad1_00312						1
MDBOrad1_00313
MDBOrad1_00314						1
MDBOrad1_00315						1
MDBOrad1_00316
MDBOrad1_00317						1
MDBOrad1_00318	COG2072@1|root,KOG1399@2759|Eukaryota,38F1Q@33154|Opisthokonta,3NWM1@4751|Fungi,3V3US@5204|Basidiomycota,22BUP@155619|Agaricomycetes,3W8N4@5338|Agaricales	3NWM1@4751|Fungi	RecName: Full=Flavin-containing monooxygenase FMO GS-OX3; AltName: Full=Flavin-monooxygenase glucosinolate S-oxygenase 3 [Arabidopsis thaliana]	Flavin-binding monooxygenase-like
MDBOrad1_00319	COG0187@1|root,KOG0355@2759|Eukaryota,38CPA@33154|Opisthokonta,3NWYX@4751|Fungi,3UZQE@5204|Basidiomycota,224M9@155619|Agaricomycetes	3NWYX@4751|Fungi	RecName: Full=DNA topoisomerase 2; AltName: Full=DNA topoisomerase II [Penicillium chrysogenum]
MDBOrad1_00320
MDBOrad1_00321
MDBOrad1_00322	COG0654@1|root,KOG2614@2759|Eukaryota,3AF9T@33154|Opisthokonta,3PAIE@4751|Fungi,3QNFQ@4890|Ascomycota,217ME@147550|Sordariomycetes,3TUDW@5125|Hypocreales,1FZKW@110618|Nectriaceae	3PAIE@4751|Fungi				1
MDBOrad1_00323
MDBOrad1_00324	COG2124@1|root,KOG0158@2759|Eukaryota,3AGAY@33154|Opisthokonta,3PCCU@4751|Fungi,3V4IK@5204|Basidiomycota,22BJQ@155619|Agaricomycetes,3H6WP@355688|Agaricomycetes incertae sedis	3PCCU@4751|Fungi	RecName: Full=Cytochrome P450 monooxygenase nodW; AltName: Full=Nodulisporic acid biosynthesis cluster protein W [Hypoxylon pulicicidum]	Cytochrome P450		2
MDBOrad1_00325	COG2072@1|root,KOG1399@2759|Eukaryota,39UT7@33154|Opisthokonta,3NYC2@4751|Fungi,3V4VT@5204|Basidiomycota,229QW@155619|Agaricomycetes,3H50J@355688|Agaricomycetes incertae sedis	3NYC2@4751|Fungi		Pyridine nucleotide-disulphide oxidoreductase
MDBOrad1_00326	2ERWF@1|root,2SUK5@2759|Eukaryota,3ARS5@33154|Opisthokonta,3PGGJ@4751|Fungi,3V6IS@5204|Basidiomycota,22ADV@155619|Agaricomycetes,3H7D6@355688|Agaricomycetes incertae sedis	3PGGJ@4751|Fungi		Mycotoxin biosynthesis protein UstYa		1
MDBOrad1_00327	2EJP6@1|root,2SPTB@2759|Eukaryota,3AMV0@33154|Opisthokonta,3PDV1@4751|Fungi,3V5F1@5204|Basidiomycota,22A6G@155619|Agaricomycetes,3H5Y3@355688|Agaricomycetes incertae sedis	3PDV1@4751|Fungi		Mycotoxin biosynthesis protein UstYa		1
MDBOrad1_00328	KOG0254@1|root,KOG0254@2759|Eukaryota,3970G@33154|Opisthokonta,3NW5M@4751|Fungi,3UZRW@5204|Basidiomycota	3NW5M@4751|Fungi	RecName: Full=MFS-type efflux pump LUC4; AltName: Full=Lucilactaene biosynthesis cluster protein 4 [Fusarium sp.]	Major Facilitator Superfamily		13
MDBOrad1_00329	2EJP6@1|root,2SPTB@2759|Eukaryota,3AMV0@33154|Opisthokonta,3PDV1@4751|Fungi,3V5F1@5204|Basidiomycota,22A6G@155619|Agaricomycetes,3H5Y3@355688|Agaricomycetes incertae sedis	3PDV1@4751|Fungi		Mycotoxin biosynthesis protein UstYa	SP(Sec/SPI)	1
MDBOrad1_00330	2EMX5@1|root,2SRG8@2759|Eukaryota,3ANE2@33154|Opisthokonta,3PF8S@4751|Fungi,3V61Q@5204|Basidiomycota,22AUN@155619|Agaricomycetes,3H6FE@355688|Agaricomycetes incertae sedis	3PF8S@4751|Fungi		Ubiquitin 3 binding protein But2 C-terminal domain		1
MDBOrad1_00331	2CSUE@1|root,2RD5Q@2759|Eukaryota,38IDG@33154|Opisthokonta,3PKAJ@4751|Fungi,3V9WF@5204|Basidiomycota,22CWY@155619|Agaricomycetes	3PKAJ@4751|Fungi		Family of unknown function (DUF6534)		7
MDBOrad1_00332	KOG2210@1|root,KOG2210@2759|Eukaryota,38CEM@33154|Opisthokonta,3NUQ2@4751|Fungi,3UZ2Y@5204|Basidiomycota,226N9@155619|Agaricomycetes,3W6E1@5338|Agaricales	3NUQ2@4751|Fungi	RecName: Full=Oxysterol-binding protein homolog C23B6.01c [Schizosaccharomyces pombe 972h-]	Oxysterol-binding protein
MDBOrad1_00333	2E78V@1|root,2SDVW@2759|Eukaryota,3ABU6@33154|Opisthokonta,3PC9D@4751|Fungi,3V3GU@5204|Basidiomycota,22EJR@155619|Agaricomycetes	3PC9D@4751|Fungi	RecName: Full=PAM2 domain-containing protein UPA2 [Ustilago maydis 521]
MDBOrad1_00334	COG0513@1|root,KOG0331@2759|Eukaryota,38GAK@33154|Opisthokonta,3NV0I@4751|Fungi,3UYX6@5204|Basidiomycota,224JT@155619|Agaricomycetes,3W5IG@5338|Agaricales	3NV0I@4751|Fungi	RecName: Full=ATP-dependent RNA helicase DBP3 [Cryptococcus neoformans var. neoformans JEC21]	DEAD/DEAH box helicase
MDBOrad1_00335	295BQ@1|root,2RC9N@2759|Eukaryota,3AYI3@33154|Opisthokonta,3PJNH@4751|Fungi,3V90X@5204|Basidiomycota,22CMB@155619|Agaricomycetes,3H7VX@355688|Agaricomycetes incertae sedis	3PJNH@4751|Fungi
MDBOrad1_00336	COG0513@1|root,KOG0331@2759|Eukaryota,38GAK@33154|Opisthokonta,3NV0I@4751|Fungi,3UYX6@5204|Basidiomycota,224JT@155619|Agaricomycetes,3W5IG@5338|Agaricales	3NV0I@4751|Fungi	RecName: Full=ATP-dependent RNA helicase DBP3 [Cryptococcus neoformans var. neoformans B-3501A]	Helicase conserved C-terminal domain	SP(Sec/SPI)		yes
MDBOrad1_00337	295BQ@1|root,2RC9N@2759|Eukaryota,3AYI3@33154|Opisthokonta,3PJNH@4751|Fungi,3V90X@5204|Basidiomycota,22CMB@155619|Agaricomycetes,3H7VX@355688|Agaricomycetes incertae sedis	3PJNH@4751|Fungi				1
MDBOrad1_00338	COG3938@1|root,2QRPF@2759|Eukaryota,38E8N@33154|Opisthokonta,3NZJB@4751|Fungi,3V6IQ@5204|Basidiomycota,227Y1@155619|Agaricomycetes	3NZJB@4751|Fungi	RecName: Full=Trans-L-3-hydroxyproline dehydratase; AltName: Full=Trans-3-hydroxy-L-proline dehydratase [Bos taurus]	Proline racemase
MDBOrad1_00339	COG0484@1|root,KOG0550@2759|Eukaryota,38CD1@33154|Opisthokonta,3NV1Y@4751|Fungi,3UY69@5204|Basidiomycota,228A9@155619|Agaricomycetes,3H0SI@355688|Agaricomycetes incertae sedis	3NV1Y@4751|Fungi	RecName: Full=DnaJ homolog subfamily C member 7 homolog [Schizosaccharomyces pombe 972h-]	Tetratricopeptide repeat
MDBOrad1_00340	COG0429@1|root,KOG1838@2759|Eukaryota,38D8H@33154|Opisthokonta,3NW0F@4751|Fungi,3V0IC@5204|Basidiomycota,225ZX@155619|Agaricomycetes,3W3ZG@5338|Agaricales	3NW0F@4751|Fungi	RecName: Full=Protein ABHD1; AltName: Full=Alpha/beta hydrolase domain-containing protein 1; Short=Abhydrolase domain-containing protein 1 [Bos taurus]	Alpha/beta hydrolase family
MDBOrad1_00341	2EPZR@1|root,2ST3A@2759|Eukaryota,3APK3@33154|Opisthokonta,3PIKN@4751|Fungi,3V729@5204|Basidiomycota,22CDS@155619|Agaricomycetes,3W963@5338|Agaricales	3PIKN@4751|Fungi				5
MDBOrad1_00342	COG0429@1|root,KOG1838@2759|Eukaryota,38D8H@33154|Opisthokonta,3NW0F@4751|Fungi,3V0IC@5204|Basidiomycota,225ZX@155619|Agaricomycetes,3W3ZG@5338|Agaricales	3NW0F@4751|Fungi	RecName: Full=Protein ABHD1; AltName: Full=Alpha/beta hydrolase domain-containing protein 1; Short=Abhydrolase domain-containing protein 1 [Bos taurus]
MDBOrad1_00343
MDBOrad1_00344	2EPZR@1|root,2ST3A@2759|Eukaryota,3APK3@33154|Opisthokonta,3PIKN@4751|Fungi,3V729@5204|Basidiomycota,22CDS@155619|Agaricomycetes,3W963@5338|Agaricales	3PIKN@4751|Fungi				6
MDBOrad1_00345	2EPZR@1|root,2ST3A@2759|Eukaryota,3APK3@33154|Opisthokonta,3PIKN@4751|Fungi,3V729@5204|Basidiomycota,22CDS@155619|Agaricomycetes,3W963@5338|Agaricales	3PIKN@4751|Fungi				8
MDBOrad1_00346	2EPZR@1|root,2ST3A@2759|Eukaryota,3APK3@33154|Opisthokonta,3PIKN@4751|Fungi,3V729@5204|Basidiomycota,22CDS@155619|Agaricomycetes,3W963@5338|Agaricales	3PIKN@4751|Fungi				7
MDBOrad1_00347	KOG3924@1|root,KOG3924@2759|Eukaryota,38BX3@33154|Opisthokonta,3NVIQ@4751|Fungi,3UZCE@5204|Basidiomycota,2268S@155619|Agaricomycetes,3W4AS@5338|Agaricales	3NVIQ@4751|Fungi	RecName: Full=Histone-lysine N-methyltransferase, H3 lysine-79 specific; AltName: Full=Histone H3-K79 methyltransferase; Short=H3-K79-HMTase [Coccidioides immitis RS]	Histone methylation protein DOT1
MDBOrad1_00348
MDBOrad1_00349
MDBOrad1_00350	KOG3924@1|root,KOG3924@2759|Eukaryota,38BX3@33154|Opisthokonta,3NVIQ@4751|Fungi,3UZCE@5204|Basidiomycota,2268S@155619|Agaricomycetes,3W4AS@5338|Agaricales	3NVIQ@4751|Fungi	RecName: Full=Histone-lysine N-methyltransferase, H3 lysine-79 specific; AltName: Full=Histone H3-K79 methyltransferase; Short=H3-K79-HMTase [Coccidioides immitis RS]	Histone methylation protein DOT1
MDBOrad1_00351
MDBOrad1_00352
MDBOrad1_00353
MDBOrad1_00354	KOG3924@1|root,KOG3924@2759|Eukaryota,38BX3@33154|Opisthokonta,3NVIQ@4751|Fungi,3UZCE@5204|Basidiomycota,2268S@155619|Agaricomycetes,3W4AS@5338|Agaricales	3NVIQ@4751|Fungi	RecName: Full=Histone-lysine N-methyltransferase, H3 lysine-79 specific; AltName: Full=Histone H3-K79 methyltransferase; Short=H3-K79-HMTase [Coccidioides immitis RS]	Histone methylation protein DOT1
MDBOrad1_00355						2
MDBOrad1_00356
MDBOrad1_00357
MDBOrad1_00358	KOG3924@1|root,KOG3924@2759|Eukaryota,38BX3@33154|Opisthokonta,3NVIQ@4751|Fungi,3UZCE@5204|Basidiomycota,2268S@155619|Agaricomycetes,3W4AS@5338|Agaricales	3NVIQ@4751|Fungi	RecName: Full=Histone-lysine N-methyltransferase, H3 lysine-79 specific; AltName: Full=Histone H3-K79 methyltransferase; Short=H3-K79-HMTase [Coccidioides immitis RS]	Histone methylation protein DOT1
MDBOrad1_00359
MDBOrad1_00360
MDBOrad1_00361	KOG3924@1|root,KOG3924@2759|Eukaryota,38BX3@33154|Opisthokonta,3NVIQ@4751|Fungi,3UZCE@5204|Basidiomycota,2268S@155619|Agaricomycetes,3W4AS@5338|Agaricales	3NVIQ@4751|Fungi	RecName: Full=Histone-lysine N-methyltransferase, H3 lysine-79 specific; AltName: Full=Histone H3-K79 methyltransferase; Short=H3-K79-HMTase [Coccidioides immitis RS]	Histone methylation protein DOT1
MDBOrad1_00362
MDBOrad1_00363
MDBOrad1_00364
MDBOrad1_00365	KOG3924@1|root,KOG3924@2759|Eukaryota,38BX3@33154|Opisthokonta,3NVIQ@4751|Fungi,3UZCE@5204|Basidiomycota,2268S@155619|Agaricomycetes,3W4AS@5338|Agaricales	3NVIQ@4751|Fungi	RecName: Full=Histone-lysine N-methyltransferase, H3 lysine-79 specific; AltName: Full=Histone H3-K79 methyltransferase; Short=H3-K79-HMTase [Coccidioides immitis RS]	Histone methylation protein DOT1
MDBOrad1_00366
MDBOrad1_00367						1
MDBOrad1_00368
MDBOrad1_00369	KOG3924@1|root,KOG3924@2759|Eukaryota,38BX3@33154|Opisthokonta,3NVIQ@4751|Fungi,3UZCE@5204|Basidiomycota,2268S@155619|Agaricomycetes,3W4AS@5338|Agaricales	3NVIQ@4751|Fungi	RecName: Full=Histone-lysine N-methyltransferase, H3 lysine-79 specific; AltName: Full=Histone H3-K79 methyltransferase; Short=H3-K79-HMTase [Coccidioides immitis RS]	Histone methylation protein DOT1
MDBOrad1_00370
MDBOrad1_00371
MDBOrad1_00372
MDBOrad1_00373	KOG3924@1|root,KOG3924@2759|Eukaryota,38BX3@33154|Opisthokonta,3NVIQ@4751|Fungi,3UZCE@5204|Basidiomycota,2268S@155619|Agaricomycetes,3W4AS@5338|Agaricales	3NVIQ@4751|Fungi	RecName: Full=Histone-lysine N-methyltransferase, H3 lysine-79 specific; AltName: Full=Histone H3-K79 methyltransferase; Short=H3-K79-HMTase [Coccidioides immitis RS]	Histone methylation protein DOT1
MDBOrad1_00374	KOG3061@1|root,KOG3061@2759|Eukaryota,3A06T@33154|Opisthokonta,3Q39A@4751|Fungi,3VC6S@5204|Basidiomycota,229SZ@155619|Agaricomycetes,3W7Q2@5338|Agaricales	3Q39A@4751|Fungi		Proteasome maturation factor UMP1
MDBOrad1_00375	2D3RN@1|root,2SSHU@2759|Eukaryota,3ARV5@33154|Opisthokonta,3PFKS@4751|Fungi,3V69A@5204|Basidiomycota,22AYP@155619|Agaricomycetes,3H6DS@355688|Agaricomycetes incertae sedis	3PFKS@4751|Fungi		Family of unknown function (DUF6699)
MDBOrad1_00376	KOG3771@1|root,KOG3771@2759|Eukaryota,38I4I@33154|Opisthokonta,3NU0B@4751|Fungi,3UXXZ@5204|Basidiomycota,227D1@155619|Agaricomycetes,3W54D@5338|Agaricales	3NU0B@4751|Fungi	RecName: Full=Protein hob1; AltName: Full=Homolog of Bin1 [Schizosaccharomyces pombe 972h-]	BAR domain
MDBOrad1_00377	2CYWI@1|root,2S6WB@2759|Eukaryota,3AACQ@33154|Opisthokonta,3P77K@4751|Fungi	3P77K@4751|Fungi		Zinc finger, ZZ type
MDBOrad1_00378	2EPZR@1|root,2ST3A@2759|Eukaryota,3APK3@33154|Opisthokonta,3PIKN@4751|Fungi,3V729@5204|Basidiomycota,22CDS@155619|Agaricomycetes,3W963@5338|Agaricales	3PIKN@4751|Fungi				5
MDBOrad1_00379	COG1958@1|root,KOG3168@2759|Eukaryota,3A88E@33154|Opisthokonta,3P8F2@4751|Fungi,3V6Q1@5204|Basidiomycota,22B9M@155619|Agaricomycetes,3H6E7@355688|Agaricomycetes incertae sedis	3P8F2@4751|Fungi		LSM domain
MDBOrad1_00380	KOG1290@1|root,KOG1290@2759|Eukaryota	KOG1290@2759|Eukaryota	RecName: Full=Serine/threonine-protein kinase SRPK; Short=PSRPK [Physarum polycephalum]	Protein kinase domain
MDBOrad1_00381	28Q1A@1|root,2QWQ0@2759|Eukaryota,39YYB@33154|Opisthokonta,3Q30Q@4751|Fungi,3V46K@5204|Basidiomycota,228SH@155619|Agaricomycetes,3W3Q3@5338|Agaricales	3Q30Q@4751|Fungi	RecName: Full=Protein F37C4.5 [Caenorhabditis elegans]	Domain of unknown function (DUF4139)
MDBOrad1_00382	2EZJK@1|root,2T0W1@2759|Eukaryota,3AVY6@33154|Opisthokonta,3PGRD@4751|Fungi,3V6VT@5204|Basidiomycota	3PGRD@4751|Fungi
MDBOrad1_00383	2BXE5@1|root,2SAFW@2759|Eukaryota,3A9X6@33154|Opisthokonta,3P7QH@4751|Fungi,3V274@5204|Basidiomycota,228XR@155619|Agaricomycetes,3W7PN@5338|Agaricales	3P7QH@4751|Fungi
MDBOrad1_00384
MDBOrad1_00385
MDBOrad1_00386	COG1020@1|root,KOG1178@2759|Eukaryota,39UD4@33154|Opisthokonta,3NVVB@4751|Fungi,3V4UQ@5204|Basidiomycota,2283X@155619|Agaricomycetes,3W3B0@5338|Agaricales	3NVVB@4751|Fungi	RecName: Full=Adenylate-forming reductase 03009; AltName: Full=Alanine/valine/serine reductase; AltName: Full=Nonribosomal peptide synthase 12-like enzyme; Short=NRPS-like [Coprinopsis cinerea okayama7#130]			5
MDBOrad1_00387	KOG1425@1|root,KOG1425@2759|Eukaryota,38SMH@33154|Opisthokonta,3NZ8S@4751|Fungi,3V0I6@5204|Basidiomycota,227T7@155619|Agaricomycetes,3W3P9@5338|Agaricales	3NZ8S@4751|Fungi		NAD(P)-binding Rossmann-like domain		1
MDBOrad1_00388	2CN61@1|root,2QU23@2759|Eukaryota,391XD@33154|Opisthokonta,3NWY2@4751|Fungi,3V11S@5204|Basidiomycota,227BT@155619|Agaricomycetes,3W3M6@5338|Agaricales	3NWY2@4751|Fungi
MDBOrad1_00389	COG5272@1|root,KOG0001@2759|Eukaryota,37K87@33090|Viridiplantae,3G7XW@35493|Streptophyta	3G7XW@35493|Streptophyta	RecName: Full=Ubiquitin [Coprinellus congregatus]	Ubiquitin family
MDBOrad1_00390	2EK2E@1|root,2SQ2J@2759|Eukaryota,3AP45@33154|Opisthokonta,3PENJ@4751|Fungi,3V5KN@5204|Basidiomycota,229YQ@155619|Agaricomycetes,3W7YK@5338|Agaricales	3PENJ@4751|Fungi
MDBOrad1_00391	COG0515@1|root,KOG0192@2759|Eukaryota	KOG0192@2759|Eukaryota	RecName: Full=HTH-type transcriptional regulator Rv1931c [Mycobacterium tuberculosis H37Rv]	DJ-1/PfpI family
MDBOrad1_00392	COG0515@1|root,KOG0192@2759|Eukaryota	KOG0192@2759|Eukaryota		DJ-1/PfpI family
MDBOrad1_00393	COG4021@1|root,KOG2721@2759|Eukaryota,38EX4@33154|Opisthokonta,3NXAV@4751|Fungi,3V047@5204|Basidiomycota,224NF@155619|Agaricomycetes,3W5EW@5338|Agaricales	3NXAV@4751|Fungi	RecName: Full=Probable tRNA(His) guanylyltransferase; AltName: Full=tRNA-histidine guanylyltransferase [Mus musculus]	tRNAHis guanylyltransferase
MDBOrad1_00394	COG1104@1|root,KOG1549@2759|Eukaryota,39V6W@33154|Opisthokonta,3NWXZ@4751|Fungi,3V3H2@5204|Basidiomycota,227HB@155619|Agaricomycetes,3W5FG@5338|Agaricales	3NWXZ@4751|Fungi	RecName: Full=Aminotransferase-like protein FGM3; AltName: Full=C64 cluster protein NRPS5; AltName: Full=Fg3_54 cluster protein FGM3; AltName: Full=Fusaoctaxin A biosynthesis cluster protein FGM3 [Fusarium graminearum PH-1]	Aminotransferase class-V
MDBOrad1_00395	KOG1398@1|root,KOG1398@2759|Eukaryota,39W21@33154|Opisthokonta,3NUHR@4751|Fungi,3UZ9G@5204|Basidiomycota,2264E@155619|Agaricomycetes,3W4TI@5338|Agaricales	3NUHR@4751|Fungi				2
MDBOrad1_00396	28RHX@1|root,2QY70@2759|Eukaryota,3AY5H@33154|Opisthokonta,3PJAP@4751|Fungi,3V8M7@5204|Basidiomycota,22D9W@155619|Agaricomycetes,3W9NR@5338|Agaricales	3PJAP@4751|Fungi
MDBOrad1_00397	KOG1477@1|root,KOG1477@2759|Eukaryota,38DWC@33154|Opisthokonta,3NVY9@4751|Fungi,3V3SM@5204|Basidiomycota,22EF6@155619|Agaricomycetes	3NVY9@4751|Fungi	RecName: Full=Ran-binding protein 10; Short=RanBP10 [Mus musculus]	SPRY domain
MDBOrad1_00398	COG2319@1|root,KOG0322@2759|Eukaryota,399NZ@33154|Opisthokonta,3NYG7@4751|Fungi,3V1J2@5204|Basidiomycota,226SP@155619|Agaricomycetes,3H3J0@355688|Agaricomycetes incertae sedis	3NYG7@4751|Fungi
MDBOrad1_00399
MDBOrad1_00400	2CKM7@1|root,2RR25@2759|Eukaryota,3A9Z0@33154|Opisthokonta,3PQ2I@4751|Fungi,3V2EF@5204|Basidiomycota,2295P@155619|Agaricomycetes	3PQ2I@4751|Fungi		N-terminal domain of CBF1 interacting co-repressor CIR
MDBOrad1_00401	KOG1037@1|root,KOG1037@2759|Eukaryota,38B7U@33154|Opisthokonta,3NV42@4751|Fungi,3V3XC@5204|Basidiomycota,224CN@155619|Agaricomycetes,3W5WZ@5338|Agaricales	3NV42@4751|Fungi	RecName: Full=Poly [ADP-ribose] polymerase 2; Short=PARP-2; AltName: Full=NAD(+) ADP-ribosyltransferase 2; Short=ADPRT-2; AltName: Full=Poly[ADP-ribose] synthase 2; AltName: Full=Protein ADP-ribosyltransferase PARP2 [Zea mays]	Poly(ADP-ribose) polymerase catalytic domain
MDBOrad1_00402	2A44H@1|root,2RY6P@2759|Eukaryota,39ZT6@33154|Opisthokonta,3P04H@4751|Fungi,3V3V1@5204|Basidiomycota	3P04H@4751|Fungi				3
MDBOrad1_00403	2CSJ9@1|root,2RC5K@2759|Eukaryota,3AYEV@33154|Opisthokonta,3PJJG@4751|Fungi,3V8XJ@5204|Basidiomycota,22CEH@155619|Agaricomycetes,3W9DU@5338|Agaricales	3PJJG@4751|Fungi
MDBOrad1_00404	COG2175@1|root,2QS34@2759|Eukaryota,38CBB@33154|Opisthokonta,3NVW9@4751|Fungi,3UZ0S@5204|Basidiomycota,227H7@155619|Agaricomycetes	3NVW9@4751|Fungi	RecName: Full=Alpha-ketoglutarate-dependent xanthine dioxygenase xan-1 [Neurospora crassa OR74A]	Taurine catabolism dioxygenase TauD, TfdA family
MDBOrad1_00405	2EHWV@1|root,2SNFU@2759|Eukaryota,3AKGF@33154|Opisthokonta,3PDEV@4751|Fungi,3V54N@5204|Basidiomycota,22A83@155619|Agaricomycetes	3PDEV@4751|Fungi		Zinc knuckle
MDBOrad1_00406	2CI44@1|root,2QQCT@2759|Eukaryota,3ABU8@33154|Opisthokonta,3P8PB@4751|Fungi,3V2UT@5204|Basidiomycota	2QQCT@2759|Eukaryota		Family of unknown function (DUF6535)		4
MDBOrad1_00407	2CKM7@1|root,2RR25@2759|Eukaryota,3A9Z0@33154|Opisthokonta,3PQ2I@4751|Fungi,3V2EF@5204|Basidiomycota,2295P@155619|Agaricomycetes	3PQ2I@4751|Fungi		N-terminal domain of CBF1 interacting co-repressor CIR
MDBOrad1_00408						3
MDBOrad1_00409						6
MDBOrad1_00410						4
MDBOrad1_00411	28PEG@1|root,2QW2A@2759|Eukaryota,38ZAG@33154|Opisthokonta,3NXQZ@4751|Fungi,3V2C6@5204|Basidiomycota,225ZR@155619|Agaricomycetes,3H48I@355688|Agaricomycetes incertae sedis	3NXQZ@4751|Fungi		Glycosyl hydrolases family 43	SP(Sec/SPI)		yes
MDBOrad1_00412	KOG1037@1|root,KOG1037@2759|Eukaryota,38B7U@33154|Opisthokonta,3NV42@4751|Fungi,3V3XC@5204|Basidiomycota,224CN@155619|Agaricomycetes,3W5WZ@5338|Agaricales	3NV42@4751|Fungi	RecName: Full=Poly [ADP-ribose] polymerase 2; Short=PARP-2; AltName: Full=NAD(+) ADP-ribosyltransferase 2; Short=ADPRT-2; AltName: Full=Poly[ADP-ribose] synthase 2; AltName: Full=Protein ADP-ribosyltransferase PARP2 [Zea mays]	Poly(ADP-ribose) polymerase catalytic domain
MDBOrad1_00413	2CYDX@1|root,2S3SW@2759|Eukaryota,39RS6@33154|Opisthokonta,3NZIE@4751|Fungi,3V3G3@5204|Basidiomycota,228W4@155619|Agaricomycetes,3H4UC@355688|Agaricomycetes incertae sedis	3NZIE@4751|Fungi		Alpha/beta hydrolase family
MDBOrad1_00414
MDBOrad1_00415	KOG1721@1|root,KOG1721@2759|Eukaryota,3A878@33154|Opisthokonta,3P7EH@4751|Fungi,3V2IA@5204|Basidiomycota,226WK@155619|Agaricomycetes,3W43J@5338|Agaricales	3P7EH@4751|Fungi	RecName: Full=Uncharacterized transcriptional regulatory protein C16G5.17 [Schizosaccharomyces pombe 972h-]	Fungal specific transcription factor domain
MDBOrad1_00416	2DNTF@1|root,2S67X@2759|Eukaryota,39R3R@33154|Opisthokonta,3NY7G@4751|Fungi,3V64F@5204|Basidiomycota,22D47@155619|Agaricomycetes,3W94I@5338|Agaricales	3NY7G@4751|Fungi				6
MDBOrad1_00417	COG0167@1|root,KOG1436@2759|Eukaryota,39TZG@33154|Opisthokonta,3NXK0@4751|Fungi,3V11M@5204|Basidiomycota,228IC@155619|Agaricomycetes,3W74E@5338|Agaricales	3NXK0@4751|Fungi		Dihydroorotate dehydrogenase
MDBOrad1_00418	KOG0527@1|root,KOG0527@2759|Eukaryota,3AAAJ@33154|Opisthokonta,3P6VC@4751|Fungi,3V2DZ@5204|Basidiomycota,2298W@155619|Agaricomycetes	3P6VC@4751|Fungi	RecName: Full=Transcription factor SOX-7 [Homo sapiens]	HMG (high mobility group) box
MDBOrad1_00419	2C7J6@1|root,2SHPA@2759|Eukaryota,3AE33@33154|Opisthokonta,3P9SQ@4751|Fungi,3V3IA@5204|Basidiomycota,2296B@155619|Agaricomycetes,3W7SR@5338|Agaricales	3P9SQ@4751|Fungi		Glycosyltransferase family 25 (LPS biosynthesis protein)		1
MDBOrad1_00420						1
MDBOrad1_00421	COG2421@1|root,2QRMK@2759|Eukaryota,38FKR@33154|Opisthokonta,3NWI6@4751|Fungi,3V035@5204|Basidiomycota,2259X@155619|Agaricomycetes,3H2J5@355688|Agaricomycetes incertae sedis	3NWI6@4751|Fungi	RecName: Full=Formamidase; AltName: Full=Formamide amidohydrolase [Methylophilus methylotrophus]	Acetamidase/Formamidase family
MDBOrad1_00422						3
MDBOrad1_00423	KOG3854@1|root,KOG3854@2759|Eukaryota,39RR1@33154|Opisthokonta,3NWHU@4751|Fungi,3V1Q6@5204|Basidiomycota,224RD@155619|Agaricomycetes,3W7A0@5338|Agaricales	3NWHU@4751|Fungi	RecName: Full=HMG box-containing protein C19G7.04 [Schizosaccharomyces pombe 972h-]	SprT-like family
MDBOrad1_00424	28PEG@1|root,2QW2A@2759|Eukaryota,38ZAG@33154|Opisthokonta,3NXQZ@4751|Fungi,3V2C6@5204|Basidiomycota,225ZR@155619|Agaricomycetes,3H48I@355688|Agaricomycetes incertae sedis	3NXQZ@4751|Fungi		Glycosyl hydrolases family 43	SP(Sec/SPI)	1
MDBOrad1_00425	28K08@1|root,2QSEP@2759|Eukaryota,39WY9@33154|Opisthokonta,3P4EN@4751|Fungi,3QT8W@4890|Ascomycota,20QEC@147545|Eurotiomycetes,3SCAH@5042|Eurotiales	3P4EN@4751|Fungi		Transferase family
MDBOrad1_00426						4
MDBOrad1_00427	28IH4@1|root,2SFJ8@2759|Eukaryota,3A80Q@33154|Opisthokonta,3P5XX@4751|Fungi,3V5VK@5204|Basidiomycota,22AJS@155619|Agaricomycetes,3H7A9@355688|Agaricomycetes incertae sedis	3P5XX@4751|Fungi		Repeat of unknown function (DUF5648)	SP(Sec/SPI)		yes
MDBOrad1_00428	KOG2407@1|root,KOG2407@2759|Eukaryota,38CRN@33154|Opisthokonta,3NUNX@4751|Fungi,3UZV1@5204|Basidiomycota,22521@155619|Agaricomycetes,3W3PW@5338|Agaricales	3NUNX@4751|Fungi	RecName: Full=GPI transamidase component PIG-T; AltName: Full=Phosphatidylinositol-glycan biosynthesis class T protein; Flags: Precursor [Homo sapiens]	Gpi16 subunit, GPI transamidase component	SP(Sec/SPI)	2
MDBOrad1_00429				Repeat of unknown function (DUF5648)
MDBOrad1_00430	28IH4@1|root,2SFJ8@2759|Eukaryota,3A80Q@33154|Opisthokonta,3P5XX@4751|Fungi,3V5VK@5204|Basidiomycota,22AJS@155619|Agaricomycetes	3P5XX@4751|Fungi		Repeat of unknown function (DUF5648)	SP(Sec/SPI)		yes
MDBOrad1_00431	COG2828@1|root,2QSUX@2759|Eukaryota,39T7M@33154|Opisthokonta,3NZ7X@4751|Fungi,3VBIC@5204|Basidiomycota,226HY@155619|Agaricomycetes	3NZ7X@4751|Fungi	RecName: Full=3-methylitaconate isomerase; AltName: Full=(R)-3-methylitaconate isomerase; AltName: Full=3-methylitaconate delta-isomerase [Eubacterium barkeri]	PrpF protein
MDBOrad1_00432	COG0522@1|root,KOG4655@2759|Eukaryota,38FIK@33154|Opisthokonta,3NXNU@4751|Fungi,3V0KB@5204|Basidiomycota,22892@155619|Agaricomycetes,3W687@5338|Agaricales	3NXNU@4751|Fungi	RecName: Full=U3 small nucleolar ribonucleoprotein protein IMP3; Short=U3 snoRNP protein IMP3; AltName: Full=Interacting with MPP10 protein 3 [Saccharomyces cerevisiae S288C]	Ribosomal protein S4/S9 N-terminal domain
MDBOrad1_00433
MDBOrad1_00434	COG3791@1|root,2SRJS@2759|Eukaryota,3A9EY@33154|Opisthokonta,3P6R8@4751|Fungi,3QZ8I@4890|Ascomycota	3P6R8@4751|Fungi		Glutathione-dependent formaldehyde-activating enzyme
MDBOrad1_00435	COG5128@1|root,KOG3315@2759|Eukaryota,38DX5@33154|Opisthokonta,3P13Z@4751|Fungi,3V0VP@5204|Basidiomycota,225X8@155619|Agaricomycetes	3P13Z@4751|Fungi	RecName: Full=Transport protein particle subunit trs31; Short=TRAPP subunit trs31 [Schizosaccharomyces pombe 972h-]	Transport protein particle (TRAPP) component
MDBOrad1_00436	28I6I@1|root,2QQGP@2759|Eukaryota,39U90@33154|Opisthokonta,3Q37J@4751|Fungi,3V3SR@5204|Basidiomycota,225Q1@155619|Agaricomycetes	3Q37J@4751|Fungi
MDBOrad1_00437					SP(Sec/SPI)		yes
MDBOrad1_00438			RecName: Full=Probable phosphoinositide phosphatase SAC9; Short=AtSAC9; AltName: Full=Protein SUPPRESSOR OF ACTIN 9; AltName: Full=SAC domain protein 9 [Arabidopsis thaliana]	WW domain
MDBOrad1_00439	28QTU@1|root,2QXGR@2759|Eukaryota,39TC2@33154|Opisthokonta,3NTX0@4751|Fungi,3V4ZP@5204|Basidiomycota,228QD@155619|Agaricomycetes,3H3EV@355688|Agaricomycetes incertae sedis	3NTX0@4751|Fungi	RecName: Full=Protein F37C4.5 [Caenorhabditis elegans]	Domain of unknown function (DUF4139)
MDBOrad1_00440	KOG2325@1|root,KOG2325@2759|Eukaryota,3AK5B@33154|Opisthokonta,3PBD5@4751|Fungi,3V3SQ@5204|Basidiomycota,227TI@155619|Agaricomycetes	3PBD5@4751|Fungi	RecName: Full=Uncharacterized protein CC613.01 [Schizosaccharomyces pombe 972h-]			12
MDBOrad1_00441	2EFVQ@1|root,2SKZ8@2759|Eukaryota,3AFP1@33154|Opisthokonta,3PC4C@4751|Fungi,3V4GU@5204|Basidiomycota,227TK@155619|Agaricomycetes	3PC4C@4751|Fungi
MDBOrad1_00442	arCOG05967@1|root,2QSXK@2759|Eukaryota,39T98@33154|Opisthokonta,3NUK6@4751|Fungi,3V3XS@5204|Basidiomycota,224Z7@155619|Agaricomycetes,3W66R@5338|Agaricales	3NUK6@4751|Fungi	RecName: Full=Peptide-N4-(N-acetyl-beta-glucosaminyl)asparagine amidase A; Short=PNGase A; AltName: Full=Glycopeptide N-glycosidase; AltName: Full=N-glycanase; Contains: RecName: Full=Peptide-N4-(N-acetyl-beta-glucosaminyl)asparagine amidase A light chain; AltName: Full=PNGase A small chain; AltName: Full=PNGase A subunit B; Contains: RecName: Full=Peptide-N4-(N-acetyl-beta-glucosaminyl)asparagin…	Peptide N-acetyl-beta-D-glucosaminyl asparaginase amidase A	SP(Sec/SPI)		yes
MDBOrad1_00443				F-box-like
MDBOrad1_00444						6
MDBOrad1_00445	28JIP@1|root,2QRXU@2759|Eukaryota,38F1U@33154|Opisthokonta,3NZTQ@4751|Fungi,3V3AJ@5204|Basidiomycota,226ST@155619|Agaricomycetes,3H4FV@355688|Agaricomycetes incertae sedis	3NZTQ@4751|Fungi	RecName: Full=Nuclease PA3; AltName: Full=Deoxyribonuclease PA3; AltName: Full=Endonuclease PA3 [Penicillium sp.]	S1/P1 Nuclease	SP(Sec/SPI)		yes
MDBOrad1_00446	KOG2896@1|root,KOG2896@2759|Eukaryota,39SMB@33154|Opisthokonta,3NU5N@4751|Fungi,3V14S@5204|Basidiomycota,226DT@155619|Agaricomycetes,3W4P7@5338|Agaricales	3NU5N@4751|Fungi	RecName: Full=UV radiation resistance-associated protein [Mus musculus]	Vacuolar sorting 38 and autophagy-related subunit 14
MDBOrad1_00447	COG5099@1|root,KOG2049@2759|Eukaryota,38DCC@33154|Opisthokonta,3NWIS@4751|Fungi,3UXZ7@5204|Basidiomycota,226BH@155619|Agaricomycetes,3W39C@5338|Agaricales	3NWIS@4751|Fungi	RecName: Full=Pumilio domain-containing protein C6G9.14 [Schizosaccharomyces pombe 972h-]	Pumilio-family RNA binding repeat
MDBOrad1_00448						1
MDBOrad1_00449	COG1020@1|root,KOG1178@2759|Eukaryota,39UD4@33154|Opisthokonta,3NVVB@4751|Fungi,3V4UQ@5204|Basidiomycota,2283X@155619|Agaricomycetes,3W3B0@5338|Agaricales	3NVVB@4751|Fungi	RecName: Full=Adenylate-forming reductase 03009; AltName: Full=Alanine/valine/serine reductase; AltName: Full=Nonribosomal peptide synthase 12-like enzyme; Short=NRPS-like [Coprinopsis cinerea okayama7#130]			5
MDBOrad1_00450
MDBOrad1_00451				Repeat of unknown function (DUF5648)	SP(Sec/SPI)		yes
MDBOrad1_00452	COG0639@1|root,KOG0376@2759|Eukaryota,3ANHZ@33154|Opisthokonta,3Q532@4751|Fungi,3V5U8@5204|Basidiomycota,229WJ@155619|Agaricomycetes,3H5K6@355688|Agaricomycetes incertae sedis	3Q532@4751|Fungi
MDBOrad1_00453	KOG4155@1|root,KOG4155@2759|Eukaryota,38CNE@33154|Opisthokonta,3NWMN@4751|Fungi,3UYJZ@5204|Basidiomycota,225JN@155619|Agaricomycetes	3NWMN@4751|Fungi	RecName: Full=Mitochondrial division protein 1 [Cryptococcus neoformans var. neoformans JEC21]_x0001_P0CS45.1 RecName: Full=Mitochondrial division protein 1 [Cryptococcus neoformans var. neoformans B-3501A]	WD domain, G-beta repeat
MDBOrad1_00454	KOG2262@1|root,KOG2262@2759|Eukaryota,38D6E@33154|Opisthokonta,3NUA6@4751|Fungi,3V40U@5204|Basidiomycota,227CX@155619|Agaricomycetes,3H0ZM@355688|Agaricomycetes incertae sedis	3NUA6@4751|Fungi	RecName: Full=Glutathione transporter 1 [Schizosaccharomyces pombe 972h-]	OPT oligopeptide transporter protein		14
MDBOrad1_00455	KOG0276@1|root,KOG0276@2759|Eukaryota,38EBC@33154|Opisthokonta,3NWHK@4751|Fungi,3UYE5@5204|Basidiomycota,226VP@155619|Agaricomycetes,3W30J@5338|Agaricales	3NWHK@4751|Fungi	RecName: Full=Coatomer subunit beta'; AltName: Full=Beta'-coat protein; Short=Beta'-COP; AltName: Full=p102 [Rattus norvegicus]	Coatomer WD associated region
MDBOrad1_00456						1
MDBOrad1_00457				Repeat of unknown function (DUF5648)	SP(Sec/SPI)		yes
MDBOrad1_00458
MDBOrad1_00459	COG1020@1|root,KOG1178@2759|Eukaryota,39UD4@33154|Opisthokonta,3NVVB@4751|Fungi,3V4UQ@5204|Basidiomycota,2283X@155619|Agaricomycetes,3W3B0@5338|Agaricales	3NVVB@4751|Fungi	RecName: Full=Adenylate-forming reductase 03009; AltName: Full=Alanine/valine/serine reductase; AltName: Full=Nonribosomal peptide synthase 12-like enzyme; Short=NRPS-like [Coprinopsis cinerea okayama7#130]	Repeat of unknown function (DUF5648)	SP(Sec/SPI)	7
MDBOrad1_00460	28IH4@1|root,2SFJ8@2759|Eukaryota,3A80Q@33154|Opisthokonta,3P5XX@4751|Fungi,3V5VK@5204|Basidiomycota,22AJS@155619|Agaricomycetes,3H7A9@355688|Agaricomycetes incertae sedis	3P5XX@4751|Fungi		Repeat of unknown function (DUF5648)	SP(Sec/SPI)		yes
MDBOrad1_00461
MDBOrad1_00462	28IH4@1|root,2SFJ8@2759|Eukaryota,3A80Q@33154|Opisthokonta,3P5XX@4751|Fungi,3V5VK@5204|Basidiomycota,22AJS@155619|Agaricomycetes	3P5XX@4751|Fungi		Repeat of unknown function (DUF5648)	SP(Sec/SPI)		yes
MDBOrad1_00463
MDBOrad1_00464	COG3791@1|root,2SRJS@2759|Eukaryota,3A9EY@33154|Opisthokonta,3P6R8@4751|Fungi,3QZ8I@4890|Ascomycota,21BPZ@147550|Sordariomycetes,3TJ5F@5125|Hypocreales	3P6R8@4751|Fungi		Glutathione-dependent formaldehyde-activating enzyme
MDBOrad1_00465	COG1472@1|root,2QR4D@2759|Eukaryota,38FS1@33154|Opisthokonta,3NVBN@4751|Fungi,3UZ4U@5204|Basidiomycota,224YN@155619|Agaricomycetes,3W3RE@5338|Agaricales	3NVBN@4751|Fungi	RecName: Full=Probable beta-glucosidase L; AltName: Full=Beta-D-glucoside glucohydrolase L; AltName: Full=Cellobiase L; AltName: Full=Gentiobiase L; Flags: Precursor [Aspergillus terreus NIH2624]	Glycosyl hydrolase family 3 C-terminal domain	SP(Sec/SPI)		yes
MDBOrad1_00466				Repeat of unknown function (DUF5648)	SP(Sec/SPI)		yes
MDBOrad1_00467	COG2828@1|root,2QSUX@2759|Eukaryota,39T7M@33154|Opisthokonta,3NZ7X@4751|Fungi,3VBIC@5204|Basidiomycota,226HY@155619|Agaricomycetes	3NZ7X@4751|Fungi	RecName: Full=2-methyl-aconitate isomerase; AltName: Full=Cis-trans isomerase [Shewanella oneidensis MR-1]	PrpF protein
MDBOrad1_00468	COG0522@1|root,KOG4655@2759|Eukaryota,38FIK@33154|Opisthokonta,3NXNU@4751|Fungi,3V0KB@5204|Basidiomycota,22892@155619|Agaricomycetes,3W687@5338|Agaricales	3NXNU@4751|Fungi	RecName: Full=U3 small nucleolar ribonucleoprotein protein IMP3; Short=U3 snoRNP protein IMP3; AltName: Full=Interacting with MPP10 protein 3 [Saccharomyces cerevisiae S288C]	Ribosomal protein S4/S9 N-terminal domain
MDBOrad1_00469
MDBOrad1_00470	COG3791@1|root,2SRJS@2759|Eukaryota,3A9EY@33154|Opisthokonta,3P6R8@4751|Fungi,3QZ8I@4890|Ascomycota	3P6R8@4751|Fungi		Glutathione-dependent formaldehyde-activating enzyme
MDBOrad1_00471	2E2XF@1|root,2SA3F@2759|Eukaryota,3ASIP@33154|Opisthokonta,3PH4V@4751|Fungi,3V74E@5204|Basidiomycota,22CP6@155619|Agaricomycetes,3W8II@5338|Agaricales	3PH4V@4751|Fungi				2
MDBOrad1_00472	KOG3158@1|root,KOG3158@2759|Eukaryota,3A1J4@33154|Opisthokonta,3P2NF@4751|Fungi,3V3RZ@5204|Basidiomycota,22E70@155619|Agaricomycetes	3P2NF@4751|Fungi	RecName: Full=Protein wos2; AltName: Full=p21 [Schizosaccharomyces pombe 972h-]	CS domain
MDBOrad1_00473	COG3791@1|root,2SRJS@2759|Eukaryota,3A9EY@33154|Opisthokonta,3P6R8@4751|Fungi,3QZ8I@4890|Ascomycota	3P6R8@4751|Fungi		Glutathione-dependent formaldehyde-activating enzyme
MDBOrad1_00474	KOG0255@1|root,KOG0255@2759|Eukaryota,38PBH@33154|Opisthokonta,3NWFT@4751|Fungi,3V48E@5204|Basidiomycota,225RP@155619|Agaricomycetes	3NWFT@4751|Fungi	RecName: Full=MFS transporter cpaT; AltName: Full=Cyclopiazonic acid biosynthesis cluster protein T [Aspergillus oryzae]	Major Facilitator Superfamily		11
MDBOrad1_00475	2CN61@1|root,2QU23@2759|Eukaryota,391XD@33154|Opisthokonta,3NWY2@4751|Fungi,3V11S@5204|Basidiomycota,227BT@155619|Agaricomycetes,3W3M6@5338|Agaricales	3NWY2@4751|Fungi			SP(Sec/SPI)		yes
MDBOrad1_00476	2CN61@1|root,2QU23@2759|Eukaryota,391XD@33154|Opisthokonta,3NWY2@4751|Fungi,3VBS2@5204|Basidiomycota,22E38@155619|Agaricomycetes,3W9UN@5338|Agaricales	3NWY2@4751|Fungi	RecName: Full=Pathogenicity cluster 5 protein d; Flags: Precursor [Colletotrichum graminicola M1.001]		SP(Sec/SPI)		yes
MDBOrad1_00477	2C8QW@1|root,2STD5@2759|Eukaryota,3AQZX@33154|Opisthokonta,3PG5P@4751|Fungi,3V6JS@5204|Basidiomycota,22C5M@155619|Agaricomycetes	3PG5P@4751|Fungi
MDBOrad1_00478	COG0277@1|root,KOG1231@2759|Eukaryota,38FPF@33154|Opisthokonta,3NZ5Q@4751|Fungi,3V3GF@5204|Basidiomycota,227P9@155619|Agaricomycetes,3H080@355688|Agaricomycetes incertae sedis	3NZ5Q@4751|Fungi
MDBOrad1_00479	COG2124@1|root,KOG0156@2759|Eukaryota,38BSU@33154|Opisthokonta,3P0Q5@4751|Fungi,3V3S3@5204|Basidiomycota,2266D@155619|Agaricomycetes,3W8WI@5338|Agaricales	3P0Q5@4751|Fungi	RecName: Full=Cytochrome P450 monooxygenase 208 [Postia placenta Mad-698-R]	Cytochrome P450		1
MDBOrad1_00480	2E96U@1|root,2SFK9@2759|Eukaryota,3ABE6@33154|Opisthokonta,3P9NP@4751|Fungi,3V365@5204|Basidiomycota	3P9NP@4751|Fungi		Glutathione S-transferase, N-terminal domain
MDBOrad1_00481
MDBOrad1_00482	2D1UW@1|root,2SJBV@2759|Eukaryota,3AJ0E@33154|Opisthokonta,3PCXZ@4751|Fungi,3V515@5204|Basidiomycota,22BFT@155619|Agaricomycetes,3W792@5338|Agaricales	3PCXZ@4751|Fungi		Family of unknown function (DUF6589)
MDBOrad1_00483						2
MDBOrad1_00484	COG5246@1|root,KOG0227@2759|Eukaryota,38E2K@33154|Opisthokonta,3NVSR@4751|Fungi,3UXTF@5204|Basidiomycota,224B5@155619|Agaricomycetes,3W5PN@5338|Agaricales	3NVSR@4751|Fungi	RecName: Full=Splicing factor 3A subunit 2 [Rattus norvegicus]	Pre-mRNA-splicing factor SF3a complex subunit 2 (Prp11)
MDBOrad1_00485	COG1075@1|root,2QQNH@2759|Eukaryota,39FUA@33154|Opisthokonta,3NWWF@4751|Fungi,3UYWH@5204|Basidiomycota,226SD@155619|Agaricomycetes,3W4Q8@5338|Agaricales	3NWWF@4751|Fungi	RecName: Full=Triacylglycerol lipase 2; AltName: Full=Lipase 2; AltName: Full=Neutral lipid hydrolase [Saccharomyces cerevisiae S288C]	PGAP1-like protein
MDBOrad1_00486	COG2273@1|root,2QR13@2759|Eukaryota,38E3H@33154|Opisthokonta,3NUWF@4751|Fungi,3V4Y4@5204|Basidiomycota,225KI@155619|Agaricomycetes,3W6A4@5338|Agaricales	3NUWF@4751|Fungi				1
MDBOrad1_00487	COG0553@1|root,KOG0383@2759|Eukaryota,38BGB@33154|Opisthokonta,3NVPP@4751|Fungi,3UY95@5204|Basidiomycota,227JH@155619|Agaricomycetes,3H38G@355688|Agaricomycetes incertae sedis	3NVPP@4751|Fungi	RecName: Full=Chromatin remodeling factor mit1; AltName: Full=Mi2-like interacting with clr3 protein 1; AltName: Full=Snf2/Hdac-containing repressor complex protein mit1; Short=SHREC protein mit1 [Schizosaccharomyces pombe 972h-]	SNF2-related domain
MDBOrad1_00488	KOG3691@1|root,KOG3691@2759|Eukaryota,38DB8@33154|Opisthokonta,3NURI@4751|Fungi,3UZE1@5204|Basidiomycota,227JX@155619|Agaricomycetes,3W35P@5338|Agaricales	3NURI@4751|Fungi	RecName: Full=Probable exocyst complex component sec8 [Neurospora crassa OR74A]	Sec8 exocyst complex component specific domain
MDBOrad1_00489	2E2KR@1|root,2S9TZ@2759|Eukaryota,3A8TZ@33154|Opisthokonta,3P7JZ@4751|Fungi,3V2NY@5204|Basidiomycota,229FR@155619|Agaricomycetes,3W7NN@5338|Agaricales	3P7JZ@4751|Fungi		LYR motif-containing protein 2-like
MDBOrad1_00490
MDBOrad1_00491	COG1161@1|root,KOG1424@2759|Eukaryota,38DR0@33154|Opisthokonta,3NVEZ@4751|Fungi,3UYPN@5204|Basidiomycota,2284P@155619|Agaricomycetes,3H2JU@355688|Agaricomycetes incertae sedis	3NVEZ@4751|Fungi	RecName: Full=Large subunit GTPase 1 [Schizosaccharomyces pombe 972h-]	50S ribosome-binding GTPase
MDBOrad1_00492	KOG0032@1|root,KOG0032@2759|Eukaryota,38JN9@33154|Opisthokonta,3P07Q@4751|Fungi,3V0U8@5204|Basidiomycota,226G8@155619|Agaricomycetes,3W7W0@5338|Agaricales	3P07Q@4751|Fungi	RecName: Full=Meiosis-specific serine/threonine-protein kinase MEK1 [Saccharomyces cerevisiae S288C]	Protein kinase domain
MDBOrad1_00493	COG0627@1|root,KOG3101@2759|Eukaryota,38RFR@33154|Opisthokonta,3NW46@4751|Fungi,3UZ8V@5204|Basidiomycota,227BU@155619|Agaricomycetes,3W44H@5338|Agaricales	3NW46@4751|Fungi	RecName: Full=S-formylglutathione hydrolase; Short=FGH; AltName: Full=Esterase D [Sus scrofa]	Putative esterase
MDBOrad1_00494	COG2303@1|root,KOG1238@2759|Eukaryota,38UEK@33154|Opisthokonta,3NUFD@4751|Fungi,3UYTX@5204|Basidiomycota,226KF@155619|Agaricomycetes,3W51M@5338|Agaricales	3NUFD@4751|Fungi	RecName: Full=GMC oxidoreductase family protein Mala s 12; AltName: Allergen=Mala s 12; Flags: Precursor [Malassezia sympodialis ATCC 42132]_x0001_Q5GMY3.2 RecName: Full=GMC oxidoreductase family protein Mala s 12.0101; AltName: Allergen=Mala s 12.0101; Flags: Precursor [Malassezia sympodialis]	GMC oxidoreductase	SP(Sec/SPI)		yes
MDBOrad1_00495	2CN61@1|root,2QU23@2759|Eukaryota,391XD@33154|Opisthokonta,3NWY2@4751|Fungi,3VBS2@5204|Basidiomycota,22E38@155619|Agaricomycetes,3W9UN@5338|Agaricales	3NWY2@4751|Fungi	RecName: Full=Pathogenicity cluster 5 protein d; Flags: Precursor [Colletotrichum graminicola M1.001]
MDBOrad1_00496	29CJI@1|root,2RJPB@2759|Eukaryota,38BXG@33154|Opisthokonta,3NXGN@4751|Fungi,3V36E@5204|Basidiomycota,22AKN@155619|Agaricomycetes	3NXGN@4751|Fungi	RecName: Full=Putative vacuolar protein sorting-associated protein TDA6; AltName: Full=Topoisomerase I damage affected protein 6 [Saccharomyces cerevisiae S288C]	Vacuolar protein sorting-associated protein 62	SP(Sec/SPI)	1
MDBOrad1_00497	2EIB7@1|root,2SNSJ@2759|Eukaryota,3AKGZ@33154|Opisthokonta,3PDJ9@4751|Fungi,3V57V@5204|Basidiomycota,225S9@155619|Agaricomycetes,3W7FE@5338|Agaricales	3PDJ9@4751|Fungi	RecName: Full=Ribonuclease 3; AltName: Full=Ribonuclease III; Short=RNase III [Lactobacillus johnsonii NCC 533]	Ribonuclease-III-like
MDBOrad1_00498	29GP9@1|root,2RPVK@2759|Eukaryota,39ZDU@33154|Opisthokonta,3NWG0@4751|Fungi,3UZ2Z@5204|Basidiomycota,224ZA@155619|Agaricomycetes	3NWG0@4751|Fungi		Fungal specific transcription factor domain
MDBOrad1_00499	COG5052@1|root,KOG1726@2759|Eukaryota,39RZP@33154|Opisthokonta,3PE7E@4751|Fungi,3V5C9@5204|Basidiomycota,22A4C@155619|Agaricomycetes,3W7GD@5338|Agaricales	3PE7E@4751|Fungi	RecName: Full=Putative HVA22-like protein g; Short=AtHVA22g [Arabidopsis thaliana]	TB2/DP1, HVA22 family		2
MDBOrad1_00500	KOG1290@1|root,KOG1290@2759|Eukaryota,3AKUY@33154|Opisthokonta,3PE8E@4751|Fungi,3V5G9@5204|Basidiomycota,229VB@155619|Agaricomycetes,3H5RU@355688|Agaricomycetes incertae sedis	3PE8E@4751|Fungi	RecName: Full=Serine/threonine-protein kinase PRP4 homolog; AltName: Full=PRP4 pre-mRNA-processing factor 4 homolog [Pongo abelii]	Protein kinase domain
MDBOrad1_00501	2D1CT@1|root,2SHN1@2759|Eukaryota,3AR6K@33154|Opisthokonta,3PGI2@4751|Fungi,3V73Q@5204|Basidiomycota	3PGI2@4751|Fungi		Phosphotransferase enzyme family
MDBOrad1_00502	COG2319@1|root,KOG0271@1|root,KOG0272@1|root,KOG0263@2759|Eukaryota,KOG0271@2759|Eukaryota,KOG0272@2759|Eukaryota,3AFR9@33154|Opisthokonta,3Q3UV@4751|Fungi,3V7GV@5204|Basidiomycota,22FKE@155619|Agaricomycetes,3H8XM@355688|Agaricomycetes incertae sedis	KOG0272@2759|Eukaryota	RecName: Full=Nuclear distribution protein nudF 1; AltName: Full=Lissencephaly-1 homolog 1; Short=LIS-1 1 [Talaromyces marneffei ATCC 18224]	WD domain, G-beta repeat
MDBOrad1_00503	28U5G@1|root,2R0W4@2759|Eukaryota,3AYKH@33154|Opisthokonta,3PJQS@4751|Fungi,3V93S@5204|Basidiomycota,22DSB@155619|Agaricomycetes,3W8H8@5338|Agaricales	3PJQS@4751|Fungi
MDBOrad1_00504	KOG2148@1|root,KOG2148@2759|Eukaryota,38EC2@33154|Opisthokonta,3NWGN@4751|Fungi,3UYCX@5204|Basidiomycota,225VZ@155619|Agaricomycetes,3W5H8@5338|Agaricales	3NWGN@4751|Fungi	RecName: Full=Exocyst complex component 1; AltName: Full=Exocyst complex component Sec3 [Mus musculus]	Exocyst complex component Sec3
MDBOrad1_00505	KOG0198@1|root,KOG0198@2759|Eukaryota,39J79@33154|Opisthokonta,3NVHJ@4751|Fungi,3QK3M@4890|Ascomycota,3RTDC@4891|Saccharomycetes	3NVHJ@4751|Fungi	RecName: Full=Serine/threonine-protein kinase BCK1/SLK1/SSP31 [Saccharomyces cerevisiae S288C]	Protein kinase domain
MDBOrad1_00506	COG5078@1|root,KOG0895@2759|Eukaryota,38KJS@33154|Opisthokonta,3NYWY@4751|Fungi,3UZUZ@5204|Basidiomycota,224XZ@155619|Agaricomycetes,3W60E@5338|Agaricales	3NYWY@4751|Fungi	RecName: Full=Probable ubiquitin-conjugating enzyme E2 23; AltName: Full=E2 ubiquitin-conjugating enzyme 23; AltName: Full=Ubiquitin carrier protein 23 [Arabidopsis thaliana]	Ubiquitin-conjugating enzyme
MDBOrad1_00507	2EE8W@1|root,2SJQ6@2759|Eukaryota,3AGXT@33154|Opisthokonta,3PACZ@4751|Fungi,3V4QW@5204|Basidiomycota,224UC@155619|Agaricomycetes,3W7GE@5338|Agaricales	3PACZ@4751|Fungi
MDBOrad1_00508	COG0548@1|root,KOG2436@2759|Eukaryota,39TIQ@33154|Opisthokonta,3NUKB@4751|Fungi,3V05B@5204|Basidiomycota,2272K@155619|Agaricomycetes,3W5CX@5338|Agaricales	3NUKB@4751|Fungi	RecName: Full=Amino-acid acetyltransferase, mitochondrial; AltName: Full=Arginine-requiring protein 2; AltName: Full=Glutamate N-acetyltransferase; AltName: Full=N-acetylglutamate synthase; Short=AGS; Short=NAGS; Flags: Precursor [Coprinopsis cinerea okayama7#130]	NAT, N-acetyltransferase, of N-acetylglutamate synthase
MDBOrad1_00509	COG2335@1|root,KOG0758@1|root,KOG0758@2759|Eukaryota,KOG1437@2759|Eukaryota,38BD7@33154|Opisthokonta,3NTYD@4751|Fungi,3V7D0@5204|Basidiomycota,224MH@155619|Agaricomycetes	3NTYD@4751|Fungi
MDBOrad1_00510	COG1171@1|root,KOG2547@2759|Eukaryota,38DAM@33154|Opisthokonta,3NX2E@4751|Fungi,3UZRG@5204|Basidiomycota,227WF@155619|Agaricomycetes,3W3J9@5338|Agaricales	3NX2E@4751|Fungi	RecName: Full=Ceramide glucosyltransferase; AltName: Full=GLCT-1; AltName: Full=Glucosylceramide synthase; Short=GCS; AltName: Full=UDP-glucose ceramide glucosyltransferase; AltName: Full=UDP-glucose:N-acylsphingosine D-glucosyltransferase [Cryptococcus neoformans var. grubii H99]	Glycosyl transferase family 21		3
MDBOrad1_00511	COG0553@1|root,KOG1001@2759|Eukaryota,38E02@33154|Opisthokonta,3NVHM@4751|Fungi,3UY5G@5204|Basidiomycota,2282H@155619|Agaricomycetes	3NVHM@4751|Fungi	RecName: Full=Helicase-like transcription factor CHR27; AltName: Full=Protein CHROMATIN REMODELING 27; AltName: Full=Protein SNF2-RING-HELICASE-LIKE 1 [Arabidopsis thaliana]	SNF2-related domain
MDBOrad1_00512	COG0421@1|root,COG1748@1|root,KOG0172@2759|Eukaryota,KOG1562@2759|Eukaryota,38BKM@33154|Opisthokonta,3NUXI@4751|Fungi,3UZNN@5204|Basidiomycota,227ZQ@155619|Agaricomycetes,3W5FC@5338|Agaricales	3NUXI@4751|Fungi	RecName: Full=Saccharopine dehydrogenase [NADP(+), L-glutamate-forming]; AltName: Full=Saccharopine reductase [Schizosaccharomyces pombe 972h-]	Saccharopine dehydrogenase C-terminal domain		7
MDBOrad1_00513	28U5G@1|root,2R0W4@2759|Eukaryota,3AYKH@33154|Opisthokonta,3PJQS@4751|Fungi,3V93S@5204|Basidiomycota,22DSB@155619|Agaricomycetes,3W8H8@5338|Agaricales	3PJQS@4751|Fungi
MDBOrad1_00514
MDBOrad1_00515				F-box-like
MDBOrad1_00516
MDBOrad1_00517	COG2273@1|root,2QR13@2759|Eukaryota,38E3H@33154|Opisthokonta,3NUWF@4751|Fungi,3UYZU@5204|Basidiomycota,226W7@155619|Agaricomycetes,3H1M7@355688|Agaricomycetes incertae sedis	3NUWF@4751|Fungi	RecName: Full=Beta-glucan synthesis-associated protein KRE6; AltName: Full=Killer toxin-resistance protein 6 [Saccharomyces cerevisiae S288C]	Beta-glucan synthesis-associated protein SKN1/KRE6/Sbg1		1
MDBOrad1_00518	2C8QS@1|root,2SFRY@2759|Eukaryota,3ACAD@33154|Opisthokonta,3P9BI@4751|Fungi,3V33K@5204|Basidiomycota,227KR@155619|Agaricomycetes,3H4KB@355688|Agaricomycetes incertae sedis	3P9BI@4751|Fungi		Small nuclear RNA activating complex (SNAPc), subunit 1
MDBOrad1_00519	KOG4623@1|root,KOG4623@2759|Eukaryota,3A1AF@33154|Opisthokonta,3P1ZG@4751|Fungi,3V1XR@5204|Basidiomycota,227SW@155619|Agaricomycetes,3W34R@5338|Agaricales	3P1ZG@4751|Fungi		Ima1 N-terminal domain		3
MDBOrad1_00520	2DJ9A@1|root,2S607@2759|Eukaryota,3A6ZG@33154|Opisthokonta,3P6IY@4751|Fungi,3V1UA@5204|Basidiomycota,2296M@155619|Agaricomycetes,3W74X@5338|Agaricales	3P6IY@4751|Fungi			SP(Sec/SPI)	1
MDBOrad1_00521	28N82@1|root,2QUTC@2759|Eukaryota,38HRW@33154|Opisthokonta,3NZMU@4751|Fungi,3V025@5204|Basidiomycota,226NK@155619|Agaricomycetes,3W606@5338|Agaricales	3NZMU@4751|Fungi		Heparinase II/III-like protein		1
MDBOrad1_00522	COG0183@1|root,KOG1389@2759|Eukaryota,38F89@33154|Opisthokonta,3NX2U@4751|Fungi,3V00E@5204|Basidiomycota,228NG@155619|Agaricomycetes,3W6NU@5338|Agaricales	3NX2U@4751|Fungi	RecName: Full=3-ketoacyl-CoA thiolase, peroxisomal; AltName: Full=Acetyl-CoA acyltransferase; AltName: Full=Beta-ketothiolase; AltName: Full=Peroxisomal 3-oxoacyl-CoA thiolase; Flags: Precursor [Yarrowia lipolytica CLIB122]	Thiolase, N-terminal domain
MDBOrad1_00523	COG0084@1|root,KOG3020@2759|Eukaryota,38FZ5@33154|Opisthokonta,3NVMD@4751|Fungi,3UZPJ@5204|Basidiomycota,2264V@155619|Agaricomycetes,3H0AM@355688|Agaricomycetes incertae sedis	3NVMD@4751|Fungi	RecName: Full=Deoxyribonuclease TATDN1 [Bos taurus]	TatD related DNase
MDBOrad1_00524
MDBOrad1_00525	2CVP0@1|root,2RSEN@2759|Eukaryota,3AEUZ@33154|Opisthokonta,3PC4B@4751|Fungi,3V4TY@5204|Basidiomycota,22A9H@155619|Agaricomycetes,3W75Z@5338|Agaricales	3PC4B@4751|Fungi		F-box-like
MDBOrad1_00526	COG1028@1|root,KOG0725@2759|Eukaryota,38E1P@33154|Opisthokonta,3NYJU@4751|Fungi	3NYJU@4751|Fungi	RecName: Full=Rhamnolipids biosynthesis 3-oxoacyl-[acyl-carrier-protein] reductase; AltName: Full=3-ketoacyl-acyl carrier protein reductase [Pseudomonas aeruginosa PAO1]	Enoyl-(Acyl carrier protein) reductase
MDBOrad1_00527	COG0008@1|root,KOG1147@2759|Eukaryota,38B44@33154|Opisthokonta,3NUH3@4751|Fungi,3UYZB@5204|Basidiomycota,228SY@155619|Agaricomycetes,3H2SH@355688|Agaricomycetes incertae sedis	3NUH3@4751|Fungi	RecName: Full=Probable glutamate--tRNA ligase, cytoplasmic; AltName: Full=Glutamyl-tRNA synthetase; Short=GluRS [Schizosaccharomyces pombe 972h-]	tRNA synthetases class I (E and Q), catalytic domain
MDBOrad1_00528	COG1253@1|root,KOG2118@2759|Eukaryota,38BRM@33154|Opisthokonta,3NW0Y@4751|Fungi,3UZC3@5204|Basidiomycota,226XY@155619|Agaricomycetes,3W405@5338|Agaricales	3NW0Y@4751|Fungi	RecName: Full=Uncharacterized protein C4B3.03c; Flags: Precursor [Schizosaccharomyces pombe 972h-]	Cyclin M transmembrane N-terminal domain		5
MDBOrad1_00529	COG2319@1|root,KOG0271@1|root,KOG0272@1|root,KOG0263@2759|Eukaryota,KOG0271@2759|Eukaryota,KOG0272@2759|Eukaryota,3AFR9@33154|Opisthokonta,3Q3UV@4751|Fungi,3V7GV@5204|Basidiomycota,22FKE@155619|Agaricomycetes,3H8XM@355688|Agaricomycetes incertae sedis	KOG0272@2759|Eukaryota	RecName: Full=Guanine nucleotide-binding protein subunit beta-like protein; AltName: Full=Antigen LACK [Leishmania chagasi]_x0001_P62884.1 RecName: Full=Guanine nucleotide-binding protein subunit beta-like protein; AltName: Full=Antigen LACK; AltName: Full=LiP36; AltName: Full=p36Li [Leishmania infantum]	WD domain, G-beta repeat
MDBOrad1_00530
MDBOrad1_00531	COG2227@1|root,KOG1270@2759|Eukaryota,3A458@33154|Opisthokonta,3P43S@4751|Fungi,3V52X@5204|Basidiomycota,229MI@155619|Agaricomycetes,3H4WP@355688|Agaricomycetes incertae sedis	3P43S@4751|Fungi	RecName: Full=Uncharacterized methyltransferase C1347.09 [Schizosaccharomyces pombe 972h-]	Methyltransferase domain
MDBOrad1_00532	COG2335@1|root,KOG0758@1|root,KOG0758@2759|Eukaryota,KOG1437@2759|Eukaryota,38BD7@33154|Opisthokonta,3NTYD@4751|Fungi,3V7D0@5204|Basidiomycota,224MH@155619|Agaricomycetes,3W3BV@5338|Agaricales	3NTYD@4751|Fungi	RecName: Full=Mitochondrial carnitine/acylcarnitine carrier protein; AltName: Full=Carnitine/acylcarnitine translocase; Short=CAC; Short=mCAC; AltName: Full=Solute carrier family 25 member 20 [Mus musculus]	Mitochondrial carrier protein		2
MDBOrad1_00533	KOG2449@1|root,KOG2449@2759|Eukaryota,38EU5@33154|Opisthokonta,3NWK1@4751|Fungi,3UYCZ@5204|Basidiomycota,225TN@155619|Agaricomycetes,3W6HW@5338|Agaricales	3NWK1@4751|Fungi	RecName: Full=Probable methylmalonate-semialdehyde dehydrogenase [acylating], mitochondrial; Short=MMSDH; Short=Malonate-semialdehyde dehydrogenase [acylating]; Flags: Precursor [Aedes aegypti]	Aldehyde dehydrogenase family
MDBOrad1_00534	2EH4R@1|root,2SMWM@2759|Eukaryota,3AJJ5@33154|Opisthokonta,3PD5F@4751|Fungi,3V5AX@5204|Basidiomycota,22AC1@155619|Agaricomycetes,3W3VM@5338|Agaricales	3PD5F@4751|Fungi
MDBOrad1_00535	2EH4R@1|root,2SMWM@2759|Eukaryota,3AJJ5@33154|Opisthokonta,3PD5F@4751|Fungi,3V5AX@5204|Basidiomycota,22AC1@155619|Agaricomycetes,3W3VM@5338|Agaricales	3PD5F@4751|Fungi
MDBOrad1_00536	COG0328@1|root,KOG1075@1|root,KOG1075@2759|Eukaryota,KOG3752@2759|Eukaryota,39Q7E@33154|Opisthokonta,3Q6DK@4751|Fungi,3V7NR@5204|Basidiomycota,22FT6@155619|Agaricomycetes	3Q6DK@4751|Fungi	RecName: Full=Transposon TX1 uncharacterized 149 kDa protein; AltName: Full=ORF 2 [Xenopus laevis]	Reverse transcriptase (RNA-dependent DNA polymerase)
MDBOrad1_00537	COG5044@1|root,KOG1439@2759|Eukaryota,38CZK@33154|Opisthokonta,3NU8W@4751|Fungi,3UYYD@5204|Basidiomycota,224JZ@155619|Agaricomycetes,3W3AM@5338|Agaricales	3NU8W@4751|Fungi	RecName: Full=Probable secretory pathway GDP dissociation inhibitor 1 [Schizosaccharomyces pombe 972h-]	GDP dissociation inhibitor
MDBOrad1_00538				F-box-like
MDBOrad1_00539	2D4X6@1|root,2SWKJ@2759|Eukaryota,3AUWP@33154|Opisthokonta,3PGYA@4751|Fungi,3V7A6@5204|Basidiomycota,22CD9@155619|Agaricomycetes	3PGYA@4751|Fungi		F-box-like
MDBOrad1_00540
MDBOrad1_00541	KOG1064@1|root,KOG1064@2759|Eukaryota,38E6B@33154|Opisthokonta,3NXZY@4751|Fungi,3UZUU@5204|Basidiomycota,226KH@155619|Agaricomycetes,3W5U4@5338|Agaricales	3NXZY@4751|Fungi	RecName: Full=Regulator of V-ATPase in vacuolar membrane protein 1; AltName: Full=Suppression of the onset of impotence protein 3 [Saccharomyces cerevisiae S288C]	RAVE protein 1 C terminal
MDBOrad1_00542	KOG1721@1|root,KOG1721@2759|Eukaryota,39KVP@33154|Opisthokonta,3Q59A@4751|Fungi,3V7CH@5204|Basidiomycota,22CQG@155619|Agaricomycetes,3W9DE@5338|Agaricales	3Q59A@4751|Fungi
MDBOrad1_00543	2E4CC@1|root,2SB9J@2759|Eukaryota,3A9F3@33154|Opisthokonta,3P6WA@4751|Fungi,3V2GN@5204|Basidiomycota,2290X@155619|Agaricomycetes,3W6TP@5338|Agaricales	3P6WA@4751|Fungi		SH3-binding, glutamic acid-rich protein
MDBOrad1_00544	COG0394@1|root,KOG3217@2759|Eukaryota,3A3GB@33154|Opisthokonta,3P1R8@4751|Fungi,3V58N@5204|Basidiomycota,22E5R@155619|Agaricomycetes	3P1R8@4751|Fungi	RecName: Full=Low molecular weight phosphotyrosine protein phosphatase; AltName: Full=Low molecular weight cytosolic acid phosphatase; AltName: Full=PTPase; AltName: Full=Small tyrosine phosphatase [Schizosaccharomyces pombe 972h-]	Low molecular weight phosphotyrosine protein phosphatase
MDBOrad1_00545	COG0667@1|root,KOG1575@2759|Eukaryota,38H5S@33154|Opisthokonta,3NVMZ@4751|Fungi,3UZXQ@5204|Basidiomycota,228HN@155619|Agaricomycetes,3W40C@5338|Agaricales	3NVMZ@4751|Fungi	RecName: Full=Putative aryl-alcohol dehydrogenase C977.14c [Schizosaccharomyces pombe 972h-]	Aldo/keto reductase family
MDBOrad1_00546	2CMZJ@1|root,2QSY2@2759|Eukaryota,38DF4@33154|Opisthokonta,3NUPW@4751|Fungi,3UZSR@5204|Basidiomycota,226J3@155619|Agaricomycetes	3NUPW@4751|Fungi		Fungal specific transcription factor domain
MDBOrad1_00547	COG2335@1|root,KOG0758@1|root,KOG0758@2759|Eukaryota,KOG1437@2759|Eukaryota,38BD7@33154|Opisthokonta,3NTYD@4751|Fungi,3V7D0@5204|Basidiomycota,224MH@155619|Agaricomycetes	3NTYD@4751|Fungi	RecName: Full=Transforming growth factor-beta-induced protein ig-h3; Short=Beta ig-h3; AltName: Full=Kerato-epithelin; AltName: Full=RGD-containing collagen-associated protein; Short=RGD-CAP; Flags: Precursor [Homo sapiens]	Fasciclin domain	SP(Sec/SPI)	1
MDBOrad1_00548	COG1902@1|root,KOG0134@2759|Eukaryota,39RM1@33154|Opisthokonta,3NUUE@4751|Fungi,3V4KG@5204|Basidiomycota,226GP@155619|Agaricomycetes,3H3G0@355688|Agaricomycetes incertae sedis	3NUUE@4751|Fungi	RecName: Full=NADH:flavin oxidoreductase FG08077; AltName: Full=Butenolide biosynthesis cluster protein FG08077 [Fusarium graminearum PH-1]	NADH:flavin oxidoreductase / NADH oxidase family
MDBOrad1_00549	2C9D1@1|root,2SBXQ@2759|Eukaryota,3ABV4@33154|Opisthokonta,3P8W1@4751|Fungi,3V36Q@5204|Basidiomycota,2292I@155619|Agaricomycetes,3W76G@5338|Agaricales	3P8W1@4751|Fungi
MDBOrad1_00550	KOG4200@1|root,KOG4200@2759|Eukaryota,38FNK@33154|Opisthokonta,3P2SB@4751|Fungi,3V1EU@5204|Basidiomycota,229NJ@155619|Agaricomycetes,3H53I@355688|Agaricomycetes incertae sedis	3P2SB@4751|Fungi		Putative adipose-regulatory protein (Seipin)		3
MDBOrad1_00551	28MWJ@1|root,2QUEX@2759|Eukaryota,38VHW@33154|Opisthokonta,3NV2D@4751|Fungi,3UZIV@5204|Basidiomycota,227KU@155619|Agaricomycetes,3W4EP@5338|Agaricales	3NV2D@4751|Fungi
MDBOrad1_00552	29ZCE@1|root,2RJMH@2759|Eukaryota,3ATJN@33154|Opisthokonta,3PJQX@4751|Fungi,3V93X@5204|Basidiomycota,22CC8@155619|Agaricomycetes,3W8HI@5338|Agaricales	3PJQX@4751|Fungi		WW domain
MDBOrad1_00553	29ZCE@1|root,2RJMH@2759|Eukaryota,3ATJN@33154|Opisthokonta,3PJQX@4751|Fungi,3V93X@5204|Basidiomycota,22CC8@155619|Agaricomycetes,3W8HI@5338|Agaricales	3PJQX@4751|Fungi		WW domain		1
MDBOrad1_00554	2EXUK@1|root,2SZF8@2759|Eukaryota,3ATZZ@33154|Opisthokonta,3PHME@4751|Fungi,3V78P@5204|Basidiomycota,22CI1@155619|Agaricomycetes	3PHME@4751|Fungi
MDBOrad1_00555	2ERGS@1|root,2RSE3@2759|Eukaryota,3AXQ2@33154|Opisthokonta,3PIV6@4751|Fungi,3V82G@5204|Basidiomycota,22D7N@155619|Agaricomycetes,3W9IR@5338|Agaricales	3PIV6@4751|Fungi
MDBOrad1_00556	28MWJ@1|root,2QUEX@2759|Eukaryota,38VHW@33154|Opisthokonta,3NV2D@4751|Fungi,3UZIV@5204|Basidiomycota,227KU@155619|Agaricomycetes,3H0UC@355688|Agaricomycetes incertae sedis	3NV2D@4751|Fungi	RecName: Full=Uncharacterized protein YIL067C [Saccharomyces cerevisiae S288C]	LCCL domain		8
MDBOrad1_00557	KOG1938@1|root,KOG1938@2759|Eukaryota,38BMA@33154|Opisthokonta,3NYKG@4751|Fungi,3UYG7@5204|Basidiomycota,225Z5@155619|Agaricomycetes	3NYKG@4751|Fungi	RecName: Full=Transport protein particle subunit trs85-2; Short=TRAPP subunit trs85-2 [Schizosaccharomyces pombe 972h-]	ER-Golgi trafficking TRAPP I complex 85 kDa subunit
MDBOrad1_00558	COG2124@1|root,KOG0156@2759|Eukaryota,3AFEB@33154|Opisthokonta,3PCPA@4751|Fungi,3V487@5204|Basidiomycota,22BMD@155619|Agaricomycetes	3PCPA@4751|Fungi	RecName: Full=Cytochrome P450 monooxygenase 74 [Postia placenta Mad-698-R]	Cytochrome P450
MDBOrad1_00559
MDBOrad1_00560						2
MDBOrad1_00561	2CUIV@1|root,2S4E5@2759|Eukaryota,3A62W@33154|Opisthokonta,3P5M6@4751|Fungi,3V5T7@5204|Basidiomycota,22ACW@155619|Agaricomycetes,3H5XB@355688|Agaricomycetes incertae sedis	3P5M6@4751|Fungi	RecName: Full=Microsomal glutathione S-transferase 3; Short=Microsomal GST-3; AltName: Full=Glutathione peroxidase MGST3; AltName: Full=Microsomal glutathione S-transferase III; Short=Microsomal GST-III [Bos taurus]	MAPEG family		2
MDBOrad1_00562	COG2890@1|root,KOG2904@2759|Eukaryota,38S3X@33154|Opisthokonta,3Q37W@4751|Fungi,3V1KH@5204|Basidiomycota,2297C@155619|Agaricomycetes,3W6Z1@5338|Agaricales	3Q37W@4751|Fungi	RecName: Full=Release factor glutamine methyltransferase; Short=RF MTase; AltName: Full=N5-glutamine methyltransferase PrmC; AltName: Full=Protein-(glutamine-N5) MTase PrmC; AltName: Full=Protein-glutamine N-methyltransferase PrmC [Bacillus anthracis]	Methyltransferase domain
MDBOrad1_00563	2D4X6@1|root,2SWKJ@2759|Eukaryota,3AUWP@33154|Opisthokonta,3PGYA@4751|Fungi,3V7A6@5204|Basidiomycota,22CD9@155619|Agaricomycetes	3PGYA@4751|Fungi		F-box-like
MDBOrad1_00564
MDBOrad1_00565	2CP6U@1|root,2R0NS@2759|Eukaryota,3AYEW@33154|Opisthokonta,3PJJH@4751|Fungi,3V9QF@5204|Basidiomycota,22CU7@155619|Agaricomycetes,3W9C8@5338|Agaricales	3PJJH@4751|Fungi		F-box-like
MDBOrad1_00566	KOG0756@1|root,KOG0756@2759|Eukaryota,38DTJ@33154|Opisthokonta,3NTZB@4751|Fungi,3UZJR@5204|Basidiomycota,227I1@155619|Agaricomycetes,3W425@5338|Agaricales	3NTZB@4751|Fungi	RecName: Full=Citrate/oxoglutarate carrier protein; Short=Coc1p; AltName: Full=Mitochondrial DNA replication protein YHM2 [Saccharomyces cerevisiae S288C]	Mitochondrial carrier protein
MDBOrad1_00567	KOG1944@1|root,KOG1944@2759|Eukaryota,38CSF@33154|Opisthokonta,3NWCV@4751|Fungi,3V7DE@5204|Basidiomycota,22EBB@155619|Agaricomycetes	3NWCV@4751|Fungi		Mpv17 / PMP22 family		4
MDBOrad1_00568	2D23J@1|root,2SKAZ@2759|Eukaryota,3AIR3@33154|Opisthokonta,3PBSU@4751|Fungi,3V3JI@5204|Basidiomycota,228QX@155619|Agaricomycetes,3H3N5@355688|Agaricomycetes incertae sedis	3PBSU@4751|Fungi		Family of unknown function (DUF6534)		6
MDBOrad1_00569	COG2124@1|root,KOG0156@2759|Eukaryota,38BSU@33154|Opisthokonta,3P0Q5@4751|Fungi	3P0Q5@4751|Fungi	RecName: Full=Cytochrome P450 monooxygenase ppsD; AltName: Full=2,4'-dihydroxy-3'-methoxypropiophenone biosynthesis cluster protein D [Aspergillus oryzae RIB40]	Cytochrome P450
MDBOrad1_00570	COG2303@1|root,KOG1238@2759|Eukaryota,38UEK@33154|Opisthokonta,3NWDN@4751|Fungi,3UZB0@5204|Basidiomycota,226GI@155619|Agaricomycetes,3H2BV@355688|Agaricomycetes incertae sedis	3NWDN@4751|Fungi	RecName: Full=Dehydrogenase ARMGADRAFT_1018426; AltName: Full=Melleolide biosynthesis cluster protein ARMGADRAFT_1018426; Flags: Precursor [Armillaria gallica]	GMC oxidoreductase	SP(Sec/SPI)		yes
MDBOrad1_00571	COG2124@1|root,KOG0156@2759|Eukaryota,3AFEB@33154|Opisthokonta,3PCPA@4751|Fungi,3V487@5204|Basidiomycota,22BMD@155619|Agaricomycetes	3PCPA@4751|Fungi	RecName: Full=Cytochrome P450 monooxygenase 74 [Postia placenta Mad-698-R]	Cytochrome P450
MDBOrad1_00572	2CZB2@1|root,2S9FN@2759|Eukaryota,3A6QM@33154|Opisthokonta,3P5WC@4751|Fungi,3V5HZ@5204|Basidiomycota	3P5WC@4751|Fungi		Phospholipid methyltransferase		4
MDBOrad1_00573	2EEMN@1|root,2SNPR@2759|Eukaryota,3AJV3@33154|Opisthokonta,3PDK5@4751|Fungi,3V532@5204|Basidiomycota,229JP@155619|Agaricomycetes,3W9R7@5338|Agaricales	3PDK5@4751|Fungi			SP(Sec/SPI)		yes
MDBOrad1_00574	COG2124@1|root,KOG0157@2759|Eukaryota,39S30@33154|Opisthokonta,3PC7B@4751|Fungi,3V47W@5204|Basidiomycota,224Z8@155619|Agaricomycetes,3H1H1@355688|Agaricomycetes incertae sedis	39S30@33154|Opisthokonta	RecName: Full=Cytochrome P450 monooxygenase 205 [Postia placenta Mad-698-R]	Cytochrome P450		1
MDBOrad1_00575	2CNH8@1|root,2QWAB@2759|Eukaryota,3A0IT@33154|Opisthokonta,3P0KC@4751|Fungi,3VCJZ@5204|Basidiomycota,227CF@155619|Agaricomycetes,3WA54@5338|Agaricales	3P0KC@4751|Fungi
MDBOrad1_00576	2DDJN@1|root,2S5N8@2759|Eukaryota,3A78Z@33154|Opisthokonta,3P5PK@4751|Fungi,3V1YX@5204|Basidiomycota,2253W@155619|Agaricomycetes	3P5PK@4751|Fungi		Putative zinc-finger of transcription factor IIIC complex
MDBOrad1_00577
MDBOrad1_00578	2ATRY@1|root,2RZSK@2759|Eukaryota,39IUD@33154|Opisthokonta,3NWGA@4751|Fungi,3QQCK@4890|Ascomycota,20FC0@147545|Eurotiomycetes,3B3J2@33183|Onygenales,3FSIV@34384|Arthrodermataceae	3NWGA@4751|Fungi		Family of unknown function (DUF6604)
MDBOrad1_00579	COG0507@1|root,KOG0987@2759|Eukaryota	KOG0987@2759|Eukaryota		Domain of unknown function (DUF6570)
MDBOrad1_00580	COG0507@1|root,KOG0987@2759|Eukaryota,3ABUV@33154|Opisthokonta,3P9IP@4751|Fungi,3V411@5204|Basidiomycota,22BIK@155619|Agaricomycetes,3W8V2@5338|Agaricales	3P9IP@4751|Fungi	RecName: Full=ATP-dependent DNA helicase PIF1; AltName: Full=DNA repair and recombination helicase PIF1 [Candida albicans SC5314]	PIF1-like helicase
MDBOrad1_00581	KOG1797@1|root,KOG1797@2759|Eukaryota,38ERE@33154|Opisthokonta,3Q386@4751|Fungi,3UZBK@5204|Basidiomycota,224TM@155619|Agaricomycetes,3W5XB@5338|Agaricales	3Q386@4751|Fungi		Secretory pathway protein Sec39
MDBOrad1_00582	COG0388@1|root,KOG0805@2759|Eukaryota,38H7S@33154|Opisthokonta,3NZ7Z@4751|Fungi,3V1F7@5204|Basidiomycota,22BPU@155619|Agaricomycetes	3NZ7Z@4751|Fungi	RecName: Full=Cyanide hydratase; Short=CHT; AltName: Full=Cyanide-degrading nitrilase; AltName: Full=Formamide hydrolyase; AltName: Full=NitAg [Armillaria gallica]	Carbon-nitrogen hydrolase
MDBOrad1_00583
MDBOrad1_00584	COG1064@1|root,KOG0023@2759|Eukaryota,390GY@33154|Opisthokonta,3NW0B@4751|Fungi,3UYYZ@5204|Basidiomycota,227ER@155619|Agaricomycetes,3W4M4@5338|Agaricales	3NW0B@4751|Fungi	RecName: Full=Alcohol dehydrogenase [Schizosaccharomyces pombe 972h-]	Zinc-binding dehydrogenase
MDBOrad1_00585	COG1064@1|root,KOG0023@2759|Eukaryota,390GY@33154|Opisthokonta,3NW0B@4751|Fungi,3UYYZ@5204|Basidiomycota,227ER@155619|Agaricomycetes,3W4M4@5338|Agaricales	3NW0B@4751|Fungi	RecName: Full=Alcohol dehydrogenase [Schizosaccharomyces pombe 972h-]	Alcohol dehydrogenase GroES-like domain
MDBOrad1_00586	COG1374@1|root,KOG3492@2759|Eukaryota,38ER8@33154|Opisthokonta,3NVZ1@4751|Fungi,3UYA8@5204|Basidiomycota,227JQ@155619|Agaricomycetes,3W41X@5338|Agaricales	3NVZ1@4751|Fungi	RecName: Full=60S ribosome subunit biogenesis protein nip7 [Schizosaccharomyces pombe 972h-]	UPF0113 Pre-PUA domain
MDBOrad1_00587	KOG1972@1|root,KOG1972@2759|Eukaryota,38D5B@33154|Opisthokonta,3NYEV@4751|Fungi,3UYIQ@5204|Basidiomycota,226PQ@155619|Agaricomycetes,3W5H0@5338|Agaricales	3NYEV@4751|Fungi	RecName: Full=Nuclear exosome regulator NRDE2; AltName: Full=Protein NRDE2 homolog [Homo sapiens]	NRDE-2, necessary for RNA interference
MDBOrad1_00588	2CNH8@1|root,2QWAB@2759|Eukaryota,3A0IT@33154|Opisthokonta,3P0KC@4751|Fungi,3VCJZ@5204|Basidiomycota,227CF@155619|Agaricomycetes,3WA54@5338|Agaricales	3P0KC@4751|Fungi
MDBOrad1_00589	2CP6U@1|root,2R0NS@2759|Eukaryota,3AYEW@33154|Opisthokonta,3PJJH@4751|Fungi,3V9QF@5204|Basidiomycota,22CU7@155619|Agaricomycetes,3W9C8@5338|Agaricales	3PJJH@4751|Fungi		F-box-like
MDBOrad1_00590	2DIDY@1|root,2S5YH@2759|Eukaryota,39T64@33154|Opisthokonta,3NXRZ@4751|Fungi,3V383@5204|Basidiomycota,226GW@155619|Agaricomycetes,3W35J@5338|Agaricales	3NXRZ@4751|Fungi
MDBOrad1_00591	2EBP5@1|root,2SKDZ@2759|Eukaryota,3AGI2@33154|Opisthokonta,3PCV1@4751|Fungi,3V3Q8@5204|Basidiomycota,227NM@155619|Agaricomycetes,3W5SU@5338|Agaricales	3PCV1@4751|Fungi
MDBOrad1_00592
MDBOrad1_00593	COG0177@1|root,KOG1921@2759|Eukaryota,38GGU@33154|Opisthokonta,3NXI5@4751|Fungi,3UYPQ@5204|Basidiomycota,226M7@155619|Agaricomycetes	3NXI5@4751|Fungi	RecName: Full=Endonuclease III homolog; AltName: Full=Bifunctional DNA N-glycosylase/DNA-(apurinic or apyrimidinic site) lyase; Short=DNA glycosylase/AP lyase [Schizosaccharomyces pombe 972h-]	HhH-GPD superfamily base excision DNA repair protein
MDBOrad1_00594	2E60F@1|root,2SCS3@2759|Eukaryota,3ACM0@33154|Opisthokonta,3P8TN@4751|Fungi,3V2UY@5204|Basidiomycota,22A6A@155619|Agaricomycetes,3W7U5@5338|Agaricales	3P8TN@4751|Fungi		Cgr1 family
MDBOrad1_00595	2CNH8@1|root,2QWAB@2759|Eukaryota,3A0IT@33154|Opisthokonta,3P0KC@4751|Fungi,3VCJZ@5204|Basidiomycota,227CF@155619|Agaricomycetes,3WA54@5338|Agaricales	3P0KC@4751|Fungi
MDBOrad1_00596				Interferon-induced 6-16 family
MDBOrad1_00597	2CNH8@1|root,2QWAB@2759|Eukaryota,3A0IT@33154|Opisthokonta,3P0KC@4751|Fungi,3VCJZ@5204|Basidiomycota,227CF@155619|Agaricomycetes,3WA54@5338|Agaricales	3P0KC@4751|Fungi
MDBOrad1_00598	KOG0583@1|root,KOG0583@2759|Eukaryota,38PW2@33154|Opisthokonta,3NURV@4751|Fungi,3UZNP@5204|Basidiomycota,225CM@155619|Agaricomycetes,3W9SB@5338|Agaricales	3NURV@4751|Fungi	RecName: Full=Negative regulator of sexual conjugation and meiosis [Schizosaccharomyces pombe 972h-]	Protein kinase domain
MDBOrad1_00599	2CNH8@1|root,2QWAB@2759|Eukaryota,3A0IT@33154|Opisthokonta,3P0KC@4751|Fungi,3VCJZ@5204|Basidiomycota,227CF@155619|Agaricomycetes,3WA54@5338|Agaricales	3P0KC@4751|Fungi
MDBOrad1_00600	KOG2034@1|root,KOG2034@2759|Eukaryota,38C0J@33154|Opisthokonta,3NV4E@4751|Fungi,3UYXJ@5204|Basidiomycota,227K1@155619|Agaricomycetes,3W4A5@5338|Agaricales	3NV4E@4751|Fungi	RecName: Full=Vacuolar protein sorting-associated protein 18 homolog [Danio rerio]	Cytochrome P450
MDBOrad1_00601	2E15A@1|root,2S8HK@2759|Eukaryota,3AAES@33154|Opisthokonta,3Q526@4751|Fungi,3VCD3@5204|Basidiomycota,224Z4@155619|Agaricomycetes,3W6H4@5338|Agaricales	3Q526@4751|Fungi		Histidine phosphatase superfamily (branch 1)
MDBOrad1_00602	2CNH8@1|root,2QWAB@2759|Eukaryota,3A0IT@33154|Opisthokonta,3P0KC@4751|Fungi,3VCJZ@5204|Basidiomycota,227CF@155619|Agaricomycetes,3WA54@5338|Agaricales	3P0KC@4751|Fungi
MDBOrad1_00603	COG0412@1|root,2QQFN@2759|Eukaryota,38ESF@33154|Opisthokonta,3NV2Z@4751|Fungi,3UZSW@5204|Basidiomycota,2267K@155619|Agaricomycetes,3H2GJ@355688|Agaricomycetes incertae sedis	3NV2Z@4751|Fungi	RecName: Full=Putative carboxymethylenebutenolidase; AltName: Full=Dienelactone hydrolase; Short=DLH [Saccharomyces cerevisiae S288C]	Dienelactone hydrolase family
MDBOrad1_00604	COG2124@1|root,KOG0156@2759|Eukaryota,38BSU@33154|Opisthokonta,3NWDQ@4751|Fungi,3V3CT@5204|Basidiomycota,224J1@155619|Agaricomycetes,3W8RR@5338|Agaricales	3NWDQ@4751|Fungi	RecName: Full=Cytochrome P450 monooxygenase 67 [Postia placenta Mad-698-R]	Cytochrome P450	SP(Sec/SPI)	1
MDBOrad1_00605	2CNH8@1|root,2QWAB@2759|Eukaryota,3A0IT@33154|Opisthokonta,3P0KC@4751|Fungi,3VCJZ@5204|Basidiomycota,227CF@155619|Agaricomycetes,3WA54@5338|Agaricales	3P0KC@4751|Fungi
MDBOrad1_00606	KOG0583@1|root,KOG0583@2759|Eukaryota,38PW2@33154|Opisthokonta,3NURV@4751|Fungi,3UZNP@5204|Basidiomycota,225CM@155619|Agaricomycetes,3W9SB@5338|Agaricales	3NURV@4751|Fungi	RecName: Full=Negative regulator of sexual conjugation and meiosis [Schizosaccharomyces pombe 972h-]	Protein kinase domain
MDBOrad1_00607	COG0465@1|root,KOG0731@2759|Eukaryota,38FRA@33154|Opisthokonta,3NV7Y@4751|Fungi,3UXV4@5204|Basidiomycota,226WX@155619|Agaricomycetes,3W51T@5338|Agaricales	3NV7Y@4751|Fungi	RecName: Full=Mitochondrial respiratory chain complexes assembly protein rca1 [Schizosaccharomyces pombe 972h-]	Peptidase family M41
MDBOrad1_00608	COG0477@1|root,KOG2533@2759|Eukaryota,3AI3I@33154|Opisthokonta,3PCZX@4751|Fungi,3V3I7@5204|Basidiomycota,225P5@155619|Agaricomycetes,3W4AF@5338|Agaricales	3PCZX@4751|Fungi	RecName: Full=MFS-type transporter cnsO; AltName: Full=Communesin biosynthesis cluster protein O [Penicillium expansum]	Major Facilitator Superfamily		12
MDBOrad1_00609	COG0138@1|root,2QSQN@2759|Eukaryota,39XGJ@33154|Opisthokonta,3NWXB@4751|Fungi,3V1QR@5204|Basidiomycota,226ZK@155619|Agaricomycetes,3W3HR@5338|Agaricales	3NWXB@4751|Fungi	RecName: Full=Uncharacterized urease accessory protein ureD-like [Schizosaccharomyces pombe 972h-]	UreD urease accessory protein
MDBOrad1_00610	COG0596@1|root,KOG4178@2759|Eukaryota,3AKGV@33154|Opisthokonta,3NW5Y@4751|Fungi,3V92B@5204|Basidiomycota,22BJB@155619|Agaricomycetes,3W9TC@5338|Agaricales	3NW5Y@4751|Fungi	RecName: Full=Putative hydrolase LipZ [Mycobacterium tuberculosis CDC1551]_x0001_P9WLR1.1 RecName: Full=Putative hydrolase LipZ [Mycobacterium tuberculosis H37Rv]	alpha/beta hydrolase fold	SP(Sec/SPI)		yes
MDBOrad1_00611	28K6I@1|root,2QSM3@2759|Eukaryota,39WFJ@33154|Opisthokonta,3NY7H@4751|Fungi,3V2WH@5204|Basidiomycota,22BTI@155619|Agaricomycetes,3W9RZ@5338|Agaricales	3NY7H@4751|Fungi	RecName: Full=Probable pectate lyase F; Flags: Precursor [Aspergillus fischeri NRRL 181]	Pectate lyase	SP(Sec/SPI)		yes
MDBOrad1_00612	KOG2445@1|root,KOG2445@2759|Eukaryota,38GGF@33154|Opisthokonta,3NU37@4751|Fungi,3V1J9@5204|Basidiomycota,224GY@155619|Agaricomycetes,3W3I2@5338|Agaricales	3NU37@4751|Fungi	RecName: Full=Nucleoporin SEH1; AltName: Full=Nuclear pore protein SEH1; AltName: Full=SEC13 homolog 1 [Saccharomyces cerevisiae S288C]	WD domain, G-beta repeat
MDBOrad1_00613	COG1902@1|root,KOG0134@2759|Eukaryota,38EN0@33154|Opisthokonta,3NUI7@4751|Fungi,3V05D@5204|Basidiomycota,2271B@155619|Agaricomycetes,3W6IF@5338|Agaricales	3NUI7@4751|Fungi	RecName: Full=Chanoclavine-I aldehyde reductase fgaOx3; AltName: Full=Isofumigaclavine biosynthesis protein fgaOx3; AltName: Full=Old yellow enzyme homolog fgaOx3; Short=OYE fgaOx3 [Penicillium roqueforti FM164]	NADH:flavin oxidoreductase / NADH oxidase family
MDBOrad1_00614	28QCU@1|root,2QX1K@2759|Eukaryota,39IW9@33154|Opisthokonta,3NZ18@4751|Fungi,3V0MK@5204|Basidiomycota,224UY@155619|Agaricomycetes,3W6FG@5338|Agaricales	3NZ18@4751|Fungi	RecName: Full=Protein byr4 [Schizosaccharomyces pombe 972h-]
MDBOrad1_00615	COG0596@1|root,KOG4178@2759|Eukaryota,3A0W1@33154|Opisthokonta,3P24U@4751|Fungi,3V3UG@5204|Basidiomycota,224V8@155619|Agaricomycetes,3W6V3@5338|Agaricales	3P24U@4751|Fungi	RecName: Full=Mesoderm-specific transcript homolog protein; AltName: Full=Paternally-expressed gene 1 protein [Bos taurus]	alpha/beta hydrolase fold
MDBOrad1_00616
MDBOrad1_00617	COG0596@1|root,KOG4178@2759|Eukaryota,3A0W1@33154|Opisthokonta,3P24U@4751|Fungi,3V3UG@5204|Basidiomycota,224V8@155619|Agaricomycetes,3H2BU@355688|Agaricomycetes incertae sedis	3P24U@4751|Fungi
MDBOrad1_00618	COG0596@1|root,KOG4178@2759|Eukaryota,3A0W1@33154|Opisthokonta,3P24U@4751|Fungi,3V3UG@5204|Basidiomycota,224V8@155619|Agaricomycetes,3W6V3@5338|Agaricales	3P24U@4751|Fungi	RecName: Full=Putative hydrolase LipZ [Mycobacterium tuberculosis CDC1551]_x0001_P9WLR1.1 RecName: Full=Putative hydrolase LipZ [Mycobacterium tuberculosis H37Rv]	alpha/beta hydrolase fold	SP(Sec/SPI)		yes
MDBOrad1_00619	COG0596@1|root,KOG4178@2759|Eukaryota,3AKGV@33154|Opisthokonta,3NW5Y@4751|Fungi,3V92B@5204|Basidiomycota,22BJB@155619|Agaricomycetes,3W9TC@5338|Agaricales	3NW5Y@4751|Fungi	RecName: Full=Putative hydrolase LipZ [Mycobacterium tuberculosis CDC1551]_x0001_P9WLR1.1 RecName: Full=Putative hydrolase LipZ [Mycobacterium tuberculosis H37Rv]	alpha/beta hydrolase fold	SP(Sec/SPI)		yes
MDBOrad1_00620	COG0596@1|root,KOG4178@2759|Eukaryota,3AKGV@33154|Opisthokonta,3NW5Y@4751|Fungi,3V92B@5204|Basidiomycota,22BJB@155619|Agaricomycetes,3W9TC@5338|Agaricales	3NW5Y@4751|Fungi	RecName: Full=Putative hydrolase LipZ [Mycobacterium tuberculosis CDC1551]_x0001_P9WLR1.1 RecName: Full=Putative hydrolase LipZ [Mycobacterium tuberculosis H37Rv]	alpha/beta hydrolase fold	SP(Sec/SPI)		yes
MDBOrad1_00621	COG0596@1|root,KOG4178@2759|Eukaryota,3AKGV@33154|Opisthokonta,3NW5Y@4751|Fungi,3V92B@5204|Basidiomycota,22BJB@155619|Agaricomycetes,3W9TC@5338|Agaricales	3NW5Y@4751|Fungi	RecName: Full=Haloalkane dehalogenase [Mesorhizobium japonicum MAFF 303099]	alpha/beta hydrolase fold
MDBOrad1_00622	COG1132@1|root,KOG0054@2759|Eukaryota,38CH6@33154|Opisthokonta,3NYMJ@4751|Fungi,3UYHA@5204|Basidiomycota,224TS@155619|Agaricomycetes,3H3PK@355688|Agaricomycetes incertae sedis	3NYMJ@4751|Fungi	RecName: Full=Multidrug resistance protein fer6; AltName: Full=ATP-binding cassette sub-family C member fer6; AltName: Full=Fe-regulated protein 6; Flags: Precursor [Ustilago maydis 521]	ABC transporter transmembrane region		8
MDBOrad1_00623	2D205@1|root,2SJY0@2759|Eukaryota,3AIPI@33154|Opisthokonta,3PBY4@4751|Fungi,3V3S5@5204|Basidiomycota,22BKC@155619|Agaricomycetes,3W8TV@5338|Agaricales	3PBY4@4751|Fungi	RecName: Full=NRPS-independent siderophore synthetase rfs; Short=NIS rfs; AltName: Full=Rhizoferrin biosynthesis protein rfs [Rhizopus delemar RA 99-880]	IucA / IucC family
MDBOrad1_00624	KOG4497@1|root,KOG4497@2759|Eukaryota,38DYS@33154|Opisthokonta,3NYMS@4751|Fungi,3V04R@5204|Basidiomycota,225TZ@155619|Agaricomycetes,3W4E1@5338|Agaricales	3NYMS@4751|Fungi		Anaphase-promoting complex subunit 4 WD40 domain
MDBOrad1_00625	KOG0255@1|root,KOG0255@2759|Eukaryota,38D5E@33154|Opisthokonta,3NTW3@4751|Fungi,3UY1X@5204|Basidiomycota,227HF@155619|Agaricomycetes,3W4YS@5338|Agaricales	3NTW3@4751|Fungi	RecName: Full=Efflux pump FUBT; AltName: Full=Fusaric acid biosynthesis protein T; AltName: Full=Fusaric acid transporter [Fusarium oxysporum]	Major Facilitator Superfamily		12
MDBOrad1_00626	KOG0255@1|root,KOG0255@2759|Eukaryota,38D5E@33154|Opisthokonta,3NTW3@4751|Fungi,3UY1X@5204|Basidiomycota,227HF@155619|Agaricomycetes,3W4YS@5338|Agaricales	3NTW3@4751|Fungi	RecName: Full=Major facilitator superfamily multidrug transporter mdrA [Aspergillus fumigatus Af293]	Major Facilitator Superfamily		12
MDBOrad1_00627	2D378@1|root,2SQFW@2759|Eukaryota,3AP55@33154|Opisthokonta,3PEWD@4751|Fungi,3V5YD@5204|Basidiomycota,22DV9@155619|Agaricomycetes	3PEWD@4751|Fungi	RecName: Full=30S ribosomal protein S17 [Erwinia tasmaniensis Et1/99]	Ribosomal protein S17
MDBOrad1_00628	COG1382@1|root,KOG3478@2759|Eukaryota,3A8ES@33154|Opisthokonta,3P59T@4751|Fungi,3V28G@5204|Basidiomycota,22AGJ@155619|Agaricomycetes,3W814@5338|Agaricales	3P59T@4751|Fungi	RecName: Full=Prefoldin subunit 6; AltName: Full=Protein Ke2 [Mus musculus]	Prefoldin subunit
MDBOrad1_00629	COG0405@1|root,KOG2410@2759|Eukaryota,38ENY@33154|Opisthokonta,3NVWF@4751|Fungi,3UY8B@5204|Basidiomycota,226K1@155619|Agaricomycetes,3H1G5@355688|Agaricomycetes incertae sedis	3NVWF@4751|Fungi	RecName: Full=Glutathione hydrolase proenzyme; AltName: Full=Gamma-glutamyltranspeptidase proenzyme; Contains: RecName: Full=Glutathione hydrolase large chain; Contains: RecName: Full=Glutathione hydrolase small chain; Flags: Precursor [Pseudomonas sp. A14]	Gamma-glutamyltranspeptidase
MDBOrad1_00630	COG0631@1|root,KOG0698@2759|Eukaryota,38GMV@33154|Opisthokonta,3NZN0@4751|Fungi,3UZKV@5204|Basidiomycota,224V5@155619|Agaricomycetes,3W3A7@5338|Agaricales	3NZN0@4751|Fungi	RecName: Full=Protein phosphatase 2C homolog 4; Short=PP2C-4 [Schizosaccharomyces pombe 972h-]	Protein phosphatase 2C
MDBOrad1_00631	KOG2910@1|root,KOG2910@2759|Eukaryota,39TG5@33154|Opisthokonta,3P2SD@4751|Fungi,3V0X9@5204|Basidiomycota,2294S@155619|Agaricomycetes,3W7K1@5338|Agaricales	3P2SD@4751|Fungi	RecName: Full=Charged multivesicular body protein 6; AltName: Full=Chromatin-modifying protein 6 [Pongo abelii]	Snf7
MDBOrad1_00632	KOG0254@1|root,KOG0254@2759|Eukaryota,38BKC@33154|Opisthokonta,3NWXF@4751|Fungi,3UY6D@5204|Basidiomycota,227KK@155619|Agaricomycetes,3W4EF@5338|Agaricales	3NWXF@4751|Fungi	RecName: Full=High-affinity glucose transporter [Kluyveromyces lactis NRRL Y-1140]	Sugar (and other) transporter		9
MDBOrad1_00633	2E4N0@1|root,2SBHE@2759|Eukaryota,3A7E3@33154|Opisthokonta,3P54B@4751|Fungi,3V2VA@5204|Basidiomycota,22AQT@155619|Agaricomycetes,3W8J5@5338|Agaricales	3P54B@4751|Fungi	RecName: Full=Mitochondrial import protein 2 [Saccharomyces cerevisiae S288C]	Mitochondrial import 2
MDBOrad1_00634	KOG4197@1|root,KOG4197@2759|Eukaryota,3A0MU@33154|Opisthokonta,3NW1K@4751|Fungi,3VBP0@5204|Basidiomycota,22ES6@155619|Agaricomycetes,3W9YH@5338|Agaricales	3NW1K@4751|Fungi		PPR repeat family
MDBOrad1_00635	COG0652@1|root,KOG0883@2759|Eukaryota,38E53@33154|Opisthokonta,3NUAM@4751|Fungi,3UY5A@5204|Basidiomycota,227FZ@155619|Agaricomycetes,3W434@5338|Agaricales	3NUAM@4751|Fungi	RecName: Full=Peptidyl-prolyl cis-trans isomerase-like 2; Short=PPIase; AltName: Full=Cyclophilin-60; AltName: Full=Cyclophilin-like protein Cyp-60; AltName: Full=RING-type E3 ubiquitin transferase isomerase-like 2; AltName: Full=Rotamase [Cryptococcus neoformans var. neoformans JEC21]_x0001_P0CP91.1 RecName: Full=Peptidyl-prolyl cis-trans isomerase-like 2; Short=PPIase; AltName: Full=Cyclophilin…	Cyclophilin type peptidyl-prolyl cis-trans isomerase/CLD
MDBOrad1_00636
MDBOrad1_00637
MDBOrad1_00638
MDBOrad1_00639	COG0154@1|root,KOG1211@2759|Eukaryota,38GN4@33154|Opisthokonta,3NVZX@4751|Fungi,3UZQA@5204|Basidiomycota,224BB@155619|Agaricomycetes,3H2MH@355688|Agaricomycetes incertae sedis	3NVZX@4751|Fungi	RecName: Full=Glutamyl-tRNA(Gln) amidotransferase subunit A, mitochondrial; Short=Glu-AdT subunit A [Coprinopsis cinerea okayama7#130]	Amidase
MDBOrad1_00640	29J79@1|root,2RSFB@2759|Eukaryota,3AYR9@33154|Opisthokonta,3PG4W@4751|Fungi,3V6BU@5204|Basidiomycota,22DBY@155619|Agaricomycetes,3W9BG@5338|Agaricales	3PG4W@4751|Fungi		RING-type zinc-finger
MDBOrad1_00641	2CM7K@1|root,2QPIW@2759|Eukaryota,39006@33154|Opisthokonta,3P02C@4751|Fungi,3UZXW@5204|Basidiomycota,2YFIH@29000|Pucciniomycotina	3P02C@4751|Fungi		L-lysine 6-monooxygenase/L-ornithine 5-monooxygenase
MDBOrad1_00642	29J79@1|root,2RSFB@2759|Eukaryota,3AYR9@33154|Opisthokonta,3PG4W@4751|Fungi,3V6BU@5204|Basidiomycota,22DBY@155619|Agaricomycetes,3W9BG@5338|Agaricales	3PG4W@4751|Fungi		Zinc finger, C3HC4 type (RING finger)
MDBOrad1_00643	2EX7W@1|root,2SXTQ@2759|Eukaryota,3AUXI@33154|Opisthokonta,3PHJH@4751|Fungi,3V72V@5204|Basidiomycota,22DIZ@155619|Agaricomycetes,3W8GF@5338|Agaricales	3PHJH@4751|Fungi
MDBOrad1_00644	2CXIG@1|root,2RXUE@2759|Eukaryota,39SEM@33154|Opisthokonta,3P0GC@4751|Fungi,3V0H9@5204|Basidiomycota,225XI@155619|Agaricomycetes,3W5C3@5338|Agaricales	3P0GC@4751|Fungi		Domain of unknown function (DUF4203)		6
MDBOrad1_00645	28NPR@1|root,2QV9H@2759|Eukaryota,39KPJ@33154|Opisthokonta,3Q52Y@4751|Fungi,3UYXU@5204|Basidiomycota,22784@155619|Agaricomycetes	3Q52Y@4751|Fungi				1
MDBOrad1_00646	COG0469@1|root,KOG2323@2759|Eukaryota,38BPM@33154|Opisthokonta,3NUBE@4751|Fungi,3UZ5S@5204|Basidiomycota,2270T@155619|Agaricomycetes,3W3QQ@5338|Agaricales	3NUBE@4751|Fungi	RecName: Full=Pyruvate kinase; Short=PK [Agaricus bisporus]	Pyruvate kinase, barrel domain
MDBOrad1_00647	28K92@1|root,2QSPR@2759|Eukaryota,38CME@33154|Opisthokonta,3NY0X@4751|Fungi,3V41N@5204|Basidiomycota,22508@155619|Agaricomycetes,3H715@355688|Agaricomycetes incertae sedis	3NY0X@4751|Fungi		Reverse transcriptase (RNA-dependent DNA polymerase)
MDBOrad1_00648	2CZ1M@1|root,2S7UJ@2759|Eukaryota,39J9G@33154|Opisthokonta,3P5UR@4751|Fungi,3V4RH@5204|Basidiomycota,226DY@155619|Agaricomycetes	3P5UR@4751|Fungi	RecName: Full=ATP-dependent RNA helicase DBP1; AltName: Full=DEAD box protein 1; AltName: Full=Helicase CA1 [Saccharomyces cerevisiae S288C]	DEAD/DEAH box helicase
MDBOrad1_00649	COG1112@1|root,KOG0988@1|root,KOG0988@2759|Eukaryota,KOG1802@2759|Eukaryota,38HG8@33154|Opisthokonta,3NU22@4751|Fungi,3V3QE@5204|Basidiomycota,227V7@155619|Agaricomycetes,3W8PE@5338|Agaricales	3NU22@4751|Fungi	RecName: Full=Probable RNA-dependent RNA polymerase 1; Short=OsRDR1 [Oryza sativa Japonica Group]	RNA dependent RNA polymerase
MDBOrad1_00650	2EJG8@1|root,2SPN2@2759|Eukaryota,3A47F@33154|Opisthokonta,3P4G1@4751|Fungi,3V5Z2@5204|Basidiomycota,22A3I@155619|Agaricomycetes	3P4G1@4751|Fungi		AAA domain
MDBOrad1_00651	KOG0758@1|root,KOG0758@2759|Eukaryota,3ATVT@33154|Opisthokonta,3P0V0@4751|Fungi,3UY41@5204|Basidiomycota,2258J@155619|Agaricomycetes,3W6GC@5338|Agaricales	3P0V0@4751|Fungi	RecName: Full=Mitochondrial substrate carrier family protein G; AltName: Full=Solute carrier family 25 member 20 homolog A [Dictyostelium discoideum]	Mitochondrial carrier protein
MDBOrad1_00652
MDBOrad1_00653	2BY93@1|root,2S2GY@2759|Eukaryota,3A48G@33154|Opisthokonta,3P469@4751|Fungi,3V1H4@5204|Basidiomycota,228B2@155619|Agaricomycetes,3W44M@5338|Agaricales	3P469@4751|Fungi
MDBOrad1_00654	2F1PC@1|root,2T2NK@2759|Eukaryota,3ATM2@33154|Opisthokonta,3PHYC@4751|Fungi,3V6UM@5204|Basidiomycota,22D8Q@155619|Agaricomycetes,3W9KW@5338|Agaricales	3PHYC@4751|Fungi		MYND finger
MDBOrad1_00655	COG0036@1|root,KOG3111@2759|Eukaryota,38G6J@33154|Opisthokonta,3NX48@4751|Fungi,3UZH7@5204|Basidiomycota,2281H@155619|Agaricomycetes,3H4D9@355688|Agaricomycetes incertae sedis	3NX48@4751|Fungi	RecName: Full=Ribulose-phosphate 3-epimerase; AltName: Full=Pentose-5-phosphate 3-epimerase; Short=PPE; AltName: Full=RPE [Eremothecium gossypii ATCC 10895]	Ribulose-phosphate 3 epimerase family
MDBOrad1_00656					SP(Sec/SPI)	1
MDBOrad1_00657					SP(Sec/SPI)	1
MDBOrad1_00658	KOG3469@1|root,KOG3469@2759|Eukaryota,3A3WN@33154|Opisthokonta,3P7D2@4751|Fungi,3V2FV@5204|Basidiomycota,22AAA@155619|Agaricomycetes,3W7TT@5338|Agaricales	3P7D2@4751|Fungi	RecName: Full=Cytochrome c oxidase subunit 13, mitochondrial; AltName: Full=Cytochrome c oxidase polypeptide VIa; Flags: Precursor [Schizosaccharomyces pombe 972h-]	Cytochrome c oxidase subunit VIa
MDBOrad1_00659	COG5116@1|root,KOG2062@2759|Eukaryota,38E5Y@33154|Opisthokonta,3NUMK@4751|Fungi,3UZSP@5204|Basidiomycota,227KG@155619|Agaricomycetes,3W3ZE@5338|Agaricales	3NUMK@4751|Fungi	RecName: Full=26S proteasome non-ATPase regulatory subunit 1 homolog A; AltName: Full=26S proteasome regulatory subunit RPN2a; Short=AtRPN2a; AltName: Full=26S proteasome regulatory subunit S1 homolog A [Arabidopsis thaliana]	26S proteasome regulatory subunit RPN2 C-terminal domain
MDBOrad1_00660	COG0111@1|root,KOG0068@2759|Eukaryota,38CND@33154|Opisthokonta,3NY1D@4751|Fungi,3V49J@5204|Basidiomycota,227ET@155619|Agaricomycetes,3H2K3@355688|Agaricomycetes incertae sedis	3NY1D@4751|Fungi	RecName: Full=D-3-phosphoglycerate dehydrogenase; Short=PGDH [Methanothermobacter thermautotrophicus str. Delta H]	D-isomer specific 2-hydroxyacid dehydrogenase, NAD binding domain
MDBOrad1_00661	COG5064@1|root,KOG0166@2759|Eukaryota,38CKN@33154|Opisthokonta,3NU5E@4751|Fungi,3UXW7@5204|Basidiomycota,2250K@155619|Agaricomycetes,3W5FY@5338|Agaricales	3NU5E@4751|Fungi	RecName: Full=Importin subunit alpha; AltName: Full=Karyopherin alpha [Penicillium rubens Wisconsin 54-1255]	Armadillo/beta-catenin-like repeat
MDBOrad1_00662	COG1958@1|root,KOG1775@2759|Eukaryota,3A5M3@33154|Opisthokonta,3P554@4751|Fungi,3V1VG@5204|Basidiomycota,22ACV@155619|Agaricomycetes,3H5X0@355688|Agaricomycetes incertae sedis	3P554@4751|Fungi	RecName: Full=U6 snRNA-associated Sm-like protein LSm5 [Mus musculus]_x0001_Q2HJH0.3 RecName: Full=U6 snRNA-associated Sm-like protein LSm5 [Bos taurus]_x0001_Q5R628.3 RecName: Full=U6 snRNA-associated Sm-like protein LSm5 [Pongo abelii]_x0001_Q9Y4Y9.3 RecName: Full=U6 snRNA-associated Sm-like protein LSm5 [Homo sapiens]	LSM domain
MDBOrad1_00663	COG4281@1|root,KOG0817@2759|Eukaryota,38GPF@33154|Opisthokonta,3P7FE@4751|Fungi,3V2PZ@5204|Basidiomycota,229BS@155619|Agaricomycetes,3W7BN@5338|Agaricales	3P7FE@4751|Fungi	RecName: Full=Ankyrin repeat-containing protein P1E11.10 [Schizosaccharomyces pombe 972h-]	Acyl CoA binding protein
MDBOrad1_00664	2D7VS@1|root,2T7NE@2759|Eukaryota,3920H@33154|Opisthokonta,3PHKS@4751|Fungi,3V6PR@5204|Basidiomycota,22DPD@155619|Agaricomycetes,3W74K@5338|Agaricales	3PHKS@4751|Fungi			SP(Sec/SPI)		yes
MDBOrad1_00665	COG0228@1|root,KOG3419@2759|Eukaryota,3AQ6Y@33154|Opisthokonta,3PFN7@4751|Fungi,3V6B8@5204|Basidiomycota,22ASW@155619|Agaricomycetes	3PFN7@4751|Fungi	RecName: Full=30S ribosomal protein S16 [Ehrlichia ruminantium str. Welgevonden]	Ribosomal protein S16
MDBOrad1_00666	COG0074@1|root,KOG1255@2759|Eukaryota,38DG1@33154|Opisthokonta,3NWU7@4751|Fungi,3UZ8K@5204|Basidiomycota,2262G@155619|Agaricomycetes,3H49W@355688|Agaricomycetes incertae sedis	3NWU7@4751|Fungi	RecName: Full=Succinate--CoA ligase [ADP/GDP-forming] subunit alpha, mitochondrial; AltName: Full=Succinyl-CoA synthetase subunit alpha; Short=SCS-alpha; AltName: Full=Succinyl-coenzyme A synthetase alpha subunit 1; Flags: Precursor [Drosophila melanogaster]	CoA binding domain
MDBOrad1_00667
MDBOrad1_00668
MDBOrad1_00669	COG1024@1|root,KOG0016@2759|Eukaryota,39KX4@33154|Opisthokonta,3Q5AR@4751|Fungi,3V4TS@5204|Basidiomycota,226IU@155619|Agaricomycetes,3W5AT@5338|Agaricales	3Q5AR@4751|Fungi	RecName: Full=Enoyl-CoA hydratase AFT3-1; AltName: Full=AF-toxin biosynthesis protein 3-1 [Alternaria alternata]	Enoyl-CoA hydratase/isomerase
MDBOrad1_00670
MDBOrad1_00671
MDBOrad1_00672
MDBOrad1_00673
MDBOrad1_00674	COG3407@1|root,KOG2833@2759|Eukaryota,38DKK@33154|Opisthokonta,3NW3F@4751|Fungi,3UYB0@5204|Basidiomycota,224I0@155619|Agaricomycetes,3H0AP@355688|Agaricomycetes incertae sedis	3NW3F@4751|Fungi
MDBOrad1_00675
MDBOrad1_00676	COG2801@1|root,KOG0017@2759|Eukaryota,3AKRK@33154|Opisthokonta,3PE9Z@4751|Fungi,3VCKX@5204|Basidiomycota,22D2F@155619|Agaricomycetes,3H292@355688|Agaricomycetes incertae sedis	3VCKX@5204|Basidiomycota	RecName: Full=Uncharacterized mitochondrial protein AtMg00860; AltName: Full=ORF158 [Arabidopsis thaliana]	RNase H-like domain found in reverse transcriptase
MDBOrad1_00677
MDBOrad1_00678
MDBOrad1_00679
MDBOrad1_00680				gag-polypeptide of LTR copia-type
MDBOrad1_00681	COG0107@1|root,KOG0623@2759|Eukaryota,38J63@33154|Opisthokonta,3NUBP@4751|Fungi,3UZ6W@5204|Basidiomycota,225BX@155619|Agaricomycetes,3W48K@5338|Agaricales	3NUBP@4751|Fungi	RecName: Full=Imidazole glycerol phosphate synthase hisHF; Short=IGP synthase; Short=IGPS; Short=ImGP synthase; Includes: RecName: Full=Glutaminase; Includes: RecName: Full=Cyclase [Aspergillus nidulans FGSC A4]	Histidine biosynthesis protein
MDBOrad1_00682	2CY4R@1|root,2S21G@2759|Eukaryota,3AE7R@33154|Opisthokonta,3Q4WH@4751|Fungi,3V29T@5204|Basidiomycota,227D6@155619|Agaricomycetes,3W6J3@5338|Agaricales	3Q4WH@4751|Fungi	RecName: Full=Protein pal1; AltName: Full=Pears and lemons protein 1 [Schizosaccharomyces pombe 972h-]	Pal1 cell morphology protein
MDBOrad1_00683	COG3239@1|root,KOG4232@2759|Eukaryota,38B7V@33154|Opisthokonta,3NUM0@4751|Fungi,3UZPW@5204|Basidiomycota,225BK@155619|Agaricomycetes,3W4PW@5338|Agaricales	3NUM0@4751|Fungi	RecName: Full=Delta 8-(E)-sphingolipid desaturase [Kluyveromyces lactis NRRL Y-1140]	Fatty acid desaturase		5
MDBOrad1_00684	COG4352@1|root,KOG3295@2759|Eukaryota,39QV9@33154|Opisthokonta,3P222@4751|Fungi,3V0JJ@5204|Basidiomycota,226NU@155619|Agaricomycetes,3W3W2@5338|Agaricales	3P222@4751|Fungi	RecName: Full=60S ribosomal protein L13 [Schizosaccharomyces pombe 972h-]	Ribosomal protein L13e
MDBOrad1_00685	COG0620@1|root,KOG2263@2759|Eukaryota	KOG2263@2759|Eukaryota	RecName: Full=Uncharacterized protein YxjH [Bacillus subtilis subsp. subtilis str. 168]	Cobalamin-independent synthase, Catalytic domain
MDBOrad1_00686	2CGU8@1|root,2SKDC@2759|Eukaryota,3AHHZ@33154|Opisthokonta,3P5GG@4751|Fungi,3V5W0@5204|Basidiomycota,22920@155619|Agaricomycetes,3W6V5@5338|Agaricales	3P5GG@4751|Fungi			SP(Sec/SPI)	1
MDBOrad1_00687	2EHMR@1|root,2SN8X@2759|Eukaryota,3AJZE@33154|Opisthokonta,3PDDA@4751|Fungi,3V591@5204|Basidiomycota,229FU@155619|Agaricomycetes,3W6TX@5338|Agaricales	3PDDA@4751|Fungi
MDBOrad1_00688
MDBOrad1_00689	COG2319@1|root,KOG0263@2759|Eukaryota,38CV7@33154|Opisthokonta,3NWCH@4751|Fungi,3UY4H@5204|Basidiomycota,224GQ@155619|Agaricomycetes,3W3RP@5338|Agaricales	3NWCH@4751|Fungi	RecName: Full=Transcription initiation factor TFIID subunit 5; AltName: Full=Transcription initiation factor TFIID 72 kDa subunit; Short=TAFII-72 [Schizosaccharomyces pombe 972h-]	WD domain, G-beta repeat
MDBOrad1_00690	KOG3285@1|root,KOG3285@2759|Eukaryota,39UJR@33154|Opisthokonta,3NXDB@4751|Fungi,3V0YU@5204|Basidiomycota,224FT@155619|Agaricomycetes,3W68E@5338|Agaricales	3NXDB@4751|Fungi	RecName: Full=Mitotic spindle assembly checkpoint protein MAD2A; AltName: Full=Mitotic arrest deficient 2-like protein 1; Short=MAD2-like protein 1 [Dictyostelium discoideum]	HORMA domain
MDBOrad1_00691	KOG0039@1|root,KOG0039@2759|Eukaryota,397QT@33154|Opisthokonta,3NUTR@4751|Fungi,3UYW9@5204|Basidiomycota,228F6@155619|Agaricomycetes,3H383@355688|Agaricomycetes incertae sedis	3NUTR@4751|Fungi	RecName: Full=Superoxide-generating NADPH oxidase heavy chain subunit A; AltName: Full=NADPH oxidase A; AltName: Full=Superoxide-generating NADPH oxidase flavocytochrome A [Dictyostelium discoideum]	Ferric reductase NAD binding domain		5
MDBOrad1_00692	KOG0198@1|root,KOG0198@2759|Eukaryota,39J79@33154|Opisthokonta,3NVHJ@4751|Fungi,3UYYT@5204|Basidiomycota,224EF@155619|Agaricomycetes,3W4HA@5338|Agaricales	3NVHJ@4751|Fungi	RecName: Full=Serine/threonine-protein kinase BCK1/SLK1/SSP31 [Saccharomyces cerevisiae S288C]	Protein kinase domain
MDBOrad1_00693	COG5308@1|root,KOG1900@2759|Eukaryota,38TTX@33154|Opisthokonta,3NU2K@4751|Fungi,3UYDG@5204|Basidiomycota,228BE@155619|Agaricomycetes,3W3J8@5338|Agaricales	3NU2K@4751|Fungi	RecName: Full=Probable nucleoporin C890.06 [Schizosaccharomyces pombe 972h-]	Nup133 N terminal like		1
MDBOrad1_00694	2DR7U@1|root,2S6DH@2759|Eukaryota,39V7B@33154|Opisthokonta,3NYAY@4751|Fungi,3VCK1@5204|Basidiomycota,2250V@155619|Agaricomycetes,3W4J7@5338|Agaricales	3NYAY@4751|Fungi		RING-variant domain		3
MDBOrad1_00695	KOG0762@1|root,KOG0762@2759|Eukaryota,38GHZ@33154|Opisthokonta,3NU5T@4751|Fungi,3UZSE@5204|Basidiomycota,22652@155619|Agaricomycetes,3W3PK@5338|Agaricales	3NU5T@4751|Fungi	RecName: Full=Peroxisomal adenine nucleotide transporter 1 [Eremothecium gossypii ATCC 10895]	Mitochondrial carrier protein		2
MDBOrad1_00696	COG0847@1|root,KOG2249@2759|Eukaryota,3AETE@33154|Opisthokonta,3PAUQ@4751|Fungi,3V3VW@5204|Basidiomycota,228Z7@155619|Agaricomycetes,3W7N6@5338|Agaricales	3PAUQ@4751|Fungi	RecName: Full=RNA exonuclease 4; AltName: Full=Exonuclease XPMC2; AltName: Full=Prevents mitotic catastrophe 2 protein homolog [Mus musculus]
MDBOrad1_00697	2BZ4F@1|root,2S6VH@2759|Eukaryota,3A9Q9@33154|Opisthokonta,3P7V1@4751|Fungi,3V2AV@5204|Basidiomycota,225WA@155619|Agaricomycetes,3H1G0@355688|Agaricomycetes incertae sedis	3P7V1@4751|Fungi		Cut8, nuclear proteasome tether protein
MDBOrad1_00698	KOG1699@1|root,KOG1699@2759|Eukaryota,38EIR@33154|Opisthokonta,3NVU2@4751|Fungi,3UY7A@5204|Basidiomycota,226MY@155619|Agaricomycetes,3H3HW@355688|Agaricomycetes incertae sedis	3NVU2@4751|Fungi	RecName: Full=Probable O-acetyltransferase CAS1; AltName: Full=Capsule synthesis protein 1 [Cryptococcus neoformans var. neoformans JEC21]_x0001_P0CM57.1 RecName: Full=Probable O-acetyltransferase CAS1; AltName: Full=Capsule synthesis protein 1 [Cryptococcus neoformans var. neoformans B-3501A]	10 TM Acyl Transferase domain found in Cas1p		20
MDBOrad1_00699	2CMRY@1|root,2QRMC@2759|Eukaryota,39J7J@33154|Opisthokonta,3Q3J3@4751|Fungi,3UY5P@5204|Basidiomycota,22812@155619|Agaricomycetes,3W3T8@5338|Agaricales	3Q3J3@4751|Fungi	RecName: Full=Dilute domain-containing protein YPR089W [Saccharomyces cerevisiae S288C]	DIL domain
MDBOrad1_00700	2CYWF@1|root,2S6W0@2759|Eukaryota,3A9HP@33154|Opisthokonta,3P7DW@4751|Fungi,3V26E@5204|Basidiomycota,2292D@155619|Agaricomycetes,3W6TH@5338|Agaricales	3P7DW@4751|Fungi	RecName: Full=Ribosomal RNA-processing protein 15 [Saccharomyces cerevisiae S288C]	Rrp15p
MDBOrad1_00701	KOG3933@1|root,KOG3933@2759|Eukaryota,39XDB@33154|Opisthokonta,3P1QX@4751|Fungi,3V24I@5204|Basidiomycota,228XA@155619|Agaricomycetes,3W75Q@5338|Agaricales	3P1QX@4751|Fungi		Mitochondrial ribosomal subunit protein
MDBOrad1_00702	KOG1296@1|root,KOG1296@2759|Eukaryota,39TNN@33154|Opisthokonta,3P2GP@4751|Fungi,3V1TG@5204|Basidiomycota,2294A@155619|Agaricomycetes,3W761@5338|Agaricales	3P2GP@4751|Fungi	RecName: Full=UPF0587 protein v1g245604 [Nematostella vectensis]	CXXC motif containing zinc binding protein, eukaryotic
MDBOrad1_00703	28J6G@1|root,2QRIN@2759|Eukaryota,38I48@33154|Opisthokonta,3NYTZ@4751|Fungi,3UYHH@5204|Basidiomycota,22ASU@155619|Agaricomycetes,3W8UF@5338|Agaricales	3NYTZ@4751|Fungi	RecName: Full=IQ domain-containing protein IQM2; AltName: Full=IQ motif-containing protein 2 [Arabidopsis thaliana]
MDBOrad1_00704	KOG0198@1|root,KOG0198@2759|Eukaryota,39J79@33154|Opisthokonta,3NVHJ@4751|Fungi,3UYYT@5204|Basidiomycota,224EF@155619|Agaricomycetes,3W4HA@5338|Agaricales	3NVHJ@4751|Fungi	RecName: Full=MAP kinase kinase kinase mkh1 [Schizosaccharomyces pombe 972h-]	Protein kinase domain
MDBOrad1_00705	KOG2659@1|root,KOG2659@2759|Eukaryota,396D9@33154|Opisthokonta,3P02Y@4751|Fungi,3V0B5@5204|Basidiomycota,2278P@155619|Agaricomycetes,3W32F@5338|Agaricales	3P02Y@4751|Fungi	RecName: Full=Protein GID8 homolog [Arabidopsis thaliana]	CTLH/CRA C-terminal to LisH motif domain
MDBOrad1_00706	COG0388@1|root,KOG0805@2759|Eukaryota,39RP6@33154|Opisthokonta,3NWGQ@4751|Fungi,3V0KE@5204|Basidiomycota,226DW@155619|Agaricomycetes,3W6RD@5338|Agaricales	3NWGQ@4751|Fungi	RecName: Full=Arylacetonitrilase; AltName: Full=NitTv1 [Trametes versicolor FP-101664 SS1]	Carbon-nitrogen hydrolase
MDBOrad1_00707
MDBOrad1_00708	KOG2081@1|root,KOG2081@2759|Eukaryota,38GMX@33154|Opisthokonta,3NUD3@4751|Fungi,3UZYS@5204|Basidiomycota,228GH@155619|Agaricomycetes,3H27V@355688|Agaricomycetes incertae sedis	3NUD3@4751|Fungi	RecName: Full=Cell division control protein 3 [Candida albicans]	Septin
MDBOrad1_00709	2FIQQ@1|root,2TK5K@2759|Eukaryota,38JIV@33154|Opisthokonta,3PMF1@4751|Fungi,3VBF8@5204|Basidiomycota,22DPZ@155619|Agaricomycetes,3W9HN@5338|Agaricales	3PMF1@4751|Fungi		F-box-like
MDBOrad1_00710	COG0468@1|root,KOG1433@2759|Eukaryota,38CS4@33154|Opisthokonta,3NU4I@4751|Fungi,3UZ5Z@5204|Basidiomycota,227YA@155619|Agaricomycetes,3W5RP@5338|Agaricales	3NU4I@4751|Fungi	RecName: Full=DNA repair protein rhp51; AltName: Full=RAD51 homolog [Schizosaccharomyces pombe 972h-]	Rad51
MDBOrad1_00711	2D07W@1|root,2SD4X@2759|Eukaryota,3ADYE@33154|Opisthokonta,3P8YV@4751|Fungi,3V2ZN@5204|Basidiomycota,22AKD@155619|Agaricomycetes,3W7SE@5338|Agaricales	3P8YV@4751|Fungi
MDBOrad1_00712	2DZJ6@1|root,2S72R@2759|Eukaryota,3A934@33154|Opisthokonta,3P7N0@4751|Fungi,3V304@5204|Basidiomycota,2276J@155619|Agaricomycetes,3W7A6@5338|Agaricales	3P7N0@4751|Fungi	RecName: Full=Centromere protein mis12; AltName: Full=NMS complex subunit mis12 [Schizosaccharomyces pombe 972h-]	Mis12 protein
MDBOrad1_00713	2CN6G@1|root,2QU4U@2759|Eukaryota,39V42@33154|Opisthokonta,3NWCU@4751|Fungi,3VCBS@5204|Basidiomycota,225NB@155619|Agaricomycetes,3W8TT@5338|Agaricales	3NWCU@4751|Fungi	RecName: Full=Protoporphyrin uptake protein 1 [Saccharomyces cerevisiae S288C]	RTA1 like protein		7
MDBOrad1_00714	28J35@1|root,2QRF7@2759|Eukaryota,38EMQ@33154|Opisthokonta,3NY1T@4751|Fungi,3UYCD@5204|Basidiomycota,225ZS@155619|Agaricomycetes,3W5CA@5338|Agaricales	3NY1T@4751|Fungi	RecName: Full=Cell fusion protein cfr1; AltName: Full=CHS5-related protein 1 [Schizosaccharomyces pombe 972h-]	Fibronectin type III domain
MDBOrad1_00715	COG0798@1|root,2QPKH@2759|Eukaryota,38FTT@33154|Opisthokonta,3NUWB@4751|Fungi,3V02H@5204|Basidiomycota,2YDSF@29000|Pucciniomycotina	3NUWB@4751|Fungi	RecName: Full=Arsenite resistance protein ArsB [Bacillus subtilis subsp. subtilis str. 168]	Sodium Bile acid symporter family		4
MDBOrad1_00716	2DIF7@1|root,2S5YK@2759|Eukaryota,3A7YJ@33154|Opisthokonta,3P42Y@4751|Fungi,3QZ5S@4890|Ascomycota,21PSB@147550|Sordariomycetes	3P42Y@4751|Fungi
MDBOrad1_00717	2CMHQ@1|root,2QQD6@2759|Eukaryota,38D6B@33154|Opisthokonta,3NWA6@4751|Fungi,3QKXU@4890|Ascomycota,213WI@147550|Sordariomycetes,3U92E@5139|Sordariales,3UGRB@5148|Sordariaceae	3NWA6@4751|Fungi	RecName: Full=Arsenite methyltransferase; AltName: Full=As(III) methyltransferase [Methanosarcina acetivorans C2A]	Methyltransferase domain
MDBOrad1_00718	KOG0666@1|root,KOG0666@2759|Eukaryota,38BYY@33154|Opisthokonta,3NVFR@4751|Fungi,3UY8F@5204|Basidiomycota,224R4@155619|Agaricomycetes,3W3MH@5338|Agaricales	3NVFR@4751|Fungi	RecName: Full=Serine/threonine-protein kinase SSN3; AltName: Full=Cyclin-dependent kinase 8 [Cryptococcus neoformans var. neoformans JEC21]_x0001_P0CS77.1 RecName: Full=Serine/threonine-protein kinase SSN3; AltName: Full=Cyclin-dependent kinase 8 [Cryptococcus neoformans var. neoformans B-3501A]	Protein kinase domain
MDBOrad1_00719	2CSEF@1|root,2RBK5@2759|Eukaryota,3AY2B@33154|Opisthokonta,3PJ7J@4751|Fungi,3V8HJ@5204|Basidiomycota,22D5U@155619|Agaricomycetes,3W9CZ@5338|Agaricales	3PJ7J@4751|Fungi		F-box-like
MDBOrad1_00720	COG0111@1|root,KOG0068@2759|Eukaryota,38GJA@33154|Opisthokonta,3NU0Y@4751|Fungi,3UY0A@5204|Basidiomycota,225BU@155619|Agaricomycetes,3W5BU@5338|Agaricales	3NU0Y@4751|Fungi	RecName: Full=Putative D-3-phosphoglycerate dehydrogenase; Short=3-PGDH; AltName: Full=2-oxoglutarate reductase [Schizosaccharomyces pombe 972h-]	D-isomer specific 2-hydroxyacid dehydrogenase, NAD binding domain
MDBOrad1_00721	COG0088@1|root,KOG1624@2759|Eukaryota,38BG5@33154|Opisthokonta,3NXR2@4751|Fungi,3V1QP@5204|Basidiomycota,228AD@155619|Agaricomycetes,3H3E2@355688|Agaricomycetes incertae sedis	3NXR2@4751|Fungi	RecName: Full=50S ribosomal protein L4 [Pelotomaculum thermopropionicum SI]	Ribosomal protein L4/L1 family
MDBOrad1_00722	COG0088@1|root,KOG1753@2759|Eukaryota,3A1V3@33154|Opisthokonta,3P1RZ@4751|Fungi,3V0PG@5204|Basidiomycota,22927@155619|Agaricomycetes,3H4J4@355688|Agaricomycetes incertae sedis	3P1RZ@4751|Fungi	RecName: Full=40S ribosomal protein S16-A [Schizosaccharomyces pombe 972h-]_x0001_P0CT65.1 RecName: Full=40S ribosomal protein S16-B [Schizosaccharomyces pombe 972h-]	Ribosomal protein S9/S16
MDBOrad1_00723	2EKBU@1|root,2SQ9M@2759|Eukaryota,3AMUZ@33154|Opisthokonta,3PE00@4751|Fungi,3V5NE@5204|Basidiomycota,229NW@155619|Agaricomycetes	3PE00@4751|Fungi		BRCT domain, a BRCA1 C-terminus domain
MDBOrad1_00724	2C8WE@1|root,2S81D@2759|Eukaryota,3A2AJ@33154|Opisthokonta,3P2XV@4751|Fungi,3V1XW@5204|Basidiomycota,229X8@155619|Agaricomycetes,3W82E@5338|Agaricales	3P2XV@4751|Fungi
MDBOrad1_00725	KOG1034@1|root,KOG1034@2759|Eukaryota,38HUK@33154|Opisthokonta,3NXXM@4751|Fungi,3V30W@5204|Basidiomycota,2299V@155619|Agaricomycetes,3W6HM@5338|Agaricales	3NXXM@4751|Fungi		WD domain, G-beta repeat
MDBOrad1_00726	COG1061@1|root,2QT4U@2759|Eukaryota,38GE0@33154|Opisthokonta,3NWXY@4751|Fungi,3UZD8@5204|Basidiomycota,2265J@155619|Agaricomycetes,3W49G@5338|Agaricales	3NWXY@4751|Fungi	RecName: Full=Putative mitochondrial ATP-dependent helicase irc3 [Schizosaccharomyces pombe 972h-]	Type III restriction enzyme, res subunit
MDBOrad1_00727	KOG0749@1|root,KOG0749@2759|Eukaryota,38B82@33154|Opisthokonta,3NWSK@4751|Fungi,3V06A@5204|Basidiomycota,2271S@155619|Agaricomycetes,3W5F8@5338|Agaricales	3NWSK@4751|Fungi	RecName: Full=ADP,ATP carrier protein; AltName: Full=ADP/ATP translocase; AltName: Full=Adenine nucleotide translocator; Short=ANT [Neurospora crassa OR74A]	Mitochondrial carrier protein		3
MDBOrad1_00728	KOG2169@1|root,KOG2169@2759|Eukaryota,38DW4@33154|Opisthokonta,3NYWT@4751|Fungi,3V0EM@5204|Basidiomycota,225JZ@155619|Agaricomycetes,3W3CW@5338|Agaricales	3NYWT@4751|Fungi	RecName: Full=E4 SUMO-protein ligase PIAL2; AltName: Full=Protein INHIBITOR OF ACTIVATED STAT-LIKE 2 [Arabidopsis thaliana]	PINIT domain
MDBOrad1_00729	KOG2265@1|root,KOG2265@2759|Eukaryota,38D01@33154|Opisthokonta,3P1SW@4751|Fungi,3V0MJ@5204|Basidiomycota,2268V@155619|Agaricomycetes,3H3YB@355688|Agaricomycetes incertae sedis	3P1SW@4751|Fungi	RecName: Full=Nuclear movement protein nudC; AltName: Full=Nuclear distribution protein C [Aspergillus nidulans FGSC A4]	CS domain
MDBOrad1_00730	COG5638@1|root,KOG2318@2759|Eukaryota,38GAF@33154|Opisthokonta,3NU82@4751|Fungi,3UY0B@5204|Basidiomycota,226R3@155619|Agaricomycetes,3W5FR@5338|Agaricales	3NU82@4751|Fungi	RecName: Full=Pre-rRNA-processing protein esf1 [Schizosaccharomyces pombe 972h-]	NUC153 domain
MDBOrad1_00731				Domain of unknown function (DUF6721)	SP(Sec/SPI)		yes
MDBOrad1_00732	COG2313@1|root,KOG3009@2759|Eukaryota,38BEH@33154|Opisthokonta,3NUN7@4751|Fungi,3V04B@5204|Basidiomycota,224CY@155619|Agaricomycetes,3W696@5338|Agaricales	3NUN7@4751|Fungi	RecName: Full=Pseudouridine-metabolizing bifunctional protein C1861.05; Includes: RecName: Full=Pseudouridine-5'-phosphate glycosidase; Short=PsiMP glycosidase; Includes: RecName: Full=Pseudouridine kinase [Schizosaccharomyces pombe 972h-]	Indigoidine synthase A like protein
MDBOrad1_00733	COG0314@1|root,KOG3307@2759|Eukaryota,3A4C5@33154|Opisthokonta,3P48G@4751|Fungi,3V2JC@5204|Basidiomycota,229PH@155619|Agaricomycetes,3H546@355688|Agaricomycetes incertae sedis	3P48G@4751|Fungi	RecName: Full=Molybdopterin synthase catalytic subunit; AltName: Full=Common component for nitrate reductase and xanthine dehydrogenase protein H; AltName: Full=Molybdenum cofactor synthesis protein 2 large subunit; AltName: Full=Molybdenum cofactor synthesis protein 2B; Short=MOCS2B [Aspergillus niger CBS 513.88]	MoaE protein
MDBOrad1_00734	28JES@1|root,2QRTT@2759|Eukaryota,39PVZ@33154|Opisthokonta,3NZIA@4751|Fungi,3UYX7@5204|Basidiomycota,2256C@155619|Agaricomycetes,3W6MJ@5338|Agaricales	3NZIA@4751|Fungi		ICE2		8
MDBOrad1_00735	COG0449@1|root,KOG1268@2759|Eukaryota,38BHP@33154|Opisthokonta,3NWKE@4751|Fungi,3V00I@5204|Basidiomycota,22526@155619|Agaricomycetes,3W4WP@5338|Agaricales	3NWKE@4751|Fungi	RecName: Full=Probable glutamine amidotransferase DUG3; AltName: Full=Deficient in utilization of glutathione protein 3; AltName: Full=GSH degradosomal complex subunit DUG3 [Saccharomyces cerevisiae S288C]	Glutamine amidotransferases class-II
MDBOrad1_00736	COG1109@1|root,KOG2537@2759|Eukaryota,38CHB@33154|Opisthokonta,3NV1D@4751|Fungi,3UYQI@5204|Basidiomycota,227DY@155619|Agaricomycetes,3W431@5338|Agaricales	3NV1D@4751|Fungi	RecName: Full=Phosphoacetylglucosamine mutase; Short=PAGM; AltName: Full=Acetylglucosamine phosphomutase; AltName: Full=N-acetylglucosamine-phosphate mutase; AltName: Full=Phosphoglucomutase-3; Short=PGM 3 [Mus musculus]	Phosphoglucomutase/phosphomannomutase, alpha/beta/alpha domain I
MDBOrad1_00737	KOG1586@1|root,KOG1586@2759|Eukaryota,38GSG@33154|Opisthokonta,3NWP2@4751|Fungi,3UZB3@5204|Basidiomycota,22872@155619|Agaricomycetes,3W6F1@5338|Agaricales	3NWP2@4751|Fungi	RecName: Full=Vesicular-fusion protein SEC17 [Coprinopsis cinerea okayama7#130]	Soluble NSF attachment protein, SNAP
MDBOrad1_00738	2CSNM@1|root,2RCI6@2759|Eukaryota,3AYPI@33154|Opisthokonta,3PJTJ@4751|Fungi,3V47R@5204|Basidiomycota,229I7@155619|Agaricomycetes	3PJTJ@4751|Fungi
MDBOrad1_00739	2D38K@1|root,2SQN6@2759|Eukaryota,39J36@33154|Opisthokonta,3Q3FK@4751|Fungi,3VC91@5204|Basidiomycota,22FB2@155619|Agaricomycetes	3Q3FK@4751|Fungi				1
MDBOrad1_00740	COG2124@1|root,KOG0156@2759|Eukaryota,3AHIB@33154|Opisthokonta,3PBCR@4751|Fungi,3V4S1@5204|Basidiomycota,22BEB@155619|Agaricomycetes,3H6XE@355688|Agaricomycetes incertae sedis	3PBCR@4751|Fungi	RecName: Full=Cytochrome P450 monooxygenase ARMGADRAFT_974139; AltName: Full=Melleolide biosynthesis cluster protein ARMGADRAFT_974139 [Armillaria gallica]	Cytochrome P450	SP(Sec/SPI)		yes
MDBOrad1_00741	28NVX@1|root,2QVFY@2759|Eukaryota,39VI7@33154|Opisthokonta,3NZKU@4751|Fungi,3UYDP@5204|Basidiomycota,227ZA@155619|Agaricomycetes,3W6K0@5338|Agaricales	3NZKU@4751|Fungi				8
MDBOrad1_00742	COG0262@1|root,KOG1324@2759|Eukaryota,3A5M4@33154|Opisthokonta,3P56D@4751|Fungi,3V1E7@5204|Basidiomycota,228X8@155619|Agaricomycetes,3H4SI@355688|Agaricomycetes incertae sedis	3P56D@4751|Fungi	RecName: Full=Dihydrofolate reductase [Cryptococcus neoformans var. neoformans JEC21]	Dihydrofolate reductase
MDBOrad1_00743	KOG2287@1|root,KOG2287@2759|Eukaryota,3AG4W@33154|Opisthokonta,3NY5H@4751|Fungi,3V49V@5204|Basidiomycota,22621@155619|Agaricomycetes,3W4MP@5338|Agaricales	3NY5H@4751|Fungi		Glutathione S-transferase, N-terminal domain		1
MDBOrad1_00744	COG5091@1|root,KOG1309@2759|Eukaryota,38TPS@33154|Opisthokonta,3P0UK@4751|Fungi,3V157@5204|Basidiomycota,224X4@155619|Agaricomycetes,3W6TY@5338|Agaricales	3P0UK@4751|Fungi	RecName: Full=Protein SGT1 homolog B; Short=AtSGT1b; AltName: Full=Protein ENHANCED DOWNY MILDEW 1; AltName: Full=Protein ENHANCER OF TIR1-1 AUXIN RESISTANCE 3; AltName: Full=Suppressor of G2 allele of SKP1 homolog B [Arabidopsis thaliana]	SGS domain
MDBOrad1_00745	2DZW3@1|root,2S7CJ@2759|Eukaryota,3A88A@33154|Opisthokonta,3P7CD@4751|Fungi,3V26A@5204|Basidiomycota,229PQ@155619|Agaricomycetes	3P7CD@4751|Fungi				1
MDBOrad1_00746	2D1AZ@1|root,2S4VJ@2759|Eukaryota,3A0PD@33154|Opisthokonta,3P1U1@4751|Fungi,3V1JZ@5204|Basidiomycota,2277I@155619|Agaricomycetes,3H2YS@355688|Agaricomycetes incertae sedis	3P1U1@4751|Fungi				1
MDBOrad1_00747	28KWI@1|root,2QTD4@2759|Eukaryota,39R2C@33154|Opisthokonta,3NXNW@4751|Fungi,3V3MM@5204|Basidiomycota,226T6@155619|Agaricomycetes,3W7R0@5338|Agaricales	3NXNW@4751|Fungi	RecName: Full=Ureidoacrylate amidohydrolase RutB [Caulobacter segnis ATCC 21756]	Isochorismatase family
MDBOrad1_00748	COG1100@1|root,KOG0086@2759|Eukaryota,397IG@33154|Opisthokonta,3NZ8R@4751|Fungi,3V067@5204|Basidiomycota,227F3@155619|Agaricomycetes,3H3II@355688|Agaricomycetes incertae sedis	3NZ8R@4751|Fungi	RecName: Full=Ras-related protein Rab-4B [Danio rerio]	Ras family		1
MDBOrad1_00749	COG3616@1|root,2QRZ0@2759|Eukaryota,38BQA@33154|Opisthokonta,3NV75@4751|Fungi,3V0HT@5204|Basidiomycota,2271Q@155619|Agaricomycetes,3W4WZ@5338|Agaricales	3NV75@4751|Fungi	RecName: Full=D-serine dehydratase; AltName: Full=D-serine deaminase; Short=DSD [Schizosaccharomyces pombe 972h-]	Putative serine dehydratase domain
MDBOrad1_00750	COG0251@1|root,KOG2317@2759|Eukaryota,3A3NI@33154|Opisthokonta,3P43C@4751|Fungi,3V5FZ@5204|Basidiomycota,22F1C@155619|Agaricomycetes	3P43C@4751|Fungi	RecName: Full=Protein HMF1; AltName: Full=High dosage growth inhibitor; AltName: Full=Homologous mitochondrial matrix factor 1 [Saccharomyces cerevisiae S288C]	Endoribonuclease L-PSP
MDBOrad1_00751	COG0477@1|root,KOG2533@2759|Eukaryota,38CJ6@33154|Opisthokonta,3NV36@4751|Fungi,3V3YM@5204|Basidiomycota,22643@155619|Agaricomycetes,3W59T@5338|Agaricales	3NV36@4751|Fungi	RecName: Full=Uncharacterized transporter C1039.04 [Schizosaccharomyces pombe 972h-]	Major Facilitator Superfamily		10
MDBOrad1_00752	COG0186@1|root,KOG1728@2759|Eukaryota,39ZXQ@33154|Opisthokonta,3NVGD@4751|Fungi,3V0AZ@5204|Basidiomycota,226SY@155619|Agaricomycetes,3W4BX@5338|Agaricales	3NVGD@4751|Fungi	RecName: Full=40S ribosomal protein S11-A [Schizosaccharomyces pombe 972h-]_x0001_P0CT74.1 RecName: Full=40S ribosomal protein S11-B [Schizosaccharomyces pombe 972h-]	Ribosomal_S17 N-terminal
MDBOrad1_00753	COG0639@1|root,KOG0374@2759|Eukaryota,38BGF@33154|Opisthokonta,3NUEW@4751|Fungi,3UZJJ@5204|Basidiomycota,224ER@155619|Agaricomycetes	3NUEW@4751|Fungi	RecName: Full=Serine/threonine-protein phosphatase PP-Z [Schizosaccharomyces pombe 972h-]	Calcineurin-like phosphoesterase
MDBOrad1_00754	2CXT0@1|root,2RZIB@2759|Eukaryota,39K7R@33154|Opisthokonta,3Q4KJ@4751|Fungi,3V0ZS@5204|Basidiomycota,226Z2@155619|Agaricomycetes,3W4ID@5338|Agaricales	3Q4KJ@4751|Fungi				10
MDBOrad1_00755	KOG3190@1|root,KOG3190@2759|Eukaryota,39Y0E@33154|Opisthokonta,3NV5Q@4751|Fungi,3V1KJ@5204|Basidiomycota,228CG@155619|Agaricomycetes,3H0FK@355688|Agaricomycetes incertae sedis	3NV5Q@4751|Fungi	RecName: Full=rRNA biogenesis protein RRP36; AltName: Full=Ribosomal RNA-processing protein 36 [Laccaria bicolor S238N-H82]	rRNA biogenesis protein RRP36
MDBOrad1_00756	29QEY@1|root,2RX8H@2759|Eukaryota,3A0M8@33154|Opisthokonta,3P1Q2@4751|Fungi,3V0M9@5204|Basidiomycota,2252C@155619|Agaricomycetes,3W35M@5338|Agaricales	3P1Q2@4751|Fungi	RecName: Full=Manganese resistance protein MNR2 [Saccharomyces cerevisiae S288C]	CorA-like Mg2+ transporter protein		2
MDBOrad1_00757	2CNXG@1|root,2QYJU@2759|Eukaryota,3AY7A@33154|Opisthokonta,3PJCF@4751|Fungi,3V8P7@5204|Basidiomycota,22DC1@155619|Agaricomycetes,3W99V@5338|Agaricales	3PJCF@4751|Fungi
MDBOrad1_00758	2E064@1|root,2S7MN@2759|Eukaryota,3A9TB@33154|Opisthokonta,3P7CX@4751|Fungi,3V2HG@5204|Basidiomycota,2293U@155619|Agaricomycetes,3W7AX@5338|Agaricales	3P7CX@4751|Fungi
MDBOrad1_00759	2EE87@1|root,2SJPK@2759|Eukaryota,3AET5@33154|Opisthokonta,3PCSP@4751|Fungi,3V4B3@5204|Basidiomycota,2299R@155619|Agaricomycetes,3W6ZW@5338|Agaricales	3PCSP@4751|Fungi
MDBOrad1_00760	KOG4546@1|root,KOG4546@2759|Eukaryota,38GNP@33154|Opisthokonta,3NXIQ@4751|Fungi,3UZTW@5204|Basidiomycota,2252B@155619|Agaricomycetes,3H3US@355688|Agaricomycetes incertae sedis	3NXIQ@4751|Fungi	RecName: Full=Peroxisomal membrane protein PEX16; AltName: Full=Peroxin-16 [Yarrowia lipolytica CLIB122]	Peroxisomal membrane protein (Pex16)
MDBOrad1_00761	2E1Q6@1|root,2S90D@2759|Eukaryota,3AAK0@33154|Opisthokonta,3P7RE@4751|Fungi,3V2P2@5204|Basidiomycota,229SC@155619|Agaricomycetes,3W7YU@5338|Agaricales	3P7RE@4751|Fungi
MDBOrad1_00762	COG1028@1|root,KOG0725@2759|Eukaryota,39JG8@33154|Opisthokonta,3Q3TC@4751|Fungi,3VCDY@5204|Basidiomycota,228Q6@155619|Agaricomycetes,3H94X@355688|Agaricomycetes incertae sedis	3Q3TC@4751|Fungi	RecName: Full=L-rhamnose-1-dehydrogenase [Scheffersomyces stipitis CBS 6054]	Enoyl-(Acyl carrier protein) reductase
MDBOrad1_00763	KOG0147@1|root,KOG0147@2759|Eukaryota,39R6Y@33154|Opisthokonta,3NV0X@4751|Fungi,3UYSN@5204|Basidiomycota,22685@155619|Agaricomycetes,3W5EN@5338|Agaricales	3NV0X@4751|Fungi	RecName: Full=RNA-binding protein rsd1 [Schizosaccharomyces pombe 972h-]	RNA recognition motif. (a.k.a. RRM, RBD, or RNP domain)
MDBOrad1_00764	COG1793@1|root,KOG0967@2759|Eukaryota,38FCP@33154|Opisthokonta,3NW9U@4751|Fungi,3UZV7@5204|Basidiomycota,226MI@155619|Agaricomycetes,3H1GK@355688|Agaricomycetes incertae sedis	3NW9U@4751|Fungi	RecName: Full=DNA ligase 1; AltName: Full=DNA ligase I; AltName: Full=Polydeoxyribonucleotide synthase [ATP] 1 [Schizosaccharomyces pombe 972h-]	ATP dependent DNA ligase domain
MDBOrad1_00765	KOG1590@1|root,KOG1590@2759|Eukaryota,3A5JS@33154|Opisthokonta,3P5SQ@4751|Fungi,3V1C3@5204|Basidiomycota,229E3@155619|Agaricomycetes,3W79N@5338|Agaricales	3P5SQ@4751|Fungi	RecName: Full=Mitochondrial pyruvate carrier 1; Short=MPC1 [Drosophila melanogaster]	Mitochondrial pyruvate carriers
MDBOrad1_00766	2EK0H@1|root,2SQ18@2759|Eukaryota,3AM31@33154|Opisthokonta,3PDVE@4751|Fungi,3V5FJ@5204|Basidiomycota,22AP3@155619|Agaricomycetes	3PDVE@4751|Fungi
MDBOrad1_00767	COG1443@1|root,KOG0142@2759|Eukaryota,38DS6@33154|Opisthokonta,3NU8E@4751|Fungi,3UZYA@5204|Basidiomycota,2274J@155619|Agaricomycetes,3W4S9@5338|Agaricales	3NU8E@4751|Fungi	RecName: Full=Isopentenyl-diphosphate delta-isomerase; AltName: Full=Isopentenyl pyrophosphate isomerase; Short=IPP isomerase [Phaffia rhodozyma]	NUDIX domain
MDBOrad1_00768	KOG1213@1|root,KOG1213@2759|Eukaryota,39V5X@33154|Opisthokonta,3NY2J@4751|Fungi,3V1G3@5204|Basidiomycota,224WJ@155619|Agaricomycetes,3W6M4@5338|Agaricales	3NY2J@4751|Fungi	RecName: Full=Meiotic recombination protein rec8; AltName: Full=Cohesin rec8 [Schizosaccharomyces pombe 972h-]	N terminus of Rad21 / Rec8 like protein
MDBOrad1_00769	COG1131@1|root,KOG0065@2759|Eukaryota,38F6P@33154|Opisthokonta,3NTZE@4751|Fungi,3UZQ1@5204|Basidiomycota,225JX@155619|Agaricomycetes,3W5SZ@5338|Agaricales	3NTZE@4751|Fungi	RecName: Full=Brefeldin A resistance protein [Schizosaccharomyces pombe 972h-]	ABC-2 type transporter		12
MDBOrad1_00770	2BZ0M@1|root,2QS59@2759|Eukaryota,3A3VH@33154|Opisthokonta,3P4GP@4751|Fungi,3V1IX@5204|Basidiomycota,226D3@155619|Agaricomycetes,3W73P@5338|Agaricales	3P4GP@4751|Fungi		Protein of unknown function (DUF3292)		3
MDBOrad1_00771	2EF31@1|root,2SKC2@2759|Eukaryota,3AGTW@33154|Opisthokonta,3PCW7@4751|Fungi,3V3AT@5204|Basidiomycota,227PI@155619|Agaricomycetes,3W3VQ@5338|Agaricales	3PCW7@4751|Fungi
MDBOrad1_00772	2EKT0@1|root,2R14W@2759|Eukaryota,3AYR5@33154|Opisthokonta,3PJV1@4751|Fungi,3V99R@5204|Basidiomycota,22DQZ@155619|Agaricomycetes,3W87I@5338|Agaricales	3PJV1@4751|Fungi
MDBOrad1_00773	KOG3456@1|root,KOG3456@2759|Eukaryota,3A6F7@33154|Opisthokonta,3P5RA@4751|Fungi,3V1SN@5204|Basidiomycota,229S9@155619|Agaricomycetes,3W7HJ@5338|Agaricales	3P5RA@4751|Fungi	RecName: Full=Lactobacillus shifted protein [Aspergillus nidulans FGSC A4]	Zinc-finger domain
MDBOrad1_00774	KOG0661@1|root,KOG0661@2759|Eukaryota,38F74@33154|Opisthokonta,3NUYP@4751|Fungi,3UXW0@5204|Basidiomycota,22505@155619|Agaricomycetes,3W5ND@5338|Agaricales	3NUYP@4751|Fungi	RecName: Full=Serine/threonine-protein kinase MAK; AltName: Full=Male germ cell-associated kinase; AltName: Full=Protein kinase RCK [Mus musculus]	Protein kinase domain
MDBOrad1_00775	COG0494@1|root,KOG2937@2759|Eukaryota,38CUB@33154|Opisthokonta,3NYHF@4751|Fungi,3V0BB@5204|Basidiomycota,227VW@155619|Agaricomycetes,3W54K@5338|Agaricales	3NYHF@4751|Fungi	RecName: Full=mRNA decapping complex subunit 2 [Schizosaccharomyces pombe 972h-]	Dcp2, box A domain
MDBOrad1_00776	COG0542@1|root,KOG1051@2759|Eukaryota,38CTT@33154|Opisthokonta,3NXN8@4751|Fungi,3UZA6@5204|Basidiomycota,224RT@155619|Agaricomycetes,3W5ST@5338|Agaricales	3NXN8@4751|Fungi	RecName: Full=Heat shock protein 104; AltName: Full=Protein aggregation-remodeling factor hsp104 [Schizosaccharomyces pombe 972h-]	Clp amino terminal domain, pathogenicity island component
MDBOrad1_00777
MDBOrad1_00778						1
MDBOrad1_00779	29NKX@1|root,2RVXU@2759|Eukaryota,38IAP@33154|Opisthokonta,3PK7X@4751|Fungi,3V9TE@5204|Basidiomycota,22CRJ@155619|Agaricomycetes,3H7X5@355688|Agaricomycetes incertae sedis	3PK7X@4751|Fungi
MDBOrad1_00780	COG0542@1|root,KOG1051@2759|Eukaryota,38CTT@33154|Opisthokonta,3NXN8@4751|Fungi,3UZA6@5204|Basidiomycota,224RT@155619|Agaricomycetes,3W5ST@5338|Agaricales	3NXN8@4751|Fungi	RecName: Full=Heat shock protein 104; AltName: Full=Protein aggregation-remodeling factor hsp104 [Schizosaccharomyces pombe 972h-]	Zinc-finger double domain		6
MDBOrad1_00781	2CMIZ@1|root,2QQG9@2759|Eukaryota,39J9E@33154|Opisthokonta,3Q3KD@4751|Fungi,3V03X@5204|Basidiomycota,22FFS@155619|Agaricomycetes,3W5DA@5338|Agaricales	3Q3KD@4751|Fungi		Magnesium transporter NIPA		9
MDBOrad1_00782	28PE2@1|root,2QW1Q@2759|Eukaryota,38UQ6@33154|Opisthokonta,3NY0Y@4751|Fungi,3UYZQ@5204|Basidiomycota,2265Y@155619|Agaricomycetes,3W44B@5338|Agaricales	3NY0Y@4751|Fungi		DENN (AEX-3) domain
MDBOrad1_00783	COG5043@1|root,KOG1809@2759|Eukaryota,38B64@33154|Opisthokonta,3NVAS@4751|Fungi,3UZBA@5204|Basidiomycota,224KA@155619|Agaricomycetes,3W5Q9@5338|Agaricales	3NVAS@4751|Fungi	RecName: Full=Vacuolar protein sorting-associated protein 13; AltName: Full=Suppression of the onset of impotence protein 1; AltName: Full=Vacuolar protein-targeting protein 2 [Saccharomyces cerevisiae S288C]	Repeating coiled region of VPS13
MDBOrad1_00784	2EX2F@1|root,2SYTB@2759|Eukaryota,3AQHQ@33154|Opisthokonta,3PG2Z@4751|Fungi,3V6AD@5204|Basidiomycota,22AE1@155619|Agaricomycetes,3H5TK@355688|Agaricomycetes incertae sedis	3PG2Z@4751|Fungi
MDBOrad1_00785	KOG3071@1|root,KOG3071@2759|Eukaryota,38BJ3@33154|Opisthokonta,3NU6C@4751|Fungi,3V030@5204|Basidiomycota,228F3@155619|Agaricomycetes,3W6NP@5338|Agaricales	3NU6C@4751|Fungi	RecName: Full=Putative elongation of fatty acids protein 1; AltName: Full=3-keto acyl-CoA synthase SPAC1B2.03c; AltName: Full=Very-long-chain 3-oxoacyl-CoA synthase 1 [Schizosaccharomyces pombe 972h-]	GNS1/SUR4 family		5
MDBOrad1_00786	KOG3508@1|root,KOG3508@2759|Eukaryota,38FII@33154|Opisthokonta,3NUJW@4751|Fungi,3V09N@5204|Basidiomycota,22823@155619|Agaricomycetes,3W4FN@5338|Agaricales	3NUJW@4751|Fungi	RecName: Full=Disabled homolog 2-interacting protein; Short=DAB2 interaction protein; Short=DAB2-interacting protein; AltName: Full=ASK-interacting protein 1; Short=AIP-1; AltName: Full=DOC-2/DAB-2 interactive protein [Homo sapiens]	GTPase-activator protein for Ras-like GTPase
MDBOrad1_00787	COG4354@1|root,KOG1077@2759|Eukaryota,38EKD@33154|Opisthokonta,3NUVX@4751|Fungi,3UYGN@5204|Basidiomycota,225WV@155619|Agaricomycetes,3W3JT@5338|Agaricales	3NUVX@4751|Fungi	RecName: Full=AP-2 complex subunit alpha-2; AltName: Full=100 kDa coated vesicle protein C; AltName: Full=Adaptor protein complex AP-2 subunit alpha-2; AltName: Full=Adaptor-related protein complex 2 subunit alpha-2; AltName: Full=Alpha-adaptin C; AltName: Full=Alpha2-adaptin; AltName: Full=Clathrin assembly protein complex 2 alpha-C large chain; AltName: Full=Plasma membrane adaptor HA2/AP2 adap…	Adaptin N terminal region
MDBOrad1_00788	KOG3081@1|root,KOG3081@2759|Eukaryota,38HBK@33154|Opisthokonta,3NV0Y@4751|Fungi,3V1KM@5204|Basidiomycota,22806@155619|Agaricomycetes,3W5Z0@5338|Agaricales	3NV0Y@4751|Fungi		Coatomer epsilon subunit
MDBOrad1_00789	COG1643@1|root,KOG0920@2759|Eukaryota,38B5Q@33154|Opisthokonta,3NWAW@4751|Fungi,3UYA0@5204|Basidiomycota,22864@155619|Agaricomycetes,3H2S1@355688|Agaricomycetes incertae sedis	3NWAW@4751|Fungi	RecName: Full=ATP-dependent DNA/RNA helicase DHX36; AltName: Full=DEAD/H box polypeptide 36; AltName: Full=DEAH box protein 36; AltName: Full=MLE-like protein 1; AltName: Full=RNA helicase associated with AU-rich element ARE [Mus musculus]	Helicase associated domain (HA2)
MDBOrad1_00790	KOG0280@1|root,KOG0280@2759|Eukaryota,38UJD@33154|Opisthokonta,3P1YJ@4751|Fungi,3V10I@5204|Basidiomycota,226J1@155619|Agaricomycetes,3H2X4@355688|Agaricomycetes incertae sedis	3P1YJ@4751|Fungi	RecName: Full=Diphthine methyltransferase homolog; AltName: Full=Diphthamide biosynthesis protein 7 homolog; AltName: Full=WD repeat-containing protein 85 homolog [Dictyostelium discoideum]
MDBOrad1_00791	COG1076@1|root,KOG3192@2759|Eukaryota,3A0FM@33154|Opisthokonta,3P1Z9@4751|Fungi,3V1RG@5204|Basidiomycota,22A5P@155619|Agaricomycetes,3W729@5338|Agaricales	3P1Z9@4751|Fungi	RecName: Full=Co-chaperone protein HscB; AltName: Full=Hsc20 [Proteus mirabilis HI4320]	HSCB C-terminal oligomerisation domain
MDBOrad1_00792	2E4GX@1|root,2SBDA@2759|Eukaryota,3A9BP@33154|Opisthokonta,3P7WC@4751|Fungi,3V2G1@5204|Basidiomycota,22955@155619|Agaricomycetes,3W6YA@5338|Agaricales	3P7WC@4751|Fungi	RecName: Full=Meiotically up-regulated gene 65 protein [Schizosaccharomyces pombe 972h-]	Integral peroxisomal membrane peroxin
MDBOrad1_00793	COG0676@1|root,KOG1594@2759|Eukaryota,39SA3@33154|Opisthokonta,3NX4X@4751|Fungi,3V1D1@5204|Basidiomycota,224UK@155619|Agaricomycetes	3NX4X@4751|Fungi	RecName: Full=Glucose-6-phosphate 1-epimerase; AltName: Full=D-hexose-6-phosphate mutarotase [Saccharomyces cerevisiae S288C]	Aldose 1-epimerase
MDBOrad1_00794
MDBOrad1_00795	KOG0211@1|root,KOG0211@2759|Eukaryota,38DRM@33154|Opisthokonta,3NU14@4751|Fungi,3UYJV@5204|Basidiomycota,224DI@155619|Agaricomycetes,3W579@5338|Agaricales	3NU14@4751|Fungi	RecName: Full=Protein phosphatase PP2A regulatory subunit A; AltName: Full=Protein phosphatase 2A 65 kDa regulatory subunit; Short=PR65 [Schizosaccharomyces pombe 972h-]	HEAT repeat
MDBOrad1_00796	2E2W8@1|root,2SA2G@2759|Eukaryota,3A9FS@33154|Opisthokonta,3P7Z9@4751|Fungi,3V2RF@5204|Basidiomycota,229WH@155619|Agaricomycetes,3H5F9@355688|Agaricomycetes incertae sedis	3P7Z9@4751|Fungi	RecName: Full=Protein priA; Flags: Precursor [Lentinula edodes]		SP(Sec/SPI)		yes
MDBOrad1_00797	2EJWM@1|root,2SPYR@2759|Eukaryota,3AM0S@33154|Opisthokonta,3PDYG@4751|Fungi,3V5FB@5204|Basidiomycota,22AB3@155619|Agaricomycetes,3H631@355688|Agaricomycetes incertae sedis	3PDYG@4751|Fungi			SP(Sec/SPI)		yes
MDBOrad1_00798	2CY0F@1|root,2S13M@2759|Eukaryota,3A3EM@33154|Opisthokonta,3P3UV@4751|Fungi,3V2AQ@5204|Basidiomycota,229C5@155619|Agaricomycetes,3W929@5338|Agaricales	3P3UV@4751|Fungi				3
MDBOrad1_00799	COG2004@1|root,KOG3424@2759|Eukaryota,3A1MU@33154|Opisthokonta,3P333@4751|Fungi,3V11W@5204|Basidiomycota,229H2@155619|Agaricomycetes,3W91K@5338|Agaricales	3P333@4751|Fungi	RecName: Full=40S ribosomal protein S24 [Chaetomium thermophilum var. thermophilum DSM 1495]	Ribosomal protein S24e
MDBOrad1_00800	COG5277@1|root,KOG0676@2759|Eukaryota,38CY2@33154|Opisthokonta,3NU18@4751|Fungi,3UZ93@5204|Basidiomycota,228H2@155619|Agaricomycetes,3H2TF@355688|Agaricomycetes incertae sedis	3NU18@4751|Fungi	RecName: Full=Actin-2; AltName: Full=Actin II; AltName: Full=Centractin-like protein [Pneumocystis carinii]	Actin
MDBOrad1_00801	KOG4157@1|root,KOG4157@2759|Eukaryota,39S49@33154|Opisthokonta,3NVDV@4751|Fungi,3V05K@5204|Basidiomycota,22EEW@155619|Agaricomycetes,3W9W5@5338|Agaricales	3NVDV@4751|Fungi	RecName: Full=Acetylxylan esterase; Flags: Precursor [Trichoderma reesei]	Domain of unknown function (DUF1996)	SP(Sec/SPI)		yes
MDBOrad1_00802	COG0513@1|root,KOG0338@2759|Eukaryota,38JKP@33154|Opisthokonta,3NXAQ@4751|Fungi,3UYFW@5204|Basidiomycota,2253S@155619|Agaricomycetes,3H26I@355688|Agaricomycetes incertae sedis	3NXAQ@4751|Fungi	RecName: Full=ATP-dependent RNA helicase DRS1 [Cryptococcus neoformans var. neoformans JEC21]_x0001_P0CQ93.1 RecName: Full=ATP-dependent RNA helicase DRS1 [Cryptococcus neoformans var. neoformans B-3501A]	DEAD/DEAH box helicase
MDBOrad1_00803	2E1EE@1|root,2S8RQ@2759|Eukaryota,39KS8@33154|Opisthokonta,3Q55E@4751|Fungi,3VCHB@5204|Basidiomycota	3Q55E@4751|Fungi		Anaphase-promoting complex, cyclosome, subunit 4
MDBOrad1_00804	KOG4640@1|root,KOG4640@2759|Eukaryota,39PXW@33154|Opisthokonta,3Q66Q@4751|Fungi,3V2AF@5204|Basidiomycota,2258U@155619|Agaricomycetes,3H35Q@355688|Agaricomycetes incertae sedis	3Q66Q@4751|Fungi
MDBOrad1_00805	KOG3059@1|root,KOG3059@2759|Eukaryota,39SXG@33154|Opisthokonta,3NZ4F@4751|Fungi,3V19D@5204|Basidiomycota,2254Z@155619|Agaricomycetes	3NZ4F@4751|Fungi	RecName: Full=Phosphatidylinositol N-acetylglucosaminyltransferase GPI2 subunit [Schizosaccharomyces pombe 972h-]	Phosphatidylinositol N-acetylglucosaminyltransferase		6
MDBOrad1_00806	2CEGY@1|root,2SSVN@2759|Eukaryota,3AQET@33154|Opisthokonta,3PG5F@4751|Fungi,3V6GW@5204|Basidiomycota,22DHW@155619|Agaricomycetes,3W888@5338|Agaricales	3PG5F@4751|Fungi
MDBOrad1_00807	2DA1D@1|root,2S5EX@2759|Eukaryota,3A6S0@33154|Opisthokonta,3P68Z@4751|Fungi,3V1X0@5204|Basidiomycota,224DJ@155619|Agaricomycetes,3W873@5338|Agaricales	3P68Z@4751|Fungi
MDBOrad1_00808	COG0477@1|root,KOG4686@2759|Eukaryota,3A5YG@33154|Opisthokonta,3Q3BM@4751|Fungi,3VC7N@5204|Basidiomycota,22F9R@155619|Agaricomycetes	3Q3BM@4751|Fungi	RecName: Full=60S ribosomal protein L15-B [Schizosaccharomyces pombe 972h-]	Ribosomal L15		11
MDBOrad1_00809	2ECJ9@1|root,2SIDQ@2759|Eukaryota,3AHZA@33154|Opisthokonta,3PBEU@4751|Fungi,3V4U5@5204|Basidiomycota,226JK@155619|Agaricomycetes,3W45U@5338|Agaricales	3PBEU@4751|Fungi	RecName: Full=Probable glycosidase C21B10.07 [Schizosaccharomyces pombe 972h-]		SP(Sec/SPI)		yes
MDBOrad1_00810	KOG2157@1|root,KOG2157@2759|Eukaryota,39VMM@33154|Opisthokonta,3NW1T@4751|Fungi,3V0P4@5204|Basidiomycota,228G4@155619|Agaricomycetes,3W47F@5338|Agaricales	3NW1T@4751|Fungi	RecName: Full=Probable tubulin--tyrosine ligase PBY1; AltName: Full=P-body-associated protein 1 [Saccharomyces cerevisiae S288C]	Survival protein SurE
MDBOrad1_00811	KOG3417@1|root,KOG3417@2759|Eukaryota,39K9G@33154|Opisthokonta,3Q4N8@4751|Fungi,3UYID@5204|Basidiomycota,226HQ@155619|Agaricomycetes,3W47J@5338|Agaricales	3Q4N8@4751|Fungi	RecName: Full=Ras guanine nucleotide exchange factor P; AltName: Full=RasGEF domain-containing protein P [Dictyostelium discoideum]	RasGEF domain
MDBOrad1_00812	COG0500@1|root,KOG4300@2759|Eukaryota,38HFJ@33154|Opisthokonta,3P33C@4751|Fungi,3V293@5204|Basidiomycota,22967@155619|Agaricomycetes,3H4I4@355688|Agaricomycetes incertae sedis	3P33C@4751|Fungi		Methyltransferase domain		1
MDBOrad1_00813	COG0258@1|root,KOG2519@2759|Eukaryota,38GN8@33154|Opisthokonta,3NUX0@4751|Fungi,3UYI3@5204|Basidiomycota,2286F@155619|Agaricomycetes,3H2P1@355688|Agaricomycetes incertae sedis	3NUX0@4751|Fungi	RecName: Full=Flap endonuclease 1-A; Short=FEN-1-A; AltName: Full=Flap structure-specific endonuclease 1-A [Laccaria bicolor S238N-H82]	XPG N-terminal domain
MDBOrad1_00814	2CYWP@1|root,2S6X4@2759|Eukaryota,3A8FG@33154|Opisthokonta,3P76M@4751|Fungi,3V1UD@5204|Basidiomycota,229PR@155619|Agaricomycetes,3H56Y@355688|Agaricomycetes incertae sedis	3P76M@4751|Fungi	RecName: Full=Allergen Asp f 7; AltName: Allergen=Asp f 7; Flags: Precursor [Aspergillus fumigatus Af293]		SP(Sec/SPI)		yes
MDBOrad1_00815	KOG3065@1|root,KOG3065@2759|Eukaryota,39UUG@33154|Opisthokonta,3NXKV@4751|Fungi,3V03W@5204|Basidiomycota,228J6@155619|Agaricomycetes,3W4ZH@5338|Agaricales	3NXKV@4751|Fungi	RecName: Full=Protein transport protein SEC9 [Kluyveromyces lactis NRRL Y-1140]
MDBOrad1_00816	2CYD3@1|root,2S3N6@2759|Eukaryota,39VPN@33154|Opisthokonta,3P01Q@4751|Fungi,3V1UI@5204|Basidiomycota,227HC@155619|Agaricomycetes,3H340@355688|Agaricomycetes incertae sedis	3P01Q@4751|Fungi
MDBOrad1_00817	COG3440@1|root,2QRDQ@2759|Eukaryota,397R4@33154|Opisthokonta,3P2AP@4751|Fungi,3V0FW@5204|Basidiomycota,2252S@155619|Agaricomycetes,3W4EC@5338|Agaricales	3P2AP@4751|Fungi	RecName: Full=UHRF1-like protein [Cryptococcus neoformans var. grubii H99]	SAD/SRA domain
MDBOrad1_00818	COG4286@1|root,KOG2948@2759|Eukaryota,38BVY@33154|Opisthokonta,3NVK7@4751|Fungi,3UZ5R@5204|Basidiomycota,22691@155619|Agaricomycetes,3W3F4@5338|Agaricales	3NVK7@4751|Fungi	RecName: Full=MYG1 protein C694.04c [Schizosaccharomyces pombe 972h-]	Uncharacterised protein family (UPF0160)
MDBOrad1_00819
MDBOrad1_00820					SP(Sec/SPI)	1
MDBOrad1_00821	2EIWQ@1|root,2R0UV@2759|Eukaryota,3AYJD@33154|Opisthokonta,3PJPN@4751|Fungi,3V92F@5204|Basidiomycota,22C9B@155619|Agaricomycetes,3W7Y1@5338|Agaricales	3PJPN@4751|Fungi
MDBOrad1_00822	2EDZC@1|root,2SJGT@2759|Eukaryota,3AI67@33154|Opisthokonta,3PB3R@4751|Fungi,3V3NN@5204|Basidiomycota,228FE@155619|Agaricomycetes,3W9S5@5338|Agaricales	3PB3R@4751|Fungi	RecName: Full=Fatty acid desaturase DES2; Short=SbDES2 [Sorghum bicolor]	Fatty acid desaturase		5
MDBOrad1_00823	COG5384@1|root,KOG2600@2759|Eukaryota,38HYT@33154|Opisthokonta,3NXG1@4751|Fungi,3UYKB@5204|Basidiomycota,224MK@155619|Agaricomycetes,3W4T1@5338|Agaricales	3NXG1@4751|Fungi	RecName: Full=U3 small nucleolar ribonucleoprotein protein mpp10 [Schizosaccharomyces pombe 972h-]	Mpp10 protein
MDBOrad1_00824	2EFHJ@1|root,2SKPX@2759|Eukaryota,3AGRC@33154|Opisthokonta,3PC0T@4751|Fungi,3V4DY@5204|Basidiomycota,2286U@155619|Agaricomycetes,3W5XR@5338|Agaricales	3PC0T@4751|Fungi				4
MDBOrad1_00825	2E2SU@1|root,2S9ZG@2759|Eukaryota,3A7AH@33154|Opisthokonta,3PAG7@4751|Fungi,3V3IR@5204|Basidiomycota,228K2@155619|Agaricomycetes,3H0M4@355688|Agaricomycetes incertae sedis	3PAG7@4751|Fungi		Polysaccharide lyase family 8, super-sandwich domain	SP(Sec/SPI)	1
MDBOrad1_00826	COG0092@1|root,KOG3181@2759|Eukaryota,38CWQ@33154|Opisthokonta,3NU07@4751|Fungi,3UXT7@5204|Basidiomycota,224N0@155619|Agaricomycetes,3W3G2@5338|Agaricales	3NU07@4751|Fungi	RecName: Full=40S ribosomal protein S3 [Canis lupus familiaris]_x0001_P62908.1 RecName: Full=40S ribosomal protein S3 [Mus musculus]_x0001_P62909.1 RecName: Full=40S ribosomal protein S3 [Rattus norvegicus]	Ribosomal protein S3, C-terminal domain
MDBOrad1_00827	COG0183@1|root,KOG1389@2759|Eukaryota,39593@33154|Opisthokonta,3Q10S@4751|Fungi,3VA2J@5204|Basidiomycota,22DPM@155619|Agaricomycetes,3W3VV@5338|Agaricales	3Q10S@4751|Fungi	RecName: Full=3-ketoacyl-CoA thiolase A, peroxisomal; AltName: Full=Acetyl-CoA C-myristoyltransferase; AltName: Full=Acetyl-CoA acyltransferase A; AltName: Full=Beta-ketothiolase A; AltName: Full=Peroxisomal 3-oxoacyl-CoA thiolase A; Flags: Precursor [Mus musculus]	Thiolase, N-terminal domain
MDBOrad1_00828	KOG3365@1|root,KOG3365@2759|Eukaryota,3A65M@33154|Opisthokonta,3P63R@4751|Fungi,3VBSU@5204|Basidiomycota,22EWI@155619|Agaricomycetes,3W9Z7@5338|Agaricales	3P63R@4751|Fungi	RecName: Full=NADH dehydrogenase [ubiquinone] 1 alpha subcomplex subunit 5; AltName: Full=Complex I subunit B13; AltName: Full=Complex I-13kD-B; Short=CI-13kD-B; AltName: Full=NADH-ubiquinone oxidoreductase 13 kDa-B subunit [Bos taurus]	ETC complex I subunit conserved region
MDBOrad1_00829
MDBOrad1_00830	2CZE3@1|root,2S9XR@2759|Eukaryota,3AA5C@33154|Opisthokonta,3P6T6@4751|Fungi,3V2W9@5204|Basidiomycota	3P6T6@4751|Fungi
MDBOrad1_00831	2CZE3@1|root,2S9XR@2759|Eukaryota,3AA5C@33154|Opisthokonta,3P6T6@4751|Fungi,3V2W9@5204|Basidiomycota	3P6T6@4751|Fungi
MDBOrad1_00832	KOG3117@1|root,KOG3117@2759|Eukaryota,38GU4@33154|Opisthokonta,3NY27@4751|Fungi,3V17T@5204|Basidiomycota,224HR@155619|Agaricomycetes,3W4SK@5338|Agaricales	3NY27@4751|Fungi	RecName: Full=Neuroguidin; AltName: Full=EIF4E-binding protein [Danio rerio]	Sas10/Utp3/C1D family
MDBOrad1_00833				F-box-like	SP(Sec/SPI)		yes
MDBOrad1_00834	2ESIY@1|root,2SV3M@2759|Eukaryota,3AQ7N@33154|Opisthokonta,3PFWH@4751|Fungi,3V67H@5204|Basidiomycota,22AZF@155619|Agaricomycetes,3W7TB@5338|Agaricales	3PFWH@4751|Fungi
MDBOrad1_00835	COG2940@1|root,KOG1082@2759|Eukaryota,38C0T@33154|Opisthokonta,3NZHJ@4751|Fungi,3V1G7@5204|Basidiomycota,228MJ@155619|Agaricomycetes,3W36K@5338|Agaricales	3NZHJ@4751|Fungi	RecName: Full=Histone-lysine N-methyltransferase, H3 lysine-9 specific SUVH3; AltName: Full=Histone H3-K9 methyltransferase 3; Short=H3-K9-HMTase 3; AltName: Full=Protein SET DOMAIN GROUP 19; AltName: Full=Suppressor of variegation 3-9 homolog protein 3; Short=Su(var)3-9 homolog protein 3 [Arabidopsis thaliana]	Pre-SET motif
MDBOrad1_00836	KOG1782@1|root,KOG1782@2759|Eukaryota,3A6A1@33154|Opisthokonta,3P2BY@4751|Fungi,3V1P8@5204|Basidiomycota,22F9X@155619|Agaricomycetes,3W7Q7@5338|Agaricales	3P2BY@4751|Fungi	RecName: Full=U6 snRNA-associated Sm-like protein LSm1 [Schizosaccharomyces pombe 972h-]	LSM domain
MDBOrad1_00837	KOG1632@1|root,KOG1632@2759|Eukaryota,39TSG@33154|Opisthokonta,3P16E@4751|Fungi,3V0RJ@5204|Basidiomycota,226YX@155619|Agaricomycetes,3W5NT@5338|Agaricales	3P16E@4751|Fungi		PHD-finger
MDBOrad1_00838	2CXPR@1|root,2RYXZ@2759|Eukaryota,3A5S1@33154|Opisthokonta,3Q48W@4751|Fungi,3V7N2@5204|Basidiomycota,22FSD@155619|Agaricomycetes	3Q48W@4751|Fungi		Hyaluronan / mRNA binding family
MDBOrad1_00839	COG1012@1|root,KOG2456@2759|Eukaryota,38CW8@33154|Opisthokonta,3NV38@4751|Fungi,3V4KM@5204|Basidiomycota,225TP@155619|Agaricomycetes,3W6QA@5338|Agaricales	3NV38@4751|Fungi	RecName: Full=Aldehyde dehydrogenase, dimeric NADP-preferring; AltName: Full=ALDHIII; AltName: Full=Aldehyde dehydrogenase 3; AltName: Full=Aldehyde dehydrogenase family 3 member A1 [Canis lupus familiaris]	Aldehyde dehydrogenase family
MDBOrad1_00840	COG1304@1|root,COG5274@1|root,KOG0537@2759|Eukaryota,KOG0538@2759|Eukaryota,3AEEC@33154|Opisthokonta,3PAIV@4751|Fungi,3V4A8@5204|Basidiomycota,227M1@155619|Agaricomycetes,3W5WB@5338|Agaricales	3PAIV@4751|Fungi	RecName: Full=L-lactate dehydrogenase (cytochrome); AltName: Full=Cytochrome b2; AltName: Full=Flavocytochrome b2; Short=FCB2; AltName: Full=L-lactate ferricytochrome c oxidoreductase; Short=L-LCR; Flags: Precursor [Wickerhamomyces anomalus]	FMN-dependent dehydrogenase
MDBOrad1_00841	COG1355@1|root,KOG3086@2759|Eukaryota,38CEC@33154|Opisthokonta,3NUR4@4751|Fungi,3UZ6X@5204|Basidiomycota,228K3@155619|Agaricomycetes,3W5G2@5338|Agaricales	3NUR4@4751|Fungi	RecName: Full=Protein MEMO1; AltName: Full=Mediator of ErbB2-driven cell motility 1; Short=Memo-1 [Danio rerio]	Memo-like protein
MDBOrad1_00842	COG1717@1|root,KOG0878@2759|Eukaryota,3A0DJ@33154|Opisthokonta,3P2W4@4751|Fungi,3V0V9@5204|Basidiomycota,229EK@155619|Agaricomycetes,3H53N@355688|Agaricomycetes incertae sedis	3P2W4@4751|Fungi	RecName: Full=60S ribosomal protein L32 [Canis lupus familiaris]_x0001_P62910.2 RecName: Full=60S ribosomal protein L32; AltName: Full=Large ribosomal subunit protein eL32 [Homo sapiens]_x0001_P62911.2 RecName: Full=60S ribosomal protein L32 [Mus musculus]_x0001_P62912.2 RecName: Full=60S ribosomal protein L32 [Rattus norvegicus]_x0001_Q6QAT0.3 RecName: Full=60S ribosomal protein L32 [Sus scrofa]…	Ribosomal protein L32
MDBOrad1_00843	COG0515@1|root,KOG1152@2759|Eukaryota,38BA6@33154|Opisthokonta,3NWA9@4751|Fungi,3UYXD@5204|Basidiomycota,227AH@155619|Agaricomycetes,3W5DD@5338|Agaricales	3NWA9@4751|Fungi	RecName: Full=Serine/threonine-protein kinase ppk6 [Schizosaccharomyces pombe 972h-]	Protein kinase domain
MDBOrad1_00844	COG5256@1|root,KOG0052@2759|Eukaryota,38G33@33154|Opisthokonta,3NU3J@4751|Fungi,3UYUZ@5204|Basidiomycota,22528@155619|Agaricomycetes,3W48W@5338|Agaricales	3NU3J@4751|Fungi	RecName: Full=Elongation factor 1-alpha; Short=EF-1-alpha [Schizophyllum commune]	Elongation factor Tu GTP binding domain
MDBOrad1_00845	2E0Q0@1|root,2S83X@2759|Eukaryota,3AB4N@33154|Opisthokonta,3P83Z@4751|Fungi,3V26X@5204|Basidiomycota,229JC@155619|Agaricomycetes,3H4ZY@355688|Agaricomycetes incertae sedis	3P83Z@4751|Fungi				2
MDBOrad1_00846	2BH76@1|root,2S0HV@2759|Eukaryota,39KMX@33154|Opisthokonta,3Q516@4751|Fungi,3V0SF@5204|Basidiomycota,224ZG@155619|Agaricomycetes,3W9YA@5338|Agaricales	3Q516@4751|Fungi	RecName: Full=Spore development regulator umv1 [Ustilago maydis 521]	Velvet factor
MDBOrad1_00847	28UGT@1|root,2R17J@2759|Eukaryota,3932X@33154|Opisthokonta,3NURA@4751|Fungi,3UZM4@5204|Basidiomycota,226X0@155619|Agaricomycetes,3W5QB@5338|Agaricales	3NURA@4751|Fungi	RecName: Full=Tip elongation aberrant protein Tea4; AltName: Full=Cell polarity protein tea4; AltName: Full=Win1-interacting SH3 domain protein [Schizosaccharomyces pombe 972h-]	Ras association (RalGDS/AF-6) domain
MDBOrad1_00848	2DZZR@1|root,2S7FU@2759|Eukaryota,3A8RH@33154|Opisthokonta,3P7Z6@4751|Fungi,3V2G4@5204|Basidiomycota,225WD@155619|Agaricomycetes,3W7A1@5338|Agaricales	3P7Z6@4751|Fungi	RecName: Full=Elongator complex protein 5; AltName: Full=Dermal papilla-derived protein 6; AltName: Full=S-phase 2 protein [Homo sapiens]	Elongator subunit Iki1
MDBOrad1_00849	COG0517@1|root,KOG1764@2759|Eukaryota,38BHA@33154|Opisthokonta,3NXN4@4751|Fungi,3UZFC@5204|Basidiomycota,225C8@155619|Agaricomycetes	3NXN4@4751|Fungi	RecName: Full=5'-AMP-activated protein kinase subunit gamma; Short=AMPK gamma; Short=AMPK subunit gamma [Schizosaccharomyces pombe 972h-]	CBS domain
MDBOrad1_00850	KOG1477@1|root,KOG1477@2759|Eukaryota,38H25@33154|Opisthokonta,3NZ1J@4751|Fungi,3UZG1@5204|Basidiomycota,22636@155619|Agaricomycetes,3W5CE@5338|Agaricales	3NZ1J@4751|Fungi	RecName: Full=Protein ssh4 [Neurospora crassa OR74A]	SPRY domain		1
MDBOrad1_00851						1
MDBOrad1_00852	COG0017@1|root,KOG0556@2759|Eukaryota,38CRQ@33154|Opisthokonta,3NUP6@4751|Fungi,3UYR3@5204|Basidiomycota,224WD@155619|Agaricomycetes,3W37G@5338|Agaricales	3NUP6@4751|Fungi	RecName: Full=Aspartate--tRNA ligase, cytoplasmic; AltName: Full=Aspartyl-tRNA synthetase; Short=AspRS [Schizosaccharomyces pombe 972h-]	tRNA synthetases class II (D, K and N)
MDBOrad1_00853	COG1448@1|root,KOG1411@2759|Eukaryota,38ED5@33154|Opisthokonta,3NU8Q@4751|Fungi,3UZ3P@5204|Basidiomycota,2258P@155619|Agaricomycetes,3W49D@5338|Agaricales	3NU8Q@4751|Fungi	RecName: Full=Aspartate aminotransferase, mitochondrial; Short=mAspAT; AltName: Full=Glutamate oxaloacetate transaminase 2; AltName: Full=Kynurenine aminotransferase 4; AltName: Full=Kynurenine aminotransferase IV; AltName: Full=Kynurenine--oxoglutarate transaminase 4; AltName: Full=Kynurenine--oxoglutarate transaminase IV; AltName: Full=Transaminase A; Flags: Precursor [Xenopus tropicalis]	Aminotransferase class I and II
MDBOrad1_00854
MDBOrad1_00855	29UXG@1|root,2RXJQ@2759|Eukaryota,38GJY@33154|Opisthokonta,3NZ6A@4751|Fungi,3V0P1@5204|Basidiomycota,225HX@155619|Agaricomycetes,3W5KM@5338|Agaricales	3NZ6A@4751|Fungi		PX domain	SP(Sec/SPI)		yes
MDBOrad1_00856	COG5053@1|root,KOG1670@2759|Eukaryota,39SFW@33154|Opisthokonta,3NYNX@4751|Fungi,3UYD2@5204|Basidiomycota,224NM@155619|Agaricomycetes,3H0M6@355688|Agaricomycetes incertae sedis	3NYNX@4751|Fungi	RecName: Full=Eukaryotic translation initiation factor 4E-1; Short=eIF-4E-1; Short=eIF4E-1; AltName: Full=eIF-4F 25 kDa subunit 1; AltName: Full=mRNA cap-binding protein 1 [Schizosaccharomyces pombe 972h-]	Eukaryotic initiation factor 4E
MDBOrad1_00857	KOG0761@1|root,KOG0761@2759|Eukaryota,38GBT@33154|Opisthokonta,3NTYN@4751|Fungi,3V0QB@5204|Basidiomycota,227GK@155619|Agaricomycetes,3W44N@5338|Agaricales	3NTYN@4751|Fungi	RecName: Full=Probable mitochondrial glutathione transporter SLC25A39; AltName: Full=Solute carrier family 25 member 39 [Mus musculus]	Mitochondrial carrier protein		1
MDBOrad1_00858	28HQE@1|root,2QQ1T@2759|Eukaryota,39G00@33154|Opisthokonta,3NWMJ@4751|Fungi,3V279@5204|Basidiomycota,225JE@155619|Agaricomycetes,3W913@5338|Agaricales	3NWMJ@4751|Fungi		Eisosome component PIL1
MDBOrad1_00859	2EN2D@1|root,2SRK6@2759|Eukaryota,3AP99@33154|Opisthokonta,3PEI8@4751|Fungi,3V5WF@5204|Basidiomycota,229W6@155619|Agaricomycetes,3H5G9@355688|Agaricomycetes incertae sedis	3PEI8@4751|Fungi
MDBOrad1_00860	2C2KV@1|root,2SP4Y@2759|Eukaryota,3AKWC@33154|Opisthokonta,3PDUH@4751|Fungi,3V5GP@5204|Basidiomycota,229YU@155619|Agaricomycetes,3H5BZ@355688|Agaricomycetes incertae sedis	3PDUH@4751|Fungi
MDBOrad1_00861	KOG3026@1|root,KOG3026@2759|Eukaryota,39V6S@33154|Opisthokonta,3PCSW@4751|Fungi,3V4YY@5204|Basidiomycota,22E4Y@155619|Agaricomycetes	3PCSW@4751|Fungi		Survival motor neuron protein (SMN)
MDBOrad1_00862	COG0478@1|root,KOG2268@2759|Eukaryota,38HTH@33154|Opisthokonta,3NX5X@4751|Fungi,3UYCE@5204|Basidiomycota,22554@155619|Agaricomycetes,3W5TI@5338|Agaricales	3NX5X@4751|Fungi	RecName: Full=Serine/threonine-protein kinase rio2 [Schizosaccharomyces pombe 972h-]	RIO1 family
MDBOrad1_00863	2E0B6@1|root,2S7S9@2759|Eukaryota,3A5WR@33154|Opisthokonta,3P5DC@4751|Fungi,3V273@5204|Basidiomycota,22ACN@155619|Agaricomycetes,3W7F6@5338|Agaricales	3P5DC@4751|Fungi		ESSS subunit of NADH:ubiquinone oxidoreductase (complex I)		1
MDBOrad1_00864	COG0509@1|root,KOG3373@2759|Eukaryota,3A5U5@33154|Opisthokonta,3P4M7@4751|Fungi,3V179@5204|Basidiomycota,229HQ@155619|Agaricomycetes,3W7SN@5338|Agaricales	3P4M7@4751|Fungi	RecName: Full=Putative glycine cleavage system H protein, mitochondrial; AltName: Full=Glycine decarboxylase complex subunit H; Flags: Precursor [Schizosaccharomyces pombe 972h-]	Glycine cleavage H-protein
MDBOrad1_00865	COG0050@1|root,KOG0460@2759|Eukaryota,38BHM@33154|Opisthokonta,3NV4W@4751|Fungi,3UY68@5204|Basidiomycota,225UB@155619|Agaricomycetes,3H111@355688|Agaricomycetes incertae sedis	3NV4W@4751|Fungi	RecName: Full=Elongation factor Tu, mitochondrial; AltName: Full=tufM; Flags: Precursor [Saccharomyces cerevisiae S288C]	Elongation factor Tu GTP binding domain
MDBOrad1_00866	KOG2629@1|root,KOG2629@2759|Eukaryota,38HJ0@33154|Opisthokonta,3NZWU@4751|Fungi	3NZWU@4751|Fungi		Pex14 N-terminal domain
MDBOrad1_00867	28USC@1|root,2R1HB@2759|Eukaryota,39EUE@33154|Opisthokonta,3NYHQ@4751|Fungi,3V4F9@5204|Basidiomycota,22FQ2@155619|Agaricomycetes,3H46P@355688|Agaricomycetes incertae sedis	3NYHQ@4751|Fungi		GRIP domain
MDBOrad1_00868	COG1230@1|root,KOG1483@2759|Eukaryota,38CHY@33154|Opisthokonta,3NV9V@4751|Fungi,3UY0Z@5204|Basidiomycota,22729@155619|Agaricomycetes,3W5KJ@5338|Agaricales	3NV9V@4751|Fungi	RecName: Full=Zinc/cadmium resistance protein [Saccharomyces cerevisiae S288C]	Cation efflux family		6
MDBOrad1_00869	KOG1560@1|root,KOG1560@2759|Eukaryota,3906S@33154|Opisthokonta,3NW8Q@4751|Fungi,3V0Q0@5204|Basidiomycota,225FN@155619|Agaricomycetes,3W5YB@5338|Agaricales	3NW8Q@4751|Fungi	RecName: Full=Eukaryotic translation initiation factor 3 subunit H; Short=eIF3h [Ustilago maydis 521]	C-terminal region of eIF3h
MDBOrad1_00870	2BWW6@1|root,2S2E4@2759|Eukaryota,3A6M5@33154|Opisthokonta,3P58T@4751|Fungi,3VBXY@5204|Basidiomycota,22F12@155619|Agaricomycetes,3H8R2@355688|Agaricomycetes incertae sedis	3P58T@4751|Fungi		Lytic transglycolase	SP(Sec/SPI)		yes
MDBOrad1_00871	KOG2149@1|root,KOG2149@2759|Eukaryota,38JUN@33154|Opisthokonta,3NZQK@4751|Fungi,3V0G9@5204|Basidiomycota,227RF@155619|Agaricomycetes,3H3BG@355688|Agaricomycetes incertae sedis	3NZQK@4751|Fungi	RecName: Full=Pre-rRNA-processing protein ipi1 [Schizosaccharomyces pombe 972h-]	Rix1 complex component involved in 60S ribosome maturation
MDBOrad1_00872	COG3934@1|root,2QS4Q@2759|Eukaryota,39KXX@33154|Opisthokonta,3Q5BK@4751|Fungi,3V4NR@5204|Basidiomycota,2265P@155619|Agaricomycetes,3H1BC@355688|Agaricomycetes incertae sedis	3Q5BK@4751|Fungi	RecName: Full=Probable mannan endo-1,4-beta-mannosidase A; AltName: Full=Endo-beta-1,4-mannanase A; Flags: Precursor [Aspergillus fischeri NRRL 181]	Cellulase (glycosyl hydrolase family 5)	SP(Sec/SPI)		yes
MDBOrad1_00873	KOG4680@1|root,KOG4680@2759|Eukaryota,3A444@33154|Opisthokonta,3P3WJ@4751|Fungi,3V17W@5204|Basidiomycota,229TC@155619|Agaricomycetes	3P3WJ@4751|Fungi	RecName: Full=Phosphatidylglycerol/phosphatidylinositol transfer protein; Short=PG/PI-TP; Flags: Precursor [Cryptococcus neoformans var. neoformans JEC21]_x0001_P0CP29.1 RecName: Full=Phosphatidylglycerol/phosphatidylinositol transfer protein; Short=PG/PI-TP; Flags: Precursor [Cryptococcus neoformans var. neoformans B-3501A]	ML domain	SP(Sec/SPI)		yes
MDBOrad1_00874	2D9R0@1|root,2S5E6@2759|Eukaryota,3A7CF@33154|Opisthokonta,3P5G5@4751|Fungi,3V1KI@5204|Basidiomycota,22523@155619|Agaricomycetes,3W5ZZ@5338|Agaricales	3P5G5@4751|Fungi				4
MDBOrad1_00875	COG0203@1|root,KOG3280@2759|Eukaryota,3A5T5@33154|Opisthokonta,3P1YY@4751|Fungi,3V1ED@5204|Basidiomycota,226KD@155619|Agaricomycetes,3H3R4@355688|Agaricomycetes incertae sedis	3P1YY@4751|Fungi	RecName: Full=50S ribosomal protein L17 [Cupriavidus metallidurans CH34]	Ribosomal protein L17
MDBOrad1_00876	COG0236@1|root,KOG1748@2759|Eukaryota,3A92K@33154|Opisthokonta,3P3WN@4751|Fungi,3V1VW@5204|Basidiomycota,22AAM@155619|Agaricomycetes,3W7X2@5338|Agaricales	3P3WN@4751|Fungi	RecName: Full=Acyl carrier protein, mitochondrial; Short=ACP; AltName: Full=NADH-ubiquinone oxidoreductase 9.6 kDa subunit; Flags: Precursor [Neurospora crassa OR74A]	Phosphopantetheine attachment site
MDBOrad1_00877	COG0102@1|root,KOG3204@2759|Eukaryota,38EAZ@33154|Opisthokonta,3NUWA@4751|Fungi,3UZ8Z@5204|Basidiomycota,227D0@155619|Agaricomycetes,3H3E9@355688|Agaricomycetes incertae sedis	3NUWA@4751|Fungi	RecName: Full=60S ribosomal protein L16; AltName: Full=Cytoplasmic ribosomal protein 46 [Neurospora crassa OR74A]	Ribosomal protein L13
MDBOrad1_00878	KOG2190@1|root,KOG2190@2759|Eukaryota,38G1X@33154|Opisthokonta,3NW5E@4751|Fungi,3UXYW@5204|Basidiomycota,224GK@155619|Agaricomycetes,3H39J@355688|Agaricomycetes incertae sedis	3NW5E@4751|Fungi	RecName: Full=RNA-binding protein rnc1; AltName: Full=RNA-binding protein that suppresses calcineurin deletion 1 [Schizosaccharomyces pombe 972h-]	KH domain
MDBOrad1_00879	2CYPM@1|root,2S5GS@2759|Eukaryota,3947I@33154|Opisthokonta,3P6B4@4751|Fungi,3V1S7@5204|Basidiomycota,228D1@155619|Agaricomycetes,3W6RA@5338|Agaricales	3P6B4@4751|Fungi		Nuclear fragile X mental retardation-interacting protein 1 (NUFIP1)
MDBOrad1_00880	COG1026@1|root,KOG0961@2759|Eukaryota,38C6N@33154|Opisthokonta,3NV61@4751|Fungi,3UYS4@5204|Basidiomycota,224QN@155619|Agaricomycetes,3H0Z7@355688|Agaricomycetes incertae sedis	3NV61@4751|Fungi	RecName: Full=Uncharacterized protein YOL098C [Saccharomyces cerevisiae S288C]	Peptidase M16 inactive domain
MDBOrad1_00881	COG5239@1|root,KOG2338@2759|Eukaryota,38CFQ@33154|Opisthokonta,3NTWQ@4751|Fungi,3V0ES@5204|Basidiomycota,228C9@155619|Agaricomycetes,3W5PX@5338|Agaricales	3NTWQ@4751|Fungi	RecName: Full=RNA exonuclease NGL2; AltName: Full=Carbon catabolite repressor protein 4 homolog [Saccharomyces cerevisiae S288C]	Endonuclease/Exonuclease/phosphatase family
MDBOrad1_00882	28J6J@1|root,2QRIS@2759|Eukaryota,39VSU@33154|Opisthokonta,3NYZ1@4751|Fungi,3UY6W@5204|Basidiomycota,225AQ@155619|Agaricomycetes,3W4E0@5338|Agaricales	3NYZ1@4751|Fungi		RhoGEF domain
MDBOrad1_00883
MDBOrad1_00884	28NRZ@1|root,2QVC1@2759|Eukaryota,39VAE@33154|Opisthokonta,3NX03@4751|Fungi,3V0T7@5204|Basidiomycota,2284U@155619|Agaricomycetes,3W4ZW@5338|Agaricales	3NX03@4751|Fungi		Fungal specific transcription factor domain
MDBOrad1_00885	COG2124@1|root,KOG0156@2759|Eukaryota,38BSU@33154|Opisthokonta,3NUFV@4751|Fungi,3UZYG@5204|Basidiomycota,226YP@155619|Agaricomycetes,3W5EG@5338|Agaricales	3NUFV@4751|Fungi	RecName: Full=Cytochrome P450 monooxygenase 88 [Postia placenta Mad-698-R]	Cytochrome P450
MDBOrad1_00886	COG5084@1|root,KOG1040@2759|Eukaryota,38HDS@33154|Opisthokonta,3NYHY@4751|Fungi,3V0Y9@5204|Basidiomycota,227CV@155619|Agaricomycetes,3H1KQ@355688|Agaricomycetes incertae sedis	3NYHY@4751|Fungi	RecName: Full=mRNA 3'-end-processing protein YTH1 [Cryptococcus neoformans var. neoformans JEC21]_x0001_P0CS65.1 RecName: Full=mRNA 3'-end-processing protein YTH1 [Cryptococcus neoformans var. neoformans B-3501A]	Zinc finger C-x8-C-x5-C-x3-H type (and similar)
MDBOrad1_00887	COG2124@1|root,KOG0156@2759|Eukaryota,3AFV2@33154|Opisthokonta,3PAPP@4751|Fungi,3V4X1@5204|Basidiomycota,2268W@155619|Agaricomycetes,3W3A3@5338|Agaricales	3PAPP@4751|Fungi	RecName: Full=Cytochrome P450 monooxygenase COX2; AltName: Full=Alpha-cuprenene oxidase 2 [Coprinopsis cinerea okayama7#130]	Cytochrome P450
MDBOrad1_00888	2EEBP@1|root,2SJSD@2759|Eukaryota,3AEFM@33154|Opisthokonta,3PABH@4751|Fungi,3V3MS@5204|Basidiomycota,228KX@155619|Agaricomycetes,3W3RU@5338|Agaricales	3PABH@4751|Fungi		Fungal specific transcription factor domain
MDBOrad1_00889	2EFM9@1|root,2SKSU@2759|Eukaryota,3AG25@33154|Opisthokonta,3PCXU@4751|Fungi,3V3AM@5204|Basidiomycota,2265X@155619|Agaricomycetes,3W32V@5338|Agaricales	3PCXU@4751|Fungi				1
MDBOrad1_00890	COG1100@1|root,KOG0393@2759|Eukaryota,38BJN@33154|Opisthokonta,3NWUJ@4751|Fungi,3UZ0J@5204|Basidiomycota,224NN@155619|Agaricomycetes,3W50F@5338|Agaricales	3NWUJ@4751|Fungi	RecName: Full=Ras-related C3 botulinum toxin substrate 3; AltName: Full=p21-Rac3; Flags: Precursor [Homo sapiens]_x0001_P60764.1 RecName: Full=Ras-related C3 botulinum toxin substrate 3; AltName: Full=p21-Rac3; Flags: Precursor [Mus musculus]	Ras family
MDBOrad1_00891	2CK85@1|root,2R93U@2759|Eukaryota,3AYNK@33154|Opisthokonta,3PJST@4751|Fungi,3V96H@5204|Basidiomycota,228H5@155619|Agaricomycetes,3W3EU@5338|Agaricales	3PJST@4751|Fungi
MDBOrad1_00892	COG2363@1|root,KOG3472@2759|Eukaryota,3A3W4@33154|Opisthokonta,3P7QB@4751|Fungi,3V25N@5204|Basidiomycota,22A8J@155619|Agaricomycetes	3P7QB@4751|Fungi	RecName: Full=UPF0382 membrane protein C1782.12c; Flags: Precursor [Schizosaccharomyces pombe 972h-]	Protein of unknown function (DUF423)		4
MDBOrad1_00893	COG0293@1|root,KOG1098@2759|Eukaryota,38B6C@33154|Opisthokonta,3NUYV@4751|Fungi,3UZ7T@5204|Basidiomycota,2255Q@155619|Agaricomycetes,3H1NP@355688|Agaricomycetes incertae sedis	3NUYV@4751|Fungi	RecName: Full=AdoMet-dependent rRNA methyltransferase SPB1; AltName: Full=2'-O-ribose RNA methyltransferase; AltName: Full=S-adenosyl-L-methionine-dependent methyltransferase [Cryptococcus neoformans var. neoformans JEC21]_x0001_P0CS79.1 RecName: Full=AdoMet-dependent rRNA methyltransferase SPB1; AltName: Full=2'-O-ribose RNA methyltransferase; AltName: Full=S-adenosyl-L-methionine-dependent meth…	Spb1 C-terminal domain
MDBOrad1_00894	2CUKD@1|root,2S4E9@2759|Eukaryota,3AFAW@33154|Opisthokonta,3P6IH@4751|Fungi,3V5N4@5204|Basidiomycota,228TV@155619|Agaricomycetes,3W8CN@5338|Agaricales	3P6IH@4751|Fungi		Mitochondrial inner-membrane-bound regulator
MDBOrad1_00895	COG5354@1|root,KOG2314@2759|Eukaryota,38C0Z@33154|Opisthokonta,3NXCR@4751|Fungi,3UY09@5204|Basidiomycota,22BK5@155619|Agaricomycetes,3W4KS@5338|Agaricales	3NXCR@4751|Fungi	RecName: Full=Eukaryotic translation initiation factor 3 subunit B; Short=eIF3b; AltName: Full=Eukaryotic translation initiation factor 3 90 kDa subunit homolog; Short=eIF3 p90; AltName: Full=Translation initiation factor eIF3 p90 subunit homolog [Ustilago maydis 521]	Eukaryotic translation initiation factor eIF2A
MDBOrad1_00896	2ER7R@1|root,2SU2J@2759|Eukaryota,3ARRC@33154|Opisthokonta,3PFEP@4751|Fungi,3V6JC@5204|Basidiomycota,22AVU@155619|Agaricomycetes,3W8CI@5338|Agaricales	3PFEP@4751|Fungi		Domain of unknown function (DUF6697)
MDBOrad1_00897	COG0508@1|root,KOG0557@2759|Eukaryota,38BJW@33154|Opisthokonta,3NVAH@4751|Fungi,3UZKB@5204|Basidiomycota,226S6@155619|Agaricomycetes,3H3WY@355688|Agaricomycetes incertae sedis	3NVAH@4751|Fungi	RecName: Full=Dihydrolipoyllysine-residue acetyltransferase component of pyruvate dehydrogenase complex, mitochondrial; AltName: Full=Dihydrolipoamide acetyltransferase component of pyruvate dehydrogenase complex; AltName: Full=Pyruvate dehydrogenase complex component E2; Short=PDC-E2; Short=PDCE2; Flags: Precursor [Schizosaccharomyces pombe 972h-]	2-oxoacid dehydrogenases acyltransferase (catalytic domain)
MDBOrad1_00898	KOG1853@1|root,KOG1853@2759|Eukaryota,38DN4@33154|Opisthokonta,3NYEU@4751|Fungi,3V1EH@5204|Basidiomycota,22611@155619|Agaricomycetes,3W3MD@5338|Agaricales	3NYEU@4751|Fungi	RecName: Full=Nuclear distribution protein nudE homolog 1 [Cryptococcus neoformans var. neoformans B-3501A]	NUDE protein, C-terminal conserved region
MDBOrad1_00899	KOG2627@1|root,KOG2627@2759|Eukaryota,39S3X@33154|Opisthokonta,3NX6G@4751|Fungi,3V1C9@5204|Basidiomycota,224D3@155619|Agaricomycetes,3W50W@5338|Agaricales	3NX6G@4751|Fungi	RecName: Full=Splicing factor ESS-2 homolog; AltName: Full=Protein Es2; AltName: Full=dEs2 [Drosophila melanogaster]	Nuclear protein Es2
MDBOrad1_00900	KOG4036@1|root,KOG4036@2759|Eukaryota,39Y1P@33154|Opisthokonta,3P8GI@4751|Fungi,3V1W0@5204|Basidiomycota,229QG@155619|Agaricomycetes,3H58J@355688|Agaricomycetes incertae sedis	3P8GI@4751|Fungi		FAM192A/Fyv6, N-terminal domain
MDBOrad1_00901	2CMBW@1|root,2QPXG@2759|Eukaryota,39R1H@33154|Opisthokonta,3NYVU@4751|Fungi,3V22E@5204|Basidiomycota,226M9@155619|Agaricomycetes,3W5DH@5338|Agaricales	3NYVU@4751|Fungi				4
MDBOrad1_00902	COG0697@1|root,KOG2765@2759|Eukaryota,38EPP@33154|Opisthokonta,3NXNP@4751|Fungi,3UXWT@5204|Basidiomycota,227SX@155619|Agaricomycetes	3NXNP@4751|Fungi	RecName: Full=Uncharacterized transporter C405.03c [Schizosaccharomyces pombe 972h-]	EamA-like transporter family		10
MDBOrad1_00903	2E2BH@1|root,2S9JI@2759|Eukaryota,3AC3Z@33154|Opisthokonta,3P9IV@4751|Fungi,3V31G@5204|Basidiomycota,22A48@155619|Agaricomycetes,3H5IV@355688|Agaricomycetes incertae sedis	3P9IV@4751|Fungi		Ribosome biogenesis protein SLX9
MDBOrad1_00904	2BU36@1|root,2S22A@2759|Eukaryota,3A4RA@33154|Opisthokonta,3P3M9@4751|Fungi,3V134@5204|Basidiomycota,2283E@155619|Agaricomycetes,3W3Z9@5338|Agaricales	3P3M9@4751|Fungi
MDBOrad1_00905	KOG2859@1|root,KOG2859@2759|Eukaryota,38DE8@33154|Opisthokonta,3P7E9@4751|Fungi,3V5MG@5204|Basidiomycota,22A3K@155619|Agaricomycetes,3W7XE@5338|Agaricales	3P7E9@4751|Fungi	RecName: Full=DNA repair protein XRCC2 homolog; AltName: Full=X-ray repair cross-complementing protein 2 homolog; Short=AtXRCC2 [Arabidopsis thaliana]
MDBOrad1_00906	2EE0E@1|root,2SJHH@2759|Eukaryota,3AFJ5@33154|Opisthokonta,3PAAJ@4751|Fungi,3V3GD@5204|Basidiomycota,227Z2@155619|Agaricomycetes,3W362@5338|Agaricales	3PAAJ@4751|Fungi	RecName: Full=AMP-binding domain-containing enzyme iboA; AltName: Full=Ibotenic acid biosynthesis cluster protein A [Amanita muscaria Koide BX008]	AMP-binding enzyme
MDBOrad1_00907	KOG4197@1|root,KOG4197@2759|Eukaryota,3AAM7@33154|Opisthokonta,3P75B@4751|Fungi,3V2D0@5204|Basidiomycota,22DVH@155619|Agaricomycetes	3P75B@4751|Fungi		Pentatricopeptide repeat domain
MDBOrad1_00908	28MVV@1|root,2S1Z0@2759|Eukaryota,38KRN@33154|Opisthokonta,3PNMJ@4751|Fungi,3VA6S@5204|Basidiomycota,22DU8@155619|Agaricomycetes,3W90D@5338|Agaricales	3PNMJ@4751|Fungi	RecName: Full=bZIP transcription factor hapX; AltName: Full=Iron acquisition regulator hapX [Aspergillus fumigatus Af293]	Minimal binding motif of Hap4 for binding to Hap2/3/5
MDBOrad1_00909	COG0533@1|root,KOG2708@2759|Eukaryota,38BGR@33154|Opisthokonta,3NV5V@4751|Fungi,3UZKR@5204|Basidiomycota,228KQ@155619|Agaricomycetes,3W5K1@5338|Agaricales	3NV5V@4751|Fungi	RecName: Full=tRNA N6-adenosine threonylcarbamoyltransferase; AltName: Full=N6-L-threonylcarbamoyladenine synthase; Short=t(6)A synthase; AltName: Full=t(6)A37 threonylcarbamoyladenosine biosynthesis protein KAE1; AltName: Full=tRNA threonylcarbamoyladenosine biosynthesis protein KAE1 [Cryptococcus neoformans var. neoformans JEC21]_x0001_P0CQ15.1 RecName: Full=tRNA N6-adenosine threonylcarbamoylt…	tRNA N6-adenosine threonylcarbamoyltransferase
MDBOrad1_00910	COG5597@1|root,KOG1950@2759|Eukaryota,39TYB@33154|Opisthokonta,3NVI2@4751|Fungi,3V0DQ@5204|Basidiomycota,22738@155619|Agaricomycetes,3H3HD@355688|Agaricomycetes incertae sedis	3NVI2@4751|Fungi	RecName: Full=Galactinol synthase 5; Short=AtGolS5; Short=GolS-5 [Arabidopsis thaliana]	Glycosyl transferase family 8
MDBOrad1_00911	COG0320@1|root,KOG2672@2759|Eukaryota,38EBV@33154|Opisthokonta,3NWHD@4751|Fungi,3UZRN@5204|Basidiomycota,225UZ@155619|Agaricomycetes,3W5TS@5338|Agaricales	3NWHD@4751|Fungi	RecName: Full=Lipoyl synthase, mitochondrial; AltName: Full=Lipoate synthase; Short=LS; Short=Lip-syn; AltName: Full=Lipoic acid synthase; Flags: Precursor [Coprinopsis cinerea okayama7#130]	N-terminal domain of lipoyl synthase of Radical_SAM family
MDBOrad1_00912	2E77T@1|root,2SDUV@2759|Eukaryota,39KM5@33154|Opisthokonta,3Q50G@4751|Fungi,3VCB3@5204|Basidiomycota	3Q50G@4751|Fungi		Cytochrome c oxidase biogenesis protein Cmc1 like
MDBOrad1_00913	KOG4186@1|root,KOG4186@2759|Eukaryota,38B7Q@33154|Opisthokonta,3NWIA@4751|Fungi,3V0HY@5204|Basidiomycota,225ZN@155619|Agaricomycetes,3W6AI@5338|Agaricales	3NWIA@4751|Fungi	RecName: Full=Peroxisomal membrane protein PMP30B; AltName: Full=Peroxin-11B; AltName: Full=Peroxisomal membrane protein PMP32 [[Candida] boidinii]	Peroxisomal biogenesis factor 11 (PEX11)
MDBOrad1_00914	COG0114@1|root,KOG1317@2759|Eukaryota,38GHX@33154|Opisthokonta,3NTY2@4751|Fungi,3UYYY@5204|Basidiomycota,22745@155619|Agaricomycetes,3H0PY@355688|Agaricomycetes incertae sedis	3NTY2@4751|Fungi	RecName: Full=Fumarate hydratase, mitochondrial; Short=Fumarase; Flags: Precursor [Rhizopus arrhizus]	Lyase
MDBOrad1_00915	COG0553@1|root,KOG0388@2759|Eukaryota,3AIZX@33154|Opisthokonta,3NVFX@4751|Fungi,3UZ9Y@5204|Basidiomycota,226AI@155619|Agaricomycetes,3W3J4@5338|Agaricales	3NVFX@4751|Fungi	RecName: Full=Chromatin-remodeling ATPase INO80 [Ustilago maydis 521]	SNF2-related domain
MDBOrad1_00916	COG0484@1|root,KOG0714@2759|Eukaryota,39TYJ@33154|Opisthokonta,3P0U5@4751|Fungi,3V0WV@5204|Basidiomycota,2284J@155619|Agaricomycetes,3W5QR@5338|Agaricales	3P0U5@4751|Fungi	RecName: Full=Uncharacterized J domain-containing protein C63.13 [Schizosaccharomyces pombe 972h-]	DnaJ domain
MDBOrad1_00917	2EGN8@1|root,2SMIW@2759|Eukaryota,3AFYI@33154|Opisthokonta,3PC16@4751|Fungi,3V4A2@5204|Basidiomycota,228FG@155619|Agaricomycetes,3W7J8@5338|Agaricales	3PC16@4751|Fungi				6
MDBOrad1_00918	2CK84@1|root,2S54T@2759|Eukaryota,3A775@33154|Opisthokonta,3P5S2@4751|Fungi,3V1XP@5204|Basidiomycota,227N1@155619|Agaricomycetes,3H0H6@355688|Agaricomycetes incertae sedis	3P5S2@4751|Fungi		LIM domain
MDBOrad1_00919	COG1304@1|root,COG5274@1|root,KOG0537@2759|Eukaryota,KOG0538@2759|Eukaryota,3AEEC@33154|Opisthokonta,3PAIV@4751|Fungi,3V4A8@5204|Basidiomycota,227M1@155619|Agaricomycetes,3W5WB@5338|Agaricales	3PAIV@4751|Fungi	RecName: Full=L-lactate dehydrogenase (cytochrome); AltName: Full=Cytochrome b2; AltName: Full=Flavocytochrome b2; Short=FCB2; AltName: Full=L-lactate ferricytochrome c oxidoreductase; Short=L-LCR; Flags: Precursor [Wickerhamomyces anomalus]	FMN-dependent dehydrogenase
MDBOrad1_00920	2D27G@1|root,2SKRB@2759|Eukaryota,3AI3M@33154|Opisthokonta,3PB83@4751|Fungi,3V4VG@5204|Basidiomycota,2292B@155619|Agaricomycetes,3W825@5338|Agaricales	3PB83@4751|Fungi
MDBOrad1_00921	KOG0660@1|root,KOG0660@2759|Eukaryota,38BZX@33154|Opisthokonta,3NUS8@4751|Fungi,3UYBT@5204|Basidiomycota,226GT@155619|Agaricomycetes,3W4KH@5338|Agaricales	3NUS8@4751|Fungi	RecName: Full=Mitogen-activated protein kinase; AltName: Full=FsMAPK [Fusarium vanettenii]	Protein kinase domain
MDBOrad1_00922	2CAHR@1|root,2SIDF@2759|Eukaryota,3AIFX@33154|Opisthokonta,3PAN9@4751|Fungi,3V4IQ@5204|Basidiomycota,225RF@155619|Agaricomycetes,3H308@355688|Agaricomycetes incertae sedis	3PAN9@4751|Fungi			SP(Sec/SPI)		yes
MDBOrad1_00923	COG0318@1|root,KOG1176@2759|Eukaryota,39R7B@33154|Opisthokonta,3P154@4751|Fungi,3V3YK@5204|Basidiomycota,225CX@155619|Agaricomycetes,3W32Z@5338|Agaricales	3P154@4751|Fungi		AMP-binding enzyme
MDBOrad1_00924	COG0130@1|root,KOG2529@2759|Eukaryota,38DDS@33154|Opisthokonta,3NVVD@4751|Fungi,3UY56@5204|Basidiomycota,226A2@155619|Agaricomycetes,3W3WB@5338|Agaricales	3NVVD@4751|Fungi	RecName: Full=H/ACA ribonucleoprotein complex subunit CBF5; AltName: Full=Centromere-binding factor 5; AltName: Full=H/ACA snoRNP protein CBF5; AltName: Full=Small nucleolar RNP protein CBF5 [Candida albicans SC5314]	DKCLD (NUC011) domain
MDBOrad1_00925	KOG0663@1|root,KOG0663@2759|Eukaryota,38C2D@33154|Opisthokonta,3NTY5@4751|Fungi,3V00R@5204|Basidiomycota,227JD@155619|Agaricomycetes,3W3WP@5338|Agaricales	3NTY5@4751|Fungi	RecName: Full=Serine/threonine-protein kinase ppk23 [Schizosaccharomyces pombe 972h-]	Protein kinase domain
MDBOrad1_00926	2949T@1|root,2RB6U@2759|Eukaryota,3AH34@33154|Opisthokonta,3PIT3@4751|Fungi,3V3SX@5204|Basidiomycota,226K3@155619|Agaricomycetes,3H416@355688|Agaricomycetes incertae sedis	3PIT3@4751|Fungi		BRCT domain, a BRCA1 C-terminus domain
MDBOrad1_00927	2BU79@1|root,2S22M@2759|Eukaryota,3A2ZR@33154|Opisthokonta,3P34Y@4751|Fungi,3V0Y4@5204|Basidiomycota,2288C@155619|Agaricomycetes,3W3I1@5338|Agaricales	3P34Y@4751|Fungi		GYF domain
MDBOrad1_00928	COG0277@1|root,KOG1232@2759|Eukaryota,38DBR@33154|Opisthokonta,3NUGN@4751|Fungi,3UXY3@5204|Basidiomycota,227JR@155619|Agaricomycetes,3W4AP@5338|Agaricales	3NUGN@4751|Fungi	RecName: Full=Putative D-lactate dehydrogenase C713.03, mitochondrial; Flags: Precursor [Schizosaccharomyces pombe 972h-]	FAD linked oxidases, C-terminal domain
MDBOrad1_00929	COG0318@1|root,KOG1176@2759|Eukaryota,38D1V@33154|Opisthokonta,3NX59@4751|Fungi,3UYDQ@5204|Basidiomycota,225BP@155619|Agaricomycetes	3NX59@4751|Fungi	RecName: Full=Acetate/butyrate--CoA ligase AAE7, peroxisomal; AltName: Full=AMP-binding protein 7; Short=AtAMPBP7; AltName: Full=Acetyl-CoA synthetase; AltName: Full=Acyl-activating enzyme 7; AltName: Full=Butyryl-CoA synthetase; AltName: Full=Protein ACETATE NON-UTILIZING 1 [Arabidopsis thaliana]	AMP-binding enzyme
MDBOrad1_00930	28K3W@1|root,2QSID@2759|Eukaryota,38HYU@33154|Opisthokonta,3P1BQ@4751|Fungi,3V4XY@5204|Basidiomycota,228CX@155619|Agaricomycetes,3W64J@5338|Agaricales	3P1BQ@4751|Fungi		Alginate lyase	SP(Sec/SPI)		yes
MDBOrad1_00931	KOG0092@1|root,KOG0092@2759|Eukaryota,38HB3@33154|Opisthokonta,3NY6F@4751|Fungi,3UZJH@5204|Basidiomycota,225HR@155619|Agaricomycetes,3W484@5338|Agaricales	3NY6F@4751|Fungi	RecName: Full=Ras-related protein Rab-5B [Gallus gallus]	Ras family
MDBOrad1_00932	2CYM2@1|root,2S53D@2759|Eukaryota,3A7SF@33154|Opisthokonta,3P6GZ@4751|Fungi,3V20J@5204|Basidiomycota,224YR@155619|Agaricomycetes,3W5RH@5338|Agaricales	3P6GZ@4751|Fungi
MDBOrad1_00933	28VVX@1|root,2R2MQ@2759|Eukaryota,3AYBM@33154|Opisthokonta,3PJGB@4751|Fungi,3V8TR@5204|Basidiomycota,22DGZ@155619|Agaricomycetes,3W8KS@5338|Agaricales	3PJGB@4751|Fungi
MDBOrad1_00934	KOG2354@1|root,KOG2354@2759|Eukaryota,38C3W@33154|Opisthokonta,3P4AV@4751|Fungi,3VBXB@5204|Basidiomycota,22F0J@155619|Agaricomycetes,3H8QQ@355688|Agaricomycetes incertae sedis	3P4AV@4751|Fungi		RPC5 protein
MDBOrad1_00935	2BKZ3@1|root,2S1JP@2759|Eukaryota,3A17B@33154|Opisthokonta,3P28P@4751|Fungi,3V5NC@5204|Basidiomycota,22A62@155619|Agaricomycetes,3W97R@5338|Agaricales	3P28P@4751|Fungi			SP(Sec/SPI)	4
MDBOrad1_00936	COG5333@1|root,KOG2496@2759|Eukaryota,38DJD@33154|Opisthokonta,3NUG0@4751|Fungi,3V0K7@5204|Basidiomycota,2270P@155619|Agaricomycetes,3W5BF@5338|Agaricales	3NUG0@4751|Fungi	RecName: Full=Cyclin mcs2; AltName: Full=Mitotic catastrophe suppressor 2 [Schizosaccharomyces pombe 972h-]	Cyclin C-terminal domain
MDBOrad1_00937	2E28N@1|root,2SCT1@2759|Eukaryota,3AC0C@33154|Opisthokonta,3P921@4751|Fungi,3V2RM@5204|Basidiomycota,22A8E@155619|Agaricomycetes,3W88D@5338|Agaricales	3P921@4751|Fungi		Eukaryotic protein of unknown function (DUF1764)
MDBOrad1_00938	KOG2744@1|root,KOG2744@2759|Eukaryota,38I3G@33154|Opisthokonta,3NYPP@4751|Fungi,3V1GP@5204|Basidiomycota,224T4@155619|Agaricomycetes,3W4SP@5338|Agaricales	3NYPP@4751|Fungi	RecName: Full=SWI/SNF chromatin-remodeling complex subunit sol1; AltName: Full=SWI/SNF complex subunit sol1; AltName: Full=Switch one-like protein; AltName: Full=Transcription regulatory protein sol1 [Schizosaccharomyces pombe 972h-]	ARID/BRIGHT DNA binding domain
MDBOrad1_00939	COG1643@1|root,KOG0920@2759|Eukaryota,38B5Q@33154|Opisthokonta,3NWAW@4751|Fungi,3UZPR@5204|Basidiomycota,224B6@155619|Agaricomycetes,3W688@5338|Agaricales	3NWAW@4751|Fungi	RecName: Full=Uncharacterized helicase C15C4.05 [Schizosaccharomyces pombe 972h-]	Helicase associated domain (HA2)
MDBOrad1_00940	KOG2157@1|root,KOG2157@2759|Eukaryota,38HUI@33154|Opisthokonta,3P009@4751|Fungi,3V0N0@5204|Basidiomycota,228GY@155619|Agaricomycetes,3H0FM@355688|Agaricomycetes incertae sedis	3P009@4751|Fungi	RecName: Full=Probable tubulin--tyrosine ligase C12B10.04 [Schizosaccharomyces pombe 972h-]	Tubulin-tyrosine ligase family
MDBOrad1_00941	28N9G@1|root,2QUUW@2759|Eukaryota,38DHT@33154|Opisthokonta,3NU1T@4751|Fungi,3V0FU@5204|Basidiomycota,227JB@155619|Agaricomycetes,3W43T@5338|Agaricales	3NU1T@4751|Fungi	RecName: Full=Maintenance of mitochondrial morphology protein 1 [Coprinopsis cinerea okayama7#130]	Maintenance of mitochondrial morphology protein 1		1
MDBOrad1_00942	KOG3400@1|root,KOG3400@2759|Eukaryota,3A3E0@33154|Opisthokonta,3P46H@4751|Fungi,3V23U@5204|Basidiomycota,228WE@155619|Agaricomycetes	3P46H@4751|Fungi	RecName: Full=DNA-directed RNA polymerases I, II, and III subunit RPABC3; Short=RNA polymerases I, II, and III subunit ABC3; AltName: Full=ABC14.4; AltName: Full=ABC14.5; AltName: Full=DNA-directed RNA polymerases I, II, and III 14.5 kDa polypeptide [Saccharomyces cerevisiae S288C]	RNA polymerase Rpb8
MDBOrad1_00943	2CPRJ@1|root,2R2GF@2759|Eukaryota,3AYB8@33154|Opisthokonta,3PJFY@4751|Fungi,3V8T9@5204|Basidiomycota,22DGI@155619|Agaricomycetes,3W9K9@5338|Agaricales	3PJFY@4751|Fungi
MDBOrad1_00944	COG5307@1|root,KOG0929@2759|Eukaryota,39SV3@33154|Opisthokonta,3NW3N@4751|Fungi,3UYBS@5204|Basidiomycota,226GQ@155619|Agaricomycetes,3W53U@5338|Agaricales	3NW3N@4751|Fungi	RecName: Full=Pescadillo homolog; AltName: Full=Nucleolar protein 7 homolog [Laccaria bicolor S238N-H82]	Pescadillo N-terminus
MDBOrad1_00945	COG1958@1|root,KOG3459@2759|Eukaryota,3A1WS@33154|Opisthokonta,3P45M@4751|Fungi,3V0WE@5204|Basidiomycota,229JZ@155619|Agaricomycetes,3W75U@5338|Agaricales	3P45M@4751|Fungi	RecName: Full=Small nuclear ribonucleoprotein Sm D2; Short=Sm-D2; AltName: Full=Complexed with cdc5 protein 9; AltName: Full=snRNP core protein D2 [Schizosaccharomyces pombe 972h-]	LSM domain
MDBOrad1_00946	2E5E5@1|root,2SC82@2759|Eukaryota,3ACZN@33154|Opisthokonta,3P9GT@4751|Fungi,3V32S@5204|Basidiomycota,2273I@155619|Agaricomycetes,3W539@5338|Agaricales	3P9GT@4751|Fungi
MDBOrad1_00947	COG5024@1|root,KOG0653@2759|Eukaryota,39V2P@33154|Opisthokonta,3NVG0@4751|Fungi,3UYB1@5204|Basidiomycota,2281M@155619|Agaricomycetes,3W4N8@5338|Agaricales	3NVG0@4751|Fungi	RecName: Full=G1/S-specific cyclin CCN1 [Candida albicans SC5314]	Cyclin, N-terminal domain
MDBOrad1_00948	28MYE@1|root,2QUH1@2759|Eukaryota,38DEZ@33154|Opisthokonta,3NWZI@4751|Fungi,3V3KK@5204|Basidiomycota,225C0@155619|Agaricomycetes,3W4J5@5338|Agaricales	3NWZI@4751|Fungi		Oxidoreductase family, NAD-binding Rossmann fold
MDBOrad1_00949	2D1GY@1|root,2SI2Z@2759|Eukaryota,3AFWF@33154|Opisthokonta,3PA54@4751|Fungi,3V3TP@5204|Basidiomycota,22ER7@155619|Agaricomycetes,3W5Z3@5338|Agaricales	3PA54@4751|Fungi
MDBOrad1_00950	29D67@1|root,2RKA1@2759|Eukaryota,38FRY@33154|Opisthokonta,3NY8J@4751|Fungi,3V3QQ@5204|Basidiomycota,228ME@155619|Agaricomycetes,3H82K@355688|Agaricomycetes incertae sedis	3NY8J@4751|Fungi		FAD dependent oxidoreductase
MDBOrad1_00951	COG0477@1|root,COG5105@1|root,KOG2533@2759|Eukaryota,KOG3772@2759|Eukaryota,38CJ6@33154|Opisthokonta,3NV36@4751|Fungi,3V3PY@5204|Basidiomycota,22BGS@155619|Agaricomycetes	3NV36@4751|Fungi	RecName: Full=MFS-type transporter efuF; AltName: Full=Enfumafungin biosynthesis cluster protein F [Hormonema carpetanum]	Transmembrane amino acid transporter protein		21
MDBOrad1_00952	KOG3252@1|root,KOG3252@2759|Eukaryota,38GM1@33154|Opisthokonta,3NZ55@4751|Fungi,3V1RX@5204|Basidiomycota,228R6@155619|Agaricomycetes,3W6PB@5338|Agaricales	3NZ55@4751|Fungi	RecName: Full=Eukaryotic translation initiation factor 3 subunit K; Short=eIF3k; AltName: Full=eIF-3 p25 [Cryptococcus neoformans var. neoformans JEC21]_x0001_P0CN55.1 RecName: Full=Eukaryotic translation initiation factor 3 subunit K; Short=eIF3k; AltName: Full=eIF-3 p25 [Cryptococcus neoformans var. neoformans B-3501A]	CSN8/PSMD8/EIF3K family
MDBOrad1_00953	KOG0266@1|root,KOG0266@2759|Eukaryota,38D84@33154|Opisthokonta,3NXHV@4751|Fungi,3V0GQ@5204|Basidiomycota,226YR@155619|Agaricomycetes,3H146@355688|Agaricomycetes incertae sedis	3NXHV@4751|Fungi	RecName: Full=WD repeat-containing protein 5B [Rattus norvegicus]	WD domain, G-beta repeat
MDBOrad1_00954	2AT5F@1|root,2RZRD@2759|Eukaryota,3A1N3@33154|Opisthokonta,3P3EX@4751|Fungi,3V7M5@5204|Basidiomycota,2269R@155619|Agaricomycetes,3H39G@355688|Agaricomycetes incertae sedis	3P3EX@4751|Fungi		Glutathione S-transferase, N-terminal domain
MDBOrad1_00955	COG2340@1|root,KOG3017@2759|Eukaryota,3A626@33154|Opisthokonta,3NZQD@4751|Fungi,3V1R8@5204|Basidiomycota,22907@155619|Agaricomycetes,3W72B@5338|Agaricales	3NZQD@4751|Fungi	RecName: Full=Protein PRY2; AltName: Full=Pathogenesis-related protein 2; Flags: Precursor [Saccharomyces cerevisiae S288C]	Cysteine-rich secretory protein family	SP(Sec/SPI)		yes
MDBOrad1_00956	2EQMN@1|root,2STKX@2759|Eukaryota,3ARAQ@33154|Opisthokonta,3PFR8@4751|Fungi,3V6F8@5204|Basidiomycota,22DDW@155619|Agaricomycetes,3W8K9@5338|Agaricales	3PFR8@4751|Fungi
MDBOrad1_00957	KOG3306@1|root,KOG3306@2759|Eukaryota,3AC0F@33154|Opisthokonta,3P3QI@4751|Fungi,3V35Q@5204|Basidiomycota,229BQ@155619|Agaricomycetes,3W7AH@5338|Agaricales	3P3QI@4751|Fungi		ER membrane protein complex subunit 7, beta-sandwich domain	SP(Sec/SPI)	1
MDBOrad1_00958	COG1412@1|root,KOG3164@2759|Eukaryota,38GU1@33154|Opisthokonta,3NX8A@4751|Fungi,3V0NW@5204|Basidiomycota,22E6A@155619|Agaricomycetes,3H8AB@355688|Agaricomycetes incertae sedis	3NX8A@4751|Fungi	RecName: Full=rRNA-processing protein UTP23; AltName: Full=U three protein 23; AltName: Full=U3 small nucleolar RNA-associated protein 23; Short=U3 snoRNA-associated protein 23 [Saccharomyces cerevisiae S288C]	Fcf1
MDBOrad1_00959	KOG2798@1|root,KOG2798@2759|Eukaryota,38H1C@33154|Opisthokonta,3NWES@4751|Fungi,3UZ5H@5204|Basidiomycota,226MD@155619|Agaricomycetes,3H13S@355688|Agaricomycetes incertae sedis	3NWES@4751|Fungi	RecName: Full=Carnosine N-methyltransferase [Gallus gallus]	Carnosine N-methyltransferase
MDBOrad1_00960	COG0543@1|root,KOG0534@2759|Eukaryota,38GQ8@33154|Opisthokonta,3NW9T@4751|Fungi,3UYK0@5204|Basidiomycota,2250Y@155619|Agaricomycetes,3W3WU@5338|Agaricales	3NW9T@4751|Fungi	RecName: Full=NADH-cytochrome b5 reductase 1; AltName: Full=Microsomal cytochrome b reductase [Laccaria bicolor S238N-H82]	Oxidoreductase FAD-binding domain	SP(Sec/SPI)	2
MDBOrad1_00961	2D2X6@1|root,2SPCF@2759|Eukaryota,3AMCS@33154|Opisthokonta,3PDY1@4751|Fungi,3V5KC@5204|Basidiomycota,229V5@155619|Agaricomycetes,3W8HG@5338|Agaricales	3PDY1@4751|Fungi				6
MDBOrad1_00962	KOG3195@1|root,KOG3195@2759|Eukaryota,39WB2@33154|Opisthokonta,3P0YN@4751|Fungi,3V0MS@5204|Basidiomycota,225AG@155619|Agaricomycetes,3W5S2@5338|Agaricales	3P0YN@4751|Fungi	RecName: Full=Golgi apparatus membrane protein TVP23 [Coprinopsis cinerea okayama7#130]	Eukaryotic protein of unknown function (DUF846)		4
MDBOrad1_00963	COG2453@1|root,KOG1717@2759|Eukaryota,39KW2@33154|Opisthokonta,3Q59N@4751|Fungi,3V7D5@5204|Basidiomycota,22FFD@155619|Agaricomycetes,3WA37@5338|Agaricales	3Q59N@4751|Fungi	RecName: Full=Dual specificity protein phosphatase 2; AltName: Full=Dual specificity protein phosphatase PAC-1 [Mus musculus]	Dual specificity phosphatase, catalytic domain
MDBOrad1_00964	28IP3@1|root,2QR03@2759|Eukaryota,396BN@33154|Opisthokonta,3NXB9@4751|Fungi,3V4ZJ@5204|Basidiomycota,2255J@155619|Agaricomycetes,3W3Q8@5338|Agaricales	3NXB9@4751|Fungi	RecName: Full=Xyloglucanase; Short=XG; AltName: Full=Cel74a; Flags: Precursor [Trichoderma reesei QM6a]	Sortilin, neurotensin receptor 3,	SP(Sec/SPI)		yes
MDBOrad1_00965	2E3WC@1|root,2SAW1@2759|Eukaryota,3A5X7@33154|Opisthokonta,3P5M3@4751|Fungi,3V1MJ@5204|Basidiomycota,227VA@155619|Agaricomycetes,3W91F@5338|Agaricales	3P5M3@4751|Fungi
MDBOrad1_00966	28IP3@1|root,2QR03@2759|Eukaryota,396BN@33154|Opisthokonta,3NXB9@4751|Fungi,3V4ZJ@5204|Basidiomycota,2255J@155619|Agaricomycetes,3H315@355688|Agaricomycetes incertae sedis	3NXB9@4751|Fungi	RecName: Full=Xyloglucanase; Short=XG; AltName: Full=Cel74a; Flags: Precursor [Trichoderma reesei QM6a]	Fungal cellulose binding domain	SP(Sec/SPI)		yes
MDBOrad1_00967	2EYIV@1|root,2RBNA@2759|Eukaryota,3AY41@33154|Opisthokonta,3PJ98@4751|Fungi,3V8JI@5204|Basidiomycota,22D80@155619|Agaricomycetes,3W9JD@5338|Agaricales	3PJ98@4751|Fungi
MDBOrad1_00968	COG0531@1|root,KOG1286@2759|Eukaryota,38DMK@33154|Opisthokonta,3NUN0@4751|Fungi,3UXX5@5204|Basidiomycota,226HI@155619|Agaricomycetes,3H4EQ@355688|Agaricomycetes incertae sedis	3NUN0@4751|Fungi	RecName: Full=Proline-specific permease; AltName: Full=Proline transport protein [Aspergillus nidulans FGSC A4]	Amino acid permease		12
MDBOrad1_00969	COG4886@1|root,KOG3519@1|root,KOG0532@2759|Eukaryota,KOG3519@2759|Eukaryota,39KMP@33154|Opisthokonta,3Q50Z@4751|Fungi,3VCBM@5204|Basidiomycota,22FJB@155619|Agaricomycetes,3WA4H@5338|Agaricales	3Q50Z@4751|Fungi	RecName: Full=Guanine exchange factor for Rac 30 [Dictyostelium discoideum]	RhoGEF domain
MDBOrad1_00970	KOG3949@1|root,KOG3949@2759|Eukaryota,38DZW@33154|Opisthokonta,3NVWH@4751|Fungi,3V150@5204|Basidiomycota,224JF@155619|Agaricomycetes,3W69J@5338|Agaricales	3NVWH@4751|Fungi	RecName: Full=Elongator complex protein 4 [Xenopus laevis]	PAXNEB protein
MDBOrad1_00971	KOG4234@1|root,KOG4234@2759|Eukaryota,38H74@33154|Opisthokonta,3P42H@4751|Fungi,3V131@5204|Basidiomycota,227IH@155619|Agaricomycetes,3H23Q@355688|Agaricomycetes incertae sedis	3P42H@4751|Fungi
MDBOrad1_00972	2EFP5@1|root,2SKUC@2759|Eukaryota,3AIS1@33154|Opisthokonta,3PCER@4751|Fungi,3V4U7@5204|Basidiomycota,227N9@155619|Agaricomycetes,3W701@5338|Agaricales	3PCER@4751|Fungi
MDBOrad1_00973	28NTN@1|root,2QVDM@2759|Eukaryota,39UMP@33154|Opisthokonta,3NXS0@4751|Fungi,3V0SU@5204|Basidiomycota,224Y3@155619|Agaricomycetes,3W47I@5338|Agaricales	3NXS0@4751|Fungi
MDBOrad1_00974	COG0204@1|root,KOG1505@2759|Eukaryota,38DTT@33154|Opisthokonta,3NV8M@4751|Fungi,3UYIZ@5204|Basidiomycota,2260U@155619|Agaricomycetes,3W554@5338|Agaricales	3NV8M@4751|Fungi	RecName: Full=Uncharacterized acyltransferase C428.14 [Schizosaccharomyces pombe 972h-]	Acyltransferase		1
MDBOrad1_00975	2EH93@1|root,2SMZE@2759|Eukaryota,3AJSK@33154|Opisthokonta,3PD85@4751|Fungi,3V5BA@5204|Basidiomycota,229BV@155619|Agaricomycetes,3W78B@5338|Agaricales	3PD85@4751|Fungi
MDBOrad1_00976	COG3194@1|root,2QTP8@2759|Eukaryota,38F5U@33154|Opisthokonta,3NY2G@4751|Fungi,3UZE0@5204|Basidiomycota,22778@155619|Agaricomycetes,3W32D@5338|Agaricales	3NY2G@4751|Fungi
MDBOrad1_00977	2CF9W@1|root,2RC16@2759|Eukaryota,3AYBZ@33154|Opisthokonta,3PJGN@4751|Fungi,3V8U3@5204|Basidiomycota,22B8R@155619|Agaricomycetes,3W9HQ@5338|Agaricales	3PJGN@4751|Fungi			SP(Sec/SPI)	1
MDBOrad1_00978	28NTN@1|root,2QVDM@2759|Eukaryota,39UMP@33154|Opisthokonta,3NXS0@4751|Fungi,3V8N1@5204|Basidiomycota,22DAR@155619|Agaricomycetes,3W61G@5338|Agaricales	3NXS0@4751|Fungi	RecName: Full=Ino eighty subunit 1 [Aspergillus nidulans FGSC A4]
MDBOrad1_00979	28T1W@1|root,2QZS0@2759|Eukaryota,3A3SS@33154|Opisthokonta,3Q37T@4751|Fungi,3V195@5204|Basidiomycota,22751@155619|Agaricomycetes,3WA17@5338|Agaricales	3Q37T@4751|Fungi	RecName: Full=Septin homolog spn3 [Schizosaccharomyces pombe 972h-]	Septin
MDBOrad1_00980	COG0249@1|root,2QUUG@2759|Eukaryota,39J73@33154|Opisthokonta,3NVM1@4751|Fungi,3UYCM@5204|Basidiomycota,228JN@155619|Agaricomycetes,3W542@5338|Agaricales	3NVM1@4751|Fungi	RecName: Full=MutS protein homolog 1 [Schizosaccharomyces pombe 972h-]	MutS domain V
MDBOrad1_00981	COG1048@1|root,KOG0453@2759|Eukaryota,38DMZ@33154|Opisthokonta,3NV5K@4751|Fungi,3V01W@5204|Basidiomycota,2280Q@155619|Agaricomycetes,3W5IX@5338|Agaricales	3NV5K@4751|Fungi	RecName: Full=Homocitrate dehydratase, mitochondrial; AltName: Full=Aconitase 2; Flags: Precursor [Schizosaccharomyces pombe 972h-]	Aconitase family (aconitate hydratase)
MDBOrad1_00982	COG0330@1|root,KOG3083@2759|Eukaryota,38DP2@33154|Opisthokonta,3NW8M@4751|Fungi,3UYHI@5204|Basidiomycota,224P7@155619|Agaricomycetes,3W90T@5338|Agaricales	3NW8M@4751|Fungi	RecName: Full=Prohibitin-1 [Saccharomyces cerevisiae S288C]	SPFH domain / Band 7 family	SP(Sec/SPI)		yes
MDBOrad1_00983	KOG0118@1|root,KOG0118@2759|Eukaryota,39JCJ@33154|Opisthokonta,3NV1Z@4751|Fungi,3UZHM@5204|Basidiomycota,2259H@155619|Agaricomycetes,3W54T@5338|Agaricales	3NV1Z@4751|Fungi	RecName: Full=Oligouridylate-binding protein 1A; Short=AtUBP1a; AltName: Full=Polyuridylate-binding protein UBP1A; Short=Poly(U)-binding protein UBP1A [Arabidopsis thaliana]	RNA recognition motif. (a.k.a. RRM, RBD, or RNP domain)
MDBOrad1_00984	2D93F@1|root,2S5CU@2759|Eukaryota,3A71A@33154|Opisthokonta,3P52W@4751|Fungi,3V1JG@5204|Basidiomycota,22E8J@155619|Agaricomycetes	3P52W@4751|Fungi		Autophagy protein 16 (ATG16)
MDBOrad1_00985	KOG0394@1|root,KOG0394@2759|Eukaryota,38C61@33154|Opisthokonta,3NWMV@4751|Fungi,3UZW6@5204|Basidiomycota,224G7@155619|Agaricomycetes,3W40S@5338|Agaricales	3NWMV@4751|Fungi	RecName: Full=Ras-related protein rab7 [Epinephelus coioides]	Ras family
MDBOrad1_00986	COG0477@1|root,KOG2533@2759|Eukaryota,38EDR@33154|Opisthokonta,3NU3S@4751|Fungi,3V3UW@5204|Basidiomycota,225TY@155619|Agaricomycetes	3NU3S@4751|Fungi	RecName: Full=Uncharacterized transporter C757.13 [Schizosaccharomyces pombe 972h-]	Major Facilitator Superfamily		9
MDBOrad1_00987	COG0367@1|root,KOG0573@2759|Eukaryota,38G4S@33154|Opisthokonta,3NVJ7@4751|Fungi,3UY9D@5204|Basidiomycota,225I7@155619|Agaricomycetes,3W54P@5338|Agaricales	3NVJ7@4751|Fungi	RecName: Full=Asparagine synthetase domain-containing protein 1; AltName: Full=HCV NS3-transactivated protein 1 [Homo sapiens]	Asparagine synthase
MDBOrad1_00988	COG0362@1|root,KOG2653@2759|Eukaryota,38BP7@33154|Opisthokonta,3NVGP@4751|Fungi,3UYMC@5204|Basidiomycota,226YN@155619|Agaricomycetes,3W4HY@5338|Agaricales	3NVGP@4751|Fungi	RecName: Full=6-phosphogluconate dehydrogenase, decarboxylating [Cunninghamella elegans]	6-phosphogluconate dehydrogenase, C-terminal domain
MDBOrad1_00989	KOG1737@1|root,KOG1737@2759|Eukaryota,38D4N@33154|Opisthokonta,3NVUP@4751|Fungi,3UZH2@5204|Basidiomycota,224YS@155619|Agaricomycetes,3W3PH@5338|Agaricales	3NVUP@4751|Fungi	RecName: Full=Oxysterol-binding protein-related protein 3; Short=ORP-3; Short=OSBP-related protein 3 [Homo sapiens]	Oxysterol-binding protein
MDBOrad1_00990	COG0363@1|root,KOG3147@2759|Eukaryota,39U1J@33154|Opisthokonta,3NY1P@4751|Fungi,3UYNM@5204|Basidiomycota,225SZ@155619|Agaricomycetes,3W4DH@5338|Agaricales	3NY1P@4751|Fungi	RecName: Full=Probable 6-phosphogluconolactonase; Short=6PGL [Schizosaccharomyces pombe 972h-]	Glucosamine-6-phosphate isomerases/6-phosphogluconolactonase
MDBOrad1_00991	COG0115@1|root,KOG0975@2759|Eukaryota,38GTA@33154|Opisthokonta,3NVAG@4751|Fungi,3UZ23@5204|Basidiomycota,225KZ@155619|Agaricomycetes,3W4WW@5338|Agaricales	3NVAG@4751|Fungi	RecName: Full=Branched-chain-amino-acid aminotransferase, mitochondrial; Short=BCAT; AltName: Full=Protein ECA39; AltName: Full=Protein TWT1; Flags: Precursor [Saccharomyces cerevisiae S288C]	Amino-transferase class IV		1
MDBOrad1_00992	2A7I9@1|root,2RYEC@2759|Eukaryota,39TH7@33154|Opisthokonta,3P14S@4751|Fungi,3V2JW@5204|Basidiomycota,226R0@155619|Agaricomycetes,3W3VP@5338|Agaricales	3P14S@4751|Fungi		PXA domain
MDBOrad1_00993	KOG2135@1|root,KOG2135@2759|Eukaryota,38FES@33154|Opisthokonta,3NY31@4751|Fungi,3UZXF@5204|Basidiomycota,227BA@155619|Agaricomycetes,3H0XE@355688|Agaricomycetes incertae sedis	3NY31@4751|Fungi	RecName: Full=RNA-binding protein 26; AltName: Full=CTCL tumor antigen se70-2; AltName: Full=RNA-binding motif protein 26 [Homo sapiens]	PWI domain
MDBOrad1_00994	COG1111@1|root,KOG0354@2759|Eukaryota,38BSM@33154|Opisthokonta,3NUYD@4751|Fungi,3UXX2@5204|Basidiomycota,226FF@155619|Agaricomycetes,3W66P@5338|Agaricales	3NUYD@4751|Fungi	RecName: Full=ATP-dependent DNA helicase mph1; AltName: Full=FANCM-like protein 1 [Aspergillus niger CBS 513.88]	Type III restriction enzyme, res subunit
MDBOrad1_00995	COG1965@1|root,KOG3413@2759|Eukaryota,3A3XZ@33154|Opisthokonta,3P5HA@4751|Fungi,3V2AG@5204|Basidiomycota,22A2H@155619|Agaricomycetes,3W7NW@5338|Agaricales	3P5HA@4751|Fungi	RecName: Full=Frataxin homolog, mitochondrial; Flags: Precursor [Schizosaccharomyces pombe 972h-]	Frataxin-like domain
MDBOrad1_00996	2EWYI@1|root,2SYPV@2759|Eukaryota,3AVIY@33154|Opisthokonta,3PIJI@4751|Fungi,3V6WU@5204|Basidiomycota,22B4A@155619|Agaricomycetes,3W89M@5338|Agaricales	3PIJI@4751|Fungi
MDBOrad1_00997	KOG0772@1|root,KOG0772@2759|Eukaryota,38FE9@33154|Opisthokonta,3NV0U@4751|Fungi,3UZX5@5204|Basidiomycota,226JX@155619|Agaricomycetes,3W4AK@5338|Agaricales	3NV0U@4751|Fungi	RecName: Full=WD repeat-containing protein 70 [Bos taurus]	WD domain, G-beta repeat
MDBOrad1_00998	COG5076@1|root,KOG1474@2759|Eukaryota,38EH8@33154|Opisthokonta,3NVXS@4751|Fungi,3V0VY@5204|Basidiomycota,22DPI@155619|Agaricomycetes,3W3R7@5338|Agaricales	3NVXS@4751|Fungi	RecName: Full=SWR1 complex bromodomain subunit bdf1 [Schizosaccharomyces pombe 972h-]	Bromodomain
MDBOrad1_00999	28JT5@1|root,2S1PS@2759|Eukaryota,39KTJ@33154|Opisthokonta,3P4E8@4751|Fungi,3V1GK@5204|Basidiomycota,22723@155619|Agaricomycetes,3W5Z7@5338|Agaricales	3P4E8@4751|Fungi		G-patch domain
MDBOrad1_01000	COG0638@1|root,KOG0180@2759|Eukaryota,38GZR@33154|Opisthokonta,3NWF8@4751|Fungi,3UZX3@5204|Basidiomycota,227WJ@155619|Agaricomycetes,3W3FR@5338|Agaricales	3NWF8@4751|Fungi	RecName: Full=Proteasome subunit beta type-3; AltName: Full=Macropain subunit PUP3; AltName: Full=Multicatalytic endopeptidase complex subunit PUP3; AltName: Full=Proteasome component PUP3 [Saccharomyces cerevisiae S288C]	Proteasome subunit
MDBOrad1_01001	COG0607@1|root,KOG1530@2759|Eukaryota,3A884@33154|Opisthokonta,3P5AA@4751|Fungi,3VBYR@5204|Basidiomycota,22F1W@155619|Agaricomycetes,3W7MZ@5338|Agaricales	3P5AA@4751|Fungi	RecName: Full=Putative thiosulfate sulfurtransferase, mitochondrial; AltName: Full=Rhodanese-like protein; Flags: Precursor [Schizosaccharomyces pombe 972h-]	Rhodanese-like domain
MDBOrad1_01002	2CZ8K@1|root,2S92W@2759|Eukaryota,3A2YI@33154|Opisthokonta,3P690@4751|Fungi,3V259@5204|Basidiomycota,229NG@155619|Agaricomycetes,3W80H@5338|Agaricales	3P690@4751|Fungi		Family of unknown function (DUF6595)	SP(Sec/SPI)	1
MDBOrad1_01003	2CZ8K@1|root,2S92W@2759|Eukaryota,3A2YI@33154|Opisthokonta,3P690@4751|Fungi,3V259@5204|Basidiomycota,229NG@155619|Agaricomycetes,3H52A@355688|Agaricomycetes incertae sedis	3P690@4751|Fungi	RecName: Full=Copper acquisition factor BIM1; AltName: Full=BCS-inducible membrane protein 1; AltName: Full=Lytic polysaccharide monooxygenase-like protein BIM1; Short=LPMO-like protein BIM1; Flags: Precursor [Cryptococcus neoformans var. grubii H99]	Family of unknown function (DUF6595)	SP(Sec/SPI)		yes
MDBOrad1_01004	2CSHV@1|root,2RBZN@2759|Eukaryota,3AYB5@33154|Opisthokonta,3PJFV@4751|Fungi,3V8T5@5204|Basidiomycota,22DGD@155619|Agaricomycetes,3W88G@5338|Agaricales	3PJFV@4751|Fungi
MDBOrad1_01005	COG2897@1|root,KOG1529@2759|Eukaryota,38CX1@33154|Opisthokonta,3NVFN@4751|Fungi,3V0A9@5204|Basidiomycota,2260C@155619|Agaricomycetes	3NVFN@4751|Fungi	RecName: Full=Probable 3-mercaptopyruvate sulfurtransferase; Short=MST [Schizosaccharomyces pombe 972h-]	Rhodanese-like domain
MDBOrad1_01006	COG5127@1|root,KOG2909@2759|Eukaryota,38C54@33154|Opisthokonta,3NVXU@4751|Fungi,3UY0D@5204|Basidiomycota,225BC@155619|Agaricomycetes,3W4C2@5338|Agaricales	3NVXU@4751|Fungi	RecName: Full=V-type proton ATPase subunit C 1-B; Short=V-ATPase subunit C 1-B; AltName: Full=Vacuolar proton pump subunit C 1-B [Danio rerio]	V-ATPase subunit C
MDBOrad1_01007	KOG2208@1|root,KOG2208@2759|Eukaryota,38GK3@33154|Opisthokonta,3NVGC@4751|Fungi,3UYSZ@5204|Basidiomycota,227S1@155619|Agaricomycetes,3W5CP@5338|Agaricales	3NVGC@4751|Fungi	RecName: Full=K homology domain-containing protein 4 [Ustilago maydis 521]	KH domain
MDBOrad1_01008	KOG1814@1|root,KOG1814@2759|Eukaryota,38D5P@33154|Opisthokonta,3NY15@4751|Fungi,3V0KZ@5204|Basidiomycota,225MF@155619|Agaricomycetes,3W661@5338|Agaricales	3NY15@4751|Fungi		RWD domain
MDBOrad1_01009	2DDJ0@1|root,2S5N7@2759|Eukaryota,3A698@33154|Opisthokonta,3P64D@4751|Fungi,3V1YA@5204|Basidiomycota,226XM@155619|Agaricomycetes,3W68M@5338|Agaricales	3P64D@4751|Fungi		Urb2/Npa2 family
MDBOrad1_01010	COG2008@1|root,KOG1368@2759|Eukaryota,38EQY@33154|Opisthokonta,3NWDM@4751|Fungi,3UZP4@5204|Basidiomycota,224IX@155619|Agaricomycetes,3W328@5338|Agaricales	3NWDM@4751|Fungi	RecName: Full=Probable low-specificity L-threonine aldolase [Schizosaccharomyces pombe 972h-]	Beta-eliminating lyase
MDBOrad1_01011	2DZSG@1|root,2S798@2759|Eukaryota,3A8MZ@33154|Opisthokonta,3P6S6@4751|Fungi,3V331@5204|Basidiomycota,22ARF@155619|Agaricomycetes,3H6G9@355688|Agaricomycetes incertae sedis	3P6S6@4751|Fungi		Zinc-binding
MDBOrad1_01012	KOG3480@1|root,KOG3480@2759|Eukaryota,3A8N1@33154|Opisthokonta,3P6VS@4751|Fungi,3V28Y@5204|Basidiomycota,22DDC@155619|Agaricomycetes,3W7UH@5338|Agaricales	3P6VS@4751|Fungi	RecName: Full=Mitochondrial import inner membrane translocase subunit TIM10 [Cryptococcus neoformans var. neoformans JEC21]_x0001_P0CR99.1 RecName: Full=Mitochondrial import inner membrane translocase subunit TIM10 [Cryptococcus neoformans var. neoformans B-3501A]	Tim10/DDP family zinc finger
MDBOrad1_01013	KOG2048@1|root,KOG2048@2759|Eukaryota,38EUF@33154|Opisthokonta,3NUQJ@4751|Fungi,3UZ4I@5204|Basidiomycota,225YC@155619|Agaricomycetes,3W4SJ@5338|Agaricales	3NUQJ@4751|Fungi	RecName: Full=U3 small nucleolar RNA-associated protein 4; Short=U3 snoRNA-associated protein 4; AltName: Full=U3 protein 4 required for transcription [Schizosaccharomyces pombe 972h-]	WD domain, G-beta repeat
MDBOrad1_01014	COG1100@1|root,KOG0395@2759|Eukaryota,38FTP@33154|Opisthokonta,3NW4A@4751|Fungi,3V0KP@5204|Basidiomycota,224CJ@155619|Agaricomycetes,3W3E0@5338|Agaricales	3NW4A@4751|Fungi	RecName: Full=Ras-like protein 1; Flags: Precursor [Pyricularia oryzae 70-15]	Ras family
MDBOrad1_01015	2EWVH@1|root,2SYM8@2759|Eukaryota,3ASKQ@33154|Opisthokonta,3PI14@4751|Fungi,3V6XB@5204|Basidiomycota,22BB2@155619|Agaricomycetes,3W8F4@5338|Agaricales	3PI14@4751|Fungi
MDBOrad1_01016	29IS1@1|root,2RRZT@2759|Eukaryota,38HKR@33154|Opisthokonta,3P05P@4751|Fungi,3V7CZ@5204|Basidiomycota,22FF4@155619|Agaricomycetes,3W4S8@5338|Agaricales	3P05P@4751|Fungi	RecName: Full=UPF0658 Golgi apparatus membrane protein C23H3.04 [Schizosaccharomyces pombe 972h-]			5
MDBOrad1_01017	COG1990@1|root,KOG3282@2759|Eukaryota,3A5QT@33154|Opisthokonta,3P45V@4751|Fungi,3V61F@5204|Basidiomycota,22AH1@155619|Agaricomycetes,3W816@5338|Agaricales	3P45V@4751|Fungi	RecName: Full=Peptidyl-tRNA hydrolase 2, mitochondrial; Short=PTH 2; AltName: Full=Bcl-2 inhibitor of transcription; Flags: Precursor [Bos taurus]	Peptidyl-tRNA hydrolase PTH2		1
MDBOrad1_01018	2E7XP@1|root,2SEFT@2759|Eukaryota,3ABST@33154|Opisthokonta,3P969@4751|Fungi,3V2YG@5204|Basidiomycota,229EG@155619|Agaricomycetes,3H52K@355688|Agaricomycetes incertae sedis	3P969@4751|Fungi
MDBOrad1_01019	COG0517@1|root,2QVK2@2759|Eukaryota,39AEJ@33154|Opisthokonta,3NVCH@4751|Fungi,3UZG8@5204|Basidiomycota,225XY@155619|Agaricomycetes,3W56D@5338|Agaricales	3NVCH@4751|Fungi	RecName: Full=CBS domain-containing protein CBSCBSPB5 [Arabidopsis thaliana]_x0001_Q0WLC7.2 RecName: Full=CBS domain-containing protein CBSCBSPB4 [Arabidopsis thaliana]	CBS domain		1
MDBOrad1_01020	KOG4002@1|root,KOG4002@2759|Eukaryota,39RF2@33154|Opisthokonta,3P07M@4751|Fungi,3V0KD@5204|Basidiomycota,226VQ@155619|Agaricomycetes,3W4KB@5338|Agaricales	3P07M@4751|Fungi	RecName: Full=Tetra-spanning protein 1 [Schizosaccharomyces pombe 972h-]	Transmembrane protein 33/Nucleoporin POM33		3
MDBOrad1_01021	COG0513@1|root,KOG0342@2759|Eukaryota,38D7H@33154|Opisthokonta,3NUXT@4751|Fungi,3UZS5@5204|Basidiomycota,2284T@155619|Agaricomycetes,3H3RE@355688|Agaricomycetes incertae sedis	3NUXT@4751|Fungi	RecName: Full=ATP-dependent RNA helicase HAS1 [Ustilago maydis 521]	DEAD/DEAH box helicase
MDBOrad1_01022					SP(Sec/SPI)	1
MDBOrad1_01023	KOG1944@1|root,KOG1944@2759|Eukaryota,39UCU@33154|Opisthokonta,3NWPZ@4751|Fungi,3V4W0@5204|Basidiomycota,22E98@155619|Agaricomycetes	3NWPZ@4751|Fungi		Mpv17 / PMP22 family		2
MDBOrad1_01024	2EMA6@1|root,2SR06@2759|Eukaryota,3ANF6@33154|Opisthokonta,3PEX1@4751|Fungi,3V612@5204|Basidiomycota,22AFA@155619|Agaricomycetes,3W7YF@5338|Agaricales	3PEX1@4751|Fungi
MDBOrad1_01025	29VN4@1|root,2RXMH@2759|Eukaryota,38F6S@33154|Opisthokonta,3P1XW@4751|Fungi,3V093@5204|Basidiomycota,228DM@155619|Agaricomycetes,3W60Y@5338|Agaricales	3P1XW@4751|Fungi	RecName: Full=Peroxisomal membrane protein 4 [Bos taurus]	Tim17/Tim22/Tim23/Pmp24 family
MDBOrad1_01026	2D2ZD@1|root,2SPMN@2759|Eukaryota,3AMQD@33154|Opisthokonta,3PBXU@4751|Fungi,3V3U5@5204|Basidiomycota,2265I@155619|Agaricomycetes,3H2HT@355688|Agaricomycetes incertae sedis	3PBXU@4751|Fungi	RecName: Full=Chromo domain-containing protein 2 [Schizosaccharomyces pombe 972h-]	Chromo (CHRromatin Organisation MOdifier) domain
MDBOrad1_01027	28MKT@1|root,2QU4J@2759|Eukaryota,39C6U@33154|Opisthokonta,3P0EY@4751|Fungi,3UY7B@5204|Basidiomycota,22533@155619|Agaricomycetes,3W63H@5338|Agaricales	3P0EY@4751|Fungi	RecName: Full=Maintenance of telomere capping protein 1 [Schizosaccharomyces pombe 972h-]	Family of unknown function (DUF5427)
MDBOrad1_01028	COG0852@1|root,KOG1713@2759|Eukaryota,38BAK@33154|Opisthokonta,3NVZQ@4751|Fungi,3UYB9@5204|Basidiomycota,228JS@155619|Agaricomycetes,3W4JD@5338|Agaricales	3NVZQ@4751|Fungi	RecName: Full=Probable NADH-ubiquinone oxidoreductase 30.4 kDa subunit, mitochondrial; AltName: Full=Alkane-inducible protein 1; AltName: Full=CI-31kD; AltName: Full=Complex I-30kD; Flags: Precursor [Candida maltosa]	Respiratory-chain NADH dehydrogenase, 30 Kd subunit
MDBOrad1_01029	KOG3096@1|root,KOG3096@2759|Eukaryota,38G61@33154|Opisthokonta,3P4VU@4751|Fungi,3V14N@5204|Basidiomycota,227RI@155619|Agaricomycetes,3W3YD@5338|Agaricales	3P4VU@4751|Fungi		Breast carcinoma amplified sequence 2 (BCAS2)
MDBOrad1_01030	2CZ28@1|root,2S7Z8@2759|Eukaryota,3A8WX@33154|Opisthokonta,3P7YY@4751|Fungi,3V2JD@5204|Basidiomycota,22E8H@155619|Agaricomycetes,3W9VC@5338|Agaricales	3P7YY@4751|Fungi
MDBOrad1_01031	COG0045@1|root,KOG2799@2759|Eukaryota,38D0K@33154|Opisthokonta,3NUY0@4751|Fungi,3UYBH@5204|Basidiomycota,226PV@155619|Agaricomycetes,3H4A4@355688|Agaricomycetes incertae sedis	3NUY0@4751|Fungi	RecName: Full=Succinate--CoA ligase [ADP-forming] subunit beta, hydrogenosomal; AltName: Full=Succinyl-CoA synthetase beta chain; Short=SCS-beta; Flags: Precursor [Neocallimastix frontalis]	ATP-grasp domain
MDBOrad1_01032	2CYBX@1|root,2S3G2@2759|Eukaryota,3A400@33154|Opisthokonta,3P4QR@4751|Fungi,3V1I3@5204|Basidiomycota,225BA@155619|Agaricomycetes,3W6FI@5338|Agaricales	3P4QR@4751|Fungi
MDBOrad1_01033	COG0123@1|root,KOG1342@2759|Eukaryota,38BIK@33154|Opisthokonta,3NVD7@4751|Fungi,3UXYH@5204|Basidiomycota,224B9@155619|Agaricomycetes,3W57P@5338|Agaricales	3NVD7@4751|Fungi	RecName: Full=Histone deacetylase HDAC1; Short=HD [Drosophila melanogaster]	Histone deacetylase domain
MDBOrad1_01034	COG5145@1|root,KOG4017@2759|Eukaryota,39FN8@33154|Opisthokonta,3NYT9@4751|Fungi,3V0I1@5204|Basidiomycota,226GJ@155619|Agaricomycetes,3W368@5338|Agaricales	3NYT9@4751|Fungi	RecName: Full=DNA repair protein rad14; AltName: Full=XP-A family homolog rhp14 [Schizosaccharomyces pombe 972h-]	XPA protein C-terminus	SP(Sec/SPI)		yes
MDBOrad1_01035	COG1946@1|root,KOG3016@2759|Eukaryota,38GG7@33154|Opisthokonta,3NXST@4751|Fungi,3V0C6@5204|Basidiomycota,225ZC@155619|Agaricomycetes,3W46T@5338|Agaricales	3NXST@4751|Fungi	RecName: Full=Acyl-coenzyme A thioesterase 8; Short=Acyl-CoA thioesterase 8; AltName: Full=Choloyl-coenzyme A thioesterase; AltName: Full=Peroxisomal acyl-CoA thioesterase 2; Short=PTE-2; AltName: Full=Peroxisomal acyl-coenzyme A thioester hydrolase 1; Short=PTE-1; AltName: Full=Peroxisomal long-chain acyl-CoA thioesterase 1 [Mus musculus]	Thioesterase-like superfamily
MDBOrad1_01036	COG2214@1|root,KOG0691@2759|Eukaryota,38H5J@33154|Opisthokonta,3P5MD@4751|Fungi,3V1QB@5204|Basidiomycota,225EZ@155619|Agaricomycetes,3W6M7@5338|Agaricales	3P5MD@4751|Fungi	RecName: Full=Pre-mRNA-splicing factor cwf23; AltName: Full=Complexed with cdc5 protein 23 [Schizosaccharomyces pombe 972h-]	DnaJ domain
MDBOrad1_01037	2DP2Q@1|root,2S68K@2759|Eukaryota,39KKG@33154|Opisthokonta,3Q4ZR@4751|Fungi,3V202@5204|Basidiomycota,224BT@155619|Agaricomycetes	3Q4ZR@4751|Fungi	RecName: Full=Uncharacterized protein C18G6.01c [Schizosaccharomyces pombe 972h-]	Chalcone isomerase like	SP(Sec/SPI)		yes
MDBOrad1_01038	KOG1851@1|root,KOG1851@2759|Eukaryota,38EI6@33154|Opisthokonta,3NWBP@4751|Fungi,3V3AS@5204|Basidiomycota,2289J@155619|Agaricomycetes,3H0SG@355688|Agaricomycetes incertae sedis	3NWBP@4751|Fungi	RecName: Full=Proteasome activator complex subunit 4A; AltName: Full=Proteasome activator PA200-A [Danio rerio]	Proteasome-substrate-size regulator, mid region
MDBOrad1_01039	COG5063@1|root,KOG1677@2759|Eukaryota,3A9K1@33154|Opisthokonta,3P72E@4751|Fungi,3V1M7@5204|Basidiomycota,226QS@155619|Agaricomycetes,3W4F9@5338|Agaricales	3P72E@4751|Fungi	RecName: Full=mRNA decay activator protein ZFP36; AltName: Full=Tristetraprolin; Short=TTP; AltName: Full=Zinc finger protein 36; Short=Zfp-36 [Bos taurus]	Zinc finger C-x8-C-x5-C-x3-H type (and similar)
MDBOrad1_01040	COG0510@1|root,KOG2686@2759|Eukaryota,38HR7@33154|Opisthokonta,3NW1Y@4751|Fungi,3UY9V@5204|Basidiomycota,2267S@155619|Agaricomycetes,3W3TU@5338|Agaricales	3NW1Y@4751|Fungi	RecName: Full=Choline kinase; AltName: Full=ATP:choline phosphotransferase [Schizosaccharomyces pombe 972h-]	Choline/ethanolamine kinase
MDBOrad1_01041	KOG0254@1|root,KOG0254@2759|Eukaryota,3AJ1W@33154|Opisthokonta,3PBX2@4751|Fungi,3V3B2@5204|Basidiomycota,225YF@155619|Agaricomycetes,3W4B9@5338|Agaricales	3PBX2@4751|Fungi	RecName: Full=Efflux pump dotC; AltName: Full=Dothistromin biosynthesis protein C [Dothistroma septosporum]	Major Facilitator Superfamily		12
MDBOrad1_01042	COG0484@1|root,KOG0715@2759|Eukaryota,38H0N@33154|Opisthokonta,3NUEY@4751|Fungi,3UYBA@5204|Basidiomycota,226MN@155619|Agaricomycetes,3W44Z@5338|Agaricales	3NUEY@4751|Fungi	RecName: Full=DnaJ homolog 1, mitochondrial; Flags: Precursor [Aspergillus nidulans FGSC A4]	DnaJ C terminal domain
MDBOrad1_01043	KOG0668@1|root,KOG0668@2759|Eukaryota,38B6E@33154|Opisthokonta,3NWKT@4751|Fungi,3UYUY@5204|Basidiomycota,22703@155619|Agaricomycetes,3W5DM@5338|Agaricales	3NWKT@4751|Fungi	RecName: Full=Casein kinase II subunit alpha; Short=CK II subunit alpha [Neurospora crassa OR74A]	Protein kinase domain
MDBOrad1_01044	KOG4701@1|root,KOG4701@2759|Eukaryota,38GWD@33154|Opisthokonta,3NVBP@4751|Fungi,3V4YV@5204|Basidiomycota,225N0@155619|Agaricomycetes,3W3SI@5338|Agaricales	3NVBP@4751|Fungi	RecName: Full=Chitinase 1; Flags: Precursor [Rhizopus microsporus var. oligosporus]	Glycosyl hydrolases family 18
MDBOrad1_01045	KOG4373@1|root,KOG4373@2759|Eukaryota,39TNK@33154|Opisthokonta,3NXUW@4751|Fungi,3V4XE@5204|Basidiomycota,2290N@155619|Agaricomycetes,3W6YI@5338|Agaricales	3NXUW@4751|Fungi	RecName: Full=Werner syndrome ATP-dependent helicase; AltName: Full=DNA helicase, RecQ-like type 3; Short=RecQ3; AltName: Full=Exonuclease WRN; AltName: Full=RecQ protein-like 2 [Homo sapiens]	3'-5' exonuclease
MDBOrad1_01046	2EAUV@1|root,2SH1G@2759|Eukaryota,3ACJR@33154|Opisthokonta,3P9FD@4751|Fungi,3V37N@5204|Basidiomycota,22ATK@155619|Agaricomycetes	3P9FD@4751|Fungi
MDBOrad1_01047	2E87V@1|root,2SER1@2759|Eukaryota,3A8I2@33154|Opisthokonta,3P8CI@4751|Fungi,3V2PG@5204|Basidiomycota,2299J@155619|Agaricomycetes	3P8CI@4751|Fungi		BTG family
MDBOrad1_01048	COG0502@1|root,KOG2900@2759|Eukaryota,38ESN@33154|Opisthokonta,3NVE4@4751|Fungi,3UXZR@5204|Basidiomycota,224ME@155619|Agaricomycetes,3W50I@5338|Agaricales	3NVE4@4751|Fungi	RecName: Full=Biotin synthase, mitochondrial; Flags: Precursor [Aspergillus nidulans FGSC A4]	Biotin and Thiamin Synthesis associated domain
MDBOrad1_01049	2E8AD@1|root,2SETC@2759|Eukaryota,3ADMR@33154|Opisthokonta,3P9V0@4751|Fungi,3V2WA@5204|Basidiomycota,226KR@155619|Agaricomycetes,3W65B@5338|Agaricales	3P9V0@4751|Fungi
MDBOrad1_01050	KOG2406@1|root,KOG2406@2759|Eukaryota,38H0J@33154|Opisthokonta,3NYJE@4751|Fungi,3UXV7@5204|Basidiomycota,227UJ@155619|Agaricomycetes,3H28W@355688|Agaricomycetes incertae sedis	3NYJE@4751|Fungi	RecName: Full=Protein ecdysoneless [Drosophila melanogaster]	SGT1 protein
MDBOrad1_01051	COG1436@1|root,KOG3432@2759|Eukaryota,3A3I9@33154|Opisthokonta,3P3TN@4751|Fungi,3V15X@5204|Basidiomycota,229C3@155619|Agaricomycetes,3H53Y@355688|Agaricomycetes incertae sedis	3P3TN@4751|Fungi	RecName: Full=V-type proton ATPase subunit F; Short=V-ATPase subunit F; AltName: Full=V-ATPase 14 kDa subunit; AltName: Full=Vacuolar proton pump subunit F [Aspergillus fischeri NRRL 181]	ATP synthase (F/14-kDa) subunit
MDBOrad1_01052	2CZ2A@1|root,2S7ZJ@2759|Eukaryota,3A7WF@33154|Opisthokonta,3P9X5@4751|Fungi,3V1TI@5204|Basidiomycota,2289D@155619|Agaricomycetes	3P9X5@4751|Fungi		TIM21		1
MDBOrad1_01053	COG2036@1|root,KOG1745@2759|Eukaryota,39ZTV@33154|Opisthokonta,3P1RT@4751|Fungi,3V4ZY@5204|Basidiomycota,228WQ@155619|Agaricomycetes,3W70Y@5338|Agaricales	3P1RT@4751|Fungi	RecName: Full=Histone H3.2 [Ustilago maydis 521]	Core histone H2A/H2B/H3/H4
MDBOrad1_01054	COG0179@1|root,KOG1535@2759|Eukaryota,38DXI@33154|Opisthokonta,3Q30A@4751|Fungi,3V0K3@5204|Basidiomycota,22F6S@155619|Agaricomycetes,3H49Q@355688|Agaricomycetes incertae sedis	3Q30A@4751|Fungi	RecName: Full=Fumarylacetoacetate hydrolase domain-containing protein 2 [Xenopus laevis]	Fumarylacetoacetate (FAA) hydrolase family	SP(Sec/SPI)		yes
MDBOrad1_01055	2EUBZ@1|root,2SWI7@2759|Eukaryota,3AVXX@33154|Opisthokonta,3PIGZ@4751|Fungi,3V76R@5204|Basidiomycota,22AW1@155619|Agaricomycetes,3W85R@5338|Agaricales	3PIGZ@4751|Fungi
MDBOrad1_01056	COG2178@1|root,KOG3066@2759|Eukaryota,38GEP@33154|Opisthokonta,3P22K@4751|Fungi,3V1DA@5204|Basidiomycota,226QD@155619|Agaricomycetes,3W7CZ@5338|Agaricales	3P22K@4751|Fungi	RecName: Full=Translin-associated protein X; AltName: Full=Translin-associated factor X [Rattus norvegicus]	Translin family
MDBOrad1_01057	2D6D4@1|root,2S56T@2759|Eukaryota,3A85S@33154|Opisthokonta,3P5K3@4751|Fungi,3V1YB@5204|Basidiomycota,225MH@155619|Agaricomycetes,3W71B@5338|Agaricales	3P5K3@4751|Fungi
MDBOrad1_01058	KOG1851@1|root,KOG1851@2759|Eukaryota,38EI6@33154|Opisthokonta,3NWBP@4751|Fungi,3UZQ6@5204|Basidiomycota,225W0@155619|Agaricomycetes,3W2ZR@5338|Agaricales	3NWBP@4751|Fungi	RecName: Full=Proteasome activator complex subunit 4; AltName: Full=Proteasome activator PA200 [Homo sapiens]	Proteasome-substrate-size regulator, mid region
MDBOrad1_01059	COG5030@1|root,KOG0936@2759|Eukaryota,38T6J@33154|Opisthokonta,3P0ZV@4751|Fungi,3V187@5204|Basidiomycota,228EX@155619|Agaricomycetes	3P0ZV@4751|Fungi	RecName: Full=AP-3 complex subunit sigma; AltName: Full=AP-3 complex sigma3A subunit; AltName: Full=Adaptor-related protein complex 3 subunit sigma; AltName: Full=Clathrin-associated/assembly/adaptor protein, small 3; AltName: Full=Sigma-adaptin 3A; AltName: Full=Sigma3-adaptin [Schizosaccharomyces pombe 972h-]	Clathrin adaptor complex small chain
MDBOrad1_01060	COG5097@1|root,KOG3169@2759|Eukaryota,39SM4@33154|Opisthokonta,3P0AP@4751|Fungi,3V1SW@5204|Basidiomycota,224J6@155619|Agaricomycetes,3W6UX@5338|Agaricales	3P0AP@4751|Fungi	RecName: Full=Mediator of RNA polymerase II transcription subunit 6; AltName: Full=Mediator complex subunit 6 [Ustilago maydis 521]	MED6 mediator sub complex component
MDBOrad1_01061	COG1914@1|root,KOG1291@2759|Eukaryota,38C14@33154|Opisthokonta,3NUWM@4751|Fungi,3UYAY@5204|Basidiomycota,226D9@155619|Agaricomycetes,3W3ZT@5338|Agaricales	3NUWM@4751|Fungi	RecName: Full=Iron transporter SMF3 [Saccharomyces cerevisiae S288C]	Natural resistance-associated macrophage protein		11
MDBOrad1_01062	KOG1721@1|root,KOG1721@2759|Eukaryota,3A93P@33154|Opisthokonta,3P790@4751|Fungi,3V27H@5204|Basidiomycota,228TS@155619|Agaricomycetes	3P790@4751|Fungi		Zinc finger, C2H2 type
MDBOrad1_01063	COG1241@1|root,KOG0481@2759|Eukaryota,38CHZ@33154|Opisthokonta,3NUIB@4751|Fungi,3UZI6@5204|Basidiomycota,227Y3@155619|Agaricomycetes,3H09X@355688|Agaricomycetes incertae sedis	3NUIB@4751|Fungi	RecName: Full=DNA replication licensing factor mcm5; AltName: Full=Cell division control protein nda4; AltName: Full=Minichromosome maintenance protein 5 [Schizosaccharomyces pombe 972h-]	MCM P-loop domain
MDBOrad1_01064	2EAUV@1|root,2SH1G@2759|Eukaryota,3ACJR@33154|Opisthokonta,3P9FD@4751|Fungi,3V37N@5204|Basidiomycota,22ATK@155619|Agaricomycetes	3P9FD@4751|Fungi
MDBOrad1_01065	COG1310@1|root,KOG3050@2759|Eukaryota,38DQP@33154|Opisthokonta,3NW2Z@4751|Fungi,3V0AA@5204|Basidiomycota,2283U@155619|Agaricomycetes,3W50J@5338|Agaricales	3NW2Z@4751|Fungi	RecName: Full=COP9 signalosome complex subunit 6; Short=Dch6; Short=Signalosome subunit 6 [Drosophila melanogaster]	Maintenance of mitochondrial structure and function
MDBOrad1_01066	28VCW@1|root,2R24D@2759|Eukaryota,38IHI@33154|Opisthokonta,3PKEG@4751|Fungi,3VA1I@5204|Basidiomycota,22DF3@155619|Agaricomycetes,3W96A@5338|Agaricales	3PKEG@4751|Fungi
MDBOrad1_01067	COG0323@1|root,KOG1978@2759|Eukaryota,38E9K@33154|Opisthokonta,3NV9D@4751|Fungi,3UZWW@5204|Basidiomycota,224VT@155619|Agaricomycetes,3W5KA@5338|Agaricales	3NV9D@4751|Fungi	RecName: Full=DNA mismatch repair protein PMS1; AltName: Full=Postmeiotic segregation protein 1 [Saccharomyces cerevisiae S288C]	MutL C terminal dimerisation domain
MDBOrad1_01068	COG0249@1|root,KOG0219@2759|Eukaryota,38BNJ@33154|Opisthokonta,3NVGK@4751|Fungi,3UZV4@5204|Basidiomycota,225QG@155619|Agaricomycetes,3W4NN@5338|Agaricales	3NVGK@4751|Fungi	RecName: Full=DNA mismatch repair protein msh-2 [Neurospora crassa OR74A]	MutS domain V
MDBOrad1_01069	KOG2171@1|root,KOG2171@2759|Eukaryota,38EQR@33154|Opisthokonta,3NUCV@4751|Fungi,3UYVX@5204|Basidiomycota,227A2@155619|Agaricomycetes,3H42J@355688|Agaricomycetes incertae sedis	3NUCV@4751|Fungi	RecName: Full=Importin subunit beta-3; AltName: Full=Karyopherin subunit beta-3; AltName: Full=Karyopherin-121; AltName: Full=Protein secretion enhancer 1 [Saccharomyces cerevisiae S288C]	HEAT-like repeat
MDBOrad1_01070	KOG1290@1|root,KOG1290@2759|Eukaryota,3AJ9I@33154|Opisthokonta,3PBUE@4751|Fungi,3V50F@5204|Basidiomycota,228F4@155619|Agaricomycetes,3W436@5338|Agaricales	3PBUE@4751|Fungi	RecName: Full=Protein kinase dsk1; AltName: Full=Dis1-suppressing protein kinase [Schizosaccharomyces pombe 972h-]	Protein kinase domain
MDBOrad1_01071	KOG0582@1|root,KOG0582@2759|Eukaryota,38BXD@33154|Opisthokonta,3NUP0@4751|Fungi,3UZ1K@5204|Basidiomycota,2258E@155619|Agaricomycetes,3W6CV@5338|Agaricales	3NUP0@4751|Fungi	RecName: Full=Serine/threonine-protein kinase fray2; AltName: Full=STE20-like kinase fray2 [Dictyostelium discoideum]	Protein kinase domain
MDBOrad1_01072	COG0726@1|root,2QRIP@2759|Eukaryota,39UFN@33154|Opisthokonta,3NWJ2@4751|Fungi,3UXVS@5204|Basidiomycota,226MS@155619|Agaricomycetes,3H1R8@355688|Agaricomycetes incertae sedis	3NWJ2@4751|Fungi	RecName: Full=Chitin deacetylase 1; Flags: Precursor [Cryptococcus neoformans var. grubii H99]	Polysaccharide deacetylase	SP(Sec/SPI)		yes
MDBOrad1_01073	KOG1508@1|root,KOG1508@2759|Eukaryota,38BTK@33154|Opisthokonta,3P5P0@4751|Fungi,3V1N2@5204|Basidiomycota,225N3@155619|Agaricomycetes,3W70W@5338|Agaricales	3P5P0@4751|Fungi		Nucleosome assembly protein (NAP)
MDBOrad1_01074	KOG4645@1|root,KOG4645@2759|Eukaryota,38BG6@33154|Opisthokonta,3NVEY@4751|Fungi,3UYC7@5204|Basidiomycota,225JT@155619|Agaricomycetes,3W33S@5338|Agaricales	3NVEY@4751|Fungi	RecName: Full=Cytochrome c oxidase assembly protein COX19 [Ustilago maydis 521]
MDBOrad1_01075	2CMAH@1|root,2QPT2@2759|Eukaryota,39ZGB@33154|Opisthokonta,3P14E@4751|Fungi,3UZKF@5204|Basidiomycota,2267C@155619|Agaricomycetes,3H32W@355688|Agaricomycetes incertae sedis	3P14E@4751|Fungi	RecName: Full=Glycerophosphodiester phosphodiesterase; Short=Glycerophosphoryl diester phosphodiesterase [Bacillus subtilis subsp. subtilis str. 168]	Glycerophosphoryl diester phosphodiesterase family
MDBOrad1_01076	COG0723@1|root,KOG1671@2759|Eukaryota,38FY0@33154|Opisthokonta,3NV7A@4751|Fungi,3UY03@5204|Basidiomycota,225N5@155619|Agaricomycetes,3W5W7@5338|Agaricales	3NV7A@4751|Fungi	RecName: Full=Cytochrome b-c1 complex subunit Rieske, mitochondrial; AltName: Full=Complex III subunit 5; AltName: Full=Rieske iron-sulfur protein; Short=RISP; AltName: Full=Ubiquinol-cytochrome c reductase iron-sulfur subunit; Flags: Precursor [Schizosaccharomyces pombe 972h-]
MDBOrad1_01077	COG0477@1|root,KOG2533@2759|Eukaryota,39VSQ@33154|Opisthokonta,3NU6K@4751|Fungi	3NU6K@4751|Fungi	RecName: Full=Pantothenate transporter FEN2; AltName: Full=Fenpropimorph resistance protein 2 [Saccharomyces cerevisiae S288C]	Major Facilitator Superfamily		10
MDBOrad1_01078	COG1012@1|root,KOG2451@2759|Eukaryota,38D8C@33154|Opisthokonta,3NVW2@4751|Fungi,3UXZS@5204|Basidiomycota,2251E@155619|Agaricomycetes,3W3D4@5338|Agaricales	3NVW2@4751|Fungi	RecName: Full=Glutarate-semialdehyde dehydrogenase [Pseudomonas aeruginosa PAO1]	Aldehyde dehydrogenase family
MDBOrad1_01079	KOG2886@1|root,KOG2886@2759|Eukaryota,3A36F@33154|Opisthokonta,3P3JE@4751|Fungi,3V2FM@5204|Basidiomycota,229IR@155619|Agaricomycetes,3W72C@5338|Agaricales	3P3JE@4751|Fungi		Domain of unknown function (DUF4149)		4
MDBOrad1_01080	COG4886@1|root,KOG1644@2759|Eukaryota,38E9Y@33154|Opisthokonta,3NUHE@4751|Fungi,3V0PQ@5204|Basidiomycota,2250X@155619|Agaricomycetes	3NUHE@4751|Fungi	RecName: Full=U2 small nuclear ribonucleoprotein A'; Short=U2 snRNP A' [Aspergillus fumigatus Af293]	Leucine-rich repeat
MDBOrad1_01081	COG5329@1|root,KOG1889@2759|Eukaryota,38DI4@33154|Opisthokonta,3NUMD@4751|Fungi,3UYH6@5204|Basidiomycota,2255U@155619|Agaricomycetes,3W3KP@5338|Agaricales	3NUMD@4751|Fungi	RecName: Full=Phosphatidylinositol-3-phosphatase SAC1; AltName: Full=Phosphatidylinositol-4-phosphate phosphatase; AltName: Full=Recessive suppressor of secretory defect [Saccharomyces cerevisiae S288C]	SacI homology domain		2
MDBOrad1_01082	2E0J9@1|root,2SFHZ@2759|Eukaryota,3ACIS@33154|Opisthokonta,3P9MY@4751|Fungi,3V641@5204|Basidiomycota,22AYQ@155619|Agaricomycetes	3P9MY@4751|Fungi		Basic region leucine zipper
MDBOrad1_01083	COG5100@1|root,KOG2834@2759|Eukaryota,38CMA@33154|Opisthokonta,3NU81@4751|Fungi,3UYPI@5204|Basidiomycota,227ZU@155619|Agaricomycetes,3W4NB@5338|Agaricales	3NU81@4751|Fungi	RecName: Full=Nuclear protein localization protein 4 [Cryptococcus neoformans var. neoformans JEC21]	NPL4 family
MDBOrad1_01084	29W2B@1|root,2RXNF@2759|Eukaryota,3A0G1@33154|Opisthokonta,3P1ZK@4751|Fungi,3V1W4@5204|Basidiomycota,22908@155619|Agaricomycetes,3H4SU@355688|Agaricomycetes incertae sedis	3P1ZK@4751|Fungi		WW domain
MDBOrad1_01085	COG0321@1|root,KOG0325@2759|Eukaryota,39TS9@33154|Opisthokonta,3NYXN@4751|Fungi,3V16B@5204|Basidiomycota,2253B@155619|Agaricomycetes,3W42M@5338|Agaricales	3NYXN@4751|Fungi	RecName: Full=Putative lipoyltransferase 2, mitochondrial; AltName: Full=Lipoate-protein ligase B; AltName: Full=Lipoyl/octanoyl transferase; AltName: Full=Octanoyl-[acyl-carrier-protein]-protein N-octanoyltransferase; Flags: Precursor [Danio rerio]
MDBOrad1_01086	2D3GQ@1|root,2SRHI@2759|Eukaryota,3A8UI@33154|Opisthokonta,3P817@4751|Fungi,3VC0W@5204|Basidiomycota,22F40@155619|Agaricomycetes,3W978@5338|Agaricales	3P817@4751|Fungi		NAD(P)H-binding
MDBOrad1_01087
MDBOrad1_01088
MDBOrad1_01089
MDBOrad1_01090	COG1877@1|root,KOG1050@2759|Eukaryota,38CEK@33154|Opisthokonta,3NU3V@4751|Fungi,3V3VG@5204|Basidiomycota,224JE@155619|Agaricomycetes,3H0HD@355688|Agaricomycetes incertae sedis	3NU3V@4751|Fungi	RecName: Full=Alpha,alpha-trehalose-phosphate synthase [UDP-forming]; AltName: Full=Trehalose-6-phosphate synthase; AltName: Full=UDP-glucose-glucosephosphate glucosyltransferase [Ogataea angusta]	Glycosyltransferase family 20
MDBOrad1_01091
MDBOrad1_01092	KOG1121@1|root,KOG1121@2759|Eukaryota,39KU3@33154|Opisthokonta,3Q57D@4751|Fungi,3VCJY@5204|Basidiomycota,22C69@155619|Agaricomycetes,3W95N@5338|Agaricales	3Q57D@4751|Fungi		hAT family C-terminal dimerisation region		2
MDBOrad1_01093	2EBRF@1|root,2SHSB@2759|Eukaryota,3AII7@33154|Opisthokonta,3PB8V@4751|Fungi,3V43R@5204|Basidiomycota,224UP@155619|Agaricomycetes,3H3YV@355688|Agaricomycetes incertae sedis	3PB8V@4751|Fungi		Plavaka transposase
MDBOrad1_01094	KOG4585@1|root,KOG4585@2759|Eukaryota,3A49Z@33154|Opisthokonta,3P4KC@4751|Fungi	3P4KC@4751|Fungi
MDBOrad1_01095
MDBOrad1_01096
MDBOrad1_01097	2E2QM@1|root,2S9XI@2759|Eukaryota,3A75K@33154|Opisthokonta,3P5A9@4751|Fungi,3V5BQ@5204|Basidiomycota,229AI@155619|Agaricomycetes,3H50Y@355688|Agaricomycetes incertae sedis	3P5A9@4751|Fungi		NAD(P)H-binding
MDBOrad1_01098	COG5038@1|root,KOG1012@2759|Eukaryota,38DXC@33154|Opisthokonta,3NU87@4751|Fungi,3UYMZ@5204|Basidiomycota,224CS@155619|Agaricomycetes	3NU87@4751|Fungi		C2 domain
MDBOrad1_01099	COG2890@1|root,KOG3191@2759|Eukaryota,39XP3@33154|Opisthokonta,3NUJD@4751|Fungi,3V0UR@5204|Basidiomycota,228NN@155619|Agaricomycetes	3NUJD@4751|Fungi	RecName: Full=Methyltransferase N6AMT1; AltName: Full=HemK methyltransferase family member 2; AltName: Full=Lysine N-methyltransferase 9; AltName: Full=Methylarsonite methyltransferase N6AMT1; AltName: Full=Protein N(5)-glutamine methyltransferase [Mus musculus]	Methyltransferase small domain
MDBOrad1_01100	29HBG@1|root,2QSA3@2759|Eukaryota,39K9N@33154|Opisthokonta,3Q4ND@4751|Fungi,3V090@5204|Basidiomycota,224SX@155619|Agaricomycetes,3WA36@5338|Agaricales	3Q4ND@4751|Fungi	RecName: Full=ADP,ATP carrier protein; AltName: Full=ADP/ATP translocase; AltName: Full=Adenine nucleotide translocator; Short=ANT [Parachlorella kessleri]	Mitochondrial carrier protein
MDBOrad1_01101	COG5038@1|root,KOG1012@2759|Eukaryota,38DXC@33154|Opisthokonta,3NU87@4751|Fungi,3UYMZ@5204|Basidiomycota,224CS@155619|Agaricomycetes,3H1XQ@355688|Agaricomycetes incertae sedis	3NU87@4751|Fungi	RecName: Full=Uncharacterized protein PYUK71.03c [Schizosaccharomyces pombe 972h-]	C2 domain		2
MDBOrad1_01102	COG0494@1|root,KOG3069@2759|Eukaryota,39PG1@33154|Opisthokonta,3NWUH@4751|Fungi,3UZUX@5204|Basidiomycota,227A8@155619|Agaricomycetes,3W6CW@5338|Agaricales	3NWUH@4751|Fungi	RecName: Full=Mitochondrial coenzyme A diphosphatase NUDT8; AltName: Full=Nucleoside diphosphate-linked moiety X motif 8; Short=Nudix motif 8 [Mus musculus]			1
MDBOrad1_01103	2EX70@1|root,2SNGA@2759|Eukaryota,3AJPN@33154|Opisthokonta,3PDIF@4751|Fungi,3V5BF@5204|Basidiomycota,229ZT@155619|Agaricomycetes	3PDIF@4751|Fungi		Family of unknown function (DUF6699)
MDBOrad1_01104	2CGIW@1|root,2RP4Z@2759|Eukaryota,39VRZ@33154|Opisthokonta,3NY7S@4751|Fungi,3VBHT@5204|Basidiomycota,22ENX@155619|Agaricomycetes	3NY7S@4751|Fungi
MDBOrad1_01105	COG0412@1|root,KOG3043@2759|Eukaryota,38I4C@33154|Opisthokonta,3P0BQ@4751|Fungi,3V133@5204|Basidiomycota,2280K@155619|Agaricomycetes,3W354@5338|Agaricales	3P0BQ@4751|Fungi	RecName: Full=Uncharacterized AIM2 family protein C30D10.14 [Schizosaccharomyces pombe 972h-]	Dienelactone hydrolase family
MDBOrad1_01106	2EG3B@1|root,2SM4T@2759|Eukaryota,3AF96@33154|Opisthokonta,3PEYS@4751|Fungi,3V5W1@5204|Basidiomycota,22895@155619|Agaricomycetes,3W3YW@5338|Agaricales	3PEYS@4751|Fungi			SP(Sec/SPI)	8
MDBOrad1_01107	KOG1041@1|root,KOG1041@2759|Eukaryota,38CFV@33154|Opisthokonta,3NU0D@4751|Fungi,3V3P0@5204|Basidiomycota,224KZ@155619|Agaricomycetes	3NU0D@4751|Fungi	RecName: Full=Protein argonaute; AltName: Full=Cell cycle control protein ago1; AltName: Full=Eukaryotic translation initiation factor 2C 2-like protein ago1; AltName: Full=PAZ Piwi domain protein ago1; AltName: Full=Protein slicer; AltName: Full=RNA interference pathway protein ago1 [Schizosaccharomyces pombe 972h-]	Piwi domain
MDBOrad1_01108	COG2930@1|root,KOG1843@2759|Eukaryota,38FCU@33154|Opisthokonta,3NWAM@4751|Fungi,3UZZ8@5204|Basidiomycota,227MH@155619|Agaricomycetes,3W4CG@5338|Agaricales	3NWAM@4751|Fungi	RecName: Full=SH3 domain-containing protein PJ696.02 [Schizosaccharomyces pombe 972h-]	Las17-binding protein actin regulator
MDBOrad1_01109	COG0507@1|root,KOG0987@2759|Eukaryota,38G42@33154|Opisthokonta,3NTY9@4751|Fungi,3V4ZR@5204|Basidiomycota,2267X@155619|Agaricomycetes,3W902@5338|Agaricales	3NTY9@4751|Fungi	RecName: Full=ATP-dependent DNA helicase PIF1; AltName: Full=DNA repair and recombination helicase PIF1 [Aspergillus nidulans FGSC A4]	PIF1-like helicase
MDBOrad1_01110	KOG1450@1|root,KOG1450@2759|Eukaryota,39VWN@33154|Opisthokonta,3NZ3Q@4751|Fungi,3UY3S@5204|Basidiomycota,228M3@155619|Agaricomycetes,3W3NJ@5338|Agaricales	3NZ3Q@4751|Fungi	RecName: Full=Rho GTPase-activating protein 12; AltName: Full=Rho-type GTPase-activating protein 12 [Homo sapiens]	RhoGAP domain
MDBOrad1_01111	KOG0109@1|root,KOG0109@2759|Eukaryota,3A9WZ@33154|Opisthokonta,3P7NS@4751|Fungi,3V2DX@5204|Basidiomycota,224QC@155619|Agaricomycetes,3W2Z9@5338|Agaricales	3P7NS@4751|Fungi	RecName: Full=RNA-binding protein 4.1; AltName: Full=RNA-binding motif protein 4.1 [Danio rerio]	RNA recognition motif. (a.k.a. RRM, RBD, or RNP domain)
MDBOrad1_01112	28HEQ@1|root,2QPST@2759|Eukaryota,38D0H@33154|Opisthokonta,3NX0F@4751|Fungi,3UZR8@5204|Basidiomycota,225UN@155619|Agaricomycetes,3W3H1@5338|Agaricales	3NX0F@4751|Fungi	RecName: Full=1,3-beta-glucanosyltransferase gas1; Flags: Precursor [Schizosaccharomyces pombe 972h-]	Glucanosyltransferase	SP(Sec/SPI)	1
MDBOrad1_01113	2BQ41@1|root,2S1TA@2759|Eukaryota,3A58P@33154|Opisthokonta,3P4H2@4751|Fungi,3V1HE@5204|Basidiomycota,225KG@155619|Agaricomycetes,3H2TT@355688|Agaricomycetes incertae sedis	3P4H2@4751|Fungi		SUR7/PalI family		3
MDBOrad1_01114	KOG1192@1|root,KOG1192@2759|Eukaryota,38DU9@33154|Opisthokonta,3NV9G@4751|Fungi,3UYCU@5204|Basidiomycota,227QI@155619|Agaricomycetes,3W59Q@5338|Agaricales	3NV9G@4751|Fungi	RecName: Full=Sterol 3-beta-glucosyltransferase; AltName: Full=Autophagy-related protein 26 [Cryptococcus neoformans var. neoformans JEC21]	Glycosyltransferase family 28 N-terminal domain
MDBOrad1_01115	28J4J@1|root,2QRGK@2759|Eukaryota,38GHV@33154|Opisthokonta,3NVV6@4751|Fungi,3VC1X@5204|Basidiomycota,225DZ@155619|Agaricomycetes,3H2PF@355688|Agaricomycetes incertae sedis	3NVV6@4751|Fungi		non-haem dioxygenase in morphine synthesis N-terminal
MDBOrad1_01116	COG1235@1|root,2QWBK@2759|Eukaryota,39ZXT@33154|Opisthokonta,3P23E@4751|Fungi,3V07U@5204|Basidiomycota,227JG@155619|Agaricomycetes,3W4YV@5338|Agaricales	3P23E@4751|Fungi	RecName: Full=Putative hydrolase C777.06c [Schizosaccharomyces pombe 972h-]	Beta-lactamase superfamily domain
MDBOrad1_01117	KOG2006@1|root,KOG2006@2759|Eukaryota,38CMQ@33154|Opisthokonta,3NWUQ@4751|Fungi,3UZNK@5204|Basidiomycota,2270Q@155619|Agaricomycetes,3W6AF@5338|Agaricales	3NWUQ@4751|Fungi	RecName: Full=Guanine nucleotide exchange factor subunit Rich; AltName: Full=Protein RIC1 homolog [Drosophila melanogaster]	RIC1
MDBOrad1_01118	KOG3337@1|root,KOG3337@2759|Eukaryota,38FY3@33154|Opisthokonta,3P1UB@4751|Fungi,3V205@5204|Basidiomycota,22909@155619|Agaricomycetes,3W5C1@5338|Agaricales	3P1UB@4751|Fungi	RecName: Full=PRELI domain-containing protein 1, mitochondrial; AltName: Full=25 kDa protein of relevant evolutionary and lymphoid interest; AltName: Full=Px19-like protein; Flags: Precursor [Homo sapiens]	PRELI-like family
MDBOrad1_01119	COG1163@1|root,KOG1486@2759|Eukaryota,39QXU@33154|Opisthokonta,3NU94@4751|Fungi,3UXYV@5204|Basidiomycota,226VG@155619|Agaricomycetes	3NU94@4751|Fungi	RecName: Full=Developmentally-regulated GTP-binding protein 2; Short=DRG-2; AltName: Full=Translation factor GTPase DRG2; Short=TRAFAC GTPase DRG2 [Bos taurus]	C-terminal region of MMR_HSR1 domain
MDBOrad1_01120	KOG4645@1|root,KOG4645@2759|Eukaryota,38BG6@33154|Opisthokonta,3NVEY@4751|Fungi,3UYC7@5204|Basidiomycota,225JT@155619|Agaricomycetes,3W33S@5338|Agaricales	3NVEY@4751|Fungi	RecName: Full=MAP kinase kinase kinase wis4; AltName: Full=MAP kinase kinase kinase wak1; AltName: Full=MAP kinase kinase kinase wik1 [Schizosaccharomyces pombe 972h-]	Protein kinase domain
MDBOrad1_01121	28N75@1|root,2QUSF@2759|Eukaryota,3A77U@33154|Opisthokonta,3P5YA@4751|Fungi,3V42C@5204|Basidiomycota,228Y1@155619|Agaricomycetes,3W6GE@5338|Agaricales	3P5YA@4751|Fungi		5' nucleotidase, deoxy (Pyrimidine), cytosolic type C protein (NT5C)
MDBOrad1_01122	COG4178@1|root,KOG0064@2759|Eukaryota,38B9E@33154|Opisthokonta,3NW82@4751|Fungi,3UXU6@5204|Basidiomycota,225AC@155619|Agaricomycetes,3W4DA@5338|Agaricales	3NW82@4751|Fungi	RecName: Full=ATP-binding cassette sub-family D member 1; AltName: Full=Adrenoleukodystrophy protein; Short=ALDP [Danio rerio]	ABC transporter transmembrane region 2
MDBOrad1_01123	2CY3F@1|root,2S1RV@2759|Eukaryota,3A4C6@33154|Opisthokonta,3P4Z5@4751|Fungi,3V17N@5204|Basidiomycota,2289X@155619|Agaricomycetes,3W3M9@5338|Agaricales	3P4Z5@4751|Fungi		Family of unknown function (DUF6581)
MDBOrad1_01124	2DMSM@1|root,2S65M@2759|Eukaryota,3A80W@33154|Opisthokonta,3P61H@4751|Fungi,3V1VS@5204|Basidiomycota,2256X@155619|Agaricomycetes,3W45I@5338|Agaricales	3P61H@4751|Fungi				8
MDBOrad1_01125	COG0271@1|root,KOG3348@2759|Eukaryota,3A86M@33154|Opisthokonta,3P6UR@4751|Fungi,3V28F@5204|Basidiomycota,22A66@155619|Agaricomycetes,3W8DE@5338|Agaricales	3P6UR@4751|Fungi	RecName: Full=Uncharacterized bolA-like protein C8C9.11 [Schizosaccharomyces pombe 972h-]	BolA-like protein
MDBOrad1_01126	COG0288@1|root,2RXIV@2759|Eukaryota,3A0V8@33154|Opisthokonta,3P2JY@4751|Fungi,3V2M5@5204|Basidiomycota,229FG@155619|Agaricomycetes,3H59H@355688|Agaricomycetes incertae sedis	3P2JY@4751|Fungi	RecName: Full=Beta-carbonic anhydrase 1; Short=Beta-CA 1; AltName: Full=Carbonate dehydratase 1; AltName: Full=mtCA 1 [Mycobacterium tuberculosis variant bovis AF2122/97]_x0001_P9WPJ6.1 RecName: Full=Beta-carbonic anhydrase 1; Short=Beta-CA 1; AltName: Full=Carbonate dehydratase 1; AltName: Full=mtCA 1 [Mycobacterium tuberculosis CDC1551]_x0001_P9WPJ7.1 RecName: Full=Beta-carbonic anhydrase 1; Sh…	Carbonic anhydrase
MDBOrad1_01127	KOG2218@1|root,KOG2218@2759|Eukaryota,38E05@33154|Opisthokonta,3NY78@4751|Fungi,3UZ4K@5204|Basidiomycota,225K4@155619|Agaricomycetes,3W4F8@5338|Agaricales	3NY78@4751|Fungi	RecName: Full=RINT1-like protein; Short=DmRINT-1 [Drosophila melanogaster]	RINT-1 / TIP-1 family
MDBOrad1_01128	COG1241@1|root,KOG0479@2759|Eukaryota,38CI6@33154|Opisthokonta,3NXER@4751|Fungi,3UXXC@5204|Basidiomycota,224R9@155619|Agaricomycetes,3W6M5@5338|Agaricales	3NXER@4751|Fungi	RecName: Full=DNA replication licensing factor mcm3; AltName: Full=Minichromosome maintenance protein 3 [Schizosaccharomyces pombe 972h-]	MCM P-loop domain
MDBOrad1_01129					SP(Sec/SPI)		yes
MDBOrad1_01130	KOG0282@1|root,KOG0282@2759|Eukaryota,38XAV@33154|Opisthokonta,3NWGH@4751|Fungi,3UYGA@5204|Basidiomycota,2288H@155619|Agaricomycetes,3W4ET@5338|Agaricales	3NWGH@4751|Fungi	RecName: Full=Pre-mRNA-processing factor 17; AltName: Full=Cell division cycle 40 homolog; AltName: Full=EH-binding protein 3; Short=Ehb3; AltName: Full=PRP17 homolog; Short=hPRP17 [Homo sapiens]	WD domain, G-beta repeat
MDBOrad1_01131	COG5147@1|root,KOG0048@2759|Eukaryota,38EUR@33154|Opisthokonta,3Q392@4751|Fungi,3V4TA@5204|Basidiomycota,22F92@155619|Agaricomycetes,3WA18@5338|Agaricales	3Q392@4751|Fungi	RecName: Full=Transcription factor MYB3R-5; AltName: Full=Myb-related protein 3R-5 [Arabidopsis thaliana]	Myb-like DNA-binding domain
MDBOrad1_01132	COG0457@1|root,KOG0553@2759|Eukaryota,394I4@33154|Opisthokonta,3NWJA@4751|Fungi,3UYT2@5204|Basidiomycota,226Y0@155619|Agaricomycetes,3W5XN@5338|Agaricales	3NWJA@4751|Fungi	RecName: Full=Small glutamine-rich tetratricopeptide repeat-containing protein 2 [Ustilago maydis 521]	Homodimerisation domain of SGTA
MDBOrad1_01133	KOG0289@1|root,KOG0289@2759|Eukaryota,38CRU@33154|Opisthokonta,3NV8G@4751|Fungi,3UY4M@5204|Basidiomycota,22656@155619|Agaricomycetes,3H108@355688|Agaricomycetes incertae sedis	3NV8G@4751|Fungi	RecName: Full=Pre-mRNA-processing factor 19 homolog 1; AltName: Full=MOS4-associated complex protein 3A; Short=MAC protein 3A; AltName: Full=Plant U-box protein 59; AltName: Full=U-box domain-containing protein 59 [Arabidopsis thaliana]	Prp19/Pso4-like
MDBOrad1_01134
MDBOrad1_01135	KOG2262@1|root,KOG2262@2759|Eukaryota,38D6E@33154|Opisthokonta,3NUA6@4751|Fungi,3V514@5204|Basidiomycota,224S9@155619|Agaricomycetes,3W6H8@5338|Agaricales	3NUA6@4751|Fungi	RecName: Full=Glutathione transporter 1 [Schizosaccharomyces pombe 972h-]	OPT oligopeptide transporter protein		14
MDBOrad1_01136	COG2175@1|root,2QT05@2759|Eukaryota,3915V@33154|Opisthokonta,3NTVZ@4751|Fungi,3V07D@5204|Basidiomycota,225FF@155619|Agaricomycetes,3W3CB@5338|Agaricales	3NTVZ@4751|Fungi	RecName: Full=Alpha-ketoglutarate-dependent sulfonate dioxygenase [Saccharomyces cerevisiae S288C]	Taurine catabolism dioxygenase TauD, TfdA family
MDBOrad1_01137	KOG2642@1|root,KOG2642@2759|Eukaryota,39INY@33154|Opisthokonta,3NXZQ@4751|Fungi,3V050@5204|Basidiomycota,22843@155619|Agaricomycetes,3H34U@355688|Agaricomycetes incertae sedis	3NXZQ@4751|Fungi	RecName: Full=Putative Dol-P-Glc:Glc(2)Man(9)GlcNAc(2)-PP-Dol alpha-1,2-glucosyltransferase; AltName: Full=Alpha-1,2-glucosyltransferase ALG10-A; AltName: Full=Alpha-2-glucosyltransferase ALG10-B; AltName: Full=Asparagine-linked glycosylation protein 10 homolog B; AltName: Full=Potassium channel regulator 1 [Rattus norvegicus]	DIE2/ALG10 family		9
MDBOrad1_01138	2EEFA@1|root,2SJVK@2759|Eukaryota,3AJF0@33154|Opisthokonta,3PCTN@4751|Fungi,3V4J1@5204|Basidiomycota,228VV@155619|Agaricomycetes,3W4N1@5338|Agaricales	3PCTN@4751|Fungi
MDBOrad1_01139	COG0513@1|root,KOG0327@2759|Eukaryota,38CTS@33154|Opisthokonta,3NUYA@4751|Fungi,3V00X@5204|Basidiomycota,225PH@155619|Agaricomycetes,3H3FA@355688|Agaricomycetes incertae sedis	3NUYA@4751|Fungi	RecName: Full=ATP-dependent RNA helicase eIF4A; AltName: Full=Eukaryotic initiation factor 4A; Short=eIF-4A; AltName: Full=Translation initiation factor 1 [Ustilago maydis 521]	DEAD/DEAH box helicase
MDBOrad1_01140						2
MDBOrad1_01141	2C4CS@1|root,2S20P@2759|Eukaryota,38Q05@33154|Opisthokonta,3NWR7@4751|Fungi,3V1GF@5204|Basidiomycota,224TN@155619|Agaricomycetes,3W35K@5338|Agaricales	3NWR7@4751|Fungi		Spc7 kinetochore protein
MDBOrad1_01142	COG5059@1|root,KOG0247@2759|Eukaryota,38FXQ@33154|Opisthokonta,3NY7X@4751|Fungi,3UZ9V@5204|Basidiomycota,224UF@155619|Agaricomycetes,3W5SK@5338|Agaricales	3NY7X@4751|Fungi	RecName: Full=Kinesin-like protein KIF23 [Mus musculus]	Kinesin motor domain
MDBOrad1_01143	KOG3281@1|root,KOG3281@2759|Eukaryota,39WBU@33154|Opisthokonta,3NZKA@4751|Fungi,3V154@5204|Basidiomycota,224PE@155619|Agaricomycetes,3W4NG@5338|Agaricales	3NZKA@4751|Fungi		ATP11 protein
MDBOrad1_01144	COG2124@1|root,KOG0157@2759|Eukaryota,38CHP@33154|Opisthokonta,3PCWA@4751|Fungi,3V4DM@5204|Basidiomycota,228T0@155619|Agaricomycetes	3PCWA@4751|Fungi	RecName: Full=Ganoderic acid synthetase CYP5150L8; AltName: Full=Cytochrome P450 monooxygenase CYP5150L8 [Ganoderma lucidum]	Cytochrome P450
MDBOrad1_01145	29H28@1|root,2SUH1@2759|Eukaryota,3AQX0@33154|Opisthokonta,3PFPI@4751|Fungi,3V6F1@5204|Basidiomycota,22DHI@155619|Agaricomycetes,3W9EU@5338|Agaricales	3PFPI@4751|Fungi
MDBOrad1_01146	COG2124@1|root,KOG0157@2759|Eukaryota,39E4B@33154|Opisthokonta,3NVJI@4751|Fungi,3UZ0V@5204|Basidiomycota,22767@155619|Agaricomycetes,3W3DF@5338|Agaricales	3NVJI@4751|Fungi	RecName: Full=C-22 sterol desaturase ERG5; AltName: Full=Cytochrome P450 61; AltName: Full=Ergosterol biosynthetic protein 5 [Schizosaccharomyces pombe 972h-]	Cytochrome P450		2
MDBOrad1_01147	COG2124@1|root,KOG0157@2759|Eukaryota,3AHII@33154|Opisthokonta,3PCXJ@4751|Fungi,3V3SN@5204|Basidiomycota,227E8@155619|Agaricomycetes,3W5TA@5338|Agaricales	3PCXJ@4751|Fungi	RecName: Full=Cytochrome P450 monooxygenase 205 [Postia placenta Mad-698-R]	Cytochrome P450		1
MDBOrad1_01148	COG0477@1|root,KOG3574@2759|Eukaryota,38C8A@33154|Opisthokonta,3NW00@4751|Fungi,3UYR2@5204|Basidiomycota,225BV@155619|Agaricomycetes,3W35A@5338|Agaricales	3NW00@4751|Fungi	RecName: Full=Uncharacterized membrane protein YBR220C [Saccharomyces cerevisiae S288C]	Acetyl-coenzyme A transporter 1		9
MDBOrad1_01149	KOG1862@1|root,KOG1862@2759|Eukaryota,38UDY@33154|Opisthokonta,3NUVE@4751|Fungi,3V0ZY@5204|Basidiomycota,224KC@155619|Agaricomycetes,3H3ZT@355688|Agaricomycetes incertae sedis	3NUVE@4751|Fungi	RecName: Full=GYF domain-containing protein mpd2 [Schizosaccharomyces pombe 972h-]	GYF domain
MDBOrad1_01150	2E410@1|root,2SAZS@2759|Eukaryota,3A86H@33154|Opisthokonta,3P7HP@4751|Fungi,3V271@5204|Basidiomycota,22C7P@155619|Agaricomycetes	3P7HP@4751|Fungi
MDBOrad1_01151
MDBOrad1_01152	2CN98@1|root,2QUM3@2759|Eukaryota,39HXV@33154|Opisthokonta,3NYDY@4751|Fungi,3V3RR@5204|Basidiomycota,22FE8@155619|Agaricomycetes,3WA2R@5338|Agaricales	3NYDY@4751|Fungi	RecName: Full=Probable glycosidase C21B10.07 [Schizosaccharomyces pombe 972h-]		SP(Sec/SPI)		yes
MDBOrad1_01153	KOG4224@1|root,KOG4224@2759|Eukaryota,3ATTB@33154|Opisthokonta,3NU9V@4751|Fungi,3UYAD@5204|Basidiomycota,2281B@155619|Agaricomycetes,3W6KT@5338|Agaricales	3NU9V@4751|Fungi	RecName: Full=Vacuolar protein 8 [Cryptococcus neoformans var. neoformans JEC21]_x0001_P0CM61.1 RecName: Full=Vacuolar protein 8 [Cryptococcus neoformans var. neoformans B-3501A]	Armadillo/beta-catenin-like repeat
MDBOrad1_01154	COG0617@1|root,KOG2159@2759|Eukaryota,38BGG@33154|Opisthokonta,3NU7R@4751|Fungi,3UY1W@5204|Basidiomycota,2264T@155619|Agaricomycetes,3W460@5338|Agaricales	3NU7R@4751|Fungi	RecName: Full=CCA tRNA nucleotidyltransferase, mitochondrial; AltName: Full=CCA-adding enzyme; AltName: Full=tRNA CCA-pyrophosphorylase; AltName: Full=tRNA adenylyltransferase; AltName: Full=tRNA nucleotidyltransferase; Flags: Precursor [Saccharomyces cerevisiae S288C]	Poly A polymerase head domain
MDBOrad1_01155	KOG0527@1|root,KOG0528@2759|Eukaryota,39KPY@33154|Opisthokonta,3Q539@4751|Fungi,3VCE0@5204|Basidiomycota,22CJX@155619|Agaricomycetes	3Q539@4751|Fungi	RecName: Full=Repressor ROX1; AltName: Full=Heme-dependent repression factor; AltName: Full=Hypoxic function repressor [Saccharomyces cerevisiae S288C]	HMG (high mobility group) box
MDBOrad1_01156	KOG0344@1|root,KOG0344@2759|Eukaryota,38DA6@33154|Opisthokonta,3NUDA@4751|Fungi,3UXYS@5204|Basidiomycota,226NH@155619|Agaricomycetes,3W6CQ@5338|Agaricales	3NUDA@4751|Fungi	RecName: Full=DEAD-box ATP-dependent RNA helicase 57 [Oryza sativa Japonica Group]	DEAD/DEAH box helicase
MDBOrad1_01157	COG2304@1|root,2QRPK@2759|Eukaryota,38DTU@33154|Opisthokonta,3NXEZ@4751|Fungi,3V39F@5204|Basidiomycota,228KI@155619|Agaricomycetes,3W6A8@5338|Agaricales	3NXEZ@4751|Fungi	RecName: Full=von Willebrand factor A domain-containing protein DDB_G0292740 [Dictyostelium discoideum]	Vault protein inter-alpha-trypsin domain
MDBOrad1_01158	COG0513@1|root,KOG0329@2759|Eukaryota,38BRK@33154|Opisthokonta,3NU8C@4751|Fungi,3UZWI@5204|Basidiomycota,2273Q@155619|Agaricomycetes,3W4QC@5338|Agaricales	3NU8C@4751|Fungi	RecName: Full=ATP-dependent RNA helicase SUB2 [Cryptococcus neoformans var. neoformans JEC21]_x0001_P0CQ97.1 RecName: Full=ATP-dependent RNA helicase SUB2 [Cryptococcus neoformans var. neoformans B-3501A]	DEAD/DEAH box helicase
MDBOrad1_01159	COG0513@1|root,KOG0329@2759|Eukaryota,38BRK@33154|Opisthokonta,3NU8C@4751|Fungi,3UZWI@5204|Basidiomycota,2273Q@155619|Agaricomycetes,3W4QC@5338|Agaricales	3NU8C@4751|Fungi	RecName: Full=ATP-dependent RNA helicase SUB2 [Cryptococcus neoformans var. neoformans JEC21]_x0001_P0CQ97.1 RecName: Full=ATP-dependent RNA helicase SUB2 [Cryptococcus neoformans var. neoformans B-3501A]	Helicase conserved C-terminal domain
MDBOrad1_01160	COG0642@1|root,KOG0519@2759|Eukaryota,391YN@33154|Opisthokonta,3NV7C@4751|Fungi,3V3GK@5204|Basidiomycota,2269I@155619|Agaricomycetes,3W31P@5338|Agaricales	3NV7C@4751|Fungi	RecName: Full=Peroxide stress-activated histidine kinase mak2; AltName: Full=His-Asp phosphorelay kinase phk1; AltName: Full=Mcs4-associated kinase 2 [Schizosaccharomyces pombe 972h-]	Histidine kinase-, DNA gyrase B-, and HSP90-like ATPase
MDBOrad1_01161
MDBOrad1_01162	KOG1192@1|root,KOG1192@2759|Eukaryota,39WXN@33154|Opisthokonta,3P9R2@4751|Fungi,3V5EH@5204|Basidiomycota,2293R@155619|Agaricomycetes	3P9R2@4751|Fungi	RecName: Full=UDP-glucosyl transferase 73B2; AltName: Full=Flavonol 7-O-glucosyltransferase; AltName: Full=UDP glucose:flavonoid 7-O-glucosyltransferase [Arabidopsis thaliana]	UDP-glucoronosyl and UDP-glucosyl transferase
MDBOrad1_01163	KOG0594@1|root,KOG0594@2759|Eukaryota,38B58@33154|Opisthokonta,3NVF8@4751|Fungi,3V01X@5204|Basidiomycota,224XA@155619|Agaricomycetes,3W5RC@5338|Agaricales	3NVF8@4751|Fungi	RecName: Full=Negative regulator of the PHO system; AltName: Full=Serine/threonine-protein kinase PHO85 [Yarrowia lipolytica CLIB122]	Protein kinase domain
MDBOrad1_01164	KOG4547@1|root,KOG4547@2759|Eukaryota,38HDH@33154|Opisthokonta,3NWZN@4751|Fungi,3UYFY@5204|Basidiomycota,224G2@155619|Agaricomycetes,3W3C2@5338|Agaricales	3NWZN@4751|Fungi	RecName: Full=Uncharacterized protein C1450.03 [Schizosaccharomyces pombe 972h-]	Dip2/Utp12 Family
MDBOrad1_01165
MDBOrad1_01166	2ER1G@1|root,2SQ7K@2759|Eukaryota,3AMNS@33154|Opisthokonta,3PE77@4751|Fungi,3V8TZ@5204|Basidiomycota,22A0J@155619|Agaricomycetes,3H81Y@355688|Agaricomycetes incertae sedis	3PE77@4751|Fungi		MYND finger
MDBOrad1_01167	KOG4168@1|root,KOG4168@2759|Eukaryota,3A8AJ@33154|Opisthokonta,3P706@4751|Fungi,3V2FT@5204|Basidiomycota,229IV@155619|Agaricomycetes,3W7DN@5338|Agaricales	3P706@4751|Fungi	RecName: Full=DNA-directed RNA polymerase III subunit RPC9; Short=RNA polymerase III subunit C9; AltName: Full=Calcitonin gene-related peptide-receptor component protein; Short=CGRP-RCP; Short=CGRP-receptor component protein; Short=CGRPRCP; Short=HsC17 [Homo sapiens]	RNA polymerase Rpb4
MDBOrad1_01168
MDBOrad1_01169	KOG3445@1|root,KOG3445@2759|Eukaryota,3A290@33154|Opisthokonta,3P3DJ@4751|Fungi,3V1YQ@5204|Basidiomycota,229Q5@155619|Agaricomycetes,3H4WV@355688|Agaricomycetes incertae sedis	3P3DJ@4751|Fungi		Mitochondrial ribosomal protein L51 / S25 / CI-B8 domain
MDBOrad1_01170	2CBTK@1|root,2SMEF@2759|Eukaryota,3AIPP@33154|Opisthokonta,3PA6P@4751|Fungi,3V3VB@5204|Basidiomycota,2251K@155619|Agaricomycetes,3W32S@5338|Agaricales	3PA6P@4751|Fungi
MDBOrad1_01171	KOG4470@1|root,KOG4470@2759|Eukaryota,39S6K@33154|Opisthokonta,3P9V7@4751|Fungi,3V5F4@5204|Basidiomycota,22787@155619|Agaricomycetes,3W6UP@5338|Agaricales	3P9V7@4751|Fungi	RecName: Full=Proteasome activator complex subunit 3; AltName: Full=Activator of multicatalytic protease subunit 3; AltName: Full=Proteasome activator 28 subunit gamma; Short=PA28g; Short=PA28gamma [Pongo abelii]	Proteasome activator pa28 beta subunit
MDBOrad1_01172	COG5179@1|root,KOG0008@2759|Eukaryota,38F7T@33154|Opisthokonta,3NWFE@4751|Fungi,3UZYQ@5204|Basidiomycota,2257I@155619|Agaricomycetes,3W3M0@5338|Agaricales	3NWFE@4751|Fungi	RecName: Full=Putative transcription initiation factor TFIID 111 kDa subunit; AltName: Full=TAFII-111; AltName: Full=TBP-associated factor 111 kDa [Schizosaccharomyces pombe 972h-]	Protein of unknown function (DUF3591)
MDBOrad1_01173	COG2072@1|root,KOG1399@2759|Eukaryota,38D7U@33154|Opisthokonta,3NUI0@4751|Fungi,3V494@5204|Basidiomycota,228UK@155619|Agaricomycetes,3H72R@355688|Agaricomycetes incertae sedis	3NUI0@4751|Fungi	RecName: Full=FAD-binding monooxygenase moxY; AltName: Full=Dothistromin biosynthesis protein moxY [Dothistroma septosporum NZE10]_x0001_Q30DW9.1 RecName: Full=FAD-binding monooxygenase moxY; AltName: Full=Dothistromin biosynthesis protein moxY [Dothistroma septosporum]	Flavin-binding monooxygenase-like
MDBOrad1_01174	COG2072@1|root,KOG1399@2759|Eukaryota,39UT7@33154|Opisthokonta,3NYC2@4751|Fungi,3V4VT@5204|Basidiomycota,229QW@155619|Agaricomycetes,3H50J@355688|Agaricomycetes incertae sedis	3NYC2@4751|Fungi	RecName: Full=FAD-containing monooxygenase EthA; AltName: Full=Baeyer-Villiger monooxygenase; Short=BVMO; AltName: Full=Prodrug activator EtaA [Mycolicibacterium smegmatis MC2 155]	FAD dependent oxidoreductase		1
MDBOrad1_01175	KOG1721@1|root,KOG1721@2759|Eukaryota,39RGS@33154|Opisthokonta,3NW34@4751|Fungi,3V0ZK@5204|Basidiomycota,228CJ@155619|Agaricomycetes,3W4G7@5338|Agaricales	3NW34@4751|Fungi	RecName: Full=pH-response transcription factor pacC/RIM101 [Cryptococcus neoformans var. neoformans JEC21]_x0001_P0CS63.1 RecName: Full=pH-response transcription factor pacC/RIM101 [Cryptococcus neoformans var. neoformans B-3501A]	Zinc finger, C2H2 type
MDBOrad1_01176	KOG0379@1|root,KOG0379@2759|Eukaryota,38C0C@33154|Opisthokonta,3NXSA@4751|Fungi,3UYA9@5204|Basidiomycota,228J0@155619|Agaricomycetes,3H2RI@355688|Agaricomycetes incertae sedis	3NXSA@4751|Fungi	RecName: Full=Tip elongation aberrant protein 1; AltName: Full=Altered polarity protein 8; AltName: Full=Cell polarity protein tea1 [Schizosaccharomyces pombe 972h-]	Galactose oxidase, central domain
MDBOrad1_01177	2CNFS@1|root,2QVZ9@2759|Eukaryota,39SAK@33154|Opisthokonta,3NWJ8@4751|Fungi,3V44V@5204|Basidiomycota,227R5@155619|Agaricomycetes,3H0DQ@355688|Agaricomycetes incertae sedis	3NWJ8@4751|Fungi		Fungal specific transcription factor domain
MDBOrad1_01178	2EWXI@1|root,2SYNZ@2759|Eukaryota,3ATZ5@33154|Opisthokonta,3PI6U@4751|Fungi,3V6N3@5204|Basidiomycota,22CS7@155619|Agaricomycetes,3W8K5@5338|Agaricales	3PI6U@4751|Fungi
MDBOrad1_01179	COG5090@1|root,KOG2905@2759|Eukaryota,38F4W@33154|Opisthokonta,3P3UN@4751|Fungi,3V14G@5204|Basidiomycota,228BC@155619|Agaricomycetes,3W33J@5338|Agaricales	3P3UN@4751|Fungi	RecName: Full=Transcription initiation factor IIF subunit beta; AltName: Full=TFIIF medium subunit; AltName: Full=TFIIF-beta [Schizosaccharomyces pombe 972h-]	TFIIF, beta subunit HTH domain
MDBOrad1_01180	2CMZJ@1|root,2QSY2@2759|Eukaryota,38DF4@33154|Opisthokonta,3NUPW@4751|Fungi,3UZSR@5204|Basidiomycota,226J3@155619|Agaricomycetes,3H1UE@355688|Agaricomycetes incertae sedis	3NUPW@4751|Fungi	RecName: Full=ABC-transporter-regulating transcription factor [Aspergillus oryzae RIB40]	Fungal specific transcription factor domain
MDBOrad1_01181	2CMZJ@1|root,2QSY2@2759|Eukaryota,38DF4@33154|Opisthokonta,3NUPW@4751|Fungi,3UZSR@5204|Basidiomycota,226J3@155619|Agaricomycetes	3NUPW@4751|Fungi		Fungal specific transcription factor domain		1
MDBOrad1_01182	COG0539@1|root,KOG1070@2759|Eukaryota,38CAS@33154|Opisthokonta,3NVPJ@4751|Fungi,3UXWW@5204|Basidiomycota,228PA@155619|Agaricomycetes,3W3YJ@5338|Agaricales	3NVPJ@4751|Fungi	RecName: Full=rRNA biogenesis protein rrp5; AltName: Full=Ribosomal RNA-processing protein 5; AltName: Full=U3 small nucleolar RNA-associated protein rrp5; Short=U3 snoRNA-associated protein rrp5 [Schizosaccharomyces pombe 972h-]	S1 RNA binding domain
MDBOrad1_01183	COG0083@1|root,KOG1537@2759|Eukaryota,39J8X@33154|Opisthokonta,3NVIX@4751|Fungi,3UYCW@5204|Basidiomycota,224M5@155619|Agaricomycetes,3W3WQ@5338|Agaricales	3NVIX@4751|Fungi	RecName: Full=Homoserine kinase; Short=HK; Short=HSK [Saccharomyces cerevisiae S288C]	GHMP kinases N terminal domain
MDBOrad1_01184	KOG3313@1|root,KOG3313@2759|Eukaryota,38DQ2@33154|Opisthokonta,3NX0J@4751|Fungi,3V0U4@5204|Basidiomycota,22899@155619|Agaricomycetes,3H389@355688|Agaricomycetes incertae sedis	3NX0J@4751|Fungi	RecName: Full=Prefoldin subunit 3; AltName: Full=Elsinochromes biosynthesis cluster protein PRF1 [Elsinoe fawcettii]	Prefoldin subunit
MDBOrad1_01185	KOG1759@1|root,KOG1759@2759|Eukaryota,3A3MR@33154|Opisthokonta,3P9E6@4751|Fungi,3V5UT@5204|Basidiomycota,22AAU@155619|Agaricomycetes,3H5WY@355688|Agaricomycetes incertae sedis	3P9E6@4751|Fungi		Macrophage migration inhibitory factor (MIF)
MDBOrad1_01186	COG5245@1|root,KOG3595@2759|Eukaryota,38BS8@33154|Opisthokonta,3NVTS@4751|Fungi,3UXZU@5204|Basidiomycota,227SE@155619|Agaricomycetes,3W61M@5338|Agaricales	3NVTS@4751|Fungi	RecName: Full=Cytoplasmic dynein 1 heavy chain 1; AltName: Full=Cytoplasmic dynein heavy chain 1; AltName: Full=Dynein heavy chain, cytosolic [Homo sapiens]	Hydrolytic ATP binding site of dynein motor region
MDBOrad1_01187	COG5574@1|root,KOG0317@2759|Eukaryota,38ESB@33154|Opisthokonta,3NWSD@4751|Fungi,3V1BG@5204|Basidiomycota,228N8@155619|Agaricomycetes,3W573@5338|Agaricales	3NWSD@4751|Fungi	RecName: Full=Peroxisome biogenesis factor 10; AltName: Full=Peroxin-10; AltName: Full=Peroxisomal biogenesis factor 10; AltName: Full=Peroxisome assembly protein 10; AltName: Full=Peroxisome assembly protein PER8 [Ogataea angusta]	Pex2 / Pex12 amino terminal region		1
MDBOrad1_01188	KOG0252@1|root,KOG0252@2759|Eukaryota,38H3A@33154|Opisthokonta,3NTWV@4751|Fungi,3UY2V@5204|Basidiomycota,227E0@155619|Agaricomycetes,3H081@355688|Agaricomycetes incertae sedis	3NTWV@4751|Fungi	RecName: Full=Probable metabolite transporter C2H8.02 [Schizosaccharomyces pombe 972h-]	Sugar (and other) transporter		10
MDBOrad1_01189	COG0151@1|root,KOG0237@2759|Eukaryota,38BPB@33154|Opisthokonta,3NXWQ@4751|Fungi,3UZ1Z@5204|Basidiomycota,22600@155619|Agaricomycetes,3W450@5338|Agaricales	3NXWQ@4751|Fungi	RecName: Full=Bifunctional purine biosynthetic protein ADE5,7; Includes: RecName: Full=Phosphoribosylamine--glycine ligase; AltName: Full=Glycinamide ribonucleotide synthetase; Short=GAR synthetase; Short=GARS; AltName: Full=Phosphoribosylglycinamide synthetase; Includes: RecName: Full=Phosphoribosylformylglycinamidine cyclo-ligase; AltName: Full=AIR synthase; Short=AIR synthetase; Short=AIRS; Al…	Phosphoribosylglycinamide synthetase, ATP-grasp (A) domain
MDBOrad1_01190	2C9ZB@1|root,2S4MW@2759|Eukaryota,3A745@33154|Opisthokonta,3P5GF@4751|Fungi,3V1NG@5204|Basidiomycota,2260P@155619|Agaricomycetes,3W6HX@5338|Agaricales	3P5GF@4751|Fungi		RNA-binding, Nab2-type zinc finger
MDBOrad1_01191	COG0240@1|root,KOG2711@2759|Eukaryota,38E7F@33154|Opisthokonta,3NVN7@4751|Fungi,3V3HT@5204|Basidiomycota,2253R@155619|Agaricomycetes,3W4SD@5338|Agaricales	3NVN7@4751|Fungi	RecName: Full=Glycerol-3-phosphate dehydrogenase [NAD(P)+]; AltName: Full=NAD(P)H-dependent glycerol-3-phosphate dehydrogenase [Limosilactobacillus reuteri subsp. reuteri]_x0001_B2G5Z4.1 RecName: Full=Glycerol-3-phosphate dehydrogenase [NAD(P)+]; AltName: Full=NAD(P)H-dependent glycerol-3-phosphate dehydrogenase [Limosilactobacillus reuteri JCM 1112]	NAD-dependent glycerol-3-phosphate dehydrogenase C-terminus
MDBOrad1_01192	KOG0812@1|root,KOG0812@2759|Eukaryota,38YNH@33154|Opisthokonta,3NU11@4751|Fungi,3UY5I@5204|Basidiomycota,22576@155619|Agaricomycetes,3W3YM@5338|Agaricales	3NU11@4751|Fungi	RecName: Full=Integral membrane protein sed5 [Schizosaccharomyces pombe 972h-]	SNARE domain		1
MDBOrad1_01193	KOG0118@1|root,KOG0118@2759|Eukaryota,3A3UV@33154|Opisthokonta,3P54Y@4751|Fungi,3V1NU@5204|Basidiomycota,2299H@155619|Agaricomycetes,3W71R@5338|Agaricales	3P54Y@4751|Fungi	RecName: Full=Uncharacterized RNA-binding protein C365.04c [Schizosaccharomyces pombe 972h-]	RNA recognition motif. (a.k.a. RRM, RBD, or RNP domain)
MDBOrad1_01194	2CP81@1|root,2R0T6@2759|Eukaryota,3AY75@33154|Opisthokonta,3PJCB@4751|Fungi,3V8P3@5204|Basidiomycota,229IQ@155619|Agaricomycetes,3W7E3@5338|Agaricales	3PJCB@4751|Fungi
MDBOrad1_01195	2DMJA@1|root,2S655@2759|Eukaryota,3A85D@33154|Opisthokonta,3P5FH@4751|Fungi,3V6KJ@5204|Basidiomycota,224QF@155619|Agaricomycetes,3W58F@5338|Agaricales	3P5FH@4751|Fungi				4
MDBOrad1_01196	COG0154@1|root,KOG1212@2759|Eukaryota,38CWX@33154|Opisthokonta,3NTYP@4751|Fungi,3V04C@5204|Basidiomycota,224XR@155619|Agaricomycetes,3W5BY@5338|Agaricales	3NTYP@4751|Fungi	RecName: Full=Acetamidase [Aspergillus oryzae RIB40]	Amidase
MDBOrad1_01197	2CSR3@1|root,2RCUF@2759|Eukaryota,3AYVQ@33154|Opisthokonta,3PJZC@4751|Fungi,3V9FX@5204|Basidiomycota,2291U@155619|Agaricomycetes,3W4G4@5338|Agaricales	3PJZC@4751|Fungi
MDBOrad1_01198	KOG0302@1|root,KOG0302@2759|Eukaryota,38C0U@33154|Opisthokonta,3NY9Y@4751|Fungi,3UZP8@5204|Basidiomycota,224U9@155619|Agaricomycetes	3NY9Y@4751|Fungi	RecName: Full=Ribosome assembly protein rrb1 [Schizosaccharomyces pombe 972h-]	WD domain, G-beta repeat
MDBOrad1_01199	2CW7M@1|root,2S4I4@2759|Eukaryota,3A669@33154|Opisthokonta,3P5Y5@4751|Fungi,3V1N3@5204|Basidiomycota,22577@155619|Agaricomycetes,3W4FX@5338|Agaricales	3P5Y5@4751|Fungi		Anaphase-promoting complex subunit 5
MDBOrad1_01200	COG1028@1|root,KOG1208@2759|Eukaryota,38CZD@33154|Opisthokonta,3P0PC@4751|Fungi,3V0S0@5204|Basidiomycota,2YDW7@29000|Pucciniomycotina	3P0PC@4751|Fungi	RecName: Full=Short chain dehydrogenase/reductase dpchH; AltName: Full=Diterpenoid pyrone biosynthesis cluster protein H [Colletotrichum higginsianum IMI 349063]	short chain dehydrogenase
MDBOrad1_01201	2EEVC@1|root,2SK6A@2759|Eukaryota,3AFEK@33154|Opisthokonta,3PB2D@4751|Fungi,3V3CP@5204|Basidiomycota,229C0@155619|Agaricomycetes,3H6C7@355688|Agaricomycetes incertae sedis	3PB2D@4751|Fungi				5
MDBOrad1_01202	2EJBS@1|root,2SPIS@2759|Eukaryota,3AKZJ@33154|Opisthokonta,3PDRK@4751|Fungi,3V5BS@5204|Basidiomycota,22A3Z@155619|Agaricomycetes,3W8EK@5338|Agaricales	3PDRK@4751|Fungi
MDBOrad1_01203	KOG0570@1|root,KOG0570@2759|Eukaryota,3AA57@33154|Opisthokonta,3P7WV@4751|Fungi,3V2RS@5204|Basidiomycota,226JY@155619|Agaricomycetes,3H3RY@355688|Agaricomycetes incertae sedis	3P7WV@4751|Fungi	RecName: Full=Mediator of RNA polymerase II transcription subunit 7; AltName: Full=Mediator complex subunit 7 [Ustilago maydis 521]	MED7 protein
MDBOrad1_01204	COG0318@1|root,KOG1176@2759|Eukaryota,38D90@33154|Opisthokonta,3NWZC@4751|Fungi,3V046@5204|Basidiomycota,224SY@155619|Agaricomycetes,3W44K@5338|Agaricales	3NWZC@4751|Fungi	RecName: Full=4-coumarate--CoA ligase-like 7; AltName: Full=4-coumarate--CoA ligase isoform 6; Short=At4CL6 [Arabidopsis thaliana]	AMP-binding enzyme
MDBOrad1_01205	KOG0254@1|root,KOG0254@2759|Eukaryota,39D3H@33154|Opisthokonta,3NWU2@4751|Fungi,3V3UJ@5204|Basidiomycota,226QK@155619|Agaricomycetes,3H2EK@355688|Agaricomycetes incertae sedis	3NWU2@4751|Fungi	RecName: Full=High-affinity glucose transporter [Kluyveromyces lactis NRRL Y-1140]	Sugar (and other) transporter		10
MDBOrad1_01206	COG3836@1|root,2RMPQ@2759|Eukaryota,39TK4@33154|Opisthokonta,3P26E@4751|Fungi,3V1FE@5204|Basidiomycota,2290K@155619|Agaricomycetes,3W8PV@5338|Agaricales	3P26E@4751|Fungi	RecName: Full=2-keto-3-deoxy-L-rhamnonate aldolase; Short=KDR aldolase; AltName: Full=2-dehydro-3-deoxyrhamnonate aldolase [Klebsiella pneumoniae subsp. pneumoniae MGH 78578]	HpcH/HpaI aldolase/citrate lyase family
MDBOrad1_01207	COG0524@1|root,KOG2855@2759|Eukaryota,38FCH@33154|Opisthokonta,3NX2B@4751|Fungi,3V0UP@5204|Basidiomycota,227GE@155619|Agaricomycetes,3H288@355688|Agaricomycetes incertae sedis	3NX2B@4751|Fungi	RecName: Full=Ribokinase; Short=RK [Schizosaccharomyces pombe 972h-]	pfkB family carbohydrate kinase
MDBOrad1_01208	2ASUJ@1|root,2RZQQ@2759|Eukaryota,39TWS@33154|Opisthokonta,3NVAN@4751|Fungi,3V1RR@5204|Basidiomycota,224W2@155619|Agaricomycetes,3H1DG@355688|Agaricomycetes incertae sedis	3NVAN@4751|Fungi	RecName: Full=37S ribosomal protein S25, mitochondrial [Vanderwaltozyma polyspora DSM 70294]	Mitochondrial ribosomal protein S25
MDBOrad1_01209	COG5071@1|root,KOG1498@2759|Eukaryota,38BJ1@33154|Opisthokonta,3NV7Q@4751|Fungi,3UZE2@5204|Basidiomycota,22DKZ@155619|Agaricomycetes,3W3ED@5338|Agaricales	3NV7Q@4751|Fungi	RecName: Full=26S proteasome non-ATPase regulatory subunit 12; AltName: Full=26S proteasome regulatory subunit RPN5; AltName: Full=26S proteasome regulatory subunit p55 [Mus musculus]	PCI domain
MDBOrad1_01210	2D01Q@1|root,2SCF7@2759|Eukaryota,3ABI1@33154|Opisthokonta,3P8EU@4751|Fungi,3V2UE@5204|Basidiomycota,229ST@155619|Agaricomycetes	3P8EU@4751|Fungi	RecName: Full=DNA replication regulator SLD2 [Eremothecium gossypii ATCC 10895]	DNA replication and checkpoint protein
MDBOrad1_01211	2F09W@1|root,2T1GE@2759|Eukaryota,3ATIK@33154|Opisthokonta,3PI1P@4751|Fungi,3V73P@5204|Basidiomycota,22CS9@155619|Agaricomycetes,3W7YX@5338|Agaricales	3PI1P@4751|Fungi
MDBOrad1_01212	COG1028@1|root,KOG1209@2759|Eukaryota,39VCH@33154|Opisthokonta,3P15W@4751|Fungi,3V19X@5204|Basidiomycota,2265W@155619|Agaricomycetes,3W6BQ@5338|Agaricales	3P15W@4751|Fungi	RecName: Full=NADPH-dependent 1-acyldihydroxyacetone phosphate reductase; Short=ADR; AltName: Full=1-acyl DHAP reductase; AltName: Full=Acyl/alkyl DHAP reductase; AltName: Full=Acylglycerone-phosphate reductase; AltName: Full=Triacylglycerol lipase ayr1; Short=TAG lipase [Schizosaccharomyces pombe 972h-]	short chain dehydrogenase
MDBOrad1_01213	2D31X@1|root,2SPXZ@2759|Eukaryota,3AM02@33154|Opisthokonta,3PDTJ@4751|Fungi,3V5FC@5204|Basidiomycota,229TH@155619|Agaricomycetes	3PDTJ@4751|Fungi		Family of unknown function (DUF6534)		7
MDBOrad1_01214	29MJ0@1|root,2RUV2@2759|Eukaryota,39W7H@33154|Opisthokonta,3NV1P@4751|Fungi,3UYXG@5204|Basidiomycota,226KW@155619|Agaricomycetes,3H4A2@355688|Agaricomycetes incertae sedis	3NV1P@4751|Fungi	RecName: Full=Uncharacterized secreted protein ARB_08043; Flags: Precursor [Trichophyton benhamiae CBS 112371]		SP(Sec/SPI)		yes
MDBOrad1_01215	COG5223@1|root,KOG3237@2759|Eukaryota,38B45@33154|Opisthokonta,3P2PU@4751|Fungi,3V0QD@5204|Basidiomycota,228BG@155619|Agaricomycetes,3W62Y@5338|Agaricales	3P2PU@4751|Fungi	RecName: Full=Probable U3 small nucleolar RNA-associated protein 11; Short=U3 snoRNA-associated protein 11 [Schizosaccharomyces pombe 972h-]	Utp11 protein
MDBOrad1_01216	2EEKN@1|root,2SJZX@2759|Eukaryota,3AGRT@33154|Opisthokonta,3PAGU@4751|Fungi,3V3PW@5204|Basidiomycota,224RK@155619|Agaricomycetes,3W5QJ@5338|Agaricales	3PAGU@4751|Fungi
MDBOrad1_01217	KOG1087@1|root,KOG1087@2759|Eukaryota,39TQX@33154|Opisthokonta,3NVR2@4751|Fungi,3V04H@5204|Basidiomycota,227W0@155619|Agaricomycetes,3W4CP@5338|Agaricales	3NVR2@4751|Fungi		VHS domain
MDBOrad1_01218	COG0172@1|root,KOG2509@2759|Eukaryota,38HQ3@33154|Opisthokonta,3NV6W@4751|Fungi,3UZXY@5204|Basidiomycota,22543@155619|Agaricomycetes	3NV6W@4751|Fungi	RecName: Full=Serine--tRNA ligase, chloroplastic/mitochondrial; AltName: Full=AtSRS; AltName: Full=Protein OVULE ABORTION 7; AltName: Full=Seryl-tRNA synthetase; Short=SerRS; AltName: Full=Seryl-tRNA(Ser/Sec) synthetase; Flags: Precursor [Arabidopsis thaliana]	tRNA synthetase class II core domain (G, H, P, S and T)
MDBOrad1_01219	COG0470@1|root,KOG0991@2759|Eukaryota,38G2T@33154|Opisthokonta,3NUUJ@4751|Fungi,3UZPA@5204|Basidiomycota,226B5@155619|Agaricomycetes,3W4UI@5338|Agaricales	3NUUJ@4751|Fungi	RecName: Full=Replication factor C subunit 4; Short=Replication factor C4 [Schizosaccharomyces pombe 972h-]	Replication factor C C-terminal domain
MDBOrad1_01220	2EEVC@1|root,2SK6A@2759|Eukaryota,3AFEK@33154|Opisthokonta,3PB2D@4751|Fungi,3V3CP@5204|Basidiomycota,229C0@155619|Agaricomycetes,3H6C7@355688|Agaricomycetes incertae sedis	3PB2D@4751|Fungi				6
MDBOrad1_01221
MDBOrad1_01222	COG1028@1|root,KOG1208@2759|Eukaryota,38CZD@33154|Opisthokonta,3P0PC@4751|Fungi,3V0S0@5204|Basidiomycota,2YDW7@29000|Pucciniomycotina	3P0PC@4751|Fungi	RecName: Full=Short chain dehydrogenase/reductase dpchH; AltName: Full=Diterpenoid pyrone biosynthesis cluster protein H [Colletotrichum higginsianum IMI 349063]	short chain dehydrogenase
MDBOrad1_01223	COG0846@1|root,KOG2684@2759|Eukaryota,38EDF@33154|Opisthokonta,3NV2F@4751|Fungi,3V012@5204|Basidiomycota,224YZ@155619|Agaricomycetes	3NV2F@4751|Fungi	RecName: Full=NAD-dependent histone deacetylase HST3; AltName: Full=Homologous to SIR2 protein 3; AltName: Full=Regulatory protein SIR2 homolog 3 [Candida albicans SC5314]	Sir2 family
MDBOrad1_01224	COG1758@1|root,KOG3405@2759|Eukaryota,3A3U5@33154|Opisthokonta,3P3W3@4751|Fungi,3V1VP@5204|Basidiomycota,229VI@155619|Agaricomycetes,3W7JI@5338|Agaricales	3P3W3@4751|Fungi	RecName: Full=DNA-directed RNA polymerases I, II, and III subunit RPABC2; Short=RNA polymerases I, II, and III subunit ABC2; AltName: Full=DNA-directed RNA polymerases I, II, and III 15 kDa polypeptide; AltName: Full=RPC16 [Schizosaccharomyces pombe 972h-]	RNA polymerase Rpb6
MDBOrad1_01225	2EVUT@1|root,2SXS4@2759|Eukaryota,3AGFV@33154|Opisthokonta,3PB80@4751|Fungi,3V3M0@5204|Basidiomycota,2278X@155619|Agaricomycetes,3W3ZX@5338|Agaricales	3PB80@4751|Fungi		RNA recognition motif. (a.k.a. RRM, RBD, or RNP domain)
MDBOrad1_01226	KOG1915@1|root,KOG1915@2759|Eukaryota,38FN1@33154|Opisthokonta,3NVIZ@4751|Fungi,3UZBH@5204|Basidiomycota,225SA@155619|Agaricomycetes,3W6M8@5338|Agaricales	3NVIZ@4751|Fungi	RecName: Full=Pre-mRNA-splicing factor CLF1 [Cryptococcus neoformans var. neoformans JEC21]_x0001_P0CO11.1 RecName: Full=Pre-mRNA-splicing factor CLF1 [Cryptococcus neoformans var. neoformans B-3501A]	HAT (Half-A-TPR) repeat
MDBOrad1_01227	2D4UT@1|root,2SWCV@2759|Eukaryota,3AY8C@33154|Opisthokonta,3PJD9@4751|Fungi,3V8Q7@5204|Basidiomycota,22DD3@155619|Agaricomycetes,3W9EY@5338|Agaricales	3PJD9@4751|Fungi		F-box-like
MDBOrad1_01228	COG1075@1|root,2QPNZ@2759|Eukaryota,3A347@33154|Opisthokonta,3P31C@4751|Fungi,3V4F5@5204|Basidiomycota,22746@155619|Agaricomycetes,3H1TK@355688|Agaricomycetes incertae sedis	3P31C@4751|Fungi
MDBOrad1_01229	2EZI4@1|root,2T0UP@2759|Eukaryota,3AS1J@33154|Opisthokonta,3PGSM@4751|Fungi,3V6PW@5204|Basidiomycota,22CUS@155619|Agaricomycetes,3W9M1@5338|Agaricales	3PGSM@4751|Fungi		F-box-like
MDBOrad1_01230	COG0046@1|root,KOG1907@2759|Eukaryota,38F1H@33154|Opisthokonta,3NX0B@4751|Fungi,3UYC6@5204|Basidiomycota,228QW@155619|Agaricomycetes	3NX0B@4751|Fungi	RecName: Full=Phosphoribosylformylglycinamidine synthase; Short=FGAM synthase; Short=FGAMS; AltName: Full=Formylglycinamide ribonucleotide amidotransferase; Short=FGAR amidotransferase; Short=FGAR-AT; AltName: Full=Formylglycinamide ribotide amidotransferase [Saccharomyces cerevisiae S288C]	CobB/CobQ-like glutamine amidotransferase domain
MDBOrad1_01231
MDBOrad1_01232	COG3001@1|root,KOG3021@2759|Eukaryota,38F6U@33154|Opisthokonta,3NXP0@4751|Fungi,3V0WI@5204|Basidiomycota,228QS@155619|Agaricomycetes,3H2SG@355688|Agaricomycetes incertae sedis	3NXP0@4751|Fungi	RecName: Full=Ketosamine-3-kinase; AltName: Full=Fructosamine-3-kinase-related protein; Short=FN3K-RP; Short=FN3K-related protein; AltName: Full=Protein-psicosamine 3-kinase FN3KRP [Mus musculus]	Fructosamine kinase
MDBOrad1_01233	2C3JN@1|root,2S8RC@2759|Eukaryota,3A8XX@33154|Opisthokonta,3P6P9@4751|Fungi,3V2H2@5204|Basidiomycota,224R6@155619|Agaricomycetes,3W38G@5338|Agaricales	3P6P9@4751|Fungi		Cohesin loading factor
MDBOrad1_01234	COG0661@1|root,KOG1236@2759|Eukaryota,38CUG@33154|Opisthokonta,3NWUB@4751|Fungi,3UYRK@5204|Basidiomycota,225F2@155619|Agaricomycetes,3W32H@5338|Agaricales	3NWUB@4751|Fungi	RecName: Full=ABC1 family protein C21C3.03, mitochondrial; Flags: Precursor [Schizosaccharomyces pombe 972h-]	ABC1 atypical kinase-like domain		1
MDBOrad1_01235	COG5597@1|root,KOG1950@2759|Eukaryota,38HKS@33154|Opisthokonta,3NX5G@4751|Fungi,3V0N2@5204|Basidiomycota,227EI@155619|Agaricomycetes,3W39X@5338|Agaricales	3NX5G@4751|Fungi	RecName: Full=Glycogenin-1; Short=GN-1; Short=GN1 [Oryctolagus cuniculus]	Glycosyl transferase family 8
MDBOrad1_01236	2EQAT@1|root,2STC7@2759|Eukaryota,3ARTY@33154|Opisthokonta,3PG3N@4751|Fungi,3V6BC@5204|Basidiomycota,22B06@155619|Agaricomycetes,3W9G6@5338|Agaricales	3PG3N@4751|Fungi
MDBOrad1_01237	2CSUT@1|root,2RD72@2759|Eukaryota,38IEZ@33154|Opisthokonta,3PKC2@4751|Fungi,3V9Y3@5204|Basidiomycota,22CZK@155619|Agaricomycetes	3PKC2@4751|Fungi
MDBOrad1_01238	2BZ14@1|root,2S2II@2759|Eukaryota,3A1ND@33154|Opisthokonta,3P3J3@4751|Fungi,3V1EM@5204|Basidiomycota,229DB@155619|Agaricomycetes,3H56F@355688|Agaricomycetes incertae sedis	3P3J3@4751|Fungi
MDBOrad1_01239	2EJN3@1|root,2SPSJ@2759|Eukaryota,3AKUU@33154|Opisthokonta,3PEAC@4751|Fungi,3V5JQ@5204|Basidiomycota,229R1@155619|Agaricomycetes,3W82M@5338|Agaricales	3PEAC@4751|Fungi
MDBOrad1_01240	COG0085@1|root,KOG0214@2759|Eukaryota,38F5S@33154|Opisthokonta,3NW78@4751|Fungi,3UYSF@5204|Basidiomycota,228D5@155619|Agaricomycetes,3W6JH@5338|Agaricales	3NW78@4751|Fungi	RecName: Full=DNA-directed RNA polymerase II subunit RPB2; Short=RNA polymerase II subunit 2; Short=RNA polymerase II subunit B2; AltName: Full=DNA-directed RNA polymerase II 138 kDa polypeptide [Schizosaccharomyces pombe 972h-]	RNA polymerase Rpb2, domain 6
MDBOrad1_01241	KOG2568@1|root,KOG2568@2759|Eukaryota,38HGW@33154|Opisthokonta,3NXD6@4751|Fungi,3UZY8@5204|Basidiomycota,2264G@155619|Agaricomycetes,3W4GN@5338|Agaricales	3NXD6@4751|Fungi	RecName: Full=Uncharacterized protein C26H5.07c; Flags: Precursor [Schizosaccharomyces pombe 972h-]	Lung seven transmembrane receptor		5
MDBOrad1_01242	COG5391@1|root,KOG2273@2759|Eukaryota,38H15@33154|Opisthokonta,3NWUV@4751|Fungi,3UYM3@5204|Basidiomycota,224VF@155619|Agaricomycetes	3NWUV@4751|Fungi	RecName: Full=Sorting nexin-4; AltName: Full=Autophagy-related protein 24 [Cryptococcus neoformans var. neoformans JEC21]_x0001_P0CR63.1 RecName: Full=Sorting nexin-4; AltName: Full=Autophagy-related protein 24 [Cryptococcus neoformans var. neoformans B-3501A]	PX domain
MDBOrad1_01243	KOG3186@1|root,KOG3186@2759|Eukaryota,39SFK@33154|Opisthokonta,3P318@4751|Fungi,3V29C@5204|Basidiomycota,226IM@155619|Agaricomycetes,3W7AI@5338|Agaricales	3P318@4751|Fungi	RecName: Full=Mitotic spindle assembly checkpoint protein MAD2B; AltName: Full=Mitotic arrest deficient 2-like protein 2; Short=MAD2-like protein 2 [Gallus gallus]	HORMA domain		1
MDBOrad1_01244	KOG0255@1|root,KOG0255@2759|Eukaryota,38CM4@33154|Opisthokonta,3NU52@4751|Fungi,3UYAQ@5204|Basidiomycota,228IZ@155619|Agaricomycetes	3NU52@4751|Fungi	RecName: Full=Itaconate transport protein; AltName: Full=Itaconic acid/2-hydroxyparaconate biosynthesis cluster protein ITP1 [Ustilago maydis]	Major Facilitator Superfamily		12
MDBOrad1_01245	COG0702@1|root,KOG2865@2759|Eukaryota,3A1E7@33154|Opisthokonta,3P2H0@4751|Fungi,3V4VR@5204|Basidiomycota,226VZ@155619|Agaricomycetes,3H125@355688|Agaricomycetes incertae sedis	3P2H0@4751|Fungi	RecName: Full=NADH dehydrogenase [ubiquinone] 1 alpha subcomplex subunit 9, mitochondrial; Flags: Precursor [Arabidopsis thaliana]	3-beta hydroxysteroid dehydrogenase/isomerase family
MDBOrad1_01246	COG1680@1|root,2S68R@2759|Eukaryota,39JFP@33154|Opisthokonta,3Q3SS@4751|Fungi,3V3UV@5204|Basidiomycota,22FEE@155619|Agaricomycetes,3W8QG@5338|Agaricales	3Q3SS@4751|Fungi	RecName: Full=Beta-lactamase-like protein str6; AltName: Full=Strobilurin A biosynthesis cluster protein r6 [Strobilurus tenacellus]	Beta-lactamase
MDBOrad1_01247	COG5118@1|root,KOG2009@2759|Eukaryota,38I0C@33154|Opisthokonta,3P3YS@4751|Fungi,3V1TP@5204|Basidiomycota,224ZJ@155619|Agaricomycetes,3W3V3@5338|Agaricales	3P3YS@4751|Fungi	RecName: Full=Transcription factor TFIIIB component B''; AltName: Full=Transcription factor TFIIIB complex subunit bdp1 [Schizosaccharomyces pombe 972h-]	Myb DNA-binding like
MDBOrad1_01248	COG5641@1|root,KOG1601@2759|Eukaryota,3ACRK@33154|Opisthokonta,3Q59M@4751|Fungi,3V5FQ@5204|Basidiomycota,229SI@155619|Agaricomycetes,3H903@355688|Agaricomycetes incertae sedis	3Q59M@4751|Fungi
MDBOrad1_01249	2EB5K@1|root,2SHAG@2759|Eukaryota,3AF7T@33154|Opisthokonta,3PBXD@4751|Fungi,3V3B8@5204|Basidiomycota,225U4@155619|Agaricomycetes	3PBXD@4751|Fungi				2
MDBOrad1_01250	KOG2262@1|root,KOG2262@2759|Eukaryota,38D6E@33154|Opisthokonta,3NUA6@4751|Fungi,3UYPE@5204|Basidiomycota,225J9@155619|Agaricomycetes,3H28Y@355688|Agaricomycetes incertae sedis	3NUA6@4751|Fungi	RecName: Full=Sexual differentiation process protein isp4 [Schizosaccharomyces pombe 972h-]	OPT oligopeptide transporter protein		13
MDBOrad1_01251	COG0136@1|root,KOG4777@2759|Eukaryota,38FPW@33154|Opisthokonta,3NU99@4751|Fungi,3UY7R@5204|Basidiomycota,227I5@155619|Agaricomycetes,3H0SK@355688|Agaricomycetes incertae sedis	3NU99@4751|Fungi	RecName: Full=Probable aspartate-semialdehyde dehydrogenase; Short=ASA dehydrogenase; Short=ASADH; AltName: Full=Aspartate-beta-semialdehyde dehydrogenase [Schizosaccharomyces pombe 972h-]	Semialdehyde dehydrogenase, dimerisation domain
MDBOrad1_01252
MDBOrad1_01253	COG3346@1|root,KOG1563@2759|Eukaryota,39DSM@33154|Opisthokonta,3NU6X@4751|Fungi,3V0YI@5204|Basidiomycota,225DY@155619|Agaricomycetes,3W3X3@5338|Agaricales	3NU6X@4751|Fungi	RecName: Full=Cytochrome oxidase assembly protein shy1; AltName: Full=SURF1-like protein [Schizosaccharomyces pombe 972h-]	SURF1 family		2
MDBOrad1_01254	KOG0980@1|root,KOG0980@2759|Eukaryota,38H1K@33154|Opisthokonta,3Q3C0@4751|Fungi,3UY9S@5204|Basidiomycota,227XU@155619|Agaricomycetes	3Q3C0@4751|Fungi	RecName: Full=Endocytosis protein end4; AltName: Full=SLA2 protein homolog [Schizosaccharomyces pombe 972h-]	ANTH domain
MDBOrad1_01255	2CBTN@1|root,2SQA7@2759|Eukaryota,3AM4K@33154|Opisthokonta,3PDYX@4751|Fungi,3V5JG@5204|Basidiomycota,22A7H@155619|Agaricomycetes,3W5ZX@5338|Agaricales	3PDYX@4751|Fungi
MDBOrad1_01256	2AWNR@1|root,2RZZ8@2759|Eukaryota,3A3AG@33154|Opisthokonta,3P2UX@4751|Fungi,3V0SR@5204|Basidiomycota,224NY@155619|Agaricomycetes,3W4G3@5338|Agaricales	3P2UX@4751|Fungi				3
MDBOrad1_01257	KOG3869@1|root,KOG3869@2759|Eukaryota,39SK2@33154|Opisthokonta,3NY8V@4751|Fungi,3V0Q9@5204|Basidiomycota,224QP@155619|Agaricomycetes,3W4VB@5338|Agaricales	3NY8V@4751|Fungi	RecName: Full=Pre-mRNA-splicing factor CWC25 [Ustilago maydis 521]	Pre-mRNA splicing factor
MDBOrad1_01258
MDBOrad1_01259
MDBOrad1_01260	COG2453@1|root,KOG1717@2759|Eukaryota,39QCT@33154|Opisthokonta	39QCT@33154|Opisthokonta	RecName: Full=Tyrosine-protein phosphatase yvh1; Short=PTPase yvh1 [Schizosaccharomyces pombe 972h-]	Dual specificity phosphatase, catalytic domain
MDBOrad1_01261	COG0468@1|root,KOG1434@2759|Eukaryota,39J83@33154|Opisthokonta,3NVB0@4751|Fungi,3UY0V@5204|Basidiomycota,228A1@155619|Agaricomycetes,3W6FM@5338|Agaricales	3NVB0@4751|Fungi	RecName: Full=Meiotic recombination protein dmc1 [Schizosaccharomyces pombe 972h-]	Rad51
MDBOrad1_01262
MDBOrad1_01263	KOG1642@1|root,KOG1642@2759|Eukaryota,39RGM@33154|Opisthokonta,3NXW8@4751|Fungi,3V4X2@5204|Basidiomycota,22E8P@155619|Agaricomycetes	3NXW8@4751|Fungi	RecName: Full=Ribonuclease T2; Short=RNase T2; Flags: Precursor [Aspergillus oryzae RIB40]	Ribonuclease T2 family	SP(Sec/SPI)		yes
MDBOrad1_01264	COG2124@1|root,KOG0156@2759|Eukaryota,38BSU@33154|Opisthokonta,3NUFV@4751|Fungi,3UZYG@5204|Basidiomycota,227SH@155619|Agaricomycetes,3H0XR@355688|Agaricomycetes incertae sedis	3NUFV@4751|Fungi	RecName: Full=Cytochrome P450 monooxygenase ARMGADRAFT_1018420; AltName: Full=Melleolide biosynthesis cluster protein ARMGADRAFT_1018420 [Armillaria gallica]	Cytochrome P450		2
MDBOrad1_01265	28I4I@1|root,2SJ0F@2759|Eukaryota,3A3SB@33154|Opisthokonta,3P4U9@4751|Fungi,3V3VS@5204|Basidiomycota,225BJ@155619|Agaricomycetes,3H428@355688|Agaricomycetes incertae sedis	3P4U9@4751|Fungi	RecName: Full=Delta(6)-protoilludene synthase HETIRDRAFT_454193; AltName: Full=Sesquiterpene synthase HETIRDRAFT_454193; AltName: Full=Terpene cyclase HETIRDRAFT_454193 [Heterobasidion irregulare TC 32-1]	Terpene synthase family 2, C-terminal metal binding
MDBOrad1_01266	KOG0254@1|root,KOG0254@2759|Eukaryota,3970G@33154|Opisthokonta,3NW5M@4751|Fungi,3UZRW@5204|Basidiomycota	3NW5M@4751|Fungi	RecName: Full=MFS-type efflux pump LUC4; AltName: Full=Lucilactaene biosynthesis cluster protein 4 [Fusarium sp.]	Major Facilitator Superfamily		11
MDBOrad1_01267	2C7FE@1|root,2S329@2759|Eukaryota,38E65@33154|Opisthokonta,3NWNM@4751|Fungi,3V9IZ@5204|Basidiomycota,22C61@155619|Agaricomycetes,3H7D8@355688|Agaricomycetes incertae sedis	3NWNM@4751|Fungi
MDBOrad1_01268	295G9@1|root,2RCEB@2759|Eukaryota,3AYMP@33154|Opisthokonta,3PJRZ@4751|Fungi,3V95B@5204|Basidiomycota,228V5@155619|Agaricomycetes,3H5SE@355688|Agaricomycetes incertae sedis	3PJRZ@4751|Fungi				6
MDBOrad1_01269	COG0489@1|root,KOG3022@2759|Eukaryota,38EHK@33154|Opisthokonta,3NVQZ@4751|Fungi,3UYEY@5204|Basidiomycota,226JF@155619|Agaricomycetes,3H2S7@355688|Agaricomycetes incertae sedis	3NVQZ@4751|Fungi	RecName: Full=Cytosolic Fe-S cluster assembly factor CFD1; AltName: Full=Cytosolic Fe-S cluster-deficient protein 1 [Cryptococcus neoformans var. neoformans JEC21]_x0001_P0CO91.1 RecName: Full=Cytosolic Fe-S cluster assembly factor CFD1; AltName: Full=Cytosolic Fe-S cluster-deficient protein 1 [Cryptococcus neoformans var. neoformans B-3501A]	NUBPL iron-transfer P-loop NTPase
MDBOrad1_01270	2EJ8H@1|root,2SPG7@2759|Eukaryota,3AMM1@33154|Opisthokonta,3PECB@4751|Fungi,3V5GM@5204|Basidiomycota,22A1Y@155619|Agaricomycetes,3W7SS@5338|Agaricales	3PECB@4751|Fungi
MDBOrad1_01271
MDBOrad1_01272						1
MDBOrad1_01273						1
MDBOrad1_01274	2E9WE@1|root,2R18P@2759|Eukaryota,3AYTM@33154|Opisthokonta,3PI0V@4751|Fungi,3V6ZM@5204|Basidiomycota,22DS2@155619|Agaricomycetes,3W8G6@5338|Agaricales	3PI0V@4751|Fungi		Homeodomain
MDBOrad1_01275	COG2124@1|root,KOG0156@2759|Eukaryota,38BSU@33154|Opisthokonta,3P0Q5@4751|Fungi,3V3S3@5204|Basidiomycota,2266D@155619|Agaricomycetes,3W8WI@5338|Agaricales	3P0Q5@4751|Fungi	RecName: Full=Cytochrome P450 monooxygenase 208 [Postia placenta Mad-698-R]	Cytochrome P450	SP(Sec/SPI)	1
MDBOrad1_01276	2EIVQ@1|root,2SP6Y@2759|Eukaryota,3AM7J@33154|Opisthokonta,3PE3X@4751|Fungi,3V5ES@5204|Basidiomycota,228XW@155619|Agaricomycetes,3W8EC@5338|Agaricales	3PE3X@4751|Fungi			SP(Sec/SPI)	1
MDBOrad1_01277
MDBOrad1_01278	2E9WE@1|root,2R18P@2759|Eukaryota,3AYTM@33154|Opisthokonta,3PI0V@4751|Fungi,3V6ZM@5204|Basidiomycota,22DS2@155619|Agaricomycetes,3W8G6@5338|Agaricales	3PI0V@4751|Fungi		Homeodomain
MDBOrad1_01279	COG1215@1|root,KOG2571@2759|Eukaryota,39K5T@33154|Opisthokonta,3Q4IM@4751|Fungi,3V03B@5204|Basidiomycota,2271C@155619|Agaricomycetes,3W4C0@5338|Agaricales	3Q4IM@4751|Fungi	RecName: Full=Type 2 glycosyltransferase [Zymoseptoria tritici IPO323]	Glycosyltransferase like family 2		3
MDBOrad1_01280	2EG6S@1|root,2SM7G@2759|Eukaryota,3AFAU@33154|Opisthokonta,3PCS5@4751|Fungi,3V2BB@5204|Basidiomycota,2284I@155619|Agaricomycetes,3W3MN@5338|Agaricales	3PCS5@4751|Fungi		GDP-fucose protein O-fucosyltransferase		1
MDBOrad1_01281	COG0699@1|root,KOG0446@2759|Eukaryota,38C4B@33154|Opisthokonta,3NU71@4751|Fungi,3UY0S@5204|Basidiomycota,22609@155619|Agaricomycetes,3W519@5338|Agaricales	3NU71@4751|Fungi	RecName: Full=Dynamin-related protein DNM1 [Saccharomyces cerevisiae S288C]	Dynamin central region
MDBOrad1_01282	COG0339@1|root,KOG2090@2759|Eukaryota,38FWV@33154|Opisthokonta,3NU5K@4751|Fungi,3UZDG@5204|Basidiomycota,224W8@155619|Agaricomycetes,3W4ZY@5338|Agaricales	3NU5K@4751|Fungi	RecName: Full=Mitochondrial intermediate peptidase; Short=MIP; AltName: Full=Octapeptidyl aminopeptidase; Flags: Precursor [Coprinellus disseminatus]	Peptidase family M3
MDBOrad1_01283	2E0E5@1|root,2S7UU@2759|Eukaryota,3A9G8@33154|Opisthokonta,3P6SD@4751|Fungi,3V2CK@5204|Basidiomycota,226DZ@155619|Agaricomycetes,3W5GA@5338|Agaricales	3P6SD@4751|Fungi
MDBOrad1_01284	KOG3410@1|root,KOG3410@2759|Eukaryota,3A8N0@33154|Opisthokonta,3P6SQ@4751|Fungi,3V2CT@5204|Basidiomycota,22A7W@155619|Agaricomycetes	3P6SQ@4751|Fungi	RecName: Full=Protein FAM32A-like [Danio rerio]	FAM32A
MDBOrad1_01285	2CE07@1|root,2T3CX@2759|Eukaryota,3AY9Z@33154|Opisthokonta,3PJEW@4751|Fungi,3V8S2@5204|Basidiomycota,22B6W@155619|Agaricomycetes,3W9HP@5338|Agaricales	3PJEW@4751|Fungi		Ricin-type beta-trefoil lectin domain-like
MDBOrad1_01286	2CYR3@1|root,2S5TH@2759|Eukaryota,3A64S@33154|Opisthokonta,3P6KD@4751|Fungi,3V1SK@5204|Basidiomycota,224TK@155619|Agaricomycetes,3W5EJ@5338|Agaricales	3P6KD@4751|Fungi	RecName: Full=Acetyltransferase eriL; AltName: Full=Erinacine biosynthesis cluster protein L [Hericium erinaceus]	Membrane bound O-acyl transferase family		6
MDBOrad1_01287	KOG2890@1|root,KOG2890@2759|Eukaryota,38B5B@33154|Opisthokonta,3NVED@4751|Fungi,3V065@5204|Basidiomycota,22774@155619|Agaricomycetes,3W33A@5338|Agaricales	3NVED@4751|Fungi	RecName: Full=Transmembrane protein 115; AltName: Full=Protein PL6 homolog [Mus musculus]	Eukaryotic integral membrane protein (DUF1751)		5
MDBOrad1_01288	KOG4654@1|root,KOG4654@2759|Eukaryota,38E7M@33154|Opisthokonta,3NXRH@4751|Fungi,3V0UX@5204|Basidiomycota,227DX@155619|Agaricomycetes,3W8NS@5338|Agaricales	3NXRH@4751|Fungi		Armadillo-like helical domain-containing protein 3, C-terminal
MDBOrad1_01289	KOG4197@1|root,KOG4197@2759|Eukaryota,3A6EA@33154|Opisthokonta,3P69S@4751|Fungi,3V1Y5@5204|Basidiomycota,228F7@155619|Agaricomycetes,3W5FK@5338|Agaricales	3P69S@4751|Fungi		PPR repeat family
MDBOrad1_01290	COG2443@1|root,KOG3498@2759|Eukaryota,3A8AD@33154|Opisthokonta,3P6RT@4751|Fungi,3V2KP@5204|Basidiomycota,22A90@155619|Agaricomycetes,3W83X@5338|Agaricales	3P6RT@4751|Fungi	RecName: Full=Protein transport protein Sec61 subunit gamma [Branchiostoma belcheri]	SecE/Sec61-gamma subunits of protein translocation complex		1
MDBOrad1_01291	2EIYD@1|root,2SQ0Q@2759|Eukaryota,3AM5R@33154|Opisthokonta,3PDX3@4751|Fungi,3V5FN@5204|Basidiomycota,229V6@155619|Agaricomycetes,3H5PY@355688|Agaricomycetes incertae sedis	3PDX3@4751|Fungi				5
MDBOrad1_01292	KOG2033@1|root,KOG2033@2759|Eukaryota,38H9X@33154|Opisthokonta,3P0XQ@4751|Fungi,3VBX7@5204|Basidiomycota,22F0E@155619|Agaricomycetes	3P0XQ@4751|Fungi	RecName: Full=Conserved oligomeric Golgi complex subunit 1; Short=COG complex subunit 1; AltName: Full=Component of oligomeric Golgi complex 1; AltName: Full=Low density lipoprotein receptor defect B-complementing protein [Mus musculus]	Vps51/Vps67
MDBOrad1_01293	28P6R@1|root,2S6SH@2759|Eukaryota,39JV1@33154|Opisthokonta,3Q47A@4751|Fungi,3VCGI@5204|Basidiomycota,22FG1@155619|Agaricomycetes	3Q47A@4751|Fungi
MDBOrad1_01294	COG2912@1|root,2QS7Z@2759|Eukaryota,38E79@33154|Opisthokonta,3P031@4751|Fungi,3V1ZX@5204|Basidiomycota,229PT@155619|Agaricomycetes,3W66I@5338|Agaricales	3P031@4751|Fungi		Hemimethylated DNA-binding protein YccV like
MDBOrad1_01295	KOG3911@1|root,KOG3911@2759|Eukaryota,38G4R@33154|Opisthokonta,3P38A@4751|Fungi,3V0VI@5204|Basidiomycota,225W2@155619|Agaricomycetes,3H4GP@355688|Agaricomycetes incertae sedis	3P38A@4751|Fungi	RecName: Full=Ribosomal RNA processing protein 1 homolog B; AltName: Full=RRP1-like protein B [Homo sapiens]	Nucleolar protein,Nop52
MDBOrad1_01296	KOG0420@1|root,KOG0420@2759|Eukaryota,38GRW@33154|Opisthokonta,3NYKV@4751|Fungi,3UZ2X@5204|Basidiomycota,225WS@155619|Agaricomycetes,3W5WS@5338|Agaricales	3NYKV@4751|Fungi	RecName: Full=NEDD8-conjugating enzyme UBC12; AltName: Full=RUB1-conjugating enzyme; AltName: Full=Ubiquitin carrier protein 12 [Yarrowia lipolytica CLIB122]	Ubiquitin-conjugating enzyme
MDBOrad1_01297	COG3491@1|root,2QR0G@2759|Eukaryota,39RYY@33154|Opisthokonta,3NZ1K@4751|Fungi,3UY8G@5204|Basidiomycota,227KA@155619|Agaricomycetes,3W5IA@5338|Agaricales	3NZ1K@4751|Fungi
MDBOrad1_01298	COG0147@1|root,KOG1224@2759|Eukaryota,38EFT@33154|Opisthokonta,3NU85@4751|Fungi,3UYPT@5204|Basidiomycota,2252N@155619|Agaricomycetes,3W5JP@5338|Agaricales	3NU85@4751|Fungi		Family of unknown function (DUF6593)
MDBOrad1_01299	COG0160@1|root,KOG1404@2759|Eukaryota,38DZP@33154|Opisthokonta,3NTX4@4751|Fungi,3V4JZ@5204|Basidiomycota,22BCD@155619|Agaricomycetes	3NTX4@4751|Fungi	RecName: Full=2,2-dialkylglycine decarboxylase; Short=DGD [Burkholderia cepacia]	Aminotransferase class-III
MDBOrad1_01300	28SX5@1|root,2QZM3@2759|Eukaryota,3AYAB@33154|Opisthokonta,3PJF9@4751|Fungi,3V8SE@5204|Basidiomycota,22DFR@155619|Agaricomycetes,3W9HU@5338|Agaricales	3PJF9@4751|Fungi
MDBOrad1_01301	2EF9J@1|root,2SKHB@2759|Eukaryota,3AF3R@33154|Opisthokonta,3PA1T@4751|Fungi,3V4XP@5204|Basidiomycota,2268A@155619|Agaricomycetes,3H1P1@355688|Agaricomycetes incertae sedis	3PA1T@4751|Fungi
MDBOrad1_01302	COG0147@1|root,KOG1224@2759|Eukaryota,38EFT@33154|Opisthokonta,3NU85@4751|Fungi,3V4JF@5204|Basidiomycota,22DZT@155619|Agaricomycetes	3NU85@4751|Fungi	RecName: Full=Aminodeoxychorismate synthase; Short=ADC synthase; AltName: Full=P-aminobenzoic acid synthase; Short=PABA synthase; AltName: Full=Para-aminobenzoate synthase [Saccharomyces cerevisiae S288C]	chorismate binding enzyme
MDBOrad1_01303	COG2131@1|root,KOG3127@2759|Eukaryota,38HPY@33154|Opisthokonta,3NVNV@4751|Fungi,3V00Z@5204|Basidiomycota,228PT@155619|Agaricomycetes,3W7G8@5338|Agaricales	3NVNV@4751|Fungi	RecName: Full=Deoxycytidylate deaminase; AltName: Full=dCMP deaminase [Schizosaccharomyces pombe 972h-]	Cytidine and deoxycytidylate deaminase zinc-binding region
MDBOrad1_01304	KOG4524@1|root,KOG4524@2759|Eukaryota,397RF@33154|Opisthokonta,3NY9F@4751|Fungi,3UY7T@5204|Basidiomycota,22765@155619|Agaricomycetes,3W675@5338|Agaricales	3NY9F@4751|Fungi	RecName: Full=TEL2-interacting protein 1 [Saccharomyces cerevisiae S288C]
MDBOrad1_01305	2BWI9@1|root,2S6UT@2759|Eukaryota,3A8RD@33154|Opisthokonta,3P6KZ@4751|Fungi,3V2VZ@5204|Basidiomycota,22994@155619|Agaricomycetes,3W78J@5338|Agaricales	3P6KZ@4751|Fungi		RNase P subunit Pop3
MDBOrad1_01306	29PBQ@1|root,2RWPB@2759|Eukaryota,39V31@33154|Opisthokonta,3P0PG@4751|Fungi,3UYQY@5204|Basidiomycota,225SN@155619|Agaricomycetes,3W71E@5338|Agaricales	3P0PG@4751|Fungi		Arrestin (or S-antigen), C-terminal domain
MDBOrad1_01307	KOG0917@1|root,KOG0917@2759|Eukaryota,39RB9@33154|Opisthokonta,3NXYH@4751|Fungi,3V0TK@5204|Basidiomycota,228Q8@155619|Agaricomycetes,3W5G3@5338|Agaricales	3NXYH@4751|Fungi	RecName: Full=Vacuolar protein sorting-associated protein VTA1 homolog [Bos taurus]	Vta1 like
MDBOrad1_01308	2ET9C@1|root,2SVNJ@2759|Eukaryota,3AQFD@33154|Opisthokonta,3PFEU@4751|Fungi,3V6AS@5204|Basidiomycota,22ADI@155619|Agaricomycetes,3W8CK@5338|Agaricales	3PFEU@4751|Fungi
MDBOrad1_01309	COG1574@1|root,2QSHE@2759|Eukaryota,390UK@33154|Opisthokonta,3NXIW@4751|Fungi,3UZCZ@5204|Basidiomycota,226ID@155619|Agaricomycetes,3H3JZ@355688|Agaricomycetes incertae sedis	3NXIW@4751|Fungi	RecName: Full=Protein LONG AFTER FAR-RED 3 [Arabidopsis thaliana]	Amidohydrolase family		1
MDBOrad1_01310
MDBOrad1_01311	2CXXD@1|root,2S0FZ@2759|Eukaryota,39KW7@33154|Opisthokonta,3Q59U@4751|Fungi,3V44S@5204|Basidiomycota,2299T@155619|Agaricomycetes,3W337@5338|Agaricales	3Q59U@4751|Fungi	RecName: Full=Rhamnogalacturonan acetylesterase; Short=RGAE; Flags: Precursor [Aspergillus aculeatus]	GDSL-like Lipase/Acylhydrolase family
MDBOrad1_01312	KOG1963@1|root,KOG1963@2759|Eukaryota,38HQ2@33154|Opisthokonta,3NZTE@4751|Fungi,3UXZA@5204|Basidiomycota,227N0@155619|Agaricomycetes,3H3ZH@355688|Agaricomycetes incertae sedis	3NZTE@4751|Fungi	RecName: Full=WD repeat-containing protein 75 [Xenopus laevis]	WD domain, G-beta repeat
MDBOrad1_01313	COG1161@1|root,KOG1424@2759|Eukaryota,38D1C@33154|Opisthokonta,3P002@4751|Fungi,3V008@5204|Basidiomycota,226KG@155619|Agaricomycetes,3W555@5338|Agaricales	3P002@4751|Fungi	RecName: Full=Guanine nucleotide-binding protein-like 1 [Pongo abelii]	50S ribosome-binding GTPase
MDBOrad1_01314	2D1SH@1|root,2SJ3W@2759|Eukaryota,3AIX1@33154|Opisthokonta,3PAY5@4751|Fungi,3V513@5204|Basidiomycota,229UM@155619|Agaricomycetes,3W3WD@5338|Agaricales	3PAY5@4751|Fungi		F-box-like
MDBOrad1_01315	KOG2232@1|root,KOG2232@2759|Eukaryota,38HV3@33154|Opisthokonta,3NWTU@4751|Fungi,3V088@5204|Basidiomycota,22637@155619|Agaricomycetes,3W3BK@5338|Agaricales	3NWTU@4751|Fungi	RecName: Full=Neutral ceramidase; Short=N-CDase; Short=NCDase; AltName: Full=Neutral N-acylsphingosine amidohydrolase; AltName: Full=Neutral acylsphingosine deacylase; AltName: Full=Slug-a-bed protein; Flags: Precursor [Drosophila melanogaster]	Neutral/alkaline non-lysosomal ceramidase, N-terminal
MDBOrad1_01316	2ERKD@1|root,2SUCR@2759|Eukaryota,3AQGH@33154|Opisthokonta,3PFBY@4751|Fungi,3V6DV@5204|Basidiomycota,22B9I@155619|Agaricomycetes,3W939@5338|Agaricales	3PFBY@4751|Fungi
MDBOrad1_01317	2EJJ3@1|root,2SPQ9@2759|Eukaryota,3AMTX@33154|Opisthokonta,3PE6V@4751|Fungi,3V5EV@5204|Basidiomycota,22AAI@155619|Agaricomycetes,3W6T1@5338|Agaricales	3PE6V@4751|Fungi		TEA/ATTS domain
MDBOrad1_01318	2EB2H@1|root,2SH83@2759|Eukaryota,3AHHF@33154|Opisthokonta,3PB7Y@4751|Fungi,3V50C@5204|Basidiomycota,2299A@155619|Agaricomycetes	3PB7Y@4751|Fungi
MDBOrad1_01319	COG0656@1|root,KOG1577@2759|Eukaryota,38HH0@33154|Opisthokonta,3NV0A@4751|Fungi,3V4SF@5204|Basidiomycota,2265E@155619|Agaricomycetes	3NV0A@4751|Fungi	RecName: Full=Probable NAD(P)H-dependent D-xylose reductase xyl1; Short=XR [Aspergillus nidulans FGSC A4]	Aldo/keto reductase family
MDBOrad1_01320	COG1893@1|root,2QPT5@2759|Eukaryota,39W61@33154|Opisthokonta,3NY0S@4751|Fungi,3V1A4@5204|Basidiomycota,226ZG@155619|Agaricomycetes,3W55C@5338|Agaricales	3NY0S@4751|Fungi		Ketopantoate reductase PanE/ApbA
MDBOrad1_01321	2EG6S@1|root,2SM7G@2759|Eukaryota,3AFAU@33154|Opisthokonta,3PCS5@4751|Fungi,3V2BB@5204|Basidiomycota,2284I@155619|Agaricomycetes,3W3MN@5338|Agaricales	3PCS5@4751|Fungi		GDP-fucose protein O-fucosyltransferase		1
MDBOrad1_01322	KOG1442@1|root,KOG1442@2759|Eukaryota,38BNG@33154|Opisthokonta,3PAI2@4751|Fungi,3V3VQ@5204|Basidiomycota,2251C@155619|Agaricomycetes,3W2ZS@5338|Agaricales	3PAI2@4751|Fungi		Triose-phosphate Transporter family		7
MDBOrad1_01323	2EAA9@1|root,2SGIR@2759|Eukaryota,39WM0@33154|Opisthokonta,3P89N@4751|Fungi,3V2QC@5204|Basidiomycota,22EE0@155619|Agaricomycetes	3P89N@4751|Fungi
MDBOrad1_01324	COG5210@1|root,KOG2223@2759|Eukaryota,38BKA@33154|Opisthokonta,3NZ9T@4751|Fungi,3UY4G@5204|Basidiomycota,226HE@155619|Agaricomycetes,3W4FI@5338|Agaricales	3NZ9T@4751|Fungi	RecName: Full=Drainin; AltName: Full=TBC1 domain family member 12 homolog [Dictyostelium discoideum]	Rab-GTPase-TBC domain
MDBOrad1_01325	2E5YN@1|root,2SCQC@2759|Eukaryota,3ABY3@33154|Opisthokonta,3P9JS@4751|Fungi,3V35J@5204|Basidiomycota,22AZX@155619|Agaricomycetes	3P9JS@4751|Fungi
MDBOrad1_01326	COG2036@1|root,KOG3467@2759|Eukaryota,3A1HI@33154|Opisthokonta,3P3ZX@4751|Fungi,3V1EP@5204|Basidiomycota,229JB@155619|Agaricomycetes,3H52M@355688|Agaricomycetes incertae sedis	3P3ZX@4751|Fungi	RecName: Full=Histone H4 [Phanerodontia chrysosporium]_x0001_P62793.2 RecName: Full=Histone H4 [Agaricus bisporus]	Centromere kinetochore component CENP-T histone fold
MDBOrad1_01327	COG0526@1|root,KOG0907@2759|Eukaryota,3A886@33154|Opisthokonta,3P5A0@4751|Fungi,3V2Q4@5204|Basidiomycota,229AD@155619|Agaricomycetes,3H51I@355688|Agaricomycetes incertae sedis	3P5A0@4751|Fungi	RecName: Full=Peptide-N(4)-(N-acetyl-beta-glucosaminyl)asparagine amidase; AltName: Full=Peptide:N-glycanase; Short=PNGase [Caenorhabditis elegans]	Thioredoxin		1
MDBOrad1_01328	2EIB7@1|root,2SNSJ@2759|Eukaryota,3AKGZ@33154|Opisthokonta,3PDJ9@4751|Fungi,3V57V@5204|Basidiomycota,225S9@155619|Agaricomycetes,3W7CP@5338|Agaricales	3PDJ9@4751|Fungi		Double-stranded RNA binding motif
MDBOrad1_01329	28HU9@1|root,2QQ5B@2759|Eukaryota,38BJ9@33154|Opisthokonta,3NU01@4751|Fungi,3UZKG@5204|Basidiomycota,226A6@155619|Agaricomycetes,3W3B9@5338|Agaricales	3NU01@4751|Fungi	RecName: Full=Nucleoporin pom152 [Schizosaccharomyces pombe 972h-]			2
MDBOrad1_01330	COG0221@1|root,KOG1626@2759|Eukaryota,38CDN@33154|Opisthokonta,3NUSR@4751|Fungi,3UY11@5204|Basidiomycota,225BW@155619|Agaricomycetes,3W653@5338|Agaricales	3NUSR@4751|Fungi	RecName: Full=Inorganic pyrophosphatase; AltName: Full=Pyrophosphate phospho-hydrolase; Short=PPase [Debaryomyces hansenii CBS767]	Inorganic pyrophosphatase
MDBOrad1_01331	KOG2065@1|root,KOG2065@2759|Eukaryota,3999D@33154|Opisthokonta,3NX1H@4751|Fungi,3V2IV@5204|Basidiomycota,2257B@155619|Agaricomycetes,3W40H@5338|Agaricales	3NX1H@4751|Fungi	RecName: Full=Alpha-1,2-mannosyltransferase ALG9; AltName: Full=Asparagine-linked glycosylation protein 9 homolog; AltName: Full=Disrupted in bipolar disorder protein 1; AltName: Full=Dol-P-Man:Man(6)GlcNAc(2)-PP-Dol alpha-1,2-mannosyltransferase; AltName: Full=Dol-P-Man:Man(8)GlcNAc(2)-PP-Dol alpha-1,2-mannosyltransferase [Homo sapiens]	Alg9-like mannosyltransferase family		8
MDBOrad1_01332	2E6EU@1|root,2SD4S@2759|Eukaryota,3ADJQ@33154|Opisthokonta,3P8JF@4751|Fungi,3V33P@5204|Basidiomycota,2282Q@155619|Agaricomycetes,3W4MI@5338|Agaricales	3P8JF@4751|Fungi				4
MDBOrad1_01333	2CAZ1@1|root,2SC4D@2759|Eukaryota,3A9YJ@33154|Opisthokonta,3PIBI@4751|Fungi,3V6P5@5204|Basidiomycota,229E9@155619|Agaricomycetes,3W760@5338|Agaricales	3PIBI@4751|Fungi		F-box-like
MDBOrad1_01334	COG2234@1|root,KOG2194@2759|Eukaryota,38F29@33154|Opisthokonta,3NV70@4751|Fungi,3V48J@5204|Basidiomycota,227M3@155619|Agaricomycetes,3W5Y8@5338|Agaricales	3NV70@4751|Fungi	RecName: Full=Vacuolar membrane protease; AltName: Full=FXNA-related family protease 1 [Schizophyllum commune H4-8]	Peptidase family M28		9
MDBOrad1_01335	COG3142@1|root,KOG4013@2759|Eukaryota,39V2G@33154|Opisthokonta,3P4B3@4751|Fungi,3V2RJ@5204|Basidiomycota,229K5@155619|Agaricomycetes,3W7JE@5338|Agaricales	3P4B3@4751|Fungi	RecName: Full=PF03932 family protein CutC [Shigella dysenteriae Sd197]	CutC family
MDBOrad1_01336	COG1398@1|root,KOG1600@2759|Eukaryota,39WS0@33154|Opisthokonta,3P0PQ@4751|Fungi,3UZ44@5204|Basidiomycota,2260A@155619|Agaricomycetes,3H2EV@355688|Agaricomycetes incertae sedis	3P0PQ@4751|Fungi	RecName: Full=Acyl-CoA desaturase; AltName: Full=Delta(9)-desaturase; Short=Delta-9 desaturase; AltName: Full=Fatty acid desaturase; AltName: Full=Stearoyl-CoA desaturase [Histoplasma capsulatum]	Fatty acid desaturase		5
MDBOrad1_01337	COG5076@1|root,KOG1827@2759|Eukaryota,3A4CE@33154|Opisthokonta,3Q3ST@4751|Fungi,3V1C7@5204|Basidiomycota,224TR@155619|Agaricomycetes,3W5YT@5338|Agaricales	3Q3ST@4751|Fungi	RecName: Full=SWI/SNF chromatin-remodeling complex subunit snf22; AltName: Full=ATP-dependent helicase snf22; AltName: Full=SWI/SNF complex subunit snf22 [Schizosaccharomyces pombe 972h-]	Bromodomain
MDBOrad1_01338	COG0270@1|root,2QPKK@2759|Eukaryota,38HV9@33154|Opisthokonta,3Q47V@4751|Fungi,3V3KS@5204|Basidiomycota,22EK6@155619|Agaricomycetes	3Q47V@4751|Fungi	RecName: Full=DNA (cytosine-5)-methyltransferase PliMCI; AltName: Full=DNA methyltransferase PliMCI; Short=DNA MTase PliMCI; Short=M.PliMCI; AltName: Full=Dnmt1; AltName: Full=MCMT [Paracentrotus lividus]	C-5 cytosine-specific DNA methylase
MDBOrad1_01339	COG3603@1|root,2S7H6@2759|Eukaryota,3A8N4@33154|Opisthokonta,3P79H@4751|Fungi,3V2IB@5204|Basidiomycota,22AD4@155619|Agaricomycetes,3W8DT@5338|Agaricales	3P79H@4751|Fungi		ACT domain
MDBOrad1_01340	2E6HZ@1|root,2SD7H@2759|Eukaryota,3ABGC@33154|Opisthokonta,3P8V7@4751|Fungi,3V2S4@5204|Basidiomycota,2272P@155619|Agaricomycetes	3P8V7@4751|Fungi
MDBOrad1_01341
MDBOrad1_01342	COG5273@1|root,KOG1315@2759|Eukaryota,39KKR@33154|Opisthokonta,3Q502@4751|Fungi,3UYT4@5204|Basidiomycota,2266Z@155619|Agaricomycetes,3W3IU@5338|Agaricales	3Q502@4751|Fungi	RecName: Full=Palmitoyltransferase PFA4; AltName: Full=Protein S-acyltransferase; Short=PAT; AltName: Full=Protein fatty acyltransferase 4 [Cryptococcus neoformans var. grubii H99]			1
MDBOrad1_01343
MDBOrad1_01344	2CYCF@1|root,2S3JE@2759|Eukaryota,3A7B2@33154|Opisthokonta,3P5TI@4751|Fungi,3V21W@5204|Basidiomycota,228R8@155619|Agaricomycetes,3H3AT@355688|Agaricomycetes incertae sedis	3P5TI@4751|Fungi
MDBOrad1_01345	KOG1642@1|root,KOG1642@2759|Eukaryota,38KSQ@33154|Opisthokonta,3NV66@4751|Fungi,3V10X@5204|Basidiomycota,228RW@155619|Agaricomycetes,3W8XV@5338|Agaricales	3NV66@4751|Fungi	RecName: Full=Ribonuclease Le2; Short=RNase Le2 [Lentinula edodes]	Ribonuclease T2 family	SP(Sec/SPI)		yes
MDBOrad1_01346	COG1297@1|root,2QUDW@2759|Eukaryota,38HWW@33154|Opisthokonta,3NXS7@4751|Fungi,3V05X@5204|Basidiomycota,228P2@155619|Agaricomycetes,3W5BX@5338|Agaricales	3NXS7@4751|Fungi	RecName: Full=Putative oligopeptide transporter YGL114W [Saccharomyces cerevisiae S288C]	OPT oligopeptide transporter protein		14
MDBOrad1_01347	KOG2236@1|root,KOG2236@2759|Eukaryota,38EWH@33154|Opisthokonta,3NY8R@4751|Fungi,3V1KU@5204|Basidiomycota,228TR@155619|Agaricomycetes,3W3ZU@5338|Agaricales	3NY8R@4751|Fungi	RecName: Full=H/ACA ribonucleoprotein complex non-core subunit NAF1; AltName: Full=Nuclear assembly factor 1 [Schizosaccharomyces pombe 972h-]	Gar1/Naf1 RNA binding region
MDBOrad1_01348	COG0264@1|root,KOG1071@2759|Eukaryota,38FEV@33154|Opisthokonta,3P2RA@4751|Fungi,3VBXF@5204|Basidiomycota,22F0Q@155619|Agaricomycetes,3W9ZW@5338|Agaricales	3P2RA@4751|Fungi	RecName: Full=Elongation factor Ts, mitochondrial; Short=EF-Ts; Short=EF-TsMt; Flags: Precursor [Laccaria bicolor S238N-H82]	Elongation factor TS
MDBOrad1_01349	KOG2329@1|root,KOG2329@2759|Eukaryota,39U88@33154|Opisthokonta,3NV52@4751|Fungi,3V0UB@5204|Basidiomycota,226BK@155619|Agaricomycetes,3W527@5338|Agaricales	3NV52@4751|Fungi	RecName: Full=Alkaline ceramidase 3; Short=AlkCDase 3; Short=Alkaline CDase 3; AltName: Full=Alkaline phytoceramidase; Short=aPHC [Mus musculus]	Ceramidase		6
MDBOrad1_01350						1
MDBOrad1_01351	2CSMV@1|root,2RCFU@2759|Eukaryota,3AEG9@33154|Opisthokonta,3PD1E@4751|Fungi,3V3ZW@5204|Basidiomycota,228F9@155619|Agaricomycetes,3H70J@355688|Agaricomycetes incertae sedis	3PD1E@4751|Fungi
MDBOrad1_01352	COG0612@1|root,KOG2067@2759|Eukaryota,38BUY@33154|Opisthokonta,3NV1J@4751|Fungi,3UYW5@5204|Basidiomycota,227CA@155619|Agaricomycetes,3W5EY@5338|Agaricales	3NV1J@4751|Fungi	RecName: Full=Mitochondrial-processing peptidase subunit alpha; AltName: Full=Alpha-MPP; AltName: Full=Inactive zinc metalloprotease alpha; AltName: Full=Matrix processing peptidase; Flags: Precursor [Neurospora crassa OR74A]	Insulinase (Peptidase family M16)
MDBOrad1_01353	KOG4751@1|root,KOG4751@2759|Eukaryota,38E5R@33154|Opisthokonta,3NW70@4751|Fungi,3UYJR@5204|Basidiomycota,226ZX@155619|Agaricomycetes,3W344@5338|Agaricales	3NW70@4751|Fungi	RecName: Full=Breast cancer type 2 susceptibility protein homolog; AltName: Full=Fanconi anemia group D1 protein homolog [Rattus norvegicus]	BRCA2, oligonucleotide/oligosaccharide-binding, domain 1
MDBOrad1_01354	COG1791@1|root,KOG2107@2759|Eukaryota,3A1M2@33154|Opisthokonta,3P21X@4751|Fungi,3V0QF@5204|Basidiomycota,228XX@155619|Agaricomycetes,3H4Q9@355688|Agaricomycetes incertae sedis	3P21X@4751|Fungi	RecName: Full=1,2-dihydroxy-3-keto-5-methylthiopentene dioxygenase 1; AltName: Full=Acireductone dioxygenase (Fe(2+)-requiring) 1; Short=ARD 1; Short=Fe-ARD 1 [Coprinopsis cinerea okayama7#130]	ARD/ARD' family
MDBOrad1_01355	KOG1850@1|root,KOG1850@2759|Eukaryota,38IAQ@33154|Opisthokonta,3P0JU@4751|Fungi,3V4BG@5204|Basidiomycota,22874@155619|Agaricomycetes	3P0JU@4751|Fungi		Myosin-like coiled-coil protein
MDBOrad1_01356	COG4284@1|root,KOG2388@2759|Eukaryota,38G4Q@33154|Opisthokonta,3NVWY@4751|Fungi,3UZP6@5204|Basidiomycota,224Z6@155619|Agaricomycetes,3W4IZ@5338|Agaricales	3NVWY@4751|Fungi	RecName: Full=UDP-N-acetylhexosamine pyrophosphorylase; Includes: RecName: Full=UDP-N-acetylgalactosamine pyrophosphorylase; Includes: RecName: Full=UDP-N-acetylglucosamine pyrophosphorylase [Mus musculus]	UTP--glucose-1-phosphate uridylyltransferase
MDBOrad1_01357	28JIA@1|root,2QRXF@2759|Eukaryota,38QAU@33154|Opisthokonta,3NV0S@4751|Fungi,3V4XG@5204|Basidiomycota,225SY@155619|Agaricomycetes,3W43G@5338|Agaricales	3NV0S@4751|Fungi		Heterokaryon incompatibility protein Het-C	SP(Sec/SPI)	1
MDBOrad1_01358	COG2730@1|root,2QPYU@2759|Eukaryota,38DPE@33154|Opisthokonta,3NV8Y@4751|Fungi,3UXUZ@5204|Basidiomycota,224BJ@155619|Agaricomycetes,3W515@5338|Agaricales	3NV8Y@4751|Fungi	RecName: Full=Glucan 1,3-beta-glucosidase; AltName: Full=Exo-1,3-beta-glucanase; Flags: Precursor [Blumeria graminis]	Cellulase (glycosyl hydrolase family 5)		1
MDBOrad1_01359	KOG0755@1|root,KOG0755@2759|Eukaryota,38FT2@33154|Opisthokonta,3NV90@4751|Fungi,3UZ0E@5204|Basidiomycota,225KN@155619|Agaricomycetes,3W4GK@5338|Agaricales	3NV90@4751|Fungi	RecName: Full=Mitochondrial oxaloacetate transport protein; AltName: Full=Mitochondrial carrier protein PMT [Saccharomyces cerevisiae S288C]	Mitochondrial carrier protein
MDBOrad1_01360	KOG2101@1|root,KOG2101@2759|Eukaryota,38C6X@33154|Opisthokonta,3NVN2@4751|Fungi,3UZVR@5204|Basidiomycota,2276R@155619|Agaricomycetes,3W3SM@5338|Agaricales	3NVN2@4751|Fungi	RecName: Full=Sorting nexin-12 [Schizosaccharomyces pombe 972h-]	PXA domain		2
MDBOrad1_01361	KOG1416@1|root,KOG1416@2759|Eukaryota,39QJG@33154|Opisthokonta,3NU3W@4751|Fungi,3UYE3@5204|Basidiomycota,225Y7@155619|Agaricomycetes,3W3B6@5338|Agaricales	3NU3W@4751|Fungi	RecName: Full=tRNA (adenine(58)-N(1))-methyltransferase non-catalytic subunit TRM6; AltName: Full=tRNA(m1A58)-methyltransferase subunit TRM6; Short=tRNA(m1A58)MTase subunit TRM6 [Cryptococcus neoformans var. neoformans JEC21]_x0001_P0CS07.1 RecName: Full=tRNA (adenine(58)-N(1))-methyltransferase non-catalytic subunit TRM6; AltName: Full=tRNA(m1A58)-methyltransferase subunit TRM6; Short=tRNA(m1A58…	Gcd10p family
MDBOrad1_01362	KOG4151@1|root,KOG4151@2759|Eukaryota,38EWU@33154|Opisthokonta,3NXD0@4751|Fungi,3V1JM@5204|Basidiomycota,227T6@155619|Agaricomycetes,3W7RW@5338|Agaricales	3NXD0@4751|Fungi	RecName: Full=Protein unc-45 homolog A; Short=Unc-45A; AltName: Full=Smooth muscle cell-associated protein 1; Short=SMAP-1 [Rattus norvegicus]	Myosin-binding striated muscle assembly central
MDBOrad1_01363	COG5022@1|root,KOG0162@2759|Eukaryota,39J88@33154|Opisthokonta,3NW13@4751|Fungi,3UZ06@5204|Basidiomycota,2256G@155619|Agaricomycetes,3W4EG@5338|Agaricales	3NW13@4751|Fungi	RecName: Full=Myosin-1; AltName: Full=Class I unconventional myosin; AltName: Full=Type I myosin [Laccaria bicolor S238N-H82]	Myosin head (motor domain)
MDBOrad1_01364	KOG2530@1|root,KOG2530@2759|Eukaryota,38CYU@33154|Opisthokonta,3NW2U@4751|Fungi,3V322@5204|Basidiomycota,224QB@155619|Agaricomycetes,3H4GR@355688|Agaricomycetes incertae sedis	3NW2U@4751|Fungi	RecName: Full=Protein DML1 [Parastagonospora nodorum SN15]	Misato Segment II tubulin-like domain
MDBOrad1_01365	COG5037@1|root,KOG4476@2759|Eukaryota,397HU@33154|Opisthokonta,3NXQ1@4751|Fungi,3V2IW@5204|Basidiomycota,2289N@155619|Agaricomycetes,3W6H1@5338|Agaricales	3NXQ1@4751|Fungi		Gti1/Pac2 family
MDBOrad1_01366	2E6PC@1|root,2SDCC@2759|Eukaryota,39WEI@33154|Opisthokonta,3P7ZF@4751|Fungi,3V2JB@5204|Basidiomycota,2298I@155619|Agaricomycetes,3W93N@5338|Agaricales	3P7ZF@4751|Fungi
MDBOrad1_01367	COG0307@1|root,KOG3310@2759|Eukaryota,391FY@33154|Opisthokonta,3NZII@4751|Fungi,3V0UN@5204|Basidiomycota,224H6@155619|Agaricomycetes,3H3TU@355688|Agaricomycetes incertae sedis	3NZII@4751|Fungi	RecName: Full=Riboflavin synthase; Short=RS [Schizosaccharomyces pombe 972h-]	Lumazine binding domain
MDBOrad1_01368					SP(Sec/SPI)	1
MDBOrad1_01369	COG1132@1|root,KOG0054@2759|Eukaryota,38DZG@33154|Opisthokonta,3NWZS@4751|Fungi,3V055@5204|Basidiomycota,22EEG@155619|Agaricomycetes,3W3D9@5338|Agaricales	3NWZS@4751|Fungi	RecName: Full=ATP-dependent bile acid permease [Saccharomyces cerevisiae S288C]	ABC transporter	SP(Sec/SPI)	12
MDBOrad1_01370	KOG0800@1|root,KOG0800@2759|Eukaryota,38F90@33154|Opisthokonta,3P567@4751|Fungi,3V1Y7@5204|Basidiomycota,22EA0@155619|Agaricomycetes,3W544@5338|Agaricales	3P567@4751|Fungi	RecName: Full=E3 ubiquitin-protein ligase Iruka [Drosophila melanogaster]	Ring finger domain
MDBOrad1_01371	KOG1339@1|root,KOG1339@2759|Eukaryota,39ZWM@33154|Opisthokonta,3NXD8@4751|Fungi,3V397@5204|Basidiomycota,224JM@155619|Agaricomycetes,3H1ZH@355688|Agaricomycetes incertae sedis	3NXD8@4751|Fungi	RecName: Full=Polyporopepsin; AltName: Full=Aspartic proteinase [Irpex lacteus]	Eukaryotic aspartyl protease	SP(Sec/SPI)		yes
MDBOrad1_01372	KOG1339@1|root,KOG1339@2759|Eukaryota,39ZWM@33154|Opisthokonta,3NXD8@4751|Fungi,3V397@5204|Basidiomycota,224JM@155619|Agaricomycetes,3H1ZH@355688|Agaricomycetes incertae sedis	3NXD8@4751|Fungi	RecName: Full=Polyporopepsin; AltName: Full=Aspartic proteinase [Irpex lacteus]	Eukaryotic aspartyl protease	SP(Sec/SPI)		yes
MDBOrad1_01373	COG0596@1|root,2S36V@2759|Eukaryota,3A47T@33154|Opisthokonta,3P4AN@4751|Fungi,3V18M@5204|Basidiomycota	3P4AN@4751|Fungi
MDBOrad1_01374
MDBOrad1_01375	COG0688@1|root,KOG2419@2759|Eukaryota,39VNP@33154|Opisthokonta,3NYAE@4751|Fungi,3V8N5@5204|Basidiomycota,22DAW@155619|Agaricomycetes,3W8SX@5338|Agaricales	3NYAE@4751|Fungi	RecName: Full=L-tryptophan decarboxylase; AltName: Full=Psilocybin biosynthesis decarboxylase [Psilocybe cubensis]	Phosphatidylserine decarboxylase
MDBOrad1_01376	2D08K@1|root,2SD6Y@2759|Eukaryota,3ACFB@33154|Opisthokonta,3Q51R@4751|Fungi,3V33N@5204|Basidiomycota,225EE@155619|Agaricomycetes,3W3MM@5338|Agaricales	3Q51R@4751|Fungi
MDBOrad1_01377	KOG3870@1|root,KOG3870@2759|Eukaryota,38G0A@33154|Opisthokonta,3NVVV@4751|Fungi,3UY9T@5204|Basidiomycota,225KT@155619|Agaricomycetes,3W4K3@5338|Agaricales	3NVVV@4751|Fungi	RecName: Full=Damage-control phosphatase SPAC806.04c; AltName: Full=Sugar phosphate phosphatase SPAC806.04c [Schizosaccharomyces pombe 972h-]	Damage-control phosphatase ARMT1-like domain
MDBOrad1_01378	KOG0021@1|root,KOG0021@2759|Eukaryota,38D2F@33154|Opisthokonta,3NU0F@4751|Fungi,3UYPD@5204|Basidiomycota,22542@155619|Agaricomycetes,3H0JR@355688|Agaricomycetes incertae sedis	3NU0F@4751|Fungi	RecName: Full=Glutathione synthetase; Short=GSH synthetase; Short=GSH-S; AltName: Full=Glutathione synthase [Bos taurus]	Eukaryotic glutathione synthase, ATP binding domain
MDBOrad1_01379	2EFCJ@1|root,2SKJS@2759|Eukaryota,3A1VJ@33154|Opisthokonta,3NZGU@4751|Fungi,3V4BX@5204|Basidiomycota,226GD@155619|Agaricomycetes,3W8Z5@5338|Agaricales	3NZGU@4751|Fungi		Glycoside hydrolase 131 catalytic N-terminal domain	SP(Sec/SPI)		yes
MDBOrad1_01380	COG0547@1|root,KOG1438@2759|Eukaryota,38E82@33154|Opisthokonta,3NWSM@4751|Fungi,3UZUP@5204|Basidiomycota,226NF@155619|Agaricomycetes,3H2EZ@355688|Agaricomycetes incertae sedis	3NWSM@4751|Fungi	RecName: Full=Anthranilate phosphoribosyltransferase [Schizosaccharomyces pombe 972h-]	Glycosyl transferase family, a/b domain
MDBOrad1_01381	KOG1983@1|root,KOG1983@2759|Eukaryota,38EXY@33154|Opisthokonta,3NU4G@4751|Fungi,3UYYJ@5204|Basidiomycota,2281Z@155619|Agaricomycetes,3W3A6@5338|Agaricales	3NU4G@4751|Fungi	RecName: Full=Lethal(2) giant larvae protein homolog SRO77; AltName: Full=Sodium protection protein 2; AltName: Full=Suppressor of RHO3 protein 77 [Saccharomyces cerevisiae S288C]	Lethal giant larvae(Lgl) like, C-terminal
MDBOrad1_01382	COG0657@1|root,KOG1515@2759|Eukaryota,38TM9@33154|Opisthokonta,3P0ZA@4751|Fungi,3UZ4H@5204|Basidiomycota,225KY@155619|Agaricomycetes,3W6QG@5338|Agaricales	3P0ZA@4751|Fungi	RecName: Full=Esterase [Acinetobacter venetianus RAG-1 = CIP 110063]	alpha/beta hydrolase fold
MDBOrad1_01383	2CA3Z@1|root,2S37S@2759|Eukaryota,3A3ZC@33154|Opisthokonta,3P50V@4751|Fungi,3V13P@5204|Basidiomycota,228X1@155619|Agaricomycetes,3W779@5338|Agaricales	3P50V@4751|Fungi
MDBOrad1_01384	KOG3208@1|root,KOG3208@2759|Eukaryota,3984V@33154|Opisthokonta,3NV2S@4751|Fungi,3V1JB@5204|Basidiomycota,227AT@155619|Agaricomycetes,3W356@5338|Agaricales	3NV2S@4751|Fungi	RecName: Full=Golgi SNAP receptor complex member 1-2; AltName: Full=Golgi SNARE 12 protein; Short=AtGOS12 [Arabidopsis thaliana]	Snare region anchored in the vesicle membrane C-terminus		1
MDBOrad1_01385
MDBOrad1_01386	COG0084@1|root,KOG3020@2759|Eukaryota,38HGE@33154|Opisthokonta,3NY4H@4751|Fungi,3V0WR@5204|Basidiomycota,225GI@155619|Agaricomycetes	3NY4H@4751|Fungi	RecName: Full=Cut9-interacting protein scn1 [Schizosaccharomyces pombe 972h-]	TatD related DNase
MDBOrad1_01387	KOG0751@1|root,KOG0751@2759|Eukaryota,38F3Y@33154|Opisthokonta,3NUHH@4751|Fungi,3UY46@5204|Basidiomycota,225XB@155619|Agaricomycetes,3W6M6@5338|Agaricales	3NUHH@4751|Fungi	RecName: Full=tRNA (guanine(37)-N1)-methyltransferase; AltName: Full=M1G-methyltransferase; AltName: Full=tRNA [GM37] methyltransferase; AltName: Full=tRNA methyltransferase 5 [Coprinopsis cinerea okayama7#130]	Met-10+ like-protein
MDBOrad1_01388	COG2896@1|root,KOG2876@2759|Eukaryota,38F0A@33154|Opisthokonta,3NV9S@4751|Fungi,3UZJ6@5204|Basidiomycota,2263U@155619|Agaricomycetes,3W60J@5338|Agaricales	3NV9S@4751|Fungi	RecName: Full=Molybdenum cofactor biosynthesis protein 1; Includes: RecName: Full=GTP 3',8-cyclase; AltName: Full=Molybdenum cofactor biosynthesis protein A; Includes: RecName: Full=Cyclic pyranopterin monophosphate synthase; AltName: Full=Molybdenum cofactor biosynthesis protein C [Mus musculus]	MoaC family
MDBOrad1_01389	29UZE@1|root,2RXJV@2759|Eukaryota,3A155@33154|Opisthokonta,3P1U9@4751|Fungi,3V0GN@5204|Basidiomycota,22934@155619|Agaricomycetes,3H4T3@355688|Agaricomycetes incertae sedis	3P1U9@4751|Fungi
MDBOrad1_01390	28PD6@1|root,2QW0K@2759|Eukaryota,38C4V@33154|Opisthokonta,3NWSV@4751|Fungi,3V3QT@5204|Basidiomycota,225DD@155619|Agaricomycetes	3NWSV@4751|Fungi	RecName: Full=Protein NipSnap homolog 2; Short=NipSnap2; AltName: Full=Glioblastoma-amplified sequence [Danio rerio]	Fungal specific transcription factor domain
MDBOrad1_01391	COG5025@1|root,KOG2294@2759|Eukaryota,3AFUQ@33154|Opisthokonta,3PAX1@4751|Fungi,3V3MN@5204|Basidiomycota,22865@155619|Agaricomycetes,3W4ZA@5338|Agaricales	3PAX1@4751|Fungi	RecName: Full=Forkhead box protein J3 [Mus musculus]	Forkhead domain
MDBOrad1_01392	KOG0319@1|root,KOG0319@2759|Eukaryota,38BUJ@33154|Opisthokonta,3NUNT@4751|Fungi,3UYZJ@5204|Basidiomycota,224UQ@155619|Agaricomycetes,3W3Z4@5338|Agaricales	3NUNT@4751|Fungi	RecName: Full=Transducin beta-like protein 3 [Bos taurus]	WD domain, G-beta repeat
MDBOrad1_01393	COG0115@1|root,2QQMK@2759|Eukaryota,3A3BT@33154|Opisthokonta,3P2UR@4751|Fungi,3V2M3@5204|Basidiomycota,22AHM@155619|Agaricomycetes,3W7TQ@5338|Agaricales	3P2UR@4751|Fungi		Amino-transferase class IV
MDBOrad1_01394	COG5184@1|root,KOG4351@1|root,KOG1426@2759|Eukaryota,KOG4351@2759|Eukaryota,39JVV@33154|Opisthokonta,3Q484@4751|Fungi,3V7DN@5204|Basidiomycota,22FG0@155619|Agaricomycetes,3W545@5338|Agaricales	3Q484@4751|Fungi	RecName: Full=Protein ILRUN; AltName: Full=Inflammation and lipid regulator with UBA-like and NBR1-like domains protein [Homo sapiens]	Ig-like domain from next to BRCA1 gene
MDBOrad1_01395	COG3542@1|root,2RCWJ@2759|Eukaryota,3A25K@33154|Opisthokonta,3P2Y2@4751|Fungi,3V1ZT@5204|Basidiomycota,2291E@155619|Agaricomycetes,3H4W6@355688|Agaricomycetes incertae sedis	3P2Y2@4751|Fungi	RecName: Full=Uncharacterized protein YML079W [Saccharomyces cerevisiae S288C]	Cupin superfamily (DUF985)
MDBOrad1_01396	COG3542@1|root,2RCWJ@2759|Eukaryota,3A25K@33154|Opisthokonta,3P2Y2@4751|Fungi,3V1ZT@5204|Basidiomycota,2291E@155619|Agaricomycetes,3H4W6@355688|Agaricomycetes incertae sedis	3P2Y2@4751|Fungi	RecName: Full=Uncharacterized protein YML079W [Saccharomyces cerevisiae S288C]	Cupin superfamily (DUF985)
MDBOrad1_01397	KOG2398@1|root,KOG2398@2759|Eukaryota,39SSY@33154|Opisthokonta,3NVT9@4751|Fungi,3UY8T@5204|Basidiomycota,22753@155619|Agaricomycetes,3W39Q@5338|Agaricales	3NVT9@4751|Fungi	RecName: Full=Cell division control protein 15 [Schizosaccharomyces pombe 972h-]	Fes/CIP4, and EFC/F-BAR homology domain
MDBOrad1_01398	2E2BV@1|root,2S9JT@2759|Eukaryota,3A4V7@33154|Opisthokonta,3P363@4751|Fungi,3V6TM@5204|Basidiomycota,229QB@155619|Agaricomycetes,3W7M9@5338|Agaricales	3P363@4751|Fungi		Nnf1
MDBOrad1_01399	2E8C1@1|root,2SEUW@2759|Eukaryota,3AC2E@33154|Opisthokonta,3P8F3@4751|Fungi,3V2WI@5204|Basidiomycota,229BW@155619|Agaricomycetes,3H5AG@355688|Agaricomycetes incertae sedis	3P8F3@4751|Fungi		RhoGEF domain
MDBOrad1_01400	COG0657@1|root,KOG1515@2759|Eukaryota,38TM9@33154|Opisthokonta,3P0ZA@4751|Fungi,3UZ4H@5204|Basidiomycota,225KY@155619|Agaricomycetes,3W6QG@5338|Agaricales	3P0ZA@4751|Fungi	RecName: Full=Esterase [Acinetobacter venetianus RAG-1 = CIP 110063]	alpha/beta hydrolase fold
MDBOrad1_01401	COG0024@1|root,KOG2775@2759|Eukaryota,38BDD@33154|Opisthokonta,3NUPF@4751|Fungi,3UZ8N@5204|Basidiomycota,224BU@155619|Agaricomycetes	3NUPF@4751|Fungi	RecName: Full=Methionine aminopeptidase 2; Short=MAP 2; Short=MetAP 2; AltName: Full=Peptidase M [Schizophyllum commune H4-8]	Metallopeptidase family M24		4
MDBOrad1_01402	COG1643@1|root,KOG0922@2759|Eukaryota,38C5G@33154|Opisthokonta,3NVRX@4751|Fungi,3V00F@5204|Basidiomycota,227K2@155619|Agaricomycetes,3W5Y2@5338|Agaricales	3NVRX@4751|Fungi	RecName: Full=Pre-mRNA-splicing factor ATP-dependent RNA helicase prp22 [Schizosaccharomyces pombe 972h-]	Oligonucleotide/oligosaccharide-binding (OB)-fold
MDBOrad1_01403	KOG4353@1|root,KOG4353@2759|Eukaryota,39ZX2@33154|Opisthokonta,3P6R5@4751|Fungi,3VC21@5204|Basidiomycota,22F4Z@155619|Agaricomycetes,3WA0M@5338|Agaricales	3P6R5@4751|Fungi		Nuclear transport factor 2 (NTF2) domain
MDBOrad1_01404	COG1643@1|root,KOG0920@2759|Eukaryota,38B5Q@33154|Opisthokonta,3NWAW@4751|Fungi,3UXUE@5204|Basidiomycota,227JW@155619|Agaricomycetes,3W3PD@5338|Agaricales	3NWAW@4751|Fungi	RecName: Full=Putative DEAH-box ATP-dependent helicase UM11114 [Ustilago maydis 521]	Helicase associated domain (HA2)
MDBOrad1_01405
MDBOrad1_01406	2D2TW@1|root,2SP06@2759|Eukaryota,3AKKB@33154|Opisthokonta,3PDU8@4751|Fungi,3V5DR@5204|Basidiomycota,22C21@155619|Agaricomycetes,3W930@5338|Agaricales	3PDU8@4751|Fungi			SP(Sec/SPI)		yes
MDBOrad1_01407	296PC@1|root,2RDNH@2759|Eukaryota,3972Z@33154|Opisthokonta,3NXJC@4751|Fungi,3V9GB@5204|Basidiomycota,22BW1@155619|Agaricomycetes	3NXJC@4751|Fungi	RecName: Full=Lipid-translocating exporter-like protein RTA1; AltName: Full=Phomenoic acid biosynthesis cluster protein RTA1 [Leptosphaeria maculans JN3]	RTA1 like protein		7
MDBOrad1_01408	KOG0254@1|root,KOG0254@2759|Eukaryota,38CRV@33154|Opisthokonta,3NUD0@4751|Fungi,3UY49@5204|Basidiomycota,224BY@155619|Agaricomycetes,3W5W6@5338|Agaricales	3NUD0@4751|Fungi	RecName: Full=Siderophore iron transporter 1 [Aspergillus fumigatus Af293]			14
MDBOrad1_01409	KOG4760@1|root,KOG4760@2759|Eukaryota,38GGP@33154|Opisthokonta,3P0J7@4751|Fungi,3V23W@5204|Basidiomycota,22E7Y@155619|Agaricomycetes	3P0J7@4751|Fungi	RecName: Full=Exonuclease V; Short=Exo V; Short=hExo5; AltName: Full=Defects in morphology protein 1 homolog [Homo sapiens]	Exonuclease V - a 5' deoxyribonuclease		1
MDBOrad1_01410	KOG1989@1|root,KOG1989@2759|Eukaryota,38GVM@33154|Opisthokonta,3NW5N@4751|Fungi,3UYEN@5204|Basidiomycota,2257E@155619|Agaricomycetes,3W5KY@5338|Agaricales	3NW5N@4751|Fungi	RecName: Full=Actin-regulating kinase 1 [Saccharomyces cerevisiae S288C]	Protein kinase domain
MDBOrad1_01411	COG2084@1|root,KOG0409@2759|Eukaryota,38BFD@33154|Opisthokonta,3NV5P@4751|Fungi,3V04P@5204|Basidiomycota,2263A@155619|Agaricomycetes,3W3PJ@5338|Agaricales	3NV5P@4751|Fungi	RecName: Full=Probable 3-hydroxyisobutyrate dehydrogenase, mitochondrial; Short=HIBADH; Flags: Precursor [Arabidopsis thaliana]	NAD binding domain of 6-phosphogluconate dehydrogenase
MDBOrad1_01412	COG0251@1|root,KOG2317@2759|Eukaryota,3AMSD@33154|Opisthokonta,3PEAZ@4751|Fungi,3V5N7@5204|Basidiomycota,22F1B@155619|Agaricomycetes	3PEAZ@4751|Fungi	RecName: Full=2-iminobutanoate/2-iminopropanoate deaminase; AltName: Full=Enamine/imine deaminase [Pyrococcus furiosus DSM 3638]	Endoribonuclease L-PSP
MDBOrad1_01413	COG0537@1|root,KOG3379@2759|Eukaryota,3A1SB@33154|Opisthokonta,3P449@4751|Fungi,3V20N@5204|Basidiomycota,229J8@155619|Agaricomycetes,3W72D@5338|Agaricales	3P449@4751|Fungi	RecName: Full=Bis(5'-nucleosyl)-tetraphosphatase [asymmetrical]; AltName: Full=Diadenosine 5',5'''-P1,P4-tetraphosphate asymmetrical hydrolase; Short=Ap4A hydrolase; Short=Ap4Aase; Short=Diadenosine tetraphosphatase [Schizosaccharomyces pombe 972h-]	HIT domain
MDBOrad1_01414	COG0654@1|root,KOG2614@2759|Eukaryota,39R6R@33154|Opisthokonta,3NY33@4751|Fungi,3V0X3@5204|Basidiomycota,229HA@155619|Agaricomycetes,3W5FT@5338|Agaricales	3NY33@4751|Fungi	RecName: Full=Salicylate hydroxylase; AltName: Full=Salicylate 1-monooxygenase [Pseudomonas putida]	FAD binding domain
MDBOrad1_01415	COG0654@1|root,KOG2614@2759|Eukaryota,39R6R@33154|Opisthokonta,3NY33@4751|Fungi,3V0X3@5204|Basidiomycota,229HA@155619|Agaricomycetes,3W5FT@5338|Agaricales	3NY33@4751|Fungi	RecName: Full=Salicylate hydroxylase; AltName: Full=Salicylate 1-monooxygenase [Pseudomonas putida]	FAD binding domain		1
MDBOrad1_01416						1
MDBOrad1_01417						1
MDBOrad1_01418	2CJ7K@1|root,2RZSZ@2759|Eukaryota,39KMS@33154|Opisthokonta,3Q512@4751|Fungi,3V0SS@5204|Basidiomycota,225JH@155619|Agaricomycetes,3W50S@5338|Agaricales	3Q512@4751|Fungi		SUR7/PalI family		4
MDBOrad1_01419	COG0010@1|root,KOG2964@2759|Eukaryota,38BX2@33154|Opisthokonta,3NUEG@4751|Fungi,3UY89@5204|Basidiomycota,225RJ@155619|Agaricomycetes,3W3XW@5338|Agaricales	3NUEG@4751|Fungi	RecName: Full=Putative agmatinase 1; AltName: Full=Agmatine ureohydrolase 1; Short=AUH 1; Flags: Precursor [Schizosaccharomyces pombe 972h-]	Arginase family	SP(Sec/SPI)		yes
MDBOrad1_01420	KOG0266@1|root,KOG0266@2759|Eukaryota,39TSB@33154|Opisthokonta,3NY2P@4751|Fungi,3UXZB@5204|Basidiomycota,228A5@155619|Agaricomycetes,3W6MC@5338|Agaricales	3NY2P@4751|Fungi	RecName: Full=LEC14B homolog [Prunus armeniaca]	WD domain, G-beta repeat
MDBOrad1_01421	COG5602@1|root,KOG4204@2759|Eukaryota,38BUZ@33154|Opisthokonta,3NTW5@4751|Fungi,3UY01@5204|Basidiomycota,226DB@155619|Agaricomycetes,3W3Z8@5338|Agaricales	3NTW5@4751|Fungi	RecName: Full=Transcriptional regulatory protein SIN3 [Saccharomyces cerevisiae S288C]	C-terminal domain of Sin3a protein		1
MDBOrad1_01422	28Q2J@1|root,2QWR9@2759|Eukaryota,38WP6@33154|Opisthokonta,3PHSA@4751|Fungi,3V07J@5204|Basidiomycota,2253Q@155619|Agaricomycetes,3W42V@5338|Agaricales	3PHSA@4751|Fungi	RecName: Full=Synchronized import protein 1; AltName: Full=Symportin 1 [Saccharomyces cerevisiae S288C]
MDBOrad1_01423	2EI23@1|root,2SNK0@2759|Eukaryota,3AJMK@33154|Opisthokonta,3PD39@4751|Fungi,3V528@5204|Basidiomycota,229NI@155619|Agaricomycetes,3W6R6@5338|Agaricales	3PD39@4751|Fungi		F-box-like
MDBOrad1_01424	KOG3770@1|root,KOG3770@2759|Eukaryota,38DAR@33154|Opisthokonta,3NWV9@4751|Fungi,3V03S@5204|Basidiomycota,227KF@155619|Agaricomycetes,3W9S3@5338|Agaricales	3NWV9@4751|Fungi	RecName: Full=Sphingomyelin phosphodiesterase B; AltName: Full=Acid sphingomyelinase B; Short=aSMase B; Flags: Precursor [Dictyostelium discoideum]	Calcineurin-like phosphoesterase	SP(Sec/SPI)		yes
MDBOrad1_01425
MDBOrad1_01426	2CXS1@1|root,2RZBI@2759|Eukaryota,3A9V8@33154|Opisthokonta,3P839@4751|Fungi,3V2MP@5204|Basidiomycota,224C7@155619|Agaricomycetes,3W6IE@5338|Agaricales	3P839@4751|Fungi		Calcium-dependent channel, 7TM region, putative phosphate		11
MDBOrad1_01427	COG5158@1|root,KOG1301@2759|Eukaryota,38BSP@33154|Opisthokonta,3NXNB@4751|Fungi,3UZ0X@5204|Basidiomycota,225XR@155619|Agaricomycetes,3W6PQ@5338|Agaricales	3NXNB@4751|Fungi	RecName: Full=Protein sly1 [Schizosaccharomyces pombe 972h-]	Sec1 family
MDBOrad1_01428	KOG1630@1|root,KOG1630@2759|Eukaryota,38EBK@33154|Opisthokonta,3NV19@4751|Fungi,3V0BT@5204|Basidiomycota,228DZ@155619|Agaricomycetes,3W6M9@5338|Agaricales	3NV19@4751|Fungi	RecName: Full=Growth hormone-inducible transmembrane protein; AltName: Full=Dermal papilla-derived protein 2; AltName: Full=Mitochondrial morphology and cristae structure 1; Short=MICS1; AltName: Full=Transmembrane BAX inhibitor motif-containing protein 5; Flags: Precursor [Homo sapiens]	Inhibitor of apoptosis-promoting Bax1		6
MDBOrad1_01429	COG2319@1|root,KOG0273@2759|Eukaryota,38CDT@33154|Opisthokonta,3NXE8@4751|Fungi,3V10G@5204|Basidiomycota,227VJ@155619|Agaricomycetes,3H1MV@355688|Agaricomycetes incertae sedis	3NXE8@4751|Fungi	RecName: Full=F-box-like/WD repeat-containing protein TBL1Y; AltName: Full=Transducin beta-like protein 1Y; AltName: Full=Transducin-beta-like protein 1, Y-linked [Homo sapiens]	WD domain, G-beta repeat
MDBOrad1_01430	2EK4J@1|root,2SQ3X@2759|Eukaryota,3A7TC@33154|Opisthokonta,3P5JH@4751|Fungi,3VBKH@5204|Basidiomycota,22AJ2@155619|Agaricomycetes,3H5UP@355688|Agaricomycetes incertae sedis	3P5JH@4751|Fungi	RecName: Full=Monoterpene synthase 25; AltName: Full=Terpene cyclase 25 [Postia placenta Mad-698-R]	Trichodiene synthase (TRI5)
MDBOrad1_01431	2EK4J@1|root,2SQ3X@2759|Eukaryota,39V9P@33154|Opisthokonta,3P0DT@4751|Fungi,3V5I2@5204|Basidiomycota,22ER2@155619|Agaricomycetes,3H8J3@355688|Agaricomycetes incertae sedis	3P0DT@4751|Fungi	RecName: Full=Alpha-cuprenene synthase COP6; AltName: Full=Sesquiterpene synthase COP6 [Coprinopsis cinerea okayama7#130]	Trichodiene synthase (TRI5)		1
MDBOrad1_01432	2E5HY@1|root,2SCBB@2759|Eukaryota,3ACC0@33154|Opisthokonta,3P8WZ@4751|Fungi,3V36C@5204|Basidiomycota,22DCA@155619|Agaricomycetes,3W6X4@5338|Agaricales	3P8WZ@4751|Fungi
MDBOrad1_01433	2CTCQ@1|root,2RFWF@2759|Eukaryota,39J5Q@33154|Opisthokonta,3Q3HT@4751|Fungi,3VC9R@5204|Basidiomycota,22FBK@155619|Agaricomycetes,3W9JT@5338|Agaricales	seed_ortholog@221103.XP_007849708.1|-
MDBOrad1_01434	COG0384@1|root,KOG3033@2759|Eukaryota,39RJ0@33154|Opisthokonta,3P5DT@4751|Fungi,3V5QY@5204|Basidiomycota,22DW8@155619|Agaricomycetes,3H86F@355688|Agaricomycetes incertae sedis	3P5DT@4751|Fungi	RecName: Full=Phenazine biosynthesis-like domain-containing protein 2 [Mus musculus]	Phenazine biosynthesis-like protein
MDBOrad1_01435	2EDJM@1|root,2SJ68@2759|Eukaryota,3AF20@33154|Opisthokonta,3PCK8@4751|Fungi,3V403@5204|Basidiomycota,224QD@155619|Agaricomycetes,3W6JD@5338|Agaricales	3PCK8@4751|Fungi
MDBOrad1_01436	KOG4672@1|root,KOG4672@2759|Eukaryota,38QEN@33154|Opisthokonta,3P2V4@4751|Fungi,3V0PS@5204|Basidiomycota,225WZ@155619|Agaricomycetes,3W9ZC@5338|Agaricales	3P2V4@4751|Fungi	RecName: Full=Protein saf1 [Schizosaccharomyces pombe 972h-]	WW domain binding protein 11
MDBOrad1_01437	KOG2164@1|root,KOG2164@2759|Eukaryota,38E0R@33154|Opisthokonta,3Q3K4@4751|Fungi,3V05T@5204|Basidiomycota,227PJ@155619|Agaricomycetes,3W3M8@5338|Agaricales	3Q3K4@4751|Fungi	RecName: Full=Uncharacterized RING finger protein P8B7.23 [Schizosaccharomyces pombe 972h-]
MDBOrad1_01438	28PJ5@1|root,2QW7A@2759|Eukaryota,39TEF@33154|Opisthokonta,3NYIA@4751|Fungi,3V13S@5204|Basidiomycota,225AV@155619|Agaricomycetes,3H3PU@355688|Agaricomycetes incertae sedis	3NYIA@4751|Fungi	RecName: Full=High osmolarity signaling protein SHO1; AltName: Full=Osmosensor SHO1 [Schizophyllum commune H4-8]	SH3 domain		4
MDBOrad1_01439	2EK2E@1|root,2SQ2J@2759|Eukaryota,3AP45@33154|Opisthokonta,3PENJ@4751|Fungi,3V5KN@5204|Basidiomycota,229YQ@155619|Agaricomycetes,3W7YK@5338|Agaricales	3PENJ@4751|Fungi
MDBOrad1_01440	COG1960@1|root,KOG0136@2759|Eukaryota,39K63@33154|Opisthokonta,3Q4J1@4751|Fungi,3V7I5@5204|Basidiomycota,22FMT@155619|Agaricomycetes,3H8XT@355688|Agaricomycetes incertae sedis	3Q4J1@4751|Fungi
MDBOrad1_01441	2CE4H@1|root,2S3FV@2759|Eukaryota,3A64B@33154|Opisthokonta,3P6A7@4751|Fungi,3V2H6@5204|Basidiomycota,229SF@155619|Agaricomycetes,3W86U@5338|Agaricales	3P6A7@4751|Fungi
MDBOrad1_01442	COG0664@1|root,KOG2968@2759|Eukaryota,38ERP@33154|Opisthokonta,3NU33@4751|Fungi,3V05R@5204|Basidiomycota,226A7@155619|Agaricomycetes,3W3ZN@5338|Agaricales	3NU33@4751|Fungi	RecName: Full=Lysophospholipase NTE1; AltName: Full=Intracellular phospholipase B; AltName: Full=Neuropathy target esterase homolog [Ustilago maydis 521]	Cyclic nucleotide-binding domain		2
MDBOrad1_01443
MDBOrad1_01444	2BVQX@1|root,2TMTK@2759|Eukaryota,3AC3G@33154|Opisthokonta,3P961@4751|Fungi,3V8V7@5204|Basidiomycota,22AYE@155619|Agaricomycetes,3W8C6@5338|Agaricales	3P961@4751|Fungi		YABBY protein
MDBOrad1_01445	KOG4341@1|root,KOG4341@2759|Eukaryota,38WZP@33154|Opisthokonta,3NU6P@4751|Fungi,3V10R@5204|Basidiomycota,225TM@155619|Agaricomycetes	3NU6P@4751|Fungi		F-box-like
MDBOrad1_01446					SP(Sec/SPI)		yes
MDBOrad1_01447					SP(Sec/SPI)		yes
MDBOrad1_01448	KOG4835@1|root,KOG4835@2759|Eukaryota,3A6QN@33154|Opisthokonta,3P6KF@4751|Fungi,3V20U@5204|Basidiomycota,229J6@155619|Agaricomycetes,3H58B@355688|Agaricomycetes incertae sedis	3P6KF@4751|Fungi		Sas10/Utp3/C1D family
MDBOrad1_01449	2EH6Y@1|root,2SMY0@2759|Eukaryota,39KVA@33154|Opisthokonta,3Q58X@4751|Fungi,3V539@5204|Basidiomycota,229YR@155619|Agaricomycetes	3Q58X@4751|Fungi	RecName: Full=Demethylmenaquinone methyltransferase [Chlamydia muridarum str. Nigg]	Methyltransferase domain
MDBOrad1_01450	KOG1558@1|root,KOG1558@2759|Eukaryota,39VIX@33154|Opisthokonta,3NW7M@4751|Fungi,3V1E1@5204|Basidiomycota,227HX@155619|Agaricomycetes	3NW7M@4751|Fungi	RecName: Full=DNA-dependent metalloprotease WSS1; AltName: Full=DNA damage response protein WSS1; AltName: Full=SUMO-dependent isopeptidase WSS1; AltName: Full=Weak suppressor of SMT3 protein 1 [Saccharomyces cerevisiae S288C]	WLM domain
MDBOrad1_01451	KOG2497@1|root,KOG2497@2759|Eukaryota,39S3Q@33154|Opisthokonta,3NXXF@4751|Fungi,3V1NV@5204|Basidiomycota,2299I@155619|Agaricomycetes,3H4ZR@355688|Agaricomycetes incertae sedis	3NXXF@4751|Fungi	RecName: Full=Protein-lysine N-methyltransferase EFM3; AltName: Full=Elongation factor methyltransferase 3 [Chaetomium thermophilum var. thermophilum DSM 1495]	Lysine methyltransferase
MDBOrad1_01452	2E0M8@1|root,2S81B@2759|Eukaryota,3AA1N@33154|Opisthokonta,3P6TU@4751|Fungi,3V28H@5204|Basidiomycota,229CT@155619|Agaricomycetes,3W7EQ@5338|Agaricales	3P6TU@4751|Fungi		Eukaryotic mitochondrial regulator protein
MDBOrad1_01453	COG0477@1|root,KOG2533@2759|Eukaryota,38D65@33154|Opisthokonta,3NVM3@4751|Fungi,3UZ51@5204|Basidiomycota,2286W@155619|Agaricomycetes,3W53Z@5338|Agaricales	3NVM3@4751|Fungi	RecName: Full=Uncharacterized transporter YIL166C [Saccharomyces cerevisiae S288C]	Major Facilitator Superfamily		7
MDBOrad1_01454	COG0459@1|root,KOG0361@2759|Eukaryota,38FBW@33154|Opisthokonta,3NVKZ@4751|Fungi,3UZZ7@5204|Basidiomycota,2273D@155619|Agaricomycetes,3W3QY@5338|Agaricales	3NVKZ@4751|Fungi	RecName: Full=Probable T-complex protein 1 subunit eta; Short=TCP-1-eta; AltName: Full=CCT-eta [Schizosaccharomyces pombe 972h-]	TCP-1/cpn60 chaperonin family
MDBOrad1_01455	COG0553@1|root,KOG1001@2759|Eukaryota,38E02@33154|Opisthokonta,3NURH@4751|Fungi,3UXYI@5204|Basidiomycota,227AY@155619|Agaricomycetes,3W3BX@5338|Agaricales	3NURH@4751|Fungi	RecName: Full=DNA repair protein RAD5 [Cryptococcus neoformans var. neoformans B-3501A]	SNF2-related domain
MDBOrad1_01456	KOG4778@1|root,KOG4778@2759|Eukaryota,3ADA7@33154|Opisthokonta,3P9D2@4751|Fungi,3V30P@5204|Basidiomycota,229PW@155619|Agaricomycetes,3W92X@5338|Agaricales	3P9D2@4751|Fungi		Mitochondrial ribosomal protein L28
MDBOrad1_01457
MDBOrad1_01458	COG0149@1|root,KOG1643@2759|Eukaryota,38ETQ@33154|Opisthokonta,3NW35@4751|Fungi,3UY92@5204|Basidiomycota,22814@155619|Agaricomycetes	3NW35@4751|Fungi	RecName: Full=Triosephosphate isomerase; Short=TIM; AltName: Full=Triose-phosphate isomerase [Coprinopsis cinerea okayama7#130]	Triosephosphate isomerase
MDBOrad1_01459
MDBOrad1_01460	COG0418@1|root,KOG2902@2759|Eukaryota,38HVG@33154|Opisthokonta,3NU7X@4751|Fungi,3UYBF@5204|Basidiomycota,225X7@155619|Agaricomycetes,3W3C0@5338|Agaricales	3NU7X@4751|Fungi	RecName: Full=Dihydroorotase; Short=DHOase [Ustilago maydis 521]	Amidohydrolase
MDBOrad1_01461	2D4KN@1|root,2SVH8@2759|Eukaryota,3AQ1J@33154|Opisthokonta,3PFEJ@4751|Fungi,3V6GG@5204|Basidiomycota,22BZU@155619|Agaricomycetes,3W9FM@5338|Agaricales	3PFEJ@4751|Fungi		Fungal protein kinase
MDBOrad1_01462	2D4X6@1|root,2SWKJ@2759|Eukaryota,3AUWP@33154|Opisthokonta,3PGYA@4751|Fungi,3V7A6@5204|Basidiomycota,22CD9@155619|Agaricomycetes	3PGYA@4751|Fungi		F-box-like
MDBOrad1_01463	2D4J4@1|root,2SVC6@2759|Eukaryota,3AR4H@33154|Opisthokonta,3PFTN@4751|Fungi,3V669@5204|Basidiomycota,22CGM@155619|Agaricomycetes,3W99U@5338|Agaricales	3PFTN@4751|Fungi		F-box-like
MDBOrad1_01464	COG5159@1|root,KOG1464@2759|Eukaryota,38GQV@33154|Opisthokonta,3NZ5W@4751|Fungi,3UZ6A@5204|Basidiomycota,225UA@155619|Agaricomycetes,3H23B@355688|Agaricomycetes incertae sedis	3NZ5W@4751|Fungi	RecName: Full=COP9 signalosome complex subunit 2; Short=SGN2; Short=Signalosome subunit 2; AltName: Full=Alien homolog; AltName: Full=JAB1-containing signalosome subunit 2; AltName: Full=Thyroid receptor-interacting protein 15; Short=TR-interacting protein 15; Short=TRIP-15 [Homo sapiens]_x0001_P61202.1 RecName: Full=COP9 signalosome complex subunit 2; Short=SGN2; Short=Signalosome subunit 2; Alt…	PCI domain
MDBOrad1_01465	COG5253@1|root,KOG0230@2759|Eukaryota,38BIU@33154|Opisthokonta,3NX7J@4751|Fungi,3UZ8F@5204|Basidiomycota,22709@155619|Agaricomycetes,3W4QZ@5338|Agaricales	3NX7J@4751|Fungi	RecName: Full=1-phosphatidylinositol 3-phosphate 5-kinase FAB1; Short=Phosphatidylinositol 3-phosphate 5-kinase; AltName: Full=Formation of aploid and binucleate cells protein 1; AltName: Full=Styryl dye vacuolar localization protein 7; AltName: Full=Type III PIP kinase; Short=PIPkin-III [Saccharomyces cerevisiae S288C]	Phosphatidylinositol-4-phosphate 5-Kinase
MDBOrad1_01466	COG5076@1|root,KOG1932@1|root,KOG1474@2759|Eukaryota,KOG1932@2759|Eukaryota,38BC9@33154|Opisthokonta,3NWBS@4751|Fungi,3UY1D@5204|Basidiomycota,225JD@155619|Agaricomycetes,3W3EY@5338|Agaricales	3NWBS@4751|Fungi	RecName: Full=Transcription initiation factor TFIID subunit 2; AltName: Full=TBP-associated factor 2 [Schizosaccharomyces pombe 972h-]	Bromodomain
MDBOrad1_01467	KOG2637@1|root,KOG2637@2759|Eukaryota,38FAZ@33154|Opisthokonta,3P01A@4751|Fungi,3UY31@5204|Basidiomycota,2282V@155619|Agaricomycetes,3W58B@5338|Agaricales	3P01A@4751|Fungi	RecName: Full=Protein LTV1 [Schizosaccharomyces pombe 972h-]	Low temperature viability protein
MDBOrad1_01468	2E9MY@1|root,2SFZ4@2759|Eukaryota,3AGYD@33154|Opisthokonta,3PBBW@4751|Fungi,3V44I@5204|Basidiomycota,2284W@155619|Agaricomycetes,3W7CR@5338|Agaricales	3PBBW@4751|Fungi		Helix-loop-helix DNA-binding domain
MDBOrad1_01469	2E1I8@1|root,2S8V7@2759|Eukaryota,3AB3C@33154|Opisthokonta,3P7JV@4751|Fungi,3V4UZ@5204|Basidiomycota,22EJ1@155619|Agaricomycetes	3P7JV@4751|Fungi				4
MDBOrad1_01470	2E9MY@1|root,2SIWP@2759|Eukaryota,39J2Q@33154|Opisthokonta,3PBI7@4751|Fungi,3V3PD@5204|Basidiomycota,228NF@155619|Agaricomycetes,3W70Z@5338|Agaricales	3PBI7@4751|Fungi		Helix-loop-helix DNA-binding domain
MDBOrad1_01471	KOG3470@1|root,KOG3470@2759|Eukaryota,3A3KE@33154|Opisthokonta,3P6UM@4751|Fungi,3VBZC@5204|Basidiomycota,22F2J@155619|Agaricomycetes	3P6UM@4751|Fungi		Tubulin binding cofactor A
MDBOrad1_01472	2EART@1|root,2SGYR@2759|Eukaryota,3ADSA@33154|Opisthokonta,3P92U@4751|Fungi,3V33B@5204|Basidiomycota,22A15@155619|Agaricomycetes,3W7RT@5338|Agaricales	3P92U@4751|Fungi		Mediator complex protein
MDBOrad1_01473	COG0488@1|root,KOG0927@2759|Eukaryota,39WB8@33154|Opisthokonta,3NUC4@4751|Fungi,3UYU6@5204|Basidiomycota,225I3@155619|Agaricomycetes	3NUC4@4751|Fungi	RecName: Full=Uncharacterized ABC transporter ATP-binding protein C323.04 [Schizosaccharomyces pombe 972h-]	ABC transporter
MDBOrad1_01474	2D30J@1|root,2SPSB@2759|Eukaryota,3AMAV@33154|Opisthokonta,3PE1E@4751|Fungi,3V5K5@5204|Basidiomycota,22AI4@155619|Agaricomycetes,3W7KU@5338|Agaricales	3PE1E@4751|Fungi
MDBOrad1_01475	2D30J@1|root,2SPSB@2759|Eukaryota,3AMAV@33154|Opisthokonta,3PE1E@4751|Fungi,3V5K5@5204|Basidiomycota,22AI4@155619|Agaricomycetes,3W7KU@5338|Agaricales	3PE1E@4751|Fungi
MDBOrad1_01476	COG1506@1|root,KOG2100@2759|Eukaryota,392MF@33154|Opisthokonta,3Q11N@4751|Fungi,3V50Z@5204|Basidiomycota,22DU4@155619|Agaricomycetes,3W92D@5338|Agaricales	3Q11N@4751|Fungi	RecName: Full=Dipeptidyl-peptidase 5; AltName: Full=Dipeptidyl-peptidase V; Short=DPP V; Short=DppV; Flags: Precursor [Aspergillus fumigatus Af293]	Prolyl oligopeptidase family
MDBOrad1_01477	KOG4833@1|root,KOG4833@2759|Eukaryota,38ETV@33154|Opisthokonta,3Q37V@4751|Fungi,3UYQG@5204|Basidiomycota,226U1@155619|Agaricomycetes	3Q37V@4751|Fungi		Nucleoporin subcomplex protein binding to Pom34
MDBOrad1_01478	2CZ66@1|root,2S8P6@2759|Eukaryota,3AADC@33154|Opisthokonta,3P6V0@4751|Fungi,3V2NA@5204|Basidiomycota,228MI@155619|Agaricomycetes,3W4US@5338|Agaricales	3P6V0@4751|Fungi
MDBOrad1_01479	28JIA@1|root,2QRXF@2759|Eukaryota,38QAU@33154|Opisthokonta,3NV0S@4751|Fungi,3V4XG@5204|Basidiomycota,225SY@155619|Agaricomycetes,3W43G@5338|Agaricales	3NV0S@4751|Fungi		Heterokaryon incompatibility protein Het-C	SP(Sec/SPI)	1
MDBOrad1_01480	COG1215@1|root,KOG2571@2759|Eukaryota,38FKQ@33154|Opisthokonta,3NUPC@4751|Fungi,3UZMT@5204|Basidiomycota,225GB@155619|Agaricomycetes,3W4Z3@5338|Agaricales	3NUPC@4751|Fungi	RecName: Full=Chitin synthase 2 [Cryptococcus neoformans var. grubii H99]	Chitin synthase		7
MDBOrad1_01481
MDBOrad1_01482
MDBOrad1_01483	COG2124@1|root,KOG0156@2759|Eukaryota,38BSU@33154|Opisthokonta,3PA23@4751|Fungi,3V4KK@5204|Basidiomycota,226P9@155619|Agaricomycetes,3W6F0@5338|Agaricales	3PA23@4751|Fungi	RecName: Full=Cytochrome P450 monooxygenase ARMGADRAFT_974139; AltName: Full=Melleolide biosynthesis cluster protein ARMGADRAFT_974139 [Armillaria gallica]	Cytochrome P450	SP(Sec/SPI)	2
MDBOrad1_01484
MDBOrad1_01485	COG2124@1|root,KOG0156@2759|Eukaryota,38BSU@33154|Opisthokonta,3PA23@4751|Fungi,3V4KK@5204|Basidiomycota,226P9@155619|Agaricomycetes,3W8V8@5338|Agaricales	3PA23@4751|Fungi	RecName: Full=Cytochrome P450 monooxygenase ARMGADRAFT_974139; AltName: Full=Melleolide biosynthesis cluster protein ARMGADRAFT_974139 [Armillaria gallica]	Cytochrome P450	SP(Sec/SPI)		yes
MDBOrad1_01486	COG2124@1|root,KOG0156@2759|Eukaryota,3AFV2@33154|Opisthokonta,3PAPP@4751|Fungi,3V4X1@5204|Basidiomycota,2268W@155619|Agaricomycetes,3H24W@355688|Agaricomycetes incertae sedis	3PAPP@4751|Fungi	RecName: Full=Cytochrome P450 monooxygenase COX1; AltName: Full=Alpha-cuprenene oxidase 1 [Coprinopsis cinerea okayama7#130]	Cytochrome P450	SP(Sec/SPI)	1
MDBOrad1_01487	COG2124@1|root,KOG0156@2759|Eukaryota,38BSU@33154|Opisthokonta,3PA23@4751|Fungi,3V4KK@5204|Basidiomycota,226P9@155619|Agaricomycetes,3W6F0@5338|Agaricales	3PA23@4751|Fungi	RecName: Full=Cytochrome P450 monooxygenase ARMGADRAFT_974139; AltName: Full=Melleolide biosynthesis cluster protein ARMGADRAFT_974139 [Armillaria gallica]	Cytochrome P450	SP(Sec/SPI)		yes
MDBOrad1_01488	KOG1164@1|root,KOG1164@2759|Eukaryota,38BQ1@33154|Opisthokonta,3NUPD@4751|Fungi,3UYWD@5204|Basidiomycota,224ZH@155619|Agaricomycetes	3NUPD@4751|Fungi	RecName: Full=Casein kinase I homolog hhp1 [Schizosaccharomyces pombe 972h-]	Protein kinase domain
MDBOrad1_01489	2EBTJ@1|root,2SHU0@2759|Eukaryota,39SRB@33154|Opisthokonta,3P1B4@4751|Fungi,3QR4S@4890|Ascomycota,21FH0@147550|Sordariomycetes,3TN3E@5125|Hypocreales	3P1B4@4751|Fungi	RecName: Full=Altered inheritance of mitochondria protein 9, mitochondrial; AltName: Full=Found in mitochondrial proteome protein 29; Flags: Precursor [Vanderwaltozyma polyspora DSM 70294]	Phosphotransferase enzyme family
MDBOrad1_01490
MDBOrad1_01491	2EK49@1|root,2SQ3R@2759|Eukaryota,3AM7I@33154|Opisthokonta,3PE05@4751|Fungi,3V5JC@5204|Basidiomycota,229GI@155619|Agaricomycetes,3W71M@5338|Agaricales	3PE05@4751|Fungi
MDBOrad1_01492	COG0387@1|root,KOG1397@2759|Eukaryota,38F2Z@33154|Opisthokonta,3NV4R@4751|Fungi,3UYFM@5204|Basidiomycota,226IS@155619|Agaricomycetes,3W4SC@5338|Agaricales	3NV4R@4751|Fungi	RecName: Full=Putative cation exchanger C521.04c [Schizosaccharomyces pombe 972h-]	Sodium/calcium exchanger protein		14
MDBOrad1_01493	2AN22@1|root,2RZDB@2759|Eukaryota,3A2QJ@33154|Opisthokonta,3P1ZH@4751|Fungi,3V39G@5204|Basidiomycota,228Y5@155619|Agaricomycetes,3W742@5338|Agaricales	3P1ZH@4751|Fungi				5
MDBOrad1_01494
MDBOrad1_01495	COG1087@1|root,KOG1371@2759|Eukaryota,38C46@33154|Opisthokonta,3NVGX@4751|Fungi,3UYJA@5204|Basidiomycota,225K2@155619|Agaricomycetes,3H4DK@355688|Agaricomycetes incertae sedis	3NVGX@4751|Fungi	RecName: Full=UDP-glucose 4-epimerase; AltName: Full=Galactowaldenase; AltName: Full=UDP-N-acetylglucosamine 4-epimerase; Short=UDP-GlcNAc 4-epimerase; AltName: Full=UDP-galactosamine 4-epimerase; Short=UDP-GalNAc 4-epimerase; AltName: Full=UDP-galactose 4-epimerase [Dictyostelium discoideum]	GDP-mannose 4,6 dehydratase
MDBOrad1_01496	COG0553@1|root,KOG1001@2759|Eukaryota,39C66@33154|Opisthokonta,3NWA8@4751|Fungi,3V4RE@5204|Basidiomycota,226HD@155619|Agaricomycetes,3W699@5338|Agaricales	3NWA8@4751|Fungi	RecName: Full=F-box protein At3g54460 [Arabidopsis thaliana]	SNF2-related domain
MDBOrad1_01497	2BH6E@1|root,2S1B1@2759|Eukaryota,3A3Y3@33154|Opisthokonta,3P3WS@4751|Fungi,3V23P@5204|Basidiomycota,228XI@155619|Agaricomycetes,3W9VE@5338|Agaricales	3P3WS@4751|Fungi	RecName: Full=Presequence translocated-associated motor subunit PAM17, mitochondrial; Flags: Precursor [Ustilago maydis 521]	Mitochondrial import protein Pam17		2
MDBOrad1_01498	28NXR@1|root,2QVI6@2759|Eukaryota,39UQM@33154|Opisthokonta,3P042@4751|Fungi,3V6VX@5204|Basidiomycota,22AZ6@155619|Agaricomycetes,3H6BW@355688|Agaricomycetes incertae sedis	3P042@4751|Fungi		Variant SH3 domain
MDBOrad1_01499	2ECTA@1|root,2SIK2@2759|Eukaryota,39KYW@33154|Opisthokonta,3Q5CJ@4751|Fungi,3V4FG@5204|Basidiomycota,22FMH@155619|Agaricomycetes	3Q5CJ@4751|Fungi		AAA domain (dynein-related subfamily)
MDBOrad1_01500	2CYZV@1|root,2S7GW@2759|Eukaryota,3AD3X@33154|Opisthokonta,3P6TI@4751|Fungi,3V2N9@5204|Basidiomycota,2298U@155619|Agaricomycetes,3W4WS@5338|Agaricales	3P6TI@4751|Fungi
MDBOrad1_01501	COG0624@1|root,KOG2275@2759|Eukaryota,39RWD@33154|Opisthokonta,3NU4A@4751|Fungi,3UZMD@5204|Basidiomycota,2268D@155619|Agaricomycetes,3W43K@5338|Agaricales	3NU4A@4751|Fungi	RecName: Full=Carboxypeptidase S; AltName: Full=GLY-X carboxypeptidase; AltName: Full=YSCS [Saccharomyces cerevisiae S288C]	Peptidase family M20/M25/M40
MDBOrad1_01502	COG5240@1|root,KOG1078@2759|Eukaryota,38D5J@33154|Opisthokonta,3NW2T@4751|Fungi,3UY14@5204|Basidiomycota,225A2@155619|Agaricomycetes,3W31H@5338|Agaricales	3NW2T@4751|Fungi	RecName: Full=Probable coatomer subunit gamma; AltName: Full=Gamma-coat protein; Short=Gamma-COP [Schizosaccharomyces pombe 972h-]	Fumble
MDBOrad1_01503	KOG0850@1|root,KOG1146@1|root,KOG0850@2759|Eukaryota,KOG1146@2759|Eukaryota,39HE7@33154|Opisthokonta,3PAC9@4751|Fungi,3V3QI@5204|Basidiomycota,225MC@155619|Agaricomycetes,3W4A2@5338|Agaricales	3PAC9@4751|Fungi	RecName: Full=Homeobox protein 10; Short=DdHbx-10 [Dictyostelium discoideum]	Homeodomain
MDBOrad1_01504	2CSJD@1|root,2RC5V@2759|Eukaryota,3AYF1@33154|Opisthokonta,3PJJM@4751|Fungi,3V8XM@5204|Basidiomycota,22DKE@155619|Agaricomycetes,3W9DC@5338|Agaricales	3PJJM@4751|Fungi		F-box-like
MDBOrad1_01505
MDBOrad1_01506	2EWG9@1|root,2SYA8@2759|Eukaryota,3AS3P@33154|Opisthokonta,3PIFF@4751|Fungi,3V6ZJ@5204|Basidiomycota,22CVF@155619|Agaricomycetes,3W9CY@5338|Agaricales	3PIFF@4751|Fungi
MDBOrad1_01507	2EZ6M@1|root,2T0JG@2759|Eukaryota,3ATNR@33154|Opisthokonta,3PH45@4751|Fungi,3V6VI@5204|Basidiomycota,22B6M@155619|Agaricomycetes,3W87V@5338|Agaricales	3PH45@4751|Fungi				1
MDBOrad1_01508	COG5078@1|root,KOG0895@2759|Eukaryota,38TWS@33154|Opisthokonta,3P3QX@4751|Fungi,3V009@5204|Basidiomycota,226WU@155619|Agaricomycetes,3H3WD@355688|Agaricomycetes incertae sedis	3P3QX@4751|Fungi	RecName: Full=Baculoviral IAP repeat-containing protein 6; AltName: Full=BIR repeat-containing ubiquitin-conjugating enzyme; Short=BRUCE; AltName: Full=RING-type E3 ubiquitin transferase BIRC6; AltName: Full=Ubiquitin-conjugating BIR domain enzyme apollon; Short=APOLLON [Homo sapiens]	Ubiquitin-conjugating enzyme
MDBOrad1_01509	COG2513@1|root,KOG1260@2759|Eukaryota,38CWA@33154|Opisthokonta,3NU9G@4751|Fungi,3UYSG@5204|Basidiomycota,22844@155619|Agaricomycetes,3W6II@5338|Agaricales	3NU9G@4751|Fungi	RecName: Full=2-methylisocitrate lyase, mitochondrial; Flags: Precursor [Yarrowia lipolytica CLIB122]	Isocitrate lyase family
MDBOrad1_01510	2EKF4@1|root,2SQC4@2759|Eukaryota,3AM1N@33154|Opisthokonta,3PDSM@4751|Fungi,3V5DN@5204|Basidiomycota,22BZF@155619|Agaricomycetes	3PDSM@4751|Fungi			SP(Sec/SPI)		yes
MDBOrad1_01511	2EKF4@1|root,2SQC4@2759|Eukaryota,3AM1N@33154|Opisthokonta,3PDSM@4751|Fungi,3V5DN@5204|Basidiomycota,22BZF@155619|Agaricomycetes	3PDSM@4751|Fungi			SP(Sec/SPI)		yes
MDBOrad1_01512	COG0480@1|root,KOG0469@2759|Eukaryota,38CUM@33154|Opisthokonta,3NW98@4751|Fungi,3UYE4@5204|Basidiomycota,228B1@155619|Agaricomycetes,3W4M7@5338|Agaricales	3NW98@4751|Fungi	RecName: Full=Elongation factor 2; Short=EF-2 [Komagataella pastoris]	Elongation factor Tu GTP binding domain
MDBOrad1_01513	2EDN4@1|root,2SJ8C@2759|Eukaryota,38M15@33154|Opisthokonta,3P1ER@4751|Fungi,3V59P@5204|Basidiomycota,229MT@155619|Agaricomycetes,3W89B@5338|Agaricales	3P1ER@4751|Fungi		Phosphotransferase enzyme family
MDBOrad1_01514	COG0508@1|root,KOG0558@2759|Eukaryota,38CZZ@33154|Opisthokonta,3NWU1@4751|Fungi,3UZZ3@5204|Basidiomycota,224EZ@155619|Agaricomycetes,3W6GP@5338|Agaricales	3NWU1@4751|Fungi	RecName: Full=Lipoamide acyltransferase component of branched-chain alpha-keto acid dehydrogenase complex, mitochondrial; AltName: Full=Branched-chain alpha-keto acid dehydrogenase complex component E2; Short=BCKAD-E2; Short=BCKADE2; AltName: Full=Dihydrolipoamide acetyltransferase component of branched-chain alpha-keto acid dehydrogenase complex; AltName: Full=Dihydrolipoamide branched chain tra…	2-oxoacid dehydrogenases acyltransferase (catalytic domain)
MDBOrad1_01515	2EWHF@1|root,2SYB6@2759|Eukaryota,3AY82@33154|Opisthokonta,3PJD2@4751|Fungi,3V3CE@5204|Basidiomycota,229J2@155619|Agaricomycetes,3W3NN@5338|Agaricales	3PJD2@4751|Fungi
MDBOrad1_01516	2EWHF@1|root,2SYB6@2759|Eukaryota,3AY82@33154|Opisthokonta,3PJD2@4751|Fungi,3V3CE@5204|Basidiomycota,229J2@155619|Agaricomycetes,3W3NN@5338|Agaricales	3PJD2@4751|Fungi
MDBOrad1_01517	28N64@1|root,2QURC@2759|Eukaryota,3A0V1@33154|Opisthokonta,3P1IE@4751|Fungi,3V2W6@5204|Basidiomycota,228YY@155619|Agaricomycetes,3H4V3@355688|Agaricomycetes incertae sedis	3P1IE@4751|Fungi		Peptidase of plants and bacteria
MDBOrad1_01518						2
MDBOrad1_01519	2D4J4@1|root,2SVC6@2759|Eukaryota,3AR4H@33154|Opisthokonta,3PFTN@4751|Fungi,3V669@5204|Basidiomycota,22CGM@155619|Agaricomycetes,3W99U@5338|Agaricales	3PFTN@4751|Fungi		F-box-like
MDBOrad1_01520	KOG4093@1|root,KOG4093@2759|Eukaryota,3A40Y@33154|Opisthokonta,3P426@4751|Fungi,3V1TR@5204|Basidiomycota,22905@155619|Agaricomycetes,3H4PT@355688|Agaricomycetes incertae sedis	3P426@4751|Fungi	RecName: Full=Protein PBDC1 homolog [Saccharomyces cerevisiae S288C]	Polysaccharide biosynthesis
MDBOrad1_01521	COG1594@1|root,KOG1105@2759|Eukaryota,38FB2@33154|Opisthokonta,3NVD2@4751|Fungi,3UYHB@5204|Basidiomycota,226IE@155619|Agaricomycetes	3NVD2@4751|Fungi	RecName: Full=Transcription elongation factor S-II; AltName: Full=TFIIS [Schizosaccharomyces pombe 972h-]	Transcription factor S-II (TFIIS), central domain
MDBOrad1_01522	2EEID@1|root,2SJXY@2759|Eukaryota,3AIWY@33154|Opisthokonta,3PCBW@4751|Fungi,3V50Y@5204|Basidiomycota,22939@155619|Agaricomycetes,3W6VX@5338|Agaricales	3PCBW@4751|Fungi		Fungal Zn(2)-Cys(6) binuclear cluster domain
MDBOrad1_01523	2E1GA@1|root,2S8TF@2759|Eukaryota,3A252@33154|Opisthokonta,3P80A@4751|Fungi,3V2FI@5204|Basidiomycota,229GA@155619|Agaricomycetes,3W74Y@5338|Agaricales	3P80A@4751|Fungi		Helix-loop-helix DNA-binding domain
MDBOrad1_01524	28V7P@1|root,2R1Z3@2759|Eukaryota,38ID0@33154|Opisthokonta,3PKA4@4751|Fungi,3V9W1@5204|Basidiomycota,22CW0@155619|Agaricomycetes,3H7US@355688|Agaricomycetes incertae sedis	3PKA4@4751|Fungi
MDBOrad1_01525	COG0624@1|root,KOG2275@2759|Eukaryota,39RWD@33154|Opisthokonta,3NU4A@4751|Fungi,3UZMD@5204|Basidiomycota,2268D@155619|Agaricomycetes,3W43K@5338|Agaricales	3NU4A@4751|Fungi	RecName: Full=Carboxypeptidase S; AltName: Full=GLY-X carboxypeptidase; AltName: Full=YSCS [Saccharomyces cerevisiae S288C]	Peptidase family M20/M25/M40		1
MDBOrad1_01526	COG5054@1|root,KOG3355@2759|Eukaryota,3A3X7@33154|Opisthokonta,3P2I1@4751|Fungi,3V1JW@5204|Basidiomycota,2298P@155619|Agaricomycetes,3H4HX@355688|Agaricomycetes incertae sedis	3P2I1@4751|Fungi	RecName: Full=FAD-linked sulfhydryl oxidase ALR; AltName: Full=Augmenter of liver regeneration [Rattus norvegicus]	Erv1 / Alr family
MDBOrad1_01527	KOG2238@1|root,KOG2238@2759|Eukaryota,38FKV@33154|Opisthokonta,3NVSI@4751|Fungi,3UXYD@5204|Basidiomycota,226W6@155619|Agaricomycetes,3W4EZ@5338|Agaricales	3NVSI@4751|Fungi	RecName: Full=Nucleus-vacuole junction protein 2 [Saccharomyces cerevisiae S288C]	Maintenance of mitochondrial morphology protein 1		1
MDBOrad1_01528	2EE8T@1|root,2SJQ3@2759|Eukaryota,3AGQ3@33154|Opisthokonta,3PBFS@4751|Fungi,3V3XJ@5204|Basidiomycota,227MG@155619|Agaricomycetes,3H28Q@355688|Agaricomycetes incertae sedis	3PBFS@4751|Fungi
MDBOrad1_01529				F-box-like
MDBOrad1_01530	295CN@1|root,2RCAK@2759|Eukaryota,3AYIQ@33154|Opisthokonta,3PJP1@4751|Fungi,3V91H@5204|Basidiomycota,22DP3@155619|Agaricomycetes,3W6W4@5338|Agaricales	3PJP1@4751|Fungi
MDBOrad1_01531	2CSJ9@1|root,2RC5K@2759|Eukaryota,3AYEV@33154|Opisthokonta,3PJJG@4751|Fungi,3V8XJ@5204|Basidiomycota,22CEH@155619|Agaricomycetes	3PJJG@4751|Fungi		F-box-like
MDBOrad1_01532	2D4X6@1|root,2SWKJ@2759|Eukaryota,3AUWP@33154|Opisthokonta,3PGYA@4751|Fungi,3V7A6@5204|Basidiomycota,22CD9@155619|Agaricomycetes	3PGYA@4751|Fungi		F-box-like
MDBOrad1_01533	KOG1836@1|root,KOG1836@2759|Eukaryota,3AA1R@33154|Opisthokonta,3P7ND@4751|Fungi,3V25S@5204|Basidiomycota,226PD@155619|Agaricomycetes,3W5TM@5338|Agaricales	3P7ND@4751|Fungi
MDBOrad1_01534	KOG0286@1|root,KOG0286@2759|Eukaryota,38C52@33154|Opisthokonta,3NUGZ@4751|Fungi,3UY7W@5204|Basidiomycota,227C2@155619|Agaricomycetes,3W63P@5338|Agaricales	3NUGZ@4751|Fungi	RecName: Full=Guanine nucleotide-binding protein subunit beta [Cryphonectria parasitica]	WD domain, G-beta repeat
MDBOrad1_01535	COG5459@1|root,KOG2539@2759|Eukaryota,38DHU@33154|Opisthokonta,3NY5I@4751|Fungi,3V0CY@5204|Basidiomycota,224EX@155619|Agaricomycetes,3W3VD@5338|Agaricales	3NY5I@4751|Fungi	RecName: Full=Rsm22-cox11 tandem protein 1, mitochondrial; Contains: RecName: Full=37S ribosomal protein S22-1; Contains: RecName: Full=Cytochrome c oxidase assembly protein cox11-1; Flags: Precursor [Schizosaccharomyces pombe 972h-]	Mitochondrial small ribosomal subunit Rsm22
MDBOrad1_01536	2CZJ4@1|root,2SAM6@2759|Eukaryota,3A606@33154|Opisthokonta,3P5ZJ@4751|Fungi,3V58V@5204|Basidiomycota,229N4@155619|Agaricomycetes	3P5ZJ@4751|Fungi
MDBOrad1_01537	COG0081@1|root,KOG1569@2759|Eukaryota,39TTB@33154|Opisthokonta,3NZ88@4751|Fungi,3V1MN@5204|Basidiomycota,224E4@155619|Agaricomycetes,3W6BD@5338|Agaricales	3NZ88@4751|Fungi	RecName: Full=50S ribosomal protein L1 [Carboxydothermus hydrogenoformans Z-2901]	Ribosomal protein L1p/L10e family
MDBOrad1_01538	COG5030@1|root,KOG0935@2759|Eukaryota,38BNQ@33154|Opisthokonta,3NW9H@4751|Fungi,3V0A8@5204|Basidiomycota,228YP@155619|Agaricomycetes,3W45W@5338|Agaricales	3NW9H@4751|Fungi	RecName: Full=AP-2 complex subunit sigma; AltName: Full=Adaptin small chain; AltName: Full=Clathrin assembly protein 2 sigma small chain; AltName: Full=Sigma2-adaptin [Neurospora crassa OR74A]	Clathrin adaptor complex small chain
MDBOrad1_01539	2ERGS@1|root,2SU9S@2759|Eukaryota,3AQBZ@33154|Opisthokonta,3PFXU@4751|Fungi,3V6IE@5204|Basidiomycota,22AQ6@155619|Agaricomycetes,3H6FZ@355688|Agaricomycetes incertae sedis	3PFXU@4751|Fungi
MDBOrad1_01540	2EPN2@1|root,2SSTM@2759|Eukaryota,3ARFQ@33154|Opisthokonta,3PFNH@4751|Fungi,3V675@5204|Basidiomycota,22CE6@155619|Agaricomycetes,3W9CD@5338|Agaricales	3PFNH@4751|Fungi
MDBOrad1_01541	2CSJD@1|root,2RC5V@2759|Eukaryota,3AYF1@33154|Opisthokonta,3PJJM@4751|Fungi,3V8XM@5204|Basidiomycota,22DKE@155619|Agaricomycetes,3W9DC@5338|Agaricales	3PJJM@4751|Fungi		F-box-like
MDBOrad1_01542	2D4KN@1|root,2SVH8@2759|Eukaryota,3AQ1J@33154|Opisthokonta,3PFEJ@4751|Fungi,3V6GG@5204|Basidiomycota,22BZU@155619|Agaricomycetes,3W9FM@5338|Agaricales	3PFEJ@4751|Fungi		Fungal protein kinase
MDBOrad1_01543	2EMDT@1|root,2SR36@2759|Eukaryota,38VAV@33154|Opisthokonta,3Q0EN@4751|Fungi,3V8PR@5204|Basidiomycota,22DCP@155619|Agaricomycetes,3W77A@5338|Agaricales	seed_ortholog@5346.XP_002910064.1|-		FHA domain		1
MDBOrad1_01544	2EI8I@1|root,2SNQJ@2759|Eukaryota,3AKC3@33154|Opisthokonta,3PDB6@4751|Fungi,3V59I@5204|Basidiomycota,22BWU@155619|Agaricomycetes,3W8TB@5338|Agaricales	3PDB6@4751|Fungi		Family of unknown function (DUF6535)		5
MDBOrad1_01545	2EP84@1|root,2SSGD@2759|Eukaryota,3AP0J@33154|Opisthokonta,3PF1Q@4751|Fungi,3V5Z1@5204|Basidiomycota,22AHW@155619|Agaricomycetes,3W85X@5338|Agaricales	3PF1Q@4751|Fungi
MDBOrad1_01546	2F0DW@1|root,2T1JS@2759|Eukaryota,3AS8X@33154|Opisthokonta,3PHU7@4751|Fungi,3V6QK@5204|Basidiomycota,22CP9@155619|Agaricomycetes,3W8KG@5338|Agaricales	3PHU7@4751|Fungi
MDBOrad1_01547	KOG3417@1|root,KOG3417@2759|Eukaryota,3AHBV@33154|Opisthokonta,3PC85@4751|Fungi,3V3ZN@5204|Basidiomycota,2260V@155619|Agaricomycetes,3W5VR@5338|Agaricales	3PC85@4751|Fungi	RecName: Full=Cell division control protein 25 [Lachancea kluyveri]	RasGEF domain
MDBOrad1_01548	KOG2027@1|root,KOG2027@2759|Eukaryota,38H4P@33154|Opisthokonta,3NW5R@4751|Fungi,3V4UY@5204|Basidiomycota,22EGR@155619|Agaricomycetes	3NW5R@4751|Fungi	RecName: Full=IST1 homolog; AltName: Full=Charged multivesicular body protein 8; Short=CHMP8 [Mus musculus]	Regulator of Vps4 activity in the MVB pathway
MDBOrad1_01549	2CYVH@1|root,2S6PS@2759|Eukaryota,39RW6@33154|Opisthokonta,3NZFC@4751|Fungi,3V50H@5204|Basidiomycota,225XQ@155619|Agaricomycetes,3W3U0@5338|Agaricales	3NZFC@4751|Fungi	RecName: Full=Secondary metabolism regulator laeA; AltName: Full=Methyltransferase laeA [Coprinopsis cinerea okayama7#130]	Methyltransferase domain
MDBOrad1_01550	COG4581@1|root,KOG0947@2759|Eukaryota,38BTP@33154|Opisthokonta,3NUCU@4751|Fungi,3UZ1R@5204|Basidiomycota,2256M@155619|Agaricomycetes,3W3CH@5338|Agaricales	3NUCU@4751|Fungi	RecName: Full=Putative ATP-dependent RNA helicase C550.03c [Schizosaccharomyces pombe 972h-]	DSHCT (NUC185) domain
MDBOrad1_01551	2C4P0@1|root,2SVMC@2759|Eukaryota,3AQGG@33154|Opisthokonta,3PFX7@4751|Fungi,3V6E3@5204|Basidiomycota,22DQA@155619|Agaricomycetes,3W7VD@5338|Agaricales	3PFX7@4751|Fungi
MDBOrad1_01552
MDBOrad1_01553	COG2801@1|root,KOG0017@2759|Eukaryota,38F42@33154|Opisthokonta,3NVKU@4751|Fungi,3UXZ9@5204|Basidiomycota,2286X@155619|Agaricomycetes	3NVKU@4751|Fungi	RecName: Full=Retrovirus-related Pol polyprotein from transposon 17.6; Includes: RecName: Full=Protease; Includes: RecName: Full=Reverse transcriptase; Includes: RecName: Full=Endonuclease [Drosophila melanogaster]	RNase H-like domain found in reverse transcriptase
MDBOrad1_01554
MDBOrad1_01555	2E0CM@1|root,2S7TE@2759|Eukaryota,3A6VU@33154|Opisthokonta,3P6RY@4751|Fungi,3VC1H@5204|Basidiomycota,22F4M@155619|Agaricomycetes	3P6RY@4751|Fungi		Nuclear cap-binding protein subunit 3
MDBOrad1_01556	2BH46@1|root,2S1AV@2759|Eukaryota,3A4GK@33154|Opisthokonta,3P450@4751|Fungi,3V1EX@5204|Basidiomycota,2296U@155619|Agaricomycetes,3W76W@5338|Agaricales	3P450@4751|Fungi
MDBOrad1_01557	2BVG5@1|root,2S284@2759|Eukaryota,3A5AD@33154|Opisthokonta,3P42N@4751|Fungi,3V1H0@5204|Basidiomycota,22698@155619|Agaricomycetes,3H3M8@355688|Agaricomycetes incertae sedis	3P42N@4751|Fungi
MDBOrad1_01558	2EIMB@1|root,2SP0B@2759|Eukaryota,3AMKX@33154|Opisthokonta,3PDUG@4751|Fungi,3V5NY@5204|Basidiomycota,22DUH@155619|Agaricomycetes,3W92W@5338|Agaricales	3PDUG@4751|Fungi
MDBOrad1_01559	2CPBU@1|root,2R183@2759|Eukaryota,3AYT6@33154|Opisthokonta,3PJWS@4751|Fungi,3V9BM@5204|Basidiomycota,22B3B@155619|Agaricomycetes	3PJWS@4751|Fungi
MDBOrad1_01560	2EP5M@1|root,2SSEC@2759|Eukaryota,3AP8V@33154|Opisthokonta,3PEDW@4751|Fungi,3V63W@5204|Basidiomycota,22ACM@155619|Agaricomycetes,3W7XS@5338|Agaricales	3PEDW@4751|Fungi
MDBOrad1_01561	COG2036@1|root,KOG0869@2759|Eukaryota,3A3IS@33154|Opisthokonta,3P23V@4751|Fungi,3V1YW@5204|Basidiomycota,229H1@155619|Agaricomycetes	3P23V@4751|Fungi	RecName: Full=Nuclear transcription factor Y subunit beta; AltName: Full=CAAT box DNA-binding protein subunit B; AltName: Full=Nuclear transcription factor Y subunit B; Short=NF-YB [Petromyzon marinus]	Histone-like transcription factor (CBF/NF-Y) and archaeal histone
MDBOrad1_01562	COG0665@1|root,KOG3923@2759|Eukaryota,39U0H@33154|Opisthokonta,3NWAE@4751|Fungi,3V42E@5204|Basidiomycota,228EP@155619|Agaricomycetes,3H08R@355688|Agaricomycetes incertae sedis	3NWAE@4751|Fungi	RecName: Full=D-aspartate oxidase; Short=DASOX; AltName: Full=DDO [Dictyostelium discoideum]	FAD dependent oxidoreductase
MDBOrad1_01563	KOG4660@1|root,KOG4660@2759|Eukaryota,3A1ZR@33154|Opisthokonta,3P34P@4751|Fungi,3V0T2@5204|Basidiomycota,226H1@155619|Agaricomycetes,3W4Y9@5338|Agaricales	3P34P@4751|Fungi	RecName: Full=Protein MEI2-like 4; Short=AML4; AltName: Full=MEI2-like protein 4 [Arabidopsis thaliana]	RNA recognition motif. (a.k.a. RRM, RBD, or RNP domain)
MDBOrad1_01564	KOG0092@1|root,KOG0092@2759|Eukaryota,38HB3@33154|Opisthokonta,3NVI3@4751|Fungi,3V08U@5204|Basidiomycota,226JJ@155619|Agaricomycetes,3H39T@355688|Agaricomycetes incertae sedis	3NVI3@4751|Fungi	RecName: Full=Ras-related protein Rab-5B [Gallus gallus]	Ras family
MDBOrad1_01565	2DZTK@1|root,2S7AC@2759|Eukaryota,3AE32@33154|Opisthokonta,3P9I1@4751|Fungi,3V374@5204|Basidiomycota,22EJD@155619|Agaricomycetes	3P9I1@4751|Fungi	RecName: Full=Mitogen-activated protein kinase kinase kinase 3; AltName: Full=MAP3K alpha protein kinase; Short=AtMAP3Kalpha [Arabidopsis thaliana]	Protein tyrosine and serine/threonine kinase
MDBOrad1_01566	2D4UT@1|root,2SWCV@2759|Eukaryota,3AY8C@33154|Opisthokonta,3PJD9@4751|Fungi,3V8Q7@5204|Basidiomycota,22DD3@155619|Agaricomycetes,3W9EY@5338|Agaricales	3PJD9@4751|Fungi
MDBOrad1_01567
MDBOrad1_01568	KOG3501@1|root,2SCTZ@2759|Eukaryota,3A69R@33154|Opisthokonta,3Q3GH@4751|Fungi,3V5H7@5204|Basidiomycota,229WS@155619|Agaricomycetes,3W7FC@5338|Agaricales	3Q3GH@4751|Fungi	RecName: Full=Prefoldin subunit 1 [Tetraodon nigroviridis]	Prefoldin subunit
MDBOrad1_01569	COG0480@1|root,KOG0468@2759|Eukaryota,3ANBS@33154|Opisthokonta,3NVZK@4751|Fungi,3UYXF@5204|Basidiomycota,227GQ@155619|Agaricomycetes,3W5XX@5338|Agaricales	3NVZK@4751|Fungi	RecName: Full=116 kDa U5 small nuclear ribonucleoprotein component; AltName: Full=Elongation factor Tu GTP-binding domain-containing protein 2; AltName: Full=SNU114 homolog; Short=hSNU114; AltName: Full=U5 snRNP-specific protein, 116 kDa; Short=U5-116 kDa [Homo sapiens]	Elongation factor Tu GTP binding domain
MDBOrad1_01570	KOG0675@1|root,KOG0675@2759|Eukaryota,38HTR@33154|Opisthokonta,3NV5M@4751|Fungi,3UYVQ@5204|Basidiomycota,22DRN@155619|Agaricomycetes,3W6R2@5338|Agaricales	3NV5M@4751|Fungi	RecName: Full=Calnexin; Flags: Precursor [Cryptococcus neoformans var. grubii H99]	Calreticulin family	SP(Sec/SPI)	1
MDBOrad1_01571	2D4KN@1|root,2SVH8@2759|Eukaryota,3AQ1J@33154|Opisthokonta,3PFEJ@4751|Fungi,3V6GG@5204|Basidiomycota,22BZU@155619|Agaricomycetes,3W9FM@5338|Agaricales	3PFEJ@4751|Fungi		Fungal protein kinase
MDBOrad1_01572	2D4J4@1|root,2SVC6@2759|Eukaryota,3AR4H@33154|Opisthokonta,3PFTN@4751|Fungi,3V669@5204|Basidiomycota,22CGM@155619|Agaricomycetes,3W99U@5338|Agaricales	3PFTN@4751|Fungi		F-box-like
MDBOrad1_01573	2D4J4@1|root,2SVC6@2759|Eukaryota,3AR4H@33154|Opisthokonta,3PFTN@4751|Fungi,3V669@5204|Basidiomycota,22CGM@155619|Agaricomycetes,3W99U@5338|Agaricales	3PFTN@4751|Fungi		F-box-like
MDBOrad1_01574	2E74K@1|root,2SDS3@2759|Eukaryota,3A8V4@33154|Opisthokonta,3P6R0@4751|Fungi,3V2HU@5204|Basidiomycota,22ACK@155619|Agaricomycetes,3W84S@5338|Agaricales	3P6R0@4751|Fungi		ATP synthase E chain
MDBOrad1_01575	2BZM1@1|root,2SMY3@2759|Eukaryota,3AK2X@33154|Opisthokonta,3PDIW@4751|Fungi,3V53D@5204|Basidiomycota,2292Q@155619|Agaricomycetes,3W95Z@5338|Agaricales	3PDIW@4751|Fungi				7
MDBOrad1_01576	2D4KN@1|root,2SVH8@2759|Eukaryota,3AQ1J@33154|Opisthokonta,3PFEJ@4751|Fungi,3V6GG@5204|Basidiomycota,22BZU@155619|Agaricomycetes,3W9FM@5338|Agaricales	3PFEJ@4751|Fungi		Fungal protein kinase
MDBOrad1_01577	2D4KN@1|root,2SVH8@2759|Eukaryota,3AQ1J@33154|Opisthokonta,3PFEJ@4751|Fungi,3V6GG@5204|Basidiomycota,22BZU@155619|Agaricomycetes,3W9FM@5338|Agaricales	3PFEJ@4751|Fungi		Fungal protein kinase
MDBOrad1_01578
MDBOrad1_01579	29UUC@1|root,2RXJG@2759|Eukaryota,39R72@33154|Opisthokonta,3NWCP@4751|Fungi,3V0Y2@5204|Basidiomycota,2268K@155619|Agaricomycetes,3W472@5338|Agaricales	3NWCP@4751|Fungi		Phytanoyl-CoA dioxygenase (PhyH)
MDBOrad1_01580	296JY@1|root,2QSUF@2759|Eukaryota,39JB6@33154|Opisthokonta	39JB6@33154|Opisthokonta	RecName: Full=Ingression protein fic1; AltName: Full=Cdc15-interacting C2 domain-containing protein 1 [Schizosaccharomyces pombe 972h-]	C2 domain
MDBOrad1_01581	KOG1192@1|root,KOG1192@2759|Eukaryota,39ZGR@33154|Opisthokonta,3NUBC@4751|Fungi,3QPTI@4890|Ascomycota,20ZRE@147548|Leotiomycetes	3NUBC@4751|Fungi	RecName: Full=UDP-glucosyltransferase B1; Short=GTII [Starmerella bombicola]	UDP-glucoronosyl and UDP-glucosyl transferase
MDBOrad1_01582
MDBOrad1_01583	COG5213@1|root,KOG1049@2759|Eukaryota,38DU4@33154|Opisthokonta,3NYKM@4751|Fungi,3V1TK@5204|Basidiomycota,227HG@155619|Agaricomycetes,3H0P7@355688|Agaricomycetes incertae sedis	3NYKM@4751|Fungi	RecName: Full=Pre-mRNA polyadenylation factor fip1 [Schizosaccharomyces pombe 972h-]	Fip1 motif		6
MDBOrad1_01584	2D3KV@1|root,2SRYS@2759|Eukaryota,3ANI5@33154|Opisthokonta,3PERB@4751|Fungi,3V64H@5204|Basidiomycota,22AAB@155619|Agaricomycetes	3PERB@4751|Fungi		Family of unknown function (DUF6534)		6
MDBOrad1_01585	2E2RQ@1|root,2S9YH@2759|Eukaryota,38IK0@33154|Opisthokonta,3PKH6@4751|Fungi,3V2E6@5204|Basidiomycota,22951@155619|Agaricomycetes,3W6JA@5338|Agaricales	3PKH6@4751|Fungi	RecName: Full=50S ribosomal protein L10 [Gluconacetobacter diazotrophicus PA1 5]
MDBOrad1_01586	KOG0264@1|root,KOG0264@2759|Eukaryota,38E9H@33154|Opisthokonta,3NV7T@4751|Fungi,3UZDN@5204|Basidiomycota,226RQ@155619|Agaricomycetes,3W3UI@5338|Agaricales	3NV7T@4751|Fungi	RecName: Full=Histone acetyltransferase type B subunit 2 [Ustilago maydis 521]	Histone-binding protein RBBP4 or subunit C of CAF1 complex
MDBOrad1_01587	KOG4174@1|root,KOG4174@2759|Eukaryota,39UGE@33154|Opisthokonta,3P02Z@4751|Fungi,3V1A6@5204|Basidiomycota,22696@155619|Agaricomycetes,3W6HZ@5338|Agaricales	3P02Z@4751|Fungi	RecName: Full=25S rRNA (uridine(2634)-N(3))-methyltransferase; AltName: Full=Base methyltransferase of 25S RNA 5 [Saccharomyces cerevisiae S288C]	rRNA (uridine-N3-)-methyltransferase BTM5-like
MDBOrad1_01588						1
MDBOrad1_01589	COG2162@1|root,2RD0D@2759|Eukaryota,39PIK@33154|Opisthokonta,3P5BK@4751|Fungi,3V1RF@5204|Basidiomycota,22AJA@155619|Agaricomycetes,3W7DZ@5338|Agaricales	3P5BK@4751|Fungi		N-acetyltransferase
MDBOrad1_01590	2D4KN@1|root,2SVH8@2759|Eukaryota,3AQ1J@33154|Opisthokonta,3PFEJ@4751|Fungi,3V6GG@5204|Basidiomycota,22BZU@155619|Agaricomycetes,3W9FM@5338|Agaricales	3PFEJ@4751|Fungi		Fungal protein kinase
MDBOrad1_01591	2D4KN@1|root,2SVH8@2759|Eukaryota,3AQ1J@33154|Opisthokonta,3PFEJ@4751|Fungi,3V6GG@5204|Basidiomycota,22BZU@155619|Agaricomycetes,3W9FM@5338|Agaricales	3PFEJ@4751|Fungi		Fungal protein kinase
MDBOrad1_01592	2BZM1@1|root,2SMY3@2759|Eukaryota,3AK2X@33154|Opisthokonta,3PDIW@4751|Fungi,3V53D@5204|Basidiomycota,2292Q@155619|Agaricomycetes,3W95Z@5338|Agaricales	3PDIW@4751|Fungi				7
MDBOrad1_01593	2E44R@1|root,2SB33@2759|Eukaryota,3AAE8@33154|Opisthokonta,3P7W1@4751|Fungi,3V2R8@5204|Basidiomycota,22AAY@155619|Agaricomycetes,3H5UQ@355688|Agaricomycetes incertae sedis	3P7W1@4751|Fungi
MDBOrad1_01594
MDBOrad1_01595
MDBOrad1_01596	2D4KN@1|root,2SVH8@2759|Eukaryota,3AQ1J@33154|Opisthokonta,3PFEJ@4751|Fungi,3V6GG@5204|Basidiomycota,22BZU@155619|Agaricomycetes,3H776@355688|Agaricomycetes incertae sedis	3PFEJ@4751|Fungi		Fungal protein kinase
MDBOrad1_01597	2D4KN@1|root,2SVH8@2759|Eukaryota,3AQ1J@33154|Opisthokonta,3PFEJ@4751|Fungi,3V6GG@5204|Basidiomycota,22BZU@155619|Agaricomycetes,3W9FM@5338|Agaricales	3PFEJ@4751|Fungi		Fungal protein kinase
MDBOrad1_01598	COG5210@1|root,KOG1102@2759|Eukaryota,38E96@33154|Opisthokonta,3NX4T@4751|Fungi,3UZIC@5204|Basidiomycota,225NV@155619|Agaricomycetes,3W3JI@5338|Agaricales	3NX4T@4751|Fungi	RecName: Full=TBC domain-containing protein C1778.09 [Schizosaccharomyces pombe 972h-]	Rab-GTPase-TBC domain
MDBOrad1_01599	COG0328@1|root,KOG3752@2759|Eukaryota,39U14@33154|Opisthokonta,3NU3Q@4751|Fungi,3V16N@5204|Basidiomycota,229RD@155619|Agaricomycetes,3H53Z@355688|Agaricomycetes incertae sedis	3NU3Q@4751|Fungi	RecName: Full=Ribonuclease H; Short=RNase H [Schizosaccharomyces pombe 972h-]	RNase H
MDBOrad1_01600	2D4KN@1|root,2SVH8@2759|Eukaryota,3AQ1J@33154|Opisthokonta,3PFEJ@4751|Fungi,3V6GG@5204|Basidiomycota,22BZU@155619|Agaricomycetes,3W9FM@5338|Agaricales	3PFEJ@4751|Fungi		Fungal protein kinase
MDBOrad1_01601
MDBOrad1_01602	COG2162@1|root,2RD0D@2759|Eukaryota,39PIK@33154|Opisthokonta,3P5BK@4751|Fungi,3V1RF@5204|Basidiomycota,22AJA@155619|Agaricomycetes,3W7DZ@5338|Agaricales	3P5BK@4751|Fungi
MDBOrad1_01603
MDBOrad1_01604	KOG0255@1|root,KOG0255@2759|Eukaryota,38D5E@33154|Opisthokonta,3NTW3@4751|Fungi,3UY64@5204|Basidiomycota,225E3@155619|Agaricomycetes,3W64W@5338|Agaricales	3NTW3@4751|Fungi	RecName: Full=Citrinin biosynthesis cluster MFS transporter mrr1 [Monascus ruber]	Major Facilitator Superfamily		11
MDBOrad1_01605	COG2124@1|root,KOG0157@2759|Eukaryota,39JR7@33154|Opisthokonta,3Q431@4751|Fungi	3Q431@4751|Fungi	RecName: Full=Cytochrome P450 monooxygenase flvD; AltName: Full=Flavunoidine biosynthesis cluster protein D [Aspergillus flavus NRRL3357]	Cytochrome P450		1
MDBOrad1_01606	COG5034@1|root,KOG1973@2759|Eukaryota,38E9X@33154|Opisthokonta,3P52H@4751|Fungi,3V1BJ@5204|Basidiomycota,228J2@155619|Agaricomycetes,3W3H4@5338|Agaricales	3P52H@4751|Fungi	RecName: Full=Transcriptional regulatory protein PHO23 [Saccharomyces cerevisiae S288C]	Inhibitor of growth proteins N-terminal histone-binding
MDBOrad1_01607	2EQ98@1|root,2SX7P@2759|Eukaryota,3AV1Z@33154|Opisthokonta,3PHI7@4751|Fungi,3V79H@5204|Basidiomycota,22CPT@155619|Agaricomycetes	3PHI7@4751|Fungi		NUDIX domain
MDBOrad1_01608	2EW5M@1|root,2SY1D@2759|Eukaryota,3AVIV@33154|Opisthokonta,3PIBN@4751|Fungi,3V77D@5204|Basidiomycota	3PIBN@4751|Fungi		F-box-like
MDBOrad1_01609	COG1131@1|root,KOG0065@2759|Eukaryota,38F6P@33154|Opisthokonta,3NTZE@4751|Fungi,3UZ2C@5204|Basidiomycota,225G9@155619|Agaricomycetes,3W6F9@5338|Agaricales	3NTZE@4751|Fungi	RecName: Full=ABC multidrug transporter AFR1 [Cryptococcus gattii VGII R265]	ABC-2 type transporter		10
MDBOrad1_01610	28J3Y@1|root,2QRFY@2759|Eukaryota,3A18M@33154|Opisthokonta,3P1RW@4751|Fungi,3V0VJ@5204|Basidiomycota,224G8@155619|Agaricomycetes,3H0VX@355688|Agaricomycetes incertae sedis	3P1RW@4751|Fungi		EF-hand domain	SP(Sec/SPI)		yes
MDBOrad1_01611	COG5221@1|root,KOG3613@2759|Eukaryota,38ED7@33154|Opisthokonta,3NUVT@4751|Fungi,3UYYF@5204|Basidiomycota,227UN@155619|Agaricomycetes,3W5T5@5338|Agaricales	3NUVT@4751|Fungi	RecName: Full=Protein dopey [Aspergillus nidulans FGSC A4]	Dopey, N-terminal
MDBOrad1_01612	2EHDC@1|root,2SN2M@2759|Eukaryota,3AKG8@33154|Opisthokonta,3PDBJ@4751|Fungi,3V56P@5204|Basidiomycota,229I2@155619|Agaricomycetes	3PDBJ@4751|Fungi
MDBOrad1_01613	KOG2366@1|root,KOG2366@2759|Eukaryota,39VC9@33154|Opisthokonta,3NWFZ@4751|Fungi,3V3U3@5204|Basidiomycota,227QC@155619|Agaricomycetes,3W55E@5338|Agaricales	3NWFZ@4751|Fungi	RecName: Full=Probable alpha-galactosidase B; AltName: Full=Melibiase B; Flags: Precursor [Aspergillus flavus NRRL3357]	Alpha galactosidase A		1
MDBOrad1_01614	2EMDN@1|root,2SR31@2759|Eukaryota,3ANMS@33154|Opisthokonta,3PF7K@4751|Fungi,3V5ZN@5204|Basidiomycota,22BZ4@155619|Agaricomycetes,3H7I4@355688|Agaricomycetes incertae sedis	3PF7K@4751|Fungi
MDBOrad1_01615	2EMDN@1|root,2SR31@2759|Eukaryota,3ANMS@33154|Opisthokonta,3PF7K@4751|Fungi,3V5ZN@5204|Basidiomycota,22BZ4@155619|Agaricomycetes,3H7I4@355688|Agaricomycetes incertae sedis	3PF7K@4751|Fungi
MDBOrad1_01616	COG0184@1|root,KOG2815@2759|Eukaryota,39VVE@33154|Opisthokonta,3NZCB@4751|Fungi,3V1T1@5204|Basidiomycota,22945@155619|Agaricomycetes,3W7EJ@5338|Agaricales	3NZCB@4751|Fungi	RecName: Full=30S ribosomal protein S15 [Magnetococcus marinus MC-1]	Ribosomal protein S15
MDBOrad1_01617	COG0043@1|root,2QR5I@2759|Eukaryota,38EAD@33154|Opisthokonta,3NZD5@4751|Fungi	3NZD5@4751|Fungi	RecName: Full=Ferulic acid decarboxylase 1; AltName: Full=Phenacrylate decarboxylase [Aspergillus niger CBS 513.88]	3-octaprenyl-4-hydroxybenzoate carboxy-lyase
MDBOrad1_01618	COG0163@1|root,2QWR5@2759|Eukaryota,38UIR@33154|Opisthokonta,3P1DG@4751|Fungi	3P1DG@4751|Fungi	RecName: Full=Flavin prenyltransferase PAD1, mitochondrial; AltName: Full=Phenylacrylic acid decarboxylase 1; Short=PAD; Flags: Precursor [Saccharomyces cerevisiae S288C]	Flavoprotein
MDBOrad1_01619	COG2042@1|root,KOG3154@2759|Eukaryota,38FB5@33154|Opisthokonta,3NUW8@4751|Fungi,3UYNT@5204|Basidiomycota,226XK@155619|Agaricomycetes	3NUW8@4751|Fungi	RecName: Full=18S rRNA aminocarboxypropyltransferase [Schizosaccharomyces pombe 972h-]	Ribosome biogenesis protein, C-terminal
MDBOrad1_01620	COG0591@1|root,KOG2348@2759|Eukaryota,38H6Q@33154|Opisthokonta,3NUX6@4751|Fungi,3UXTR@5204|Basidiomycota	3NUX6@4751|Fungi	RecName: Full=Probable urea active transporter 1 [Schizosaccharomyces pombe 972h-]	Sodium:solute symporter family		13
MDBOrad1_01621	COG0154@1|root,KOG1212@2759|Eukaryota,38CWX@33154|Opisthokonta,3NTYP@4751|Fungi,3V04C@5204|Basidiomycota,224XR@155619|Agaricomycetes,3H0MU@355688|Agaricomycetes incertae sedis	3NTYP@4751|Fungi	RecName: Full=Acetamidase [Aspergillus nidulans FGSC A4]	Amidase
MDBOrad1_01622	2A8DJ@1|root,2RYG9@2759|Eukaryota,39T7U@33154|Opisthokonta,3P06C@4751|Fungi,3V0HG@5204|Basidiomycota,2271F@155619|Agaricomycetes,3W55Y@5338|Agaricales	3P06C@4751|Fungi				1
MDBOrad1_01623	KOG2491@1|root,KOG2491@2759|Eukaryota,38FFI@33154|Opisthokonta,3NZEE@4751|Fungi,3V0BK@5204|Basidiomycota,22DYX@155619|Agaricomycetes,3H18F@355688|Agaricomycetes incertae sedis	3NZEE@4751|Fungi	RecName: Full=THO complex subunit 1; Short=Tho1; AltName: Full=Nuclear matrix protein p84 [Mus musculus]	THO complex subunit 1 transcription elongation factor
MDBOrad1_01624	295UK@1|root,2RCT5@2759|Eukaryota,3AYUQ@33154|Opisthokonta,3PJYB@4751|Fungi,3V9DC@5204|Basidiomycota,22BC2@155619|Agaricomycetes,3H6RK@355688|Agaricomycetes incertae sedis	3PJYB@4751|Fungi
MDBOrad1_01625	28ZGG@1|root,2R6AV@2759|Eukaryota,3AYEX@33154|Opisthokonta,3PJJI@4751|Fungi,3V9QG@5204|Basidiomycota,22CJ2@155619|Agaricomycetes	3PJJI@4751|Fungi		F-box-like
MDBOrad1_01626	COG5077@1|root,KOG1863@2759|Eukaryota,39PGC@33154|Opisthokonta,3NVJH@4751|Fungi,3UZHT@5204|Basidiomycota,224CT@155619|Agaricomycetes,3W3AA@5338|Agaricales	3NVJH@4751|Fungi	RecName: Full=Probable ubiquitin carboxyl-terminal hydrolase 2; AltName: Full=Deubiquitinating enzyme 2; AltName: Full=Ubiquitin thioesterase 2; AltName: Full=Ubiquitin-specific-processing protease 2 [Schizosaccharomyces pombe 972h-]	Ubiquitin carboxyl-terminal hydrolase
MDBOrad1_01627
MDBOrad1_01628	2CMXA@1|root,2QSHV@2759|Eukaryota,38YCD@33154|Opisthokonta,3NZE6@4751|Fungi,3V3EQ@5204|Basidiomycota,228HR@155619|Agaricomycetes,3W6MH@5338|Agaricales	3NZE6@4751|Fungi			SP(Sec/SPI)		yes
MDBOrad1_01629	2CVPB@1|root,2RSFE@2759|Eukaryota,3AY2W@33154|Opisthokonta,3PJ83@4751|Fungi,3V8I7@5204|Basidiomycota,22CYW@155619|Agaricomycetes,3W9FW@5338|Agaricales	3PJ83@4751|Fungi
MDBOrad1_01630					SP(Sec/SPI)		yes
MDBOrad1_01631					SP(Sec/SPI)	1
MDBOrad1_01632	2E9UX@1|root,2SG5G@2759|Eukaryota,3A3VR@33154|Opisthokonta,3P4VS@4751|Fungi	3P4VS@4751|Fungi		alpha/beta hydrolase fold
[truncated: 19,676 more rows]
