# Supplementary material for: Whole Genome Sequence of an Edible Mushroom Oudemansiella raphanipes (Changgengu)
Source: J Fungi (Basel). 2023 Feb 16;9(2):266. doi: 10.3390/jof9020266 (PMC9961838; doi:10.3390/jof9020266)
Supplement: Supplementary file 1 [file jof-09-00266-s001.zip › Table S2.xlsx]

## Sheet: Sheet1
Table S2. Prediction of gene clusters for secondary metabolites in O. raphanipes CGG-A-s1
Contig location	From	To	Type
contig 01	902586	967180	fungal-RiPP-like
contig 01	1720565	1732705	NRPS-independent-siderophore
contig 01	3253592	3274282	terpene
contig 01	3687050	3710419	terpene
contig 01	4282239	4325031	T1PKS
contig 02	570013	613544	NRPS
contig 02	676753	700824	terpene
contig 02	971874	1015620	NRPS-like
contig 02	3971210	4031776	fungal-RiPP-like
contig 03	1110707	1155536	NRPS-like
contig 03	2354426	2374105	terpene
contig 03	2443853	2462311	terpene
contig 03	3642229	3673363	terpene
contig 03	3710179	3735264	terpene
contig 04	1615100	1636791	terpene
contig 04	1982686	1998318	indole
contig 04	2021865	2043394	indole
contig 05	745515	763828	terpene
contig 05	769398	787451	terpene
contig 05	830945	851039	terpene
contig 05	2644185	2660399	terpene
contig 05	2801294	2845439	NRPS-like
contig 05	3553330	3619042	fungal-RiPP-like,terpene
contig 06	979840	1029809	T1PKS
contig 06	1743805	1761354	terpene
contig 06	1802330	1823470	terpene
contig 06	2182285	2226096	NRPS-like
contig 07	994626	1014599	terpene
contig 07	1144985	1164244	terpene
contig 07	1263337	1284693	terpene
contig 07	2387802	2433149	NRPS-like
contig 08	298459	343760	NRPS-like
contig 08	1719011	1762186	T1PKS
contig 08	2126010	2168471	T1PKS
contig 09	493275	514489	terpene
contig 09	526341	567137	NRPS-like
contig 09	1026376	1066648	NRPS-like
contig 09	1075052	1146899	NRPS-like
contig 09	1401287	1457861	fungal-RiPP-like
contig 09	2119575	2180450	fungal-RiPP-like
contig 10	922945	967162	NRPS-like
contig 10	1207855	1219486	NRPS-independent-siderophore
contig 11	591753	638346	T1PKS
contig 11	1183192	1213672	terpene
contig 12	1157737	1177200	terpene
contig 12	1341771	1362919	terpene
contig 14	935556	1000383	fungal-RiPP-like
contig 15	627436	671569	NRPS-like
contig 16	870897	892158	terpene
contig 18	634506	677814	NRPS-like
contig 18	826145	873040	NRPS-like
contig 18	1091452	1137947	T1PKS
contig 19	897152	918436	terpene
contig 22	254696	301104	NRPS-like
contig 32	270724	326739	NRPS
contig 36	124850	146318	terpene
