# Supplementary material for: Whole Genome Sequence of an Edible Mushroom Oudemansiella raphanipes (Changgengu)
Source: J Fungi (Basel). 2023 Feb 16;9(2):266. doi: 10.3390/jof9020266 (PMC9961838; doi:10.3390/jof9020266)
Supplement: Supplementary file 1 [file jof-09-00266-s001.zip › Table S3.xlsx]

## Sheet: Sheet1
Table S3. Gene lists of CAZymes in O. raphanipes CGG-A-s1
Family	Gene Lists
AA1	MDBOrad1_07547, MDBOrad1_20911
AA14	MDBOrad1_03191, MDBOrad1_12029, MDBOrad1_16800, MDBOrad1_16804, MDBOrad1_16816, MDBOrad1_17565
AA16	MDBOrad1_05783, MDBOrad1_15093
AA1_1	MDBOrad1_02501, MDBOrad1_04593, MDBOrad1_07700, MDBOrad1_07708, MDBOrad1_08080, MDBOrad1_11509, MDBOrad1_12872, MDBOrad1_13364, MDBOrad1_15739, MDBOrad1_18061, MDBOrad1_19402, MDBOrad1_19878, MDBOrad1_20585, MDBOrad1_21219, MDBOrad1_21230
AA1_2	MDBOrad1_03918, MDBOrad1_03945, MDBOrad1_03951, MDBOrad1_16329, MDBOrad1_17544
AA2	MDBOrad1_01808, MDBOrad1_01826, MDBOrad1_03119, MDBOrad1_06077, MDBOrad1_06295, MDBOrad1_09279, MDBOrad1_12264, MDBOrad1_13453, MDBOrad1_13456, MDBOrad1_13475, MDBOrad1_20154, MDBOrad1_20209
AA3_1	MDBOrad1_08566, MDBOrad1_12729, MDBOrad1_18003
AA3_2	MDBOrad1_00494, MDBOrad1_00570, MDBOrad1_01766, MDBOrad1_03341, MDBOrad1_04063, MDBOrad1_04064, MDBOrad1_04070, MDBOrad1_04071, MDBOrad1_04098, MDBOrad1_04111, MDBOrad1_04112, MDBOrad1_04334, MDBOrad1_04698, MDBOrad1_04709, MDBOrad1_04982, MDBOrad1_05259, MDBOrad1_06236, MDBOrad1_07110, MDBOrad1_07275, MDBOrad1_08512, MDBOrad1_08966, MDBOrad1_09886, MDBOrad1_09886, MDBOrad1_10153, MDBOrad1_10154,…
AA3_3	MDBOrad1_05929, MDBOrad1_07056, MDBOrad1_11352, MDBOrad1_12730, MDBOrad1_14633, MDBOrad1_16339
AA4	MDBOrad1_00928, MDBOrad1_18807
AA5	MDBOrad1_14232
AA5_1	MDBOrad1_03997, MDBOrad1_04054, MDBOrad1_04249, MDBOrad1_09803, MDBOrad1_11880, MDBOrad1_11888, MDBOrad1_12801, MDBOrad1_13643, MDBOrad1_15160, MDBOrad1_17733, MDBOrad1_20045, MDBOrad1_20731
AA6	MDBOrad1_05136, MDBOrad1_20517
AA7	MDBOrad1_00135, MDBOrad1_02169, MDBOrad1_02221, MDBOrad1_02313, MDBOrad1_02360, MDBOrad1_02943, MDBOrad1_02944, MDBOrad1_02967, MDBOrad1_03033, MDBOrad1_03093, MDBOrad1_03432, MDBOrad1_04628, MDBOrad1_05700, MDBOrad1_08177, MDBOrad1_08802, MDBOrad1_09170, MDBOrad1_09509, MDBOrad1_10119, MDBOrad1_11590, MDBOrad1_12472, MDBOrad1_12474, MDBOrad1_12495, MDBOrad1_12846, MDBOrad1_13266, MDBOrad1_14296,…
AA8	MDBOrad1_08566, MDBOrad1_12729
AA9	MDBOrad1_02063, MDBOrad1_04729, MDBOrad1_04836, MDBOrad1_06070, MDBOrad1_06807, MDBOrad1_07690, MDBOrad1_09647, MDBOrad1_09950, MDBOrad1_09951, MDBOrad1_12423, MDBOrad1_13334, MDBOrad1_14237, MDBOrad1_14238, MDBOrad1_14793, MDBOrad1_16756, MDBOrad1_17567, MDBOrad1_18108, MDBOrad1_18137, MDBOrad1_19629, MDBOrad1_19640, MDBOrad1_20512, MDBOrad1_20928
CBM1	MDBOrad1_17268, MDBOrad1_21008
CBM13	MDBOrad1_12644
CBM20	MDBOrad1_08918, MDBOrad1_13369, MDBOrad1_15675
CBM21	MDBOrad1_01825, MDBOrad1_06184, MDBOrad1_11806, MDBOrad1_12923, MDBOrad1_17721
CBM67	MDBOrad1_05770, MDBOrad1_05770, MDBOrad1_13561, MDBOrad1_16643
CE1	MDBOrad1_00493, MDBOrad1_09618, MDBOrad1_09619, MDBOrad1_20050
CE12	MDBOrad1_01311, MDBOrad1_01311, MDBOrad1_06099, MDBOrad1_11690, MDBOrad1_20725
CE15	MDBOrad1_07429, MDBOrad1_17268
CE16	MDBOrad1_02366, MDBOrad1_02366, MDBOrad1_02366, MDBOrad1_09591, MDBOrad1_10007, MDBOrad1_10008, MDBOrad1_12680, MDBOrad1_14144, MDBOrad1_14151
CE2	MDBOrad1_19480
CE3	MDBOrad1_02496, MDBOrad1_07950, MDBOrad1_07986, MDBOrad1_17767
CE4	MDBOrad1_01072, MDBOrad1_02539, MDBOrad1_10599, MDBOrad1_10635, MDBOrad1_11841, MDBOrad1_13415, MDBOrad1_15707, MDBOrad1_16959, MDBOrad1_17027, MDBOrad1_17047, MDBOrad1_17099, MDBOrad1_17108, MDBOrad1_20139
CE5	MDBOrad1_09512
CE8	MDBOrad1_09443, MDBOrad1_09462, MDBOrad1_17818
CE9	MDBOrad1_02506, MDBOrad1_02506
GH1	MDBOrad1_12385, MDBOrad1_12666, MDBOrad1_18537, MDBOrad1_18564
GH10	MDBOrad1_03008, MDBOrad1_06259, MDBOrad1_06260, MDBOrad1_11601, MDBOrad1_11610, MDBOrad1_11612, MDBOrad1_11699
GH105	MDBOrad1_02948, MDBOrad1_05973, MDBOrad1_06017, MDBOrad1_11473, MDBOrad1_12536, MDBOrad1_13162, MDBOrad1_14864, MDBOrad1_14867, MDBOrad1_15429, MDBOrad1_18164
GH109	MDBOrad1_17329, MDBOrad1_17385, MDBOrad1_17890
GH11	MDBOrad1_06444
GH115	MDBOrad1_02545, MDBOrad1_03251
GH12	MDBOrad1_11815, MDBOrad1_12537, MDBOrad1_13291, MDBOrad1_13292
GH125	MDBOrad1_02733, MDBOrad1_03024
GH127	MDBOrad1_02472, MDBOrad1_12290
GH128	MDBOrad1_02764, MDBOrad1_02990, MDBOrad1_02991, MDBOrad1_03911, MDBOrad1_04813, MDBOrad1_11582, MDBOrad1_14212
GH131	MDBOrad1_01379, MDBOrad1_14130, MDBOrad1_14131
GH135	MDBOrad1_06303
GH13_1	MDBOrad1_08561, MDBOrad1_11341, MDBOrad1_14516, MDBOrad1_15560, MDBOrad1_15598
GH13_22	MDBOrad1_10049, MDBOrad1_10049
GH13_25	MDBOrad1_08948
GH13_32	MDBOrad1_02672, MDBOrad1_08918, MDBOrad1_09163, MDBOrad1_13515
GH13_40	MDBOrad1_05030, MDBOrad1_19400, MDBOrad1_21054, MDBOrad1_21089, MDBOrad1_21103
GH13_5	MDBOrad1_06040, MDBOrad1_06273
GH13_8	MDBOrad1_02416
GH15	MDBOrad1_13369, MDBOrad1_14234, MDBOrad1_15675
GH152	MDBOrad1_04665, MDBOrad1_14482, MDBOrad1_14484, MDBOrad1_17491, MDBOrad1_20633, MDBOrad1_20668, MDBOrad1_20685
GH154	MDBOrad1_10330
GH16_1	MDBOrad1_00809, MDBOrad1_01152, MDBOrad1_03948, MDBOrad1_04295, MDBOrad1_07462, MDBOrad1_08780, MDBOrad1_08781, MDBOrad1_09374, MDBOrad1_09375, MDBOrad1_13944, MDBOrad1_13955, MDBOrad1_18393, MDBOrad1_19179, MDBOrad1_20592
GH16_10	MDBOrad1_04259, MDBOrad1_15372
GH16_19	MDBOrad1_07916, MDBOrad1_09061, MDBOrad1_09067
GH16_2	MDBOrad1_00517, MDBOrad1_02147, MDBOrad1_03026, MDBOrad1_04170, MDBOrad1_04552, MDBOrad1_06680, MDBOrad1_09051, MDBOrad1_09446, MDBOrad1_14499, MDBOrad1_16278, MDBOrad1_16597, MDBOrad1_17164, MDBOrad1_17166
GH16_23	MDBOrad1_02915
GH16_4	MDBOrad1_04675, MDBOrad1_07120, MDBOrad1_16196
GH17	MDBOrad1_05963, MDBOrad1_07113
GH18	MDBOrad1_01044, MDBOrad1_02261, MDBOrad1_02262, MDBOrad1_02727, MDBOrad1_02783, MDBOrad1_02800, MDBOrad1_03872, MDBOrad1_03873, MDBOrad1_03902, MDBOrad1_03909, MDBOrad1_06158, MDBOrad1_06460, MDBOrad1_08768, MDBOrad1_08768, MDBOrad1_11308, MDBOrad1_16611, MDBOrad1_17484, MDBOrad1_19475, MDBOrad1_19616, MDBOrad1_20033, MDBOrad1_20152, MDBOrad1_20805
GH2	MDBOrad1_06657, MDBOrad1_09017
GH20	MDBOrad1_19201, MDBOrad1_19210, MDBOrad1_19212, MDBOrad1_19217, MDBOrad1_19996
GH27	MDBOrad1_01613, MDBOrad1_05459, MDBOrad1_08031, MDBOrad1_14576, MDBOrad1_15682, MDBOrad1_15694, MDBOrad1_18409
GH28	MDBOrad1_04613, MDBOrad1_04704, MDBOrad1_06062, MDBOrad1_07081, MDBOrad1_13370, MDBOrad1_13373, MDBOrad1_15558, MDBOrad1_16500, MDBOrad1_17817
GH29	MDBOrad1_07421, MDBOrad1_13995
GH3	MDBOrad1_00465, MDBOrad1_01636, MDBOrad1_02120, MDBOrad1_06106, MDBOrad1_07685, MDBOrad1_07968, MDBOrad1_08692, MDBOrad1_08854, MDBOrad1_10917, MDBOrad1_11253, MDBOrad1_11621, MDBOrad1_11629, MDBOrad1_11631, MDBOrad1_11697, MDBOrad1_12838, MDBOrad1_16378, MDBOrad1_18639, MDBOrad1_20413, MDBOrad1_20471, MDBOrad1_20485
GH30_3	MDBOrad1_08667
GH30_4	MDBOrad1_05856
GH31	MDBOrad1_07395, MDBOrad1_08796, MDBOrad1_09360, MDBOrad1_09373, MDBOrad1_10307, MDBOrad1_14778, MDBOrad1_18717, MDBOrad1_20061
GH35	MDBOrad1_02218, MDBOrad1_08390, MDBOrad1_09288, MDBOrad1_09556, MDBOrad1_13190, MDBOrad1_13344, MDBOrad1_18181, MDBOrad1_19224, MDBOrad1_20639, MDBOrad1_20660, MDBOrad1_20666
GH37	MDBOrad1_05805, MDBOrad1_19226
GH38	MDBOrad1_11654
GH43_13	MDBOrad1_13074, MDBOrad1_13088
GH43_21	MDBOrad1_02060
GH43_22	MDBOrad1_13079
GH43_23	MDBOrad1_07366
GH43_24	MDBOrad1_00411, MDBOrad1_00424, MDBOrad1_19021
GH43_26	MDBOrad1_06431, MDBOrad1_09660
GH43_30	MDBOrad1_20079
GH43_36	MDBOrad1_09848
GH43_5	MDBOrad1_13866, MDBOrad1_13875, MDBOrad1_13879
GH43_6	MDBOrad1_11422
GH44	MDBOrad1_14620
GH45	MDBOrad1_07993, MDBOrad1_07994
GH47	MDBOrad1_02449, MDBOrad1_03254, MDBOrad1_04670, MDBOrad1_08544, MDBOrad1_08615, MDBOrad1_08625, MDBOrad1_11537, MDBOrad1_19308
GH51	MDBOrad1_02204, MDBOrad1_11344, MDBOrad1_14287, MDBOrad1_15433, MDBOrad1_15445
GH53	MDBOrad1_07419, MDBOrad1_07427
GH55	MDBOrad1_08170, MDBOrad1_11517, MDBOrad1_11531, MDBOrad1_11560
GH5_12	MDBOrad1_11736, MDBOrad1_11984
GH5_15	MDBOrad1_10582
GH5_22	MDBOrad1_14835, MDBOrad1_18382
GH5_30	MDBOrad1_04900
GH5_5	MDBOrad1_03723, MDBOrad1_03733, MDBOrad1_06152, MDBOrad1_07154
GH5_50	MDBOrad1_03076
GH5_7	MDBOrad1_00872, MDBOrad1_05350, MDBOrad1_21008
GH5_9	MDBOrad1_01358, MDBOrad1_03491, MDBOrad1_06287, MDBOrad1_11533, MDBOrad1_15680, MDBOrad1_16252, MDBOrad1_16325, MDBOrad1_16361, MDBOrad1_16362, MDBOrad1_16794, MDBOrad1_17688, MDBOrad1_18622, MDBOrad1_20842, MDBOrad1_21225
GH6	MDBOrad1_09590, MDBOrad1_11437, MDBOrad1_15394
GH63	MDBOrad1_06691, MDBOrad1_10294
GH7	MDBOrad1_05282, MDBOrad1_05283, MDBOrad1_05286, MDBOrad1_12006, MDBOrad1_16996
GH71	MDBOrad1_02278, MDBOrad1_04312, MDBOrad1_08623, MDBOrad1_13493, MDBOrad1_14306, MDBOrad1_16337, MDBOrad1_16746, MDBOrad1_16760, MDBOrad1_19042
GH72	MDBOrad1_01112
GH74	MDBOrad1_00964, MDBOrad1_00966
GH76	MDBOrad1_05222, MDBOrad1_15413, MDBOrad1_17923
GH78	MDBOrad1_02578, MDBOrad1_03140, MDBOrad1_03152, MDBOrad1_03154, MDBOrad1_03177
GH79	MDBOrad1_06469, MDBOrad1_06470, MDBOrad1_06471, MDBOrad1_07704, MDBOrad1_15075, MDBOrad1_15465
GH85	MDBOrad1_00035, MDBOrad1_00058
GH88	MDBOrad1_04490, MDBOrad1_11607, MDBOrad1_11608
GH92	MDBOrad1_09016, MDBOrad1_12539, MDBOrad1_14737, MDBOrad1_14750, MDBOrad1_20057
GH95	MDBOrad1_07721, MDBOrad1_09922
GT1	MDBOrad1_01114, MDBOrad1_01581, MDBOrad1_04333, MDBOrad1_05250, MDBOrad1_07969, MDBOrad1_11814, MDBOrad1_11826, MDBOrad1_14341, MDBOrad1_19421
GT15	MDBOrad1_03915, MDBOrad1_10066, MDBOrad1_10067, MDBOrad1_12869, MDBOrad1_13402, MDBOrad1_17701, MDBOrad1_20066, MDBOrad1_20800
GT17	MDBOrad1_13093
GT2	MDBOrad1_01279, MDBOrad1_01480, MDBOrad1_01480, MDBOrad1_02782, MDBOrad1_03563, MDBOrad1_04217, MDBOrad1_07119, MDBOrad1_07306, MDBOrad1_08240, MDBOrad1_08467, MDBOrad1_08844, MDBOrad1_08844, MDBOrad1_11009, MDBOrad1_15605, MDBOrad1_16197, MDBOrad1_16284, MDBOrad1_17728, MDBOrad1_17728, MDBOrad1_18341, MDBOrad1_18390, MDBOrad1_20626
GT20	MDBOrad1_07766, MDBOrad1_08882, MDBOrad1_18743
GT21	MDBOrad1_00510
GT22	MDBOrad1_01331, MDBOrad1_05566, MDBOrad1_09806
GT24	MDBOrad1_07458
GT25	MDBOrad1_00419
GT3	MDBOrad1_15063
GT32	MDBOrad1_02707
GT33	MDBOrad1_08361
GT35	MDBOrad1_14614
GT39	MDBOrad1_08758, MDBOrad1_08886, MDBOrad1_11286
GT4	MDBOrad1_05774, MDBOrad1_06715, MDBOrad1_09186, MDBOrad1_10211, MDBOrad1_10329
GT48	MDBOrad1_04664, MDBOrad1_10088
GT49	MDBOrad1_13165
GT50	MDBOrad1_09891
GT57	MDBOrad1_02498, MDBOrad1_14531
GT58	MDBOrad1_13082
GT59	MDBOrad1_01137
GT66	MDBOrad1_09819
GT69	MDBOrad1_15086, MDBOrad1_17787, MDBOrad1_18944, MDBOrad1_19484
GT76	MDBOrad1_02858
GT8	MDBOrad1_00910, MDBOrad1_01235, MDBOrad1_03711, MDBOrad1_07305, MDBOrad1_17486
GT90	MDBOrad1_05254, MDBOrad1_07313, MDBOrad1_16604
PL14	MDBOrad1_11847
PL14_4	MDBOrad1_09714
PL14_5	MDBOrad1_20891
PL1_2	MDBOrad1_08638, MDBOrad1_09907
PL1_4	MDBOrad1_17020, MDBOrad1_17035
PL1_7	MDBOrad1_08296, MDBOrad1_08490, MDBOrad1_08584, MDBOrad1_13485, MDBOrad1_16358, MDBOrad1_16718
PL1_9	MDBOrad1_09201
PL26	MDBOrad1_04484
PL35	MDBOrad1_00521, MDBOrad1_19375, MDBOrad1_19377
PL38	MDBOrad1_00930
PL3_2	MDBOrad1_00611, MDBOrad1_06026, MDBOrad1_06515, MDBOrad1_06516, MDBOrad1_14214
PL42	MDBOrad1_05368, MDBOrad1_05373
PL4_1	MDBOrad1_04285, MDBOrad1_04289, MDBOrad1_14508
PL8_3	MDBOrad1_00825
PL9_3	MDBOrad1_16343
